# Supplementary material
Source: PubMed Central journal article supplement (PMC5820717)
Supplement: jama-318-2099-s001.pdf [file jama-318-2099-s001.pdf]

## Prospective multicenter study MYRE

### Treatment of myeloma cast nephropathy – MYRE P081226

|                                                   |                                                                                                                                                                                                                                                                          |
|---------------------------------------------------|--------------------------------------------------------------------------------------------------------------------------------------------------------------------------------------------------------------------------------------------------------------------------|
| <b>Indication</b>                                 | Renal failure and monoclonal gammopathy                                                                                                                                                                                                                                  |
| <b>Study name</b>                                 | MYRE                                                                                                                                                                                                                                                                     |
| <b>Type of study</b>                              | Prospective multicenter study                                                                                                                                                                                                                                            |
| <b>Version and date</b>                           | Version n°7-0, May 05, 2013                                                                                                                                                                                                                                              |
| <b>Coordinating Investigator</b>                  | Prof. Jean Paul FERMAND<br>Department of Hematology and Immunology<br>Hôpital Saint Louis, Paris                                                                                                                                                                         |
| <b>Associate Coordinating Investigator</b>        | Prof. Frank BRIDOUX<br>Department of Nephrology<br>CHU Poitiers                                                                                                                                                                                                          |
| <b>Sponsor</b>                                    | Assistance Publique-Hôpitaux de Paris<br>Department of Clinical Research and<br>Development, Hôpital Saint Louis, 75010 Paris                                                                                                                                            |
| <b>Project manager</b>                            | Damien VANHOYE<br>Tel: (33) 1 44 84 17 48, Fax: (33) 1 44 84 17 99<br>damien.vanhoye@sls.aphp.fr                                                                                                                                                                         |
| <b>Clinical research unit<br/>Data management</b> | Clinical Research Unit, GH Saint Louis-Lariboisière<br>(Antenne Saint Louis)<br>Secretary: Sabrina DUBIEF<br>Tel: (33) 1 42 49 97 42, Fax: (33) 1 42 49 97 45<br>sec.dbim@univ-paris-diderot.fr                                                                          |
| <b>Clinical Research Assistants (CRA)</b>         | Malika YAHMI, Amel GABSI<br>Clinical Research Unit, GH Saint Louis<br>Lariboisière, Paris (Antenne Saint Louis)<br>Tel: (33)142385292/5274 Fax: (33)142385325<br>Anne LEA (Poitiers)<br>Department of Nephrology, CHU Poitiers<br>Tel: (33)549443075, Fax: (33)549443077 |
| <b>Statistician</b>                               | Sylvie CHEVRET<br>Department of Biostatistics and Medical<br>Information, Hôpital Saint Louis, Paris                                                                                                                                                                     |
| <b>Supervision Committee</b>                      | Pierre RONCO (Paris), A. JACCARD (Limoges),<br>B. MOULIN (Strasbourg), C. COMBE (Bordeaux),<br>P. MOREAU (Nantes), Michel ATTAL (Toulouse)                                                                                                                               |

Page de SIGNATURE D'UN PROTOCOLE de recherche biomédicale  
par l'investigateur COORDONNATEUR et le représentant du PROMOTEUR

Recherche biomédicale N° P081226

**Titre : Traitement de la néphropathie à cylindres myélomateux  
Etude MYRE**

Version N° Version n°7-0, 13/05/2013

L'investigateur coordonnateur  
**Professeur Jean-Paul FERMAND**  
*Service d'Héмато-Immunologie*  
HOPITAL SAINT-LOUIS  
1 AV CLAUDE VELLEFAUX  
75010 PARIS

Date : .....  
Signature :

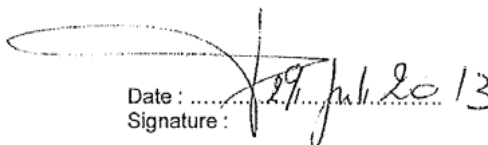  
29 Jul 2013

Le promoteur :  
**Monsieur Christophe MISSE**  
Assistance publique – hôpitaux de Paris  
Délégation Interrégionale à la Recherche Clinique  
Hôpital Saint Louis  
75010 PARIS

Date : .....  
Signature :

31 JUL. 2013



**NB : cette version correspond au texte du protocole et annexes adressés au CPP  
et à l'autorité compétente respectivement pour avis et demande d'autorisation et aux  
autres interlocuteurs de recherche (directeurs d'hôpitaux...).**

*Si ensuite une autre version est rédigée suite à des modifications, il faut refaire le circuit des  
signatures afin d'être toujours à jour des versions du protocole actif.*

## Table of contents

---

|                                                                                               |           |
|-----------------------------------------------------------------------------------------------|-----------|
| <b>STUDY SUMMARY</b> .....                                                                    | <b>5</b>  |
| <b>1. RATIONALE</b> .....                                                                     | <b>7</b>  |
| A) <i>SYMPTOMATIC TREATMENT</i> .....                                                         | 8         |
| B) <i>CHEMOTHERAPY</i> .....                                                                  | 9         |
| <b>2. STUDY OBJECTIVES</b> .....                                                              | <b>10</b> |
| <b>3. STUDY DESIGN</b> .....                                                                  | <b>10</b> |
| A) <i>INCLUSION/SCREENING PERIOD</i> .....                                                    | 10        |
| B) <i>RANDOMIZATION</i> .....                                                                 | 11        |
| <b>4. RANDOMIZATION PROCEDURE</b> .....                                                       | <b>12</b> |
| <b>5. PART 1: TREATMENT OF PATIENTS NOT REQUIRING HEMODIALYSIS</b> .....                      | <b>13</b> |
| A) <i>MODALITIES OF TREATMENT WITH BORTEZOMIB-DEXAMETHASONE (BDGROUP)</i> .....               | 13        |
| B) <i>MODALITIES OF TREATMENT WITH CYCLOPHOSPHAMIDE-BORTEZOMIB-DEXAMETHASONE (C-BD)</i> ..... | 15        |
| <b>6. PART 2: TREATMENT OF PATIENTS REQUIRING HEMODIALYSIS</b> .....                          | <b>18</b> |
| A) <i>MODALITIES OF HEMODIALYSIS SESSIONS</i> .....                                           | 18        |
| «HCO» group.....                                                                              | 18        |
| Control group.....                                                                            | 19        |
| B) <i>MODALITIES OF HEMODIALYSIS MONITORING</i> .....                                         | 19        |
| C) <i>MODALITIES OF CHEMOTHERAPY IN HEMODIALYSIS PATIENTS</i> .....                           | 19        |
| <b>7. INITIAL EVALUATION, COMPLEMENTARY INVESTIGATIONS</b> .....                              | <b>21</b> |
| A) <i>INITIAL EVALUATION</i> .....                                                            | 21        |
| B) <i>FOLLOW-UP EVALUATION</i> .....                                                          | 22        |
| <b>8. JUDGEMENT CRITERIA</b> .....                                                            | <b>22</b> |
| A) <i>PRIMARY OUTCOME</i> .....                                                               | 22        |
| B) <i>SECONDARY OUTCOMES</i> .....                                                            | 22        |
| <b>9. STATISTICS</b> .....                                                                    | <b>23</b> |
| A) <i>COMPUTATION OF SAMPLE SIZE</i> .....                                                    | 23        |
| B) <i>STATISTICAL ANALYSIS</i> .....                                                          | 23        |
| <b>10. SAFETY EVALUATION</b> .....                                                            | <b>24</b> |
| <b>11. PROCEDURES OF TEMPORARY OR PERMANENT TREATMENT INTERRUPTION</b> .....                  | <b>27</b> |
| <b>12. CASE REPORT FORM</b> .....                                                             | <b>28</b> |
| <b>13. ETHICAL CONSIDERATIONS</b> .....                                                       | <b>28</b> |
| <b>14. DATA PROCESSING AND STORAGE</b> .....                                                  | <b>29</b> |
| <b>15. ACCESS RIGHTS AND SOURCE DOCUMENTS</b> .....                                           | <b>30</b> |
| <b>16. QUALITY CONTROL AND ASSURANCE</b> .....                                                | <b>30</b> |
| <b>17. FUNDING AND INSURANCE</b> .....                                                        | <b>31</b> |

|                                                                                                                  |           |
|------------------------------------------------------------------------------------------------------------------|-----------|
| <b>18. FINAL RESEARCH REPORT.....</b>                                                                            | <b>31</b> |
| <b>19. DATA PUBLICATION RULES AND INTELLECTUAL PROPERTY RIGHTS.....</b>                                          | <b>31</b> |
| <b>20. REFERENCES .....</b>                                                                                      | <b>32</b> |
| APPENDIX 1. EVALUATION OF RENAL FUNCTION.....                                                                    | 34        |
| APPENDIX 2. AKIN (ACUTE KIDNEY INJURY NETWORK) CLASSIFICATION/STAGING SYSTEM FOR ACUTE KIDNEY INJURY.....        | 35        |
| APPENDIX 3. COMMON TERMINOLOGY CRITERIA FOR ADVERSE EVENTS .....                                                 | 36        |
| APPENDIX 4. HEMATOLOGIC RESPONSE CRITERIA.....                                                                   | 37        |
| APPENDIX 5: C-VTD REGIMEN.....                                                                                   | 38        |
| APPENDIX 6: DURIE SALMON AND ISS STAGING SYSTEMS FOR MULTIPLE MYELOMA.....                                       | 39        |
| APPENDIX 7: ECOG PERFORMANS STATUS.....                                                                          | 40        |
| APPENDIX 8: NEW YORK HEART ASSOCIATION (NYHA) FUNCTIONAL CLASSIFICATION SYSTEM FOR CONGESTIVE HEART FAILURE..... | 41        |
| APPENDIX 9: LIST OF PARTICIPATING CENTRES.....                                                                   | 42        |
| APPENDIX 10: STUDY SYNOPSIS – SCREENING/INCLUSION PERIOD PRIOR TO RANDOMIZATION.....                             | 60        |
| APPENDIX 11: STUDY SYNOPSIS –PATIENTS NOT REQUIRING HEMODIALYSIS: RANDOMIZATION OF CHEMOTHERAPY.....             | 61        |
| APPENDIX 12: STUDY SYNOPSIS – PATIENTS REQUIRING HEMODIALYSIS: RANDOMIZATION OF DIALYSIS MEMBRANE.....           | 62        |
| APPENDIX 13: SUMMARY OF PRODUCT CHARACTERISTICS.....                                                             | 63        |
| APPENDIX 13: CLASSIFICATION OF ADVERSE EVENTS.....                                                               | 64        |
| APPENDIX 14: SCHEDULE OF ASSESSMENTS.....                                                                        | 67        |
| APPENDIX 15: SEVERE ADVERSE EVENT REPORTING FORM.....                                                            | 68        |

## STUDY SUMMARY

### PROSPECTIVE MULTICENTER STUDY MYRE: Treatment of myeloma cast nephropathy

|                                            |                                                                                                                                                                                                                                                                                                                                                                                                                                                                                                                                                                                                                                                                                                                                                                                                                                                                                                                                           |
|--------------------------------------------|-------------------------------------------------------------------------------------------------------------------------------------------------------------------------------------------------------------------------------------------------------------------------------------------------------------------------------------------------------------------------------------------------------------------------------------------------------------------------------------------------------------------------------------------------------------------------------------------------------------------------------------------------------------------------------------------------------------------------------------------------------------------------------------------------------------------------------------------------------------------------------------------------------------------------------------------|
| <b>STUDY OBJECTIVES</b>                    | In patients with multiple myeloma (MM) complicated with inaugural renal failure secondary to myeloma cast nephropathy (MCN), to evaluate the effect on renal function of: <ul style="list-style-type: none"> <li>- bortezomib (Velcade<sup>®</sup>) plus dexamethasone (Neodex<sup>®</sup>) (BD), compared with cyclophosphamide (Endoxan<sup>®</sup>) plus bortezomib and dexamethasone (C-BD), in patients not requiring hemodialysis</li> <li>- an intensive hemodialysis regimen using either a dialyzer with very high permeability to proteins (Theralite<sup>™</sup>), or a conventional high-flux dialyzer, combined with chemotherapy with BD, in patients requiring hemodialysis</li> </ul>                                                                                                                                                                                                                                     |
| <b>Coordinating Investigator</b>           | <b>Prof Jean Paul FERMAND</b><br><b>Department of Clinical Immunology, Hôpital Saint Louis, Paris</b>                                                                                                                                                                                                                                                                                                                                                                                                                                                                                                                                                                                                                                                                                                                                                                                                                                     |
| <b>Associate Coordinating Investigator</b> | <b>Prof Frank BRIDOUX</b><br><b>Department of Nephrology, University Hospital Poitiers</b>                                                                                                                                                                                                                                                                                                                                                                                                                                                                                                                                                                                                                                                                                                                                                                                                                                                |
| <b>EXPERIMENTAL PLAN</b>                   | Prospective randomized multicenter controlled trial with two parallel groups stratified according to the requirement of hemodialysis                                                                                                                                                                                                                                                                                                                                                                                                                                                                                                                                                                                                                                                                                                                                                                                                      |
| <b>NUMBER OF PATIENTS</b>                  | 284 patients (including 93 x 2 not requiring dialysis and 49 x 2 requiring hemodialysis)                                                                                                                                                                                                                                                                                                                                                                                                                                                                                                                                                                                                                                                                                                                                                                                                                                                  |
| <b>NUMBER OF CENTRES</b>                   | 125                                                                                                                                                                                                                                                                                                                                                                                                                                                                                                                                                                                                                                                                                                                                                                                                                                                                                                                                       |
| <b>CRITERIA OF RANDOMIZATION</b>           | <ol style="list-style-type: none"> <li>1) Renal failure (serum creatinine &gt;170 µmol/l and estimated glomerular filtration rate (eGFR) calculated using the MDRD equation &lt;40 ml/min/1.73m<sup>2</sup>).</li> <li>2) Secondary to MCN, probable (albuminuria &lt;30% of total urine proteins, with albuminuria &lt;500 mg/24h and et urine albumin/creatinine ratio &lt;300 mg/g), or biopsy-proven (kidney biopsy is mandatory for patients randomized in the hemodialysis part of the study).</li> <li>3) Established diagnosis of multiple myeloma, with measurable serum monoclonal Ig by conventional electrophoresis, and/or Bence Jones proteinuria &gt;0.5g/24h, and/or serum free LC level &gt;2 x upper limit of normal (ULN), with abnormal kappa/lambda ratio.</li> <li>4) Absolute neutrophil count ≥1.0 x 10<sup>9</sup>/L and platelet count ≥70 x 10<sup>9</sup>/L.</li> <li>5) Written informed consent.</li> </ol> |
| <b>CRITERIA OF NON-RANDOMIZATION</b>       | <ol style="list-style-type: none"> <li>1. Any nephropathy other than MCN (ex: amyloidosis).</li> <li>2. MCN associated with another LC-related renal disorder (ex: MCN + AL amyloidosis) except for MCN associated with amorphous linear peritubular LC deposits (i.e. LCDD without nodular glomerulosclerosis).</li> <li>3. Any uncontrolled medical condition, co-morbidity, psychiatric disorder or biological abnormality that might interfere with subject's participation or ability to sign an informed consent form.</li> <li>4. Severe pre-existing chronic kidney disease with eGFR &lt;30 ml/min/1.73 m<sup>2</sup>, whatever its origin; patient on chronic dialysis or renal transplanted patient.</li> <li>5. Patients who received more than 7 hemodialysis sessions prior to randomization.</li> <li>6. Patients who were started on hemodialysis more than 15 days prior to the date of randomization</li> </ol>         |

|                            |                                                                                                                                                                                                                                                                                                                                                                                                                                                                                                                                                                                                                                                                                                                                                                                                                                                                                                                                                                                                                                                                                                                                                                                                                                                                                                                                                     |
|----------------------------|-----------------------------------------------------------------------------------------------------------------------------------------------------------------------------------------------------------------------------------------------------------------------------------------------------------------------------------------------------------------------------------------------------------------------------------------------------------------------------------------------------------------------------------------------------------------------------------------------------------------------------------------------------------------------------------------------------------------------------------------------------------------------------------------------------------------------------------------------------------------------------------------------------------------------------------------------------------------------------------------------------------------------------------------------------------------------------------------------------------------------------------------------------------------------------------------------------------------------------------------------------------------------------------------------------------------------------------------------------|
|                            | <p>7. Patients who received more than one session of hemofiltration or hemodiafiltration before randomization.</p> <p>8. Patients who received plasma exchanges before randomization.</p> <p>9. Concomitant severe disease, including cancer or non-malignant conditions.</p> <p>10. Positive HIV serology, active hepatitis B or hepatitis C infection, or active herpes/VZV viral infection.</p> <p>11. Patient treated with more than one course of anti-myeloma chemotherapy, and/or who received corticosteroid treatment with a total dose equivalent to more than 160 mg of Dexamethasone, or more than 1 mg/kg/day of Prednisone during 1 month.</p> <p>12. Patient who received more than 4 IV or SC injections of bortezomib (Velcade®) before the inclusion/screening phase.</p> <p>13. Hepatic insufficiency, AST (SGOT) and ALT (SGPT) &gt;10 x ULN and/or persistent cholestasis (alkaline phosphatases or gammaGT &gt;5 x ULN)</p> <p>14. Severe preexisting peripheral neuropathy</p> <p>15. Any contraindication to high-dose steroids</p> <p>16. Any contraindication to bortezomib treatment</p> <p>17. Patient without affiliation to the French National Security system.</p> <p>18. Inability to comply with study procedures</p> <p>19. In women of child bearing potential, a positive pregnancy test or breast feeding</p> |
| <b>PRIMARY ENDPOINT</b>    | <p>Improvement in renal function after 3 cycles of chemotherapy (at the latest 3 months after randomization), as evaluated by:</p> <ul style="list-style-type: none"> <li>- in patients requiring hemodialysis: the rate of hemodialysis independence</li> <li>- in patients not requiring hemodialysis: the rate of renal response defined by achievement of serum creatinine level <math>\leq 170 \mu\text{mol/l}</math> or estimated glomerular filtration rate (GFR) calculated using the modified MDRD equation <math>\geq 40 \text{ ml/min/1.73m}^2</math> (i.e., renal function compatible with eligibility for intensive treatment of MM)</li> </ul>                                                                                                                                                                                                                                                                                                                                                                                                                                                                                                                                                                                                                                                                                        |
| <b>SECONDARY ENDPOINTS</b> | <ul style="list-style-type: none"> <li>• Improvement in renal function (same criteria) after 1 cycle of chemotherapy, after completion of the studied chemotherapy protocol, at 6 months and 1 year after randomization.</li> <li>• Complete renal recovery, defined by return to baseline level of serum creatinine or eGFR (if known), or by eGFR <math>\geq 60 \text{ ml/min/1.73m}^2</math> after 1 and 3 cycles of chemotherapy, after completion of the studied chemotherapy protocol, at 6 months and 1 year after randomization.</li> <li>• Renal function, as evaluated by calculation of eGFR after 1 and 3 cycles of chemotherapy, after completion of the studied chemotherapy protocol, at 6 months and 1 year after randomization</li> <li>• Hematologic response, after 1 and 3 cycles of chemotherapy, after completion of the studied chemotherapy protocol, at 6 months and 1 year after randomization</li> <li>• Relapse-free survival, event-free survival and time to subsequent myeloma therapy, measured from randomization</li> <li>• 12 month-overall survival</li> <li>• Tolerance to treatment, particularly incidence of hematologic and peripheral nerve complications</li> </ul>                                                                                                                                      |
| <b>DURATION OF STUDY</b>   | <p>Total duration: 4 years</p> <p>Duration of the inclusion period: 3 years</p> <p>Duration of participation and follow-up: 1 year</p>                                                                                                                                                                                                                                                                                                                                                                                                                                                                                                                                                                                                                                                                                                                                                                                                                                                                                                                                                                                                                                                                                                                                                                                                              |

## 1. RATIONALE

Renal failure is a severe and frequent complication in multiple myeloma (MM), occurring in nearly half of the patients during the course of the disease (Rayner 1991, Rota 1987). In more than two third of the cases, renal failure results from myeloma cast nephropathy (MCN) due to cast precipitation in the renal distal tubule lumens, secondary to the interaction of monoclonal immunoglobulin (Ig) light chains (LC) with uromodulin (Tamm-Horsfall protein) (Pirani 1987, Rota 1987, Sakhuja 2000). Ig LC, which are freely filtered through the glomerulus, are physiologically reabsorbed in the proximal tubular cells, through a mechanism of endocytosis mediated by a tandem of receptors (cubilin and megalin), and then degraded in the lysosomal compartment of the proximal tubular cell (Birn 2006). Therefore, MCN is nearly always observed in the context of high-grade MM, with production of large amounts of Ig LC, exceeding the capacity of proximal tubular catabolism. Renal failure in MCN results not only from tubular obstruction by LC casts, but also from severe tubulo-interstitial inflammation, characterized by infiltrates of macrophages, mononuclear cells and giant cells around casts, resulting in major damage of the tubulo-interstitial compartment (Pirani 1987). Tubulo-interstitial inflammation is enhanced by massive proximal tubular reabsorption of monoclonal LC, leading to phosphorylation of MAP kinases (p38 MAPK) and activation of transcription factors (NF- $\kappa$ B, AP-1) that generate local production of pro-inflammatory cytokines such as tumor necrosis factor (TNF)- $\alpha$ , interleukin 6 and 8, and monocyte-chemoattractant protein (MCP)-1 (Batuman 2007). Cellular injury is accompanied by morphologic and functional alterations of proximal tubular cells, including epithelial-mesenchymal transition (Li 2008). MCN is usually triggered by various facilitating factors, namely dehydration, hypercalcemia, infections, contrast media, or nephrotoxic drugs (non-steroidal anti-inflammatory agents, diuretics, angiotensin converting-enzyme inhibitors, or angiotensin receptor antagonists). The risk of MCN is also influenced by the amount of monoclonal LC excreted in the urine, and it is particularly high in MM patients with Bence Jones proteinuria over 2 g/day (Cohen 1984, Ronco 2001).

MCN usually presents as acute or sub-acute renal failure, isolated or sometimes associated with general symptoms related to high tumour mass MM, such as skeletal pains related to lytic bone lesions.

Renal prognosis of MCN remains poorly defined, with sometimes inconsistent data in the literature, mainly due to the lack of histopathological confirmation of renal lesions in most series. Furthermore, some of these series are old and in most cases, chemotherapy regimens varied greatly, including low or high-dose steroids. Moreover, renal response was usually not correlated with hematologic response assessed using modern tools, such as nephelometric assays for serum free LC. It is usually considered that renal function improves with treatment of MM in 50 to 60% of patients (Knudsen 2000), and in only 20 to 40% of those who require dialysis support (Clark 2005, Chanan-Khan 2007). Recent data suggest that these results might be significantly improved with the use of modern chemotherapy agents such as bortezomib or thalidomide, combined with high-dose dexamethasone (Tosi 2004, Ludwig 2007, Kastiris 2007). It is generally assumed that persistence of renal failure despite chemotherapy is predictive of poor patient survival in MM. Indeed, in a retrospective series published in 1998, median survival was only 4 months in patients with persistent renal impairment, compared to 28 months in patients who experienced renal recovery after chemotherapy (Bladé 1998).

Treatment of MCN relies on symptomatic measures and on the introduction of chemotherapy aiming at rapidly controlling the production of monoclonal LC by malignant plasma cells.

## **A) SYMPTOMATIC TREATMENT**

Symptomatic treatment is a key step in the management of MCN. It is based on the correction of precipitating factors (vigorous rehydration, correction of hypercalcemia and treatment of infections) with administration of sodium bicarbonate to obtain a urine pH  $\geq 7$ . Indeed, acidic urine promotes the formation of myeloma casts, by enhancing homotypic aggregation of Tamm-Horsfall protein, and its interaction with urine free LC. Some reducing agents such as colchicine might theoretically inhibit the aggregation of Tamm-Horsfall protein with monoclonal LC but their benefit in clinical use remains unproven (Sanders 1992, Ronco 2001).

Rapid removal of circulating monoclonal LC, through plasmapheresis or intensive hemodialysis using new protein-leaking dialyzers with high permeability to proteins, could also represent an interesting treatment strategy in MCN. In a randomized controlled study of 107 patients with acute renal failure (which type was not confirmed histologically) contemporary to the diagnosis of MM, plasmapheresis (5 to 7 exchanges of 50 ml/kg body weight) coupled with a chemotherapy regimen based on VAD (vincristine-adriamycine-dexamethasone), or melphalan plus prednisone, did not show a significant effect on a composite criterion defined by death, or dialysis-dependent renal failure, or severe renal failure with a glomerular filtration rate  $< 30 \text{ ml/min/1.73 m}^2$ , compared to chemotherapy alone (Clark 2005). Recently, Leung et al. have suggested that histological confirmation of MCN is critical to correctly interpret the effects of therapy in MM patients with renal failure. In a retrospective series of 40 patients, kidney biopsy, performed in 28 cases, showed pure MCN in 18 patients. Only in patients with biopsy-proven MCN, the combination of plasmapheresis with high-dose dexamethasone based chemotherapy induced improvement in renal function in 45% of patients and in 75 % of those whose serum free LC levels decreased by more than 50% with treatment. By contrast, no correlation between renal response and reduction in serum free LC levels was observed in patients without biopsy-proven MCN (Leung 2008). These data indicate that pathological confirmation of the nature of renal lesions is important to evaluate the impact of therapy in MM patients with renal failure.

Recently, it was shown that an extended hemodialysis protocol, using a new generation dialyzer with very high permeability to proteins (Gambro HCO 1100™), was highly efficient in removing circulating free LC (with 35 to 70% reduction of serum free LC levels after 2 hours of hemodialysis) in patients with MM and severe renal failure. The authors tested a daily hemodialysis treatment strategy using this membrane as a complementary therapy in 5 patients with biopsy-proven MCN. Duration of dialysis sessions ranged between 2 to 12 hours, and in some cases, 2 or 3 dialyzers in series were used after the first or second dialysis sessions. Among the 5 patients who all received various chemotherapy regimens containing dexamethasone, improvement of renal function with subsequent dialysis withdrawal was achieved in 3. Clinical tolerance of extended dialysis with the protein-leaking dialyzer HCO 1100™ was good, despite the fact, that, on account of the high membrane permeability to large molecules, a perfusion of 20 to 40 g of albumin was required at the end of each dialysis session (Hutchison 2007). In a subsequent series of 19 patients, a similar hemodialysis regimen associated with conventional chemotherapy based on cyclophosphamide (7 patients), thalidomide (14 patients), vincristine/doxorubicin (1 patient), and high-dose dexamethasone (all patients), induced a significant reduction in the concentration of serum free LC in 13 patients (median reduction rate of 85%, range: 50 to 97%). In these 13 patients, hemodialysis was withdrawn after 4 weeks (median time 27 days, range: 13 to 120 days). In 6 patients, chemotherapy was stopped because of recurrent infectious complications: renal recovery occurred in one patient at day 105, whereas the 5 remaining patients were still dialysis-dependent. Survival of patients free of dialysis was significantly higher in this series (Hutchison 2009).

Preliminary data from case reports indicate that daily dialysis sessions of 4 to 6 hours, using a single HCO 1100™ dialyzer instead of 2 dialyzers in series, might be sufficient to obtain efficient removal of circulating LC and improvement in renal function (Bachmann 2008). The real benefit of this



novel dialysis strategy in patients remains to be confirmed in large randomized trials dedicated to MM patients with severe renal failure and biopsy-proven MCN.

### **B). CHEMOTHERAPY**

The choice and modalities of initial chemotherapy in patients with MCN remain poorly defined. Rapid introduction of treatment, immediately after diagnostic confirmation, is essential to obtain a swift and profound reduction in the rate of production of monoclonal LC and to induce a renal response, a key prognostic factor for patient survival.

In young patients, improvement or recovery of renal function is also mandatory for consideration of eligibility for high-dose therapy, which is currently considered as the standard of care of symptomatic MM in this population. Intensive therapy usually consists of few courses of « classical » chemotherapy, followed by bone marrow stem cell mobilization through injections of growth factor with or without chemotherapy, stem cell collection, and then high-dose chemotherapy (usually based on an injection of 200 mg/m<sup>2</sup> of melphalan) and re-injection of bone marrow stem cells. In patients over 65 years in age, who are not eligible to intensive therapy, the reference treatment consists either in classical 4-day monthly courses of melphalan plus prednisone per-os associated with daily low-dose thalidomide (Facon 2007), or in the oral melphalan plus prednisone regimen reinforced by bortezomib (San Miguel 2008).

Most randomized controlled studies that demonstrated a benefit of intensive treatment compared to standard chemotherapy did not include patients with impaired renal function (usually defined as a serum creatinine level >150 µmol/L). Small series have shown that intensive treatment is feasible in myeloma patients with chronic renal failure, even in patients requiring chronic hemodialysis, but with significantly higher morbidity and mortality rates (Badros 2001, Knudsen 2005). In patients with dialysis-dependent renal failure, high dose therapy allows recovery of renal function in only few cases (Lee 2004). To date, the benefit over risk ratio of intensive therapy in myeloma patients with persistent renal failure remains uncertain and its indication and modalities are far from being established. Furthermore, even the choice of first-line chemotherapy in patients with multiple myeloma and inaugural renal failure is still poorly defined. Because of its anti-inflammatory properties, high-dose dexamethasone is considered as mandatory (Kastritis 2007). However, little attention has been paid to the agents that should be associated with high-dose steroids in this situation. Renal elimination of many agents used in the treatment of MM limits their use in patients with renal failure: for example, if an alkylating agent is considered, cyclophosphamide should be preferred to melphalan. The VAD regimen (Vincristine, Doxorubicin, Dexamethasone) has been widely employed, despite cardiac toxicity associated with doxorubicin and peripheral nerve complications with vincristine (Haubitz 2006).

The recent introduction of novel agents, initially thalidomide, then the proteasome-inhibitor bortezomib, and, more recently, lenalidomide (Revlimid®), has modified the strategy of initial chemotherapy in MM with renal failure. Metabolism of thalidomide in patients with renal failure is poorly defined. Due to the risk of central nervous system side-effects, including seizures, thalidomide dose should not exceed 200 mg/day. Moreover, serum potassium levels should be closely monitored, as severe hyperkalemia has been described in thalidomide-treated myeloma patients with advanced renal failure (Fakhouri 2004). Bortezomib may be used without dose adaptation for the treatment of MM with renal failure, even in patients requiring hemodialysis, with safety and efficacy profiles similar to MM patients with preserved renal function (Jagannath 2005, Chanan-Khan 2007, San Miguel 2008). Bortezomib-related side effects mainly involve gastro-intestinal tract, bone marrow (thrombocytopenia) and peripheral nerve. The risk of peripheral neuropathy is decreased when bortezomib is injected subcutaneously, without loss of efficacy (Moreau 2011). Because of its potent inhibitory effect on Nf-κB mediated production of pro-inflammatory cytokines, which is likely to play a central role in tubulointerstitial inflammation in MCN, bortezomib appears as the molecule of choice as first-line therapy in MM with renal failure, in association with high-dose dexamethasone.

Lenalidomide, which is mainly eliminated through the kidney, should be used with reduced dose adapted to the severity of renal failure. All these new drugs, commonly used in combination with high-dose dexamethasone, have proven to be efficient in the treatment of myeloma in patients with preserved renal function, by inducing hematologic remission in most cases, usually within the first month. Moreover, a complete hematologic response is achieved in a significant proportion of patients, reaching 30% when these drugs are used in combination with dexamethasone and an alkylating agent (Mateos 2006). The impact on renal function of rapid very good hematologic responses obtained with novel agents has not been investigated in prospective controlled studies.

Given these data, the combination of bortezomib and dexamethasone is currently the standard of care in MM with renal failure, even if it has not been evaluated prospectively, particularly regarding the duration of hematologic responses. It is likely that the duration of hematologic remission could be increased with the adjunction of an alkylating agent, which may further improve renal prognosis without inducing higher frequency of adverse events (San Miguel 2008).

To address these issues, we have designed a prospective multicenter study that will evaluate the benefit of reinforcing the current reference regimen bortezomib-dexamethasone with cyclophosphamide. Cyclophosphamide is the most commonly used alkylating agent in patients with renal failure, and is part of the CTD (Cyclophosphamide-Thalidomide-Dexamethasone) regimen, currently given as first line therapy in MM in the UK (Kyriakou 2005, Sidra 2006). In a retrospective study, the Cyclophosphamide-Bortezomib-Dexamethasone (C-BD) regimen resulted in hematologic response rate of 75% (including complete responses), higher than that obtained with BD and with similar tolerance profile (Davies, 2007). In a prospective phase II study, Reeder et al have confirmed the efficacy of the C-BD regimen, with cyclophosphamide given orally, which produced a hematologic response rate of 88% and complete response or very good partial response rate of 39% (Reeder, 2009). The optimal dose of intravenous cyclophosphamide in association with BD was determined in another recent study (Kropff, 2009).

## **2. STUDY OBJECTIVES**

The aim of the present randomized controlled phase III trial in patients with renal failure contemporary to the diagnosis of myeloma, or complicating the course of previously diagnosed but non-treated myeloma, is to evaluate the effect on renal function of:

- The association of bortezomib plus dexamethasone, reinforced or not with cyclophosphamide in patients not requiring dialysis. Randomization will be stratified according to patient age and to the severity of acute kidney injury, based on Acute Kidney Injury Network (AKIN) classification.
- An intensive dialysis regimen using either a conventional dialysis membrane, or the new generation protein-leaking HCO dialyzer 2.1 m<sup>2</sup> in surface (Theralite™) in patients requiring hemodialysis. Given the small number of patients potentially enrollable within a reasonable duration of inclusion period, all will receive the same chemotherapy with dexamethasone and bortezomib.

## **3. STUDY DESIGN**

The present study is a prospective randomized multicenter controlled trial with two parallel groups stratified according to the requirement of hemodialysis at the time of inclusion. Before randomization, all eligible patients will enter a screening/inclusion phase that will serve to validate inclusion criteria.

### **A) INCLUSION/SCREENING PERIOD**

The study starts with a screening phase that will include all potentially eligible patients presenting with acute kidney injury and monoclonal gammopathy. This inclusion period is dedicated to secure the diagnosis of MCN, and to verify that significant renal impairment persists after symptomatic

measures and correction of precipitating factors. Each patient will be considered potentially eligible when meeting the following criteria:

1. Age  $\geq 18$  years.
2. Detectable serum and/or monoclonal immunoglobulin (Ig) (whatever its isotype) and/or isolated monoclonal LC.
3. Renal failure with serum creatinine  $>170 \mu\text{mol/L}$  and/or eGFR  $<40 \text{ ml/min/1.73 m}^2$  (MDRD).
4. Having received no more than one course of chemotherapy usually given for the treatment of MM or other lymphoid malignancy.
5. Fully informed and did not expressed opposition.
6. Affiliation to the national Social Security system.

**During the inclusion period, the following procedures are performed:**

- Correction of precipitating factors, such as dehydration through saline and alkaline fluid administration, withdrawal of nephrotoxic drugs, treatment of hypercalcemia, treatment of infections with antibiotics (if applicable). Alkaline therapy should aim at achieving a urine pH  $>6.5$ . The use of bisphosphonate therapy is permitted. Loop diuretics (furosemide, bumetamide) should be avoided, and, if necessary, used only after appropriate rehydration.
- I.V. methylprednisolone (Solumedrol®) 400 mg/day, or oral dexamethasone 40 mg/day, for 4 days.
- bone marrow aspiration (or biopsy if required), including molecular studies (FISH and/or PCR) according to local practice, and all explorations required for the diagnosis of MM.
- in case of clinical suspicion of amyloidosis, a minor salivary gland biopsy, or other pertinent biopsy (abdominal fat) will be performed.
- A kidney biopsy will be required in patients with urine albumin excretion above 500 mg/day, or urine albumin over creatinine ratio  $>300 \text{ mg/g}$ , or if albuminuria represents  $\geq 30\%$  of proteinuria on urine protein electrophoresis. A kidney biopsy will be required in all patients presenting with anuria or requiring dialysis. In the other situations, the indication of a kidney biopsy should be evaluated in each patient, according to the local investigator's judgement. It is highly recommended in patients with newly diagnosed MM revealed by AKI without any obvious precipitating factor, and in patients with IgM monoclonal gammopathy.

**B) RANDOMIZATION**

Randomization will be performed between day 4 and day 16 post-inclusion. However, patients with MM and renal failure who already received symptomatic measures (rehydration, correction of precipitating factors) and corticosteroid therapy equivalent to dexamethasone 40 mg or methylprednisolone (Solumedrol®) 400 mg for 4 days, can be randomized immediately.

**Randomization criteria are:**

1. Persistent renal failure, as defined by serum creatinine  $>170 \mu\text{mol/L}$  and eGFR  $<40 \text{ ml/min/1.73m}^2$ .
2. Secondary to MCN, probable (albuminuria  $<30\%$  of total proteinuria, with albuminuria  $<500 \text{ mg/day}$ , and urine albumin over creatinine ratio  $<300 \text{ mg/g}$ , or proven by a kidney biopsy (whenever required by the clinical context or analysis of proteinuria). The association of AL amyloidosis with MCN is a criterion of exclusion. However, the association of MCN with amorphous peritubular monoclonal light chain deposits is not a criterion of exclusion, providing there is no evidence of glomerular lesions (nodular glomerulosclerosis) related to light chain deposition disease.
3. Confirmed diagnosis of multiple myeloma. The diagnosis of MM implicates the presence of significant bone marrow plasma cell infiltration. MM should secrete a measurable monoclonal Ig, i.e. with detectable serum monoclonal Ig by conventional electrophoresis, and/or Bence-Jones proteinuria  $>0.5\text{g/j}$ , and/or serum free LC level  $>2 \times \text{ULN}$ , with abnormal kappa/lambda ratio.
4. Signed informed consent form for participating to either the chemotherapy part of the study, or the hemodialysis part, as appropriate.

5. Absolute neutrophil count  $\geq 1.0 \times 10^9/L$  and platelet count  $\geq 70 \times 10^9/L$ .

**Patients with any of the following exclusion criteria will not be randomized:**

1. Any nephropathy other than MCN (ex: amyloidosis).
2. MCN associated with another LC-related renal disorder (ex: MCN + AL amyloidosis) except for MCN associated with amorphous linear peritubular LC deposits (i.e. LCDD without nodular glomerulosclerosis).
3. Any uncontrolled medical condition, co-morbidity, psychiatric disorder or biological abnormality that might interfere with subject's participation or ability to sign an informed consent form.
4. Severe pre-existing chronic kidney disease with eGFR  $< 30 \text{ ml/min/1.73 m}^2$ , whatever its origin; patient on chronic dialysis or renal transplanted patient.
5. Patients who received more than 7 hemodialysis sessions prior to randomization.
6. Patients who were started on hemodialysis more than 15 days prior to the date of randomization.
7. Patients who received more than one session of hemofiltration or hemodiafiltration before randomization.
8. Patients who received plasma exchanges before randomization.
9. Concomitant severe disease, including cancer or non-malignant conditions.
10. Positive HIV test, or active hepatitis B or C virus infection, or HSV/VZV viral infection.
11. Patient who previously received more than one course of chemotherapy for the treatment of myeloma and/or corticoid therapy equivalent to more than 160 mg of dexamethasone, or more than 1 mg/kg/day of prednisone for a month (excluding methylprednisolone pulses during the inclusion phase).
12. Patient who received more than 4 I.V. or S.C. injections of bortezomib (Velcade®) before the inclusion/screening phase.
13. Hepatic insufficiency, AST (SGOT) and ALT (SGPT)  $> 10 \times \text{ULN}$  and/or persistent cholestasis (alkaline phosphatases or gammaGT  $> 5 \times \text{ULN}$ ).
14. Subjects with pre-existing severe peripheral neuropathy.
15. Any contraindication to high-dose steroids.
16. Any contraindication to bortezomib, particularly related to lung or pericardial disorders.
17. Patient without affiliation to the French National Security system.
18. Inability to comply with study procedures.
19. In women of child bearing potential, a positive pregnancy test or breast feeding.

**For patients in whom MM and renal failure are diagnosed in a context that requires admission to an intensive care unit (ICU), for other reasons, such as infection:**

- These patients can be screened. If they require hemodialysis, hemodialysis procedures will be performed in the ICU at the responsible physician's discretion.
- Randomization is allowed before the 16<sup>th</sup> day after screening, providing that they meet all the above criteria, including the ability to give signed informed consent, and providing that they did not receive more than 1 session of hemofiltration or hemodiafiltration.

**4. RANDOMIZATION PROCEDURE**

Randomization will be centralized online, through a secured internet connection. Randomization lists will be predefined in each subgroup (patients requiring or not hemodialysis) and equilibrated according to permutation blocks, the size of which will be blinded to investigators.

Two different situations will be distinguished:

1. Patients not requiring hemodialysis at the time of randomization will be randomized to receive two different chemotherapy regimens: **Bortezomib-Dexamethasone (BD)**, or **Cyclophosphamide-Bortezomib-Dexamethasone (C-BD)**. Randomization will be equilibrated according to age (over or less than 65 years) and to stage of acute kidney injury as defined by the AKIN criteria (cf appendix 2).

2. Patients requiring hemodialysis at the time of randomization will be assigned to an intensive hemodialysis protocol using either the new generation protein-leaking dialyzer Gambro Theralite™, or a conventional high-flux membrane. Given the small number of patients potentially randomized in this part of the study, all will receive the same chemotherapy regimen with **Bortezomib-Dexamethasone**.

Randomization will be equilibrated according to age (over or less than 65 years) and, if applicable, on prior randomization of chemotherapy (i.e. patients enrolled in the first part of the study who require hemodialysis before the second course of chemotherapy will be randomized on a separate list, in order to equilibrate their repartition in the 2 arms of the hemodialysis part of the study).

## **5. PART 1: TREATMENT OF PATIENTS NOT REQUIRING HEMODIALYSIS**

Patients who do not require hemodialysis at the time of randomization will be randomly assigned to receive either the Bortezomib-Dexamethasone regimen (BD group), or the Cyclophosphamide-Bortezomib-Dexamethasone regimen (C-BD group). Modalities of treatment administration are as defined in the Summary of product Characteristics (SmPC) (Appendix 13).

### **A) MODALITIES OF TREATMENT WITH BORTEZOMIB-DEXAMETHASONE (BD GROUP)**

Treatment is started on the day of randomization (day 1). The BD regimen consists of:

- Bortezomib 1.3 mg/m<sup>2</sup> (preferentially subcutaneously) twice weekly for 2 weeks (on days 1, 4, 8, and 11), followed by a 10 day-period without treatment (days 12-21). This period of 21 days is considered as a cycle of treatment. An interval of at least 72 hours is required between two consecutive injections of bortezomib.

The subcutaneous route should be used preferentially, without modification of the dose or administration schedule, and using the adapted dilution (2.5 mg/ml instead of 1 mg/ml for the I.V. route). The I.V. route can be used in the following conditions: i) severe obesity, ii) severe oedema iii) local skin conditions contraindicating the use of subcutaneous injections, iv) patient's refusal of subcutaneous injections. In the event of a local reaction, the following injections should be performed at other injection sites. If local reaction recurs on novel injection sites, it is recommended to use the I.V. route. The reconstituted solution of Velcade® 3.5 mg/ml is administered in thighs (left or right) or in the abdomen (left or right). The solution should be injected subcutaneously, using a 45 to 90 degree angle. It is recommended to alternate injection sites between each consecutive injection. If local reaction occurs after a subcutaneous injection of Velcade®, it is recommended to use a solution reconstituted at lower concentration (Velcade® 3.5 mg reconstituted at 1 mg/ml instead of 2.5 mg/ml) for S.C. injection, or to consider the I.V. route.

- Dexamethasone 20 mg on days 1, 2, 4, 5, 8, 9, 11 and 12, i.e. on the day of each injection of bortezomib, and on the day after. The use of Neodex® (dexamethasone) is recommended. In case of gastrointestinal symptoms (vomiting), steroid therapy should be administered transiently through I.V. route (using 200 mg of Solumedrol® for 20 mg of dexamethasone)

The regimen is given for 3 cycles in the absence of serious side-effect. Appropriate supportive measures should be performed, at the local investigator's discretion. It is recommended to consider prevention of gastrointestinal side-effects with proton pump-inhibitors, antibiotherapy with sulfamethoxazole-trimethoprim (Bactrim forte®), and prophylactic treatment of herpes virus infections (Zelitrex® 500mg/day). The use of nephrotoxic agents (aminoglycosides, non-steroidal anti-inflammatory agents, diuretics) and contrast media should be avoided.

### Adaptation of therapy:

In patients aged over 80 years, from the beginning of the second cycle of chemotherapy, it is possible to perform 4 weekly injections of bortezomib 1.3 mg/m<sup>2</sup> (preferentially using the subcutaneous route), with dexamethasone given on the day and the day after each bortezomib injection. This adaptation is at the local investigator's discretion. It results in the modification of the duration of chemotherapy cycles, from 21 days to 35 days.

The dose of bortezomib is unchanged in patients with impaired renal function. The occurrence of steroid-related side effects may lead to an adaptation of the dexamethasone dose, at the local investigator's discretion.

Absolute neutrophil count must be  $\geq 1.0 \times 10^9$ , and platelet count must be  $\geq 70 \times 10^9$  before starting each BD cycle. If not, introduction of BD should be postponed by 8 days. After this interval, if cytopenias are still present, bortezomib is reintroduced using a 25% lower dose (i.e. 1.3 mg/m<sup>2</sup> reduced to 1 mg/m<sup>2</sup>; 1 mg/m<sup>2</sup> reduced to 0.7 mg/m<sup>2</sup>).

Full blood count should be monitored weekly throughout the duration of chemotherapy. Once a cycle has been started, bortezomib should be interrupted if any of the following occurs:

- Non-hematologic grade 3 toxicity (cf appendix 3)
- Grade 4 hematologic toxicity (platelets  $< 30 \times 10^9/l$ , or neutrophils  $< 0.5 \times 10^9/l$ ).

In this situation, Bortezomib should be stopped until the next cycle. At that time:

- If symptoms of toxicity have disappeared, bortezomib is reintroduced using a 25% lower dose (i.e. 1.3 mg/m<sup>2</sup> reduced to 1 mg/m<sup>2</sup>; 1 mg/m<sup>2</sup> reduced to 0.7 mg/m<sup>2</sup>)
- In case of persistent symptoms or relapsing symptoms with the lower dose, withdrawal of bortezomib should be considered.

In bortezomib-treated patients who develop neuropathic pain or peripheral neuropathy, the following measures should be applied (table 1):

| Table 1: Instructions for bortezomib dose modifications in case of neuropathic pain and/or peripheral neuropathy |                                                                                                                    |
|------------------------------------------------------------------------------------------------------------------|--------------------------------------------------------------------------------------------------------------------|
| Severity                                                                                                         | Dose modification                                                                                                  |
| Grade 1 (paresthesias, muscle weakness and/or reduced deep tendon reflexes) without pain or incapacity           | None                                                                                                               |
| Grade 1 with pain, or grade 2 (not interfering with usual daily activities)                                      | Reduce to 1 mg/m <sup>2</sup>                                                                                      |
| Grade 2 with pain, or grade 3 (interfering with usual daily activities)                                          | Stop bortezomib until disappearance of symptoms. Resume bortezomib at a dose of 0.7 mg/m <sup>2</sup> once a week. |
| Grade 4 (permanent sensitive loss with incapacity)                                                               | Stop bortezomib                                                                                                    |

*On the basis of bortezomib dose adaptation in phase II and phase III studies in multiple myeloma*

At the end of each cycle, patient survival, tolerance to treatment, renal response (i.e. serum creatinine  $\leq 170 \mu\text{mol/L}$  and/or estimated glomerular filtration rate (GFR) calculated using the modified MDRD equation  $\geq 40 \text{ ml/min/1.73m}^2$ ), and hematologic response (cf appendix 4) will be evaluated.



- In case of worsening renal failure requiring hemodialysis:
  - o If hemodialysis is required before the second cycle of chemotherapy, the patient will be considered for randomization in the dialysis part of the study, with either the Theralite™ dialyzer, or a conventional high-flux dialyzer. The patient will be considered as non-responder in the comparison of BD versus C-BD. In case of patient refusal, hemodialysis sessions will be performed using a conventional dialyzer, at the local investigator's discretion and according to local practice. If not, the patient will be randomized in the hemodialysis part of the study. The patient will receive appropriate information using the specific information notice. Signed informed consent must be obtained before randomization in the hemodialysis part of the study.
  - o If hemodialysis is required after the second cycle of chemotherapy, the patient will not be randomized for the dialysis membrane. Chemotherapy regimen will not be modified. Hemodialysis sessions will be performed using a conventional dialyzer, with dialysis modalities at local investigator's discretion and according to local practice.
- In case of side-effect leading to permanent bortezomib interruption, the patient will be withdrawn from the study and treatment of myeloma will be at the local investigator's discretion.

After the third cycle of BD:

1. In patients aged less than 65 years, eligible for intensive treatment, who have achieved both hematologic response ( $\geq$  PR, cf appendix 4) **and** renal response (serum creatinine  $\leq$ 170  $\mu$ mol/l or eGFR  $\geq$ 40 ml/min/1.73m<sup>2</sup>): **collection of peripheral blood stem cells (after G-CSF only), followed by high-dose melphalan (200 mg/m<sup>2</sup>) and blood stem cell transplantation** is recommended, in the absence of contraindication.
2. In patients who have achieved hematologic response ( $\geq$ PR, cf appendix 4), but who are not eligible for intensive treatment (age >65 years), or did not achieve a renal response, or who show renal progression (even requiring hemodialysis): **administration of three more courses of Bortezomib-Dexamethasone** is recommended
3. In patients who do not achieve a hematologic response (<PR, cf appendix 4), whatever the renal response, it is strongly recommended to reinforce chemotherapy with **by the adjunction of cyclophosphamide, i.e. introduction of a C-BD regimen**, for 3 cycles (cf infra).

After the sixth cycle of BD:

1. In patients aged less than 65 years, eligible for intensive treatment, who have achieved both hematologic response ( $\geq$ PR, cf appendix 4) **and** renal response (serum creatinine  $\leq$ 170  $\mu$ mol/l or eGFR  $\geq$ 40 ml/min/1.73m<sup>2</sup>): **collection of peripheral blood stem cells (after G-CSF only), followed by high dose melphalan (200 mg/m<sup>2</sup>) and blood stem cell transplantation** is recommended.
2. In all other situations, treatment of myeloma will be at the local investigator's discretion.

***B) MODALITIES OF TREATMENT WITH CYCLOPHOSPHAMIDE-BORTEZOMIB-DEXAMETHASONE (C-BD GROUP)***

Treatment is started on the day of randomization (day 1). The C-BD regimen consists of:

- Bortezomib 1.3 mg/m<sup>2</sup> (preferentially subcutaneously) twice weekly for 2 weeks (on days 1, 4, 8, and 11), followed by a 10 day-period without treatment (days 12-21). This period of 21 days is considered as a cycle of treatment. An interval of at least 72 hours is required between two consecutive injections of bortezomib.
- Dexamethasone 20 mg on days 1, 2, 4, 5, 8, 9, 11 and 12, i.e. on the day of each injection of bortezomib, and on the day after. The use of Neodex® (dexamethasone) is recommended. In case of gastrointestinal symptoms (vomiting), steroid therapy should be administered transiently through I.V. route (using for example 200 mg of Solumedrol® instead of 20 mg of dexamethasone).
- Cyclophosphamide 750 mg/m<sup>2</sup> on day 1, through a short I.V. infusion (30 min to 2 hours)

Treatment is delivered over this period of 21 days, which is considered as 1 cycle of treatment. The regimen is given for 3 cycles in the absence of serious side-effect. Appropriate supportive measures, including those required by the use of steroids, should be performed at the local investigator's discretion. It is recommended to consider prevention of nausea, of gastrointestinal side-effects with proton pump-inhibitors, prophylactic antibiotherapy with sulfamethoxazole-trimethoprim (Bactrim forte®) and prophylactic treatment of herpes virus infections (Zelitrex® 500mg/day). With the recommended dose of cyclophosphamide, it is not necessary to give systematic bladder protection.

The use of nephrotoxic agents (aminoglycosides, non-steroidal anti-inflammatory agents, diuretics) and contrast media should be avoided.

#### Adaptation of therapy:

In patients aged over 80 years, from the beginning of the second cycle of chemotherapy, it is possible to perform 4 weekly injections of bortezomib 1.3 mg/m<sup>2</sup> (preferentially using the subcutaneous route), with dexamethasone given on the day and the day after each bortezomib injection. This adaptation is at the local investigator's discretion. It results in the modification of the duration of chemotherapy cycles, from 21 days to 35 days.

Doses of cyclophosphamide and of bortezomib are unchanged in patients with impaired renal function. In patients who might require hemodialysis, cyclophosphamide and bortezomib should be administered I.V at the end of a dialysis session. The occurrence of steroid-related side effects may lead to an adaptation of the dexamethasone dose, at the local investigator's discretion.

Full blood count should be monitored weekly throughout the duration of chemotherapy.

Absolute neutrophil count must be  $\geq 1.0 \times 10^9$ , and platelet count must be  $\geq 70 \times 10^9$  before starting each C-BD cycle. If not, introduction of C-BD should be postponed by 8 days. After this interval, if cytopenias are still present, bortezomib **AND** cyclophosphamide should be re-introduced at lower doses:

- Bortezomib: dose reduced from 1.3 mg/m<sup>2</sup> to 1.0 mg/m<sup>2</sup>; or from 1.0 mg/m<sup>2</sup> to 0.7 mg/m<sup>2</sup>
- Cyclophosphamide: reduced from 750 mg/m<sup>2</sup> to 600 mg/m<sup>2</sup>; or from 600 mg/m<sup>2</sup> to 300 mg/m<sup>2</sup>

Once a cycle has been started, bortezomib should be stopped until the next cycle, in case of:

- non-hematologic grade 3 toxicity (cf appendix 3)
- grade 4 hematologic toxicity (platelets  $< 30 \times 10^9/l$ , or neutrophils  $< 0.5 \times 10^9/l$ )

In this situation, bortezomib should be stopped until the next cycle. At that time:

1. If symptoms of toxicity have disappeared, bortezomib **and** cyclophosphamide should be re-introduced, at lower doses:
  - Bortezomib: reduced from 1.3 mg/m<sup>2</sup> to 1.0 mg/m<sup>2</sup>; or from 1.0 mg/m<sup>2</sup> to 0.7 mg/m<sup>2</sup>



- Cyclophosphamide: reduced from 900 mg/m<sup>2</sup> to 600 mg/m<sup>2</sup>; from 600 mg/m<sup>2</sup> to 300 mg/m<sup>2</sup>
- 2. In case of persistent toxicity or if toxicity reoccurs despite lower doses of cyclophosphamide and bortezomib, cyclophosphamide should be stopped.

In Bortezomib-treated patients who develop neuropathic pain or peripheral neuropathy, appropriate measures should be applied, as described above (table 1).

At the end of each cycle, patient survival, tolerance to treatment, renal response (i.e. serum creatinine  $\leq 170$   $\mu\text{mol/L}$  or estimated glomerular filtration rate (GFR) calculated using the modified MDRD equation  $\geq 40$  ml/min/1.73m<sup>2</sup>), and hematologic response (cf appendix 4) will be evaluated.

- In case of worsening renal failure requiring hemodialysis:
  - o If hemodialysis is required before the second cycle of chemotherapy, the patient will be considered for randomization in the dialysis part of the study and assigned to receive either the Theralite™ dialyzer, or a conventional high-flux dialyzer. Treatment with C-BD will be stopped, and the patient will be switched to the BD regimen, according to the modalities described above. The patient will be considered as non-responder in the comparison of BD versus C-BD. In case of patient refusal, C-BD regimen will be maintained, and hemodialysis sessions will be performed using a conventional dialyzer, with dialysis modalities at the local investigator's discretion and according to local practice.
  - o If hemodialysis is required after the second cycle of chemotherapy, the patient will not be randomized for the dialysis membrane. Chemotherapy regimen (C-BD) will not be modified. Hemodialysis sessions will be performed using a conventional dialyzer, with dialysis modalities performed at local investigator's discretion, according to local practice.
- In case of side-effect leading to permanent interruption of cyclophosphamide **and** bortezomib, the patient will be withdrawn from the study and treatment of myeloma will be at the local investigator's discretion.

After the third cycle of C-BD:

1. In patients aged less than 65 years, eligible for intensive treatment, who have achieved both hematologic response ( $\geq$  PR, cf appendix 4) **and** renal response (serum creatinine  $\leq 170$   $\mu\text{mol/L}$  or eGFR  $\geq 40$  ml/min/1.73m<sup>2</sup>): **collection of peripheral blood stem cells (after G-CSF only), followed by high-dose melphalan (200 mg/m<sup>2</sup>) and blood stem cell transplantation** is recommended, in the absence of contraindication.
2. In patients who have achieved hematologic response ( $\geq$ PR, cf appendix 4), but who are not eligible for intensive treatment (age >65 years), or who did not achieve a renal response, or who show renal progression (even requiring hemodialysis): **administration of three more courses of Cyclophosphamide-Bortezomib Dexamethasone** is recommended
3. In patients who do not achieve a hematologic response ( $<$  PR, cf appendix 4), whatever the renal response, it is strongly recommended to reinforce chemotherapy with the **adjunction of thalidomide**, i.e. introduction of a C-VTD regimen (Cyclophosphamide-Bortezomib-Thalidomide-Dexamethasone), for 3 cycles (cf appendix 4). In case of any contra-indication to thalidomide, the choice of chemotherapy will be at the local investigator's discretion

After the sixth cycle of C-BD:

1. In patients aged less than 65 years, eligible for intensive treatment, who have achieved both hematologic response ( $\geq$ PR, cf appendix 4) **and** renal response (serum creatinine  $\leq 170$   $\mu\text{mol/L}$  or eGFR  $\geq 40$  ml/min/1.73m<sup>2</sup>): **collection of peripheral blood stem cells (after G-CSF only), followed by high dose melphalan (200 mg/m<sup>2</sup>) and blood stem cell transplantation** is recommended.

2. In all other situations, treatment of myeloma will be at the local investigator's discretion.

## **6. PART 2: TREATMENT OF PATIENTS REQUIRING HEMODIALYSIS**

For patients requiring hemodialysis, 2 situations should be distinguished:

1. Patients requiring hemodialysis after the end of screening period will be randomly assigned to receive hemodialysis either with the Theralite™ dialyzer, or with a conventional high-flux dialyzer. Randomization will occur before the first hemodialysis session, or before the second dialysis session in patients needing emergency dialysis. All patients will receive the same chemotherapy regimen with Bortezomib-Dexamethasone (BD).

2. Patients not requiring hemodialysis at the end of the screening period, who have been initially randomized to receive either the BD or C-BD (see above) may secondarily require dialysis support. Only patients who received no more than 1 cycle of protocol chemotherapy (BD or C-BD) will be eligible for randomization in the use of the dialysis membrane. In patients from the C-BD group, cyclophosphamide will be interrupted and the Bortezomib-Dexamethasone regimen will be used at the second cycle of chemotherapy.

### Indications of hemodialysis:

Indication for hemodialysis should be considered in any patient with  $eGFR \leq 10$  ml/min/1.73m<sup>2</sup>. The decision of starting hemodialysis will be at the local investigator's discretion. The following criteria for initiation of hemodialysis are recommended:

- Severe hyperkalemia ( $>6$  mmol/l) or rapid increase in serum potassium level
- Severe metabolic acidosis (arterial pH  $<7.1$ )
- Poor clinical tolerance of renal failure (encephalopathy, severe fluid retention)
- Anuria  $\geq 24$  hours

### **A). MODALITIES OF HEMODIALYSIS SESSIONS**

The choice and site of insertion of the hemodialysis catheter will be at the local investigator's discretion, in accordance to local protocols.

According to their randomization arm, patients will be dialyzed using either:

- the Gambro Theralite™ dialyzer of 2.1 m<sup>2</sup> in surface (HCO group).
- a conventional high-flux dialyzer (control group) with an ultrafiltration coefficient  $>14$  ml/min (Eknoyan 2002) and  $\geq 1.8$  m<sup>2</sup> in surface. The use of one of the following membrane types, polyacrylonitrile, polysulfone, or PMMA, is recommended.

### **HCO group:**

a) As long as patients do not have criteria for dialysis withdrawal, 8 hemodialysis sessions will be performed over the first 10 days following randomization. The duration of each hemodialysis session will be of 5 hours. Dialysis sessions will be performed using a single Theralite™ dialyzer, with blood flow  $\geq 250$  ml/min and dialysate flow  $\geq 300$  ml/min. Fluid removal will be determined by the supervising investigator, aiming not to induce hypovolemia. Anticoagulation will be performed using heparin according to local practice (with similar dose as for hemodialysis with a conventional dialyzer, according to manufacturer's recommendation). Serum albumin levels will be measured at the beginning of each dialysis session. If serum albumin level is  $<25$  g/l, a perfusion of 20g of albumin (100 ml of albumin 20g/100ml) will be performed at the end of the dialysis session.

b) From the 11<sup>th</sup> day, if dialysis is still indicated, 3 weekly hemodialysis sessions will be performed with the same modalities as described above. In patients who do not achieve a renal response, Theralite™ dialyzers will be provided until completion of the third cycle of chemotherapy. If the patient further

requires hemodialysis after this period, the choice of dialyzer will be at the local investigator's discretion. It is recommended to use the same hemodialysis modalities as for the control group. Duration and periodicity of hemodialysis sessions are also at the local investigator's discretion.

**Control group:**

Hemodialysis sessions will be performed according to local habits, using high-flux biocompatible dialyzers, as specified above. The duration of each session is 5 hours. As long as patients do not have criteria for dialysis withdrawal, 8 hemodialysis sessions will be performed over the first 10 days following randomization. From the 11<sup>th</sup> day, if dialysis is still indicated, 3 weekly hemodialysis sessions will be performed. Fluid removal will be determined by the supervising investigator, aiming not to induce hypovolemia. Anticoagulation will be prescribed according to local practice. Serum albumin levels will be measured at the beginning of each dialysis session. If serum albumin level is <25 g/l, a perfusion of 20g of albumin (100 ml of albumin 20g/100ml) will be performed at the end of the dialysis session.

***B). MODALITIES OF HEMODIALYSIS MONITORING***

The usual clinical surveillance will be applied, according to local practice. The following biological parameters will be measured:

- Before each dialysis session: serum Na, K, Cl, HCO<sub>3</sub>, calcium, phosphate, total protein, serum albumin, full blood count
- After each dialysis session: same parameters, except for full blood count
- Before and after the first 3 dialysis sessions, then once weekly before and after hemodialysis: serum free light chains

The monitoring of parameters for dialysis efficiency, such as percentage of urea reduction, ionic dialysance, and KT/V is recommended, as appropriate.

***C). MODALITIES OF CHEMOTHERAPY IN HEMODIALYSIS PATIENTS***

All patients will receive the same Bortezomib-Dexamethasone regimen, as described page 13, section 5, paragraph a) « Modalities of treatment with Bortezomib-Dexamethasone (BD group) ». Bortezomib injections will be systematically performed at the end of the dialysis sessions on hemodialysis days. Three cycles of BD will be administered, followed by evaluation of renal and hematologic responses after the third cycle. Modalities of treatment adaptation will be similar as described above.

Treatment is started on the day of randomization (day 1). The BD regimen consists of:

- Bortezomib 1.3 mg/m<sup>2</sup> (preferentially subcutaneously) twice weekly for 2 weeks (on days 1, 4, 8, and 11), followed by a 10 day-period without treatment (days 12-21). This period of 21 days is considered as a cycle of treatment. An interval of at least 72 hours is required between two consecutive injections of bortezomib.
- Dexamethasone 20 mg on days 1, 2, 4, 5, 8, 9, 11 and 12, i.e. on the day of each injection of Bortezomib, and on the day after. The use of Neodex® (dexamethasone) is recommended. In case of gastrointestinal symptoms (vomiting), steroid therapy should be administered transiently through I.V. route (using for example 200 mg of Solumedrol® instead of 20 mg of dexamethasone).

The regimen is given for 3 cycles in the absence of serious side-effect. Appropriate supportive measures should be performed, at the local investigator's discretion. It is recommended to consider

prevention of gastrointestinal side-effects with proton pump-inhibitors, antibiotherapy with sulfamethoxazole-trimethoprim (Bactrim forte®), and prophylactic treatment of herpes virus infections (Zelitrex® 500mg/day).

The use of nephrotoxic agents (aminoglycosides, non-steroidal anti-inflammatory agents, diuretics) and contrast media should be avoided.

#### Adaptation of therapy:

In patients aged over 80 years, from the beginning of the second cycle of chemotherapy, it is possible to perform 4 weekly injections of bortezomib 1.3 mg/m<sup>2</sup> (preferentially using the subcutaneous route), with dexamethasone given on the day and the day after each bortezomib injection. This adaptation is at the local investigator's discretion. It results in the modification of the duration of chemotherapy cycles, from 21 days to 35 days.

The dose of bortezomib is unchanged in patients on hemodialysis. The occurrence of steroid-related side effects may lead to an adaptation of the dexamethasone dose, at the local investigator's discretion.

Absolute neutrophil count must be  $\geq 1.0 \times 10^9$ , and platelet count must be  $\geq 70 \times 10^9$  before starting each BD cycle. If not, introduction of BD should be postponed by 8 days. After this interval, if cytopenias are still present, bortezomib is reintroduced using a 25% lower dose (i.e. 1.3 mg/m<sup>2</sup> reduced to 1 mg/m<sup>2</sup>; 1 mg/m<sup>2</sup> reduced to 0.7 mg/m<sup>2</sup>)

Full blood count should be monitored weekly throughout the duration of chemotherapy.

Once a cycle has been started, bortezomib should be interrupted if any of the following occurs:

- non-hematologic grade 3 toxicity (cf appendix 3)
- grade 4 hematologic toxicity (platelets  $< 30 \times 10^9/l$ , or neutrophils  $< 0.5 \times 10^9/l$ )

In this situation, bortezomib should be stopped until the next cycle. At that time:

- if symptoms of toxicity have disappeared, bortezomib is reintroduced using a 25% lower dose (i.e. 1.3 mg/m<sup>2</sup> reduced to 1 mg/m<sup>2</sup>; 1 mg/m<sup>2</sup> reduced to 0.7 mg/m<sup>2</sup>)
- In case of persistent symptoms or relapsing symptoms with the lower dose, withdrawal of bortezomib should be considered.

In bortezomib-treated patients who develop neuropathic pain or peripheral neuropathy, adapted measures should be applied (table 1, page 14).

At the end of each cycle, patient survival, tolerance to treatment, renal response (i.e. serum creatinine  $\leq 170 \mu\text{mol/L}$  or estimated glomerular filtration rate (GFR) calculated using the modified MDRD equation  $\geq 40 \text{ ml/min/1.73m}^2$ ), and hematologic response (cf appendix 4) will be evaluated. In case of side-effect leading to permanent bortezomib interruption, the patient will be withdrawn from the study and treatment of myeloma will be at the local investigator's discretion.

#### After the third cycle of BD:

1. In patients aged less than 65 years, eligible for intensive treatment, who have achieved both hematologic response ( $\geq \text{PR}$ , cf appendix 4) **and** renal response (serum creatinine  $\leq 170 \mu\text{mol/l}$  or eGFR  $\geq 40 \text{ ml/min/1.73m}^2$ ): **collection of peripheral blood stem cells (after G-CSF only), followed by high-dose melphalan (200 mg/m<sup>2</sup>) and blood stem cell transplantation** is recommended, in the absence of contraindication.

2. In patients who have achieved hematologic response ( $\geq$ PR, cf appendix 4), but who are not eligible for intensive treatment (age  $>65$ years), or did not achieve a renal response: **administration of three more courses of Bortezomib-Dexamethasone** is recommended

3. In patients who do not achieve a hematologic response ( $<$ PR, cf appendix 4), whatever the renal response, it is strongly recommended to reinforce chemotherapy with the **introduction of a C-BD regimen (reinforcement of BD by the adjunction of cyclophosphamide)**, for 3 cycles. Modalities of the C-BD regimen in hemodialysis patients are similar to those detailed page 15.

After the sixth cycle of BD:

1. In patients aged less than 65 years, eligible for intensive treatment, who have achieved both hematologic response ( $\geq$  PR, cf appendix 4) **and** renal response (serum creatinine  $\leq 170$   $\mu\text{mol/l}$  or eGFR  $\geq 40$  ml/min/1.73m<sup>2</sup>): **collection of peripheral blood stem cells (after G-CSF only), followed by high dose melphalan (200 mg/m<sup>2</sup>) and blood stem cell transplantation** is recommended.

2. In all other situations, treatment of myeloma will be at the local investigator's discretion.

## **7. INITIAL EVALUATION, COMPLEMENTARY INVESTIGATIONS**

### **A) INITIAL EVALUATION**

Before the introduction of chemotherapy (i.e. between day 1 and day 3 post-randomization), complete clinical and biological evaluation of multiple myeloma will be performed, and renal function will be assessed with calculation of eGFR using the simplified MDRD equation (cf appendix 1).

Multiple myeloma stage will be defined, according to Durie and Salmon and to ISS systems (cf appendix 6).

Complete physical examination will be performed with collection of vital parameters, body weight, blood pressure, heart rate, 24-hour urine excretion, ECOG performans status (cf appendix 7). Significant results of baseline physical examination will be recorded.

Biological tests at baseline will include the following:

Blood:

- Full blood count.
- Coagulation profile (prothrombin time and activated cephalin time).
- Serologic tests for HIV, hepatitis B, hepatitis C, HSV and VZV infections.
- Serum creatinine and urea.
- Serum electrolytes (Na, K, Cl, HCO<sub>3</sub>).
- Total calcium, phosphate.
- Serum albumin.
- Serum protein electrophoresis.
- Serum FLC.
- Beta-2 microglobulin, LDH.
- C-reactive protein.
- Serum immunoelectrophoresis or immunofixation. Serum should be stored for the entire duration of the study.
- Hepatic tests.
- Beta HCG, in women of child bearing potential.

Urine chemistry (on 24-hour urines, if applicable)

- Urine electrolytes (Na, K, Cl), urea, creatinine.
- 24-hour proteinuria.
- Urine protein electrophoresis and immunoelectrophoresis or immunofixation.
- Urine dipstick analysis with measurement of pH.

Other:

- Bone marrow aspiration/or biopsy (if not performed before), including cytogenetics and molecular studies of malignant plasma cells, according to local practice.
- Skeleton X-ray survey if required (skull, spine, upper and lower limbs, pelvis).
- Chest radiography.

### **B) FOLLOW-UP EVALUATION**

The following tests will be performed at the beginning of each chemotherapy cycle, after the third and sixth cycles of chemotherapy, and at 6 and 12 months post-randomization:

- Full blood count.
- Coagulation profile (prothrombin time and activated cephalin time).
- Serum creatinine and urea.
- Serum electrolytes (Na, K, Cl, HCO<sub>3</sub>).
- Total calcium, phosphate.
- Serum albumin.
- Serum uric acid.
- Serum protein electrophoresis.
- Serum FLC.
- C-reactive protein.
- Urine electrolytes (Na, K, Cl), urea, creatinine.
- 24-hour proteinuria.
- Urine dipstick analysis with measurement of pH.
- Urine protein electrophoresis.

Serum and urine immunoelectrophoresis or immunofixation will be performed at 6 and 12 months.

## **8. JUDGEMENT CRITERIA**

### **A). PRIMARY OUTCOME**

Improvement in renal function after 3 cycles of protocol chemotherapy (at 3 months at the latest), as evaluated by:

- In patients requiring hemodialysis: by the cumulative incidence of hemodialysis independence. Hemodialysis independence is defined by the achievement of eGFR calculated using the modified MDRD equation  $>15 \text{ ml/min/1.73 m}^2$ , 15 days after the last hemodialysis session.
- In patients not requiring hemodialysis, by the achievement of a serum creatinine level  $\leq 170 \mu\text{mol/l}$  or an estimated glomerular filtration rate (GFR) calculated using the modified MDRD equation  $\geq 40 \text{ ml/min/1.73m}^2$  (i.e., renal function compatible with eligibility for intensive treatment of MM)

### **B). SECONDARY OUTCOMES**

- Improvement in renal function (same criteria) after 1 cycle of chemotherapy, after completion of protocol chemotherapy, at 6 months and 1 year after randomization.
- Complete renal recovery, defined by return to baseline level of serum creatinine or eGFR (if known), or by eGFR  $\geq 60 \text{ ml/min/1.73m}^2$  after 1 and 3 cycles of chemotherapy, after completion of protocol chemotherapy, at 6 months and 1 year after randomization.
- Renal function, as evaluated by eGFR level after 1 and 3 cycles of chemotherapy, after completion of protocol chemotherapy, at 6 months and 1 year after randomization
- Hematologic response, after 1 and 3 cycles of chemotherapy, after completion of protocol chemotherapy, at 6 months and 1 year after randomization (cf appendix 4)
- Relapse-free survival, event free survival, time to next myeloma therapy, and overall survival measured from randomization
- Tolerance to treatment, particularly the occurrence of cytopenias, infectious or haemorrhagic adverse events, and peripheral neuropathy.

## 9. STATISTICS

### **A). COMPUTATION OF SAMPLE SIZE**

In patients requiring hemodialysis: the primary end-point is the cumulative incidence of hemodialysis independence at 3 months. With the assumption of a 30% cumulative incidence of hemodialysis independence in the control group, it is necessary to recruit two groups of 49 patients to demonstrate a 30% benefit (i.e., a 60% cumulative incidence of hemodialysis independence) in the experimental arm, with a tolerable risk of type I and type II error set at 5% and 20%, respectively.

In patients not requiring dialysis: the primary endpoint is renal response after 3 cycles of chemotherapy. With the assumption of 50% of patients having achieved a renal response at 3 months in the reference group (BD), it is necessary to recruit 2 groups of 93 patients to demonstrate a 20% benefit (i.e., 70% of renal response) in the experimental arm (C-BD), with a tolerable risk of type I and type II error set at 5% and 20%, respectively.

### **B) STATISTICAL ANALYSIS**

#### **Statistical analysis plan.**

The two parts (hemodialysis and non hemodialysis patients) of the study will be analyzed separately. Analyses will be performed in a modified intention-to-treat basis, that is, only patients who violated the eligibility criteria or those with consent withdrawal, can be excluded from the analysis. Patients not requiring dialysis will participate to the comparison of the 2 chemotherapy arms. Among these, patients secondarily requiring hemodialysis and included in the hemodialysis part of the study, will be considered as treatment failures for the comparison of the 2 chemotherapy arms, in their randomly allocated chemotherapy arm. For the calculation of event-free survival, they will be considered as events, and the duration of event-free survival will be defined as the time to the first hemodialysis session. For the calculation of renal survival, they will be censored at the time of the first hemodialysis session. Patients in the hemodialysis part of the study will participate to the comparison of the 2 hemodialysis strategies (HCO or conventional dialyzer) for all end-point criteria, whatever their outcome, from the day of randomization and in their randomly allocated hemodialysis arm.

#### **Interim analysis**

For safety and ethical concerns, an interim analysis will be performed 1 year after the date of the first randomization, or after the effective randomization of 40 patients in the chemotherapy part of the study and of 20 patients in the hemodialysis part. Interim analysis will be dedicated to the evaluation of tolerance and mortality, and results will be reported to the Data and Safety Monitoring Board (DSMB) (see page 25). Because the aim of interim analysis is not the comparison of primary or secondary endpoints, no adaptation of the type I error rate will be realized.

#### **Statistical tests and methods**

Binary outcomes measured will be estimated using punctual estimates with 95% confidence interval. Treatment effect will be measured by odds ratio estimated from logistic model. Comparisons between the randomization groups on the secondary endpoints will be based on appropriate bilateral formulation tests. The continuous criteria will be compared by Mann and Whitney rank tests; qualitative criteria by chi2 tests or exact Fisher tests; the censored criteria by log-rank tests, unless there is competition (or informative censoring) of the observations, in which case a cumulative incidence will be estimated and comparison based on Gray tests. Failure-time data (overall survival and event-free survival) will be computed from date of randomization, estimated by the Kaplan Meier method, then compared by the log-rank test, with treatment size effect measured by hazard ratios (HR) estimated from Cox models. Proportional hazards assumptions will be checked.



Safety will be evaluated by the incidence rates of reported severe adverse events by patient-years of treatment exposure. The center effect will be studied.

The threshold of significance will be set at 5% for all the tests of the statistical terminal analysis, which will therefore intervene at the end of the inclusions. All analyses will be based on SAS (SAS Inc, Cary, NC) and R (<http://www.Rproject.org>) packages

## **10. SAFETY EVALUATION**

### **A) DESCRIPTION OF PARAMETERS OF SAFETY EVALUATION**

Adverse event: Any untoward medical occurrence in a patient or clinical trial subject administered a medicinal product and which does not necessarily have a causal relationship with this treatment.

Life-threatening adverse event or life-threatening suspected adverse reaction: an adverse event or suspected adverse reaction is considered "life-threatening" if, in the view of either the investigator or Sponsor, its occurrence places the patient or subject at immediate risk of death.

Serious adverse event or serious suspected adverse reaction: any untoward medical occurrence or effect that at any dose results in any of the following outcomes: death, a life-threatening adverse event, inpatient hospitalization or prolongation of existing hospitalization, a persistent or significant incapacity or substantial disruption of the ability to conduct normal life functions, or a congenital anomaly or birth defect. Important medical events that may not result in death, be life-threatening, or require hospitalization may be considered serious when, based upon appropriate medical judgment, they may jeopardize the patient or subject and may require medical or surgical intervention to prevent one of the outcomes listed in this definition. Examples of such medical events include allergic bronchospasm requiring intensive treatment in an emergency room or at home, blood dyscrasias or convulsions that do not result in inpatient hospitalization, or the development of drug dependency or drug abuse.

Suspected adverse reaction: any adverse event for which there is a reasonable possibility that the drug caused the adverse event. "Reasonable possibility" means there is evidence to suggest a causal relationship between the drug and the adverse event. Suspected adverse reaction implies a lesser degree of certainty about causality than adverse reaction, which means any adverse event caused by a drug.

Unexpected adverse event or unexpected suspected adverse reaction. An adverse event or suspected adverse reaction is considered "unexpected" if it is not listed in the investigator brochure or is not listed at the specificity or severity that has been observed; or, if an investigator brochure is not required or available, is not consistent with the risk information described in the general investigational plan or elsewhere in the current application, as amended. "Unexpected," as used in this definition, also refers to adverse events or suspected adverse reactions that are mentioned in the investigator brochure as occurring with a class of drugs or as anticipated from the pharmacological properties of the drug, but are not specifically mentioned as occurring with the particular drug under investigation.

### **B). METHODS AND SCHEDULE OF SAFETY PARAMETERS MEASUREMENT, COLLECTION AND ANALYSIS**

#### **Steering committee.**

It is composed of the coordinating investigators (Prof Fermand/Prof Bridoux), of investigators (Prof Attal, Prof Combe, Prof Jaccard, Prof Moulin, Prof Moreau, Prof Ronco), of the biostatistician in charge of the project (Prof Sylvie Chevret), and of representatives of the Sponsor and of the Clinical Research Unit (Hôpital Saint Louis, Paris). The committee will define general organization, conduct of research and coordination of information. It will initially determine the methodology, decide appropriate



measures in case of unexpected events, and monitor the conduct of research with focus on tolerance and adverse events.

#### **Data and Safety Monitoring Board (DSMB):**

The DSMB will be composed of experts not involved in research: Prof Saudan (nephrologist), Prof Delforge (hematologist) specialized in the studied pathology, and Prof Benichou (Biostatistician). The committee will meet once during the first year of research, then twice a year. A report will be written after each meeting and will require approbation from all members of the DSMB. The report will be signed by the DSMB president and submitted to the Sponsor (Project manager DRCD). DSMB members are encouraged to keep a detailed record of the close meeting that will be available to DSMB members only.

The DSMB may issue the following recommendations:

- Continue research without modifications
- Premature interruption of research or temporary suspension of research (because of tolerance, efficacy or pertinence)
- Proposition of modification of the research protocol (criteria of inclusion and non-inclusion, follow-up, complementary investigations....)

Recommendations issued by the DSMB will be transmitted to the Sponsor. The project manager will inform the DSMB of the Sponsor's decisions and their implementation.

#### **Interim safety analysis.**

An interim safety analysis will be organized by the DSMB based on information provided by the study biostatistician (Prof Sylvie Chevret). It will be held 1 year after the date of the first randomization, or after randomization of 40 patients in the chemotherapy part of the study (patients not requiring hemodialysis) and 20 patients in the hemodialysis part of the study. The main objective will be the evaluation of the benefit to risk ratio of the study. To this aim, all adverse events and serious adverse events will be analyzed, as well as their accountability and all appropriate measures will be decided to guarantee the securing of subjects participating to the research.

#### ***C) PROCEDURES REGARDING REGISTRATION AND REPORTING OF ADVERSE EVENTS***

Adverse events should be recorded according to the above classification (see appendixes 3, 14, 16)

All adverse events occurring after the first dose of investigational product observed by the investigator or reported by the subject (whether or not attributed to investigational product), will be reported on the CRF. Any relevant clinical or para-clinical information that may help to describe the corresponding event will be reported. Medically significant adverse events considered related to the investigational product by the investigator or the sponsor will be followed until resolved or considered stable. The following attributes must be assigned by the investigator: description; dates of onset and resolution; severity; assessment of relatedness to investigational product, and action taken. The investigator may be asked to provide follow-up information.

Serious adverse events (SAE). Any serious adverse event, as defined above, will be immediately notified by the investigators to the Sponsor (APHP). Completed SAE report forms (see appendix 16) will be immediately sent by fax or telecopy to the Pharmacovigilance pole at the DRCD, (fax: 01 44 84 17 99). The Clinical Research Unit in Saint Louis Hospital (DBIM) in charge of research will be regularly informed through transmission of the SAE report forms. SAE will be reported to the Sponsor during the entire duration of administration of the experimental treatments and until 1 month after completion of treatment.

Data regarding SAE will be reported in the eCRF, which corresponding page will be printed and faxed to the DRCD as soon as possible, as requested by the law.

For each serious adverse event, the investigator will have to assess causality between the event and experimental and/or non-experimental treatment.

Information relative to the description and evaluation of an adverse event may be not obtained in the time allocated for the initial declaration. Thus, clinical follow-up data and results of clinical evaluation and of complementary diagnostic or laboratory investigations, or of any other information that may allow appropriate analysis of causality will be reported:

- either on the initial adverse event report form if information is readily available,
- or later and as soon as possible, by sending a novel completed SAE form by fax, specifying that it corresponds to the tracking of a declared SAE, and the tracking number.

All SAE reports by investigators should identify each participating patient by a single specific code number. In the event of the death of a participating patient, investigator will provide all relevant information to the Sponsor (hospitalization report, autopsy report...).

Any significant development during research or in the context of research, coming from data of the literature, or from other ongoing research, will be notified to the Sponsor.

Any pregnancy that would occur immediately after biomedical research will be immediately declared as a SAE to the Sponsor and specific follow-up will be organized until delivery.

#### **SAE reporting to Regulatory Authorities and Ethics Committee**

AE reporting will be undertaken by the « Pôle Vigilance » of DRCD, after evaluation of the AE severity, of the causality with experimental treatment and non-experimental treatment, and whether AE was expected or not. Unexpected AE will be reported by the Sponsor to competent regulatory authorities within legal declaration time:

- unexpected SAE responsible for death or vital threat: 7 days from the day of report to the Sponsor
- other unexpected SAE: within 15 days from the day of report to the Sponsor.

In the event of an unexpected SAE related to the research treatment or to research itself, all regulatory authorities, ethics committee, and research investigators will be informed.

#### ***D) MODALITIES AND DURATION OF SURVEILLANCE FOLLOWING THE OCCURRENCE OF ADVERSE EVENTS***

Any patient in whom an adverse event has occurred should undergo clinical surveillance until resolution or stabilization of the adverse event. All patients participating to the research will undergo full evaluation at 12 months.

#### ***E) MEASURES TO PREVENT PREGNANCY***

This paragraph does not apply to female subjects or to female partners of male patients aged more than 50 years and with amenorrhea for more than 1 year. It does not apply also to women with early menopause confirmed by a specialized gynecologist and to patients with a past history of gynecologic surgery (bilateral salpingectomy and ovariectomy or hysterectomy) or with congenital disorders (Mullerian agenesis, Turner syndrome).

In the other situations, a pregnancy risk cannot be definitely ruled out, which justifies the following:

- to perform a pregnancy test in case of any doubt in female patients who will receive bortezomib with or without cyclophosphamide, during initial evaluation and all along the follow-up period.

- female subjects of child bearing potential should agree to use and be able to comply with effective contraception without interruption, throughout the entire duration of study and for 3 months after the end of study.

- in the event of prescription of thalidomide, to comply with current rules regarding the use of thalidomide, which risk of teratogenicity is well established.

- *Before starting treatment:*

- complete information on the teratogenic risk of thalidomide and on the Pregnancy Prevention Program must be provided by the investigator to female subjects of child bearing potential, and, if appropriate, to male subjects.

- female subjects of child bearing potential should have a medically supervised pregnancy test with a minimum sensitivity of 25 mIU/ml on the day of the study visit or in the 3 days prior to the study visit when thalidomide is prescribed once the subject has been on effective contraception for at least 4 weeks. This requirement also applies to women of childbearing potential who practice complete and continued abstinence. The test should ensure the subject is not pregnant when she starts treatment with thalidomide.

- *Under treatment and after the end of study treatment*

Female subjects of child bearing potential should undergo a supervised pregnancy test every 4 weeks until 4 weeks after the end of study treatment, except in the case of confirmed tubal sterilization. These pregnancy tests should be performed on the day of the study visit or in the 3 days prior to the study visit. This requirement also applies to women of childbearing potential who practice complete and continued abstinence.

These recommendations are listed in the information material, which also includes a patient follow-up diary, pregnancy prevention and treatment follow-up measures, the patient package insert and a pregnancy report form delivered by the authorization holder (Celgene France).

#### **H) PROCEDURES OF BORTEZOMIB ADMINISTRATION (POOR TOLERANCE OR OTHER SITUATIONS)**

Bortezomib will be administered preferentially using the subcutaneous route (see appendix 13). The reconstituted solution of Velcade® 3.5 mg/ml is administered in thighs (left or right) or in the abdomen (left or right). The solution should be injected subcutaneously, using a 45 to 90 degree angle. It is recommended to alternate injection sites between each consecutive injection.

The I.V. route can be used in the following conditions: i) severe obesity, ii) severe oedema iii) local skin conditions contraindicating the use of the subcutaneous injections, iv) patient's refusal of subcutaneous injections.

An interval of 1 week should be observed before starting I.V. injections, in case of modification of the route of injection from S.C. to I.V.

#### **11. PROCEDURES OF TEMPORARY OR PERMANENT TREATMENT INTERRUPTION**

Interruption of the experimental treatment will be at the investigator's judgment, if justified by patient's interest. Causes of premature treatment interruption are serious adverse event (toxicity/tolerance) or inefficacy, leading to the introduction of treatment other than that patient received at the time of inclusion, or if the result of complementary investigations makes it necessary to stop the study. Clinical monitoring will be pursued as planned in the study design and patient data will be recorded. If treatment is stopped because of toxicity, a SAE will be declared and clinical monitoring will be maintained until resolution.

Subjects may withdraw their consent to participate in this study at any time without prejudice. The investigator must withdraw from the study any subject who requests to be withdrawn. A subject's

participation in the study may be discontinued at any time at the discretion of the investigator in accordance with his/her clinical judgment. The Sponsor should be notified in a timely manner of all subject discontinuations. If asked by the subject, none of his own data will be used for research.

According to circumstances, the Sponsor (Assistance Publique-Hôpitaux de Paris) and/or regulatory authorities may decide to prematurely end the research, in the event of a modification of expected benefit over risk ratio, or because of novel data regarding the experimental treatment that may compromise patient security, or in case of a major protocol deviation.

## **12. CASE REPORT FORM**

Data regarding research will be collected and monitored using the CleanWEB electronic CRF, according to the public contract concluded between AP-HP and TELEMEDICINE TECHNOLOGIES S.A. on November 17, 2003 (reference N° 033845) and renewed on November 21, 2006 (reference N° 063844). Data will be centralized on a server hosted by the Département des Services Opérationnels (DSO) of AP-HP, 67 boulevard Bessières, 75017 PARIS. Data will be collected in eCRF after each clinical visit by local investigators. Access will be restricted to each investigator by a personal access code and password. Each investigator will be attributed a specific profile that will allow access to part or entire system functionalities (from data entry or visualization to full access to whole study data, or ability to modify and validate data by clinical research assistants, etc...). Data storage will be done on a secure server, providing data encryption during transmission and automatic internal save on the server hosting the eCRF.

## **13. ETHICAL CONSIDERATIONS**

### Role of the study Sponsor

In accordance with the law of the French Public Health (law n°2004-806 of 9 August 2004), Assistance Publique-Hôpitaux de Paris (APHP) will be the Sponsor of the research study. The Regional Delegation for Clinic Research (Délégation Régionale à la Recherche Clinique) will monitor regulatory issues and have a decision-making role, in compliance with article L 1121-1 of the French Code of Public Health. Assistance Publique-Hôpitaux de Paris reserves the right to interrupt research at any time for medical or administrative reasons; in this event, the decision will be notified to the investigator.

### Submission of the protocol to the Ethics Committee

In accordance with article L.1123-6 French Code of Public Health, the research protocol will be submitted (along with insurance certificate and receipt) to the Comité Consultatif de Protection des Personnes en Recherche Biomédicale-Ile de France, after approval of the project Sponsor. The decision of the committee will be notified in the form addressed by the study Sponsor to competent regulatory authority before the beginning of the study.

### Authorization from the Agence Française de Sécurité Sanitaire des Produits de Santé (Afssaps) - French Agency for Health and Safety of Health Products.

Assistance Publique-Hôpitaux de Paris, as the study Sponsor, must obtain authorization from Afssaps for biomedical research on medicinal product for human use prior to the implementation of research, within its competences and in accordance with regulatory and legal measures in force.

### Declaration to the National Commission for Data Protection and Liberties (CNIL-France)

The legislation provides that the declaration should have been filed before the effective beginning of the research.

### Research documentation

Before starting research, the coordinating investigator and all study investigators will provide a signed up-to-date curriculum-vitæ as well as their registration number to the French National Medical Council (CNOM). The accepted submitted protocol version and its appendixes will be signed by the

coordinating investigator, the Sponsor representative and, if applicable, by the scientific manager. Each novel protocol version, updated after amendments and/or request from regulatory authorities, will be attributed a novel number, with updated date of issue, and same signatures will be obtained. The investigator and the Sponsor will ensure that the study is conducted in full compliance with the "Declaration of Helsinki" ICH guidelines (<http://private.ich.org/LOB/media/MEDIA482.pdf>), with the ICH Good Clinical Practice Guideline, and with the French laws and regulations to afford the greater protection to the subjects participating to the study. To this end, a signed scientific agreement from each investigator in each participating center will be delivered to the study Sponsor.

#### **14. DATA PROCESSING AND STORAGE**

##### Data transcription

Investigators participating in the study should submit all required information for each enrolled subject using the eCRF. An explanation should be given for missing data. Clinical and para-clinical data should be transferred in the eCRF as soon as they are collected.

Incorrect data identified in the eCRF will be replaced by a declared investigator, who will access the Cleanweb system using personal identification code and password. These codes are strictly confidential and can by no means be communicated to a third party; they contribute to secure data confidentiality and to authenticate interventions. Access codes are associated with an electronic signature system which validates data entered by the investigator. Each signature is time stamped and registered in the research "Audit trail". Signed data cannot be modified, but the investigator can cancel his signature if data need to be modified. Signature annulation is also recorded and time stamped.

Anonymity of participating subjects will be secured by the mention of only patient number and initials in all documents relative to research and by masking of individual-related data on source documents, by any appropriate mean. Electronic data file will be declared to CLIN-France, according to adapted procedure.

Clinical research assistants, project manager, assistant project manager, clinical trial coordinator of the Clinical Research Unit, and data manager will have habilitation to visualize CRF and to ask queries to investigators.

##### Protocol amendments

The Department of Clinical Research and Development (DRCD) should be informed from any modification of the study by the coordinating investigator. Modifications should be qualified as substantial or non-substantial. Any amendment to the research protocol must be notified to the Ethics Committee if it includes substantial modifications, i.e. that may in one way or another modify guarantees to persons participating to the biomedical research (modification of inclusion criteria, prolongation of the inclusion period, participation of additional investigators....).

##### Extension of research

Any extension of the research protocol (significant modification of the treatment schedule or of studied populations, prolongation of research treatment or medical actions not initially intended) should be considered as new research.

##### Retention of records

In accordance with regulations for Biomedical Research Involving Human Subjects, investigators are required to maintain all study documentation, including documents created or modified in electronic format, for at least 15 years following the completion of the study.

Indexed archiving includes:

- All successive versions of the study protocol (identified by specific number and date of issue).
- By the coordinating investigator: certificates of authorization by regulatory authorities and ethics committee approval for the corresponding research.
- All correspondence with the Sponsor
- Signed Informed Consent Form (ICF) from each subject participating to the research (under sealed envelope for minor child with signed consent of the person who has parental authority) with the corresponding list or registry of inclusions.
- Completed and validated paper copy of the CRF from each included participating subject, dated and signed by the coordinating investigator or the local investigator.
- Audit trail.
- Data Handling Manual, with accurate description of eCRF (data, monitoring....).
- All ancillary documents specifically relevant to research.
- The final research report after statistical analysis and quality control (with copy sent to the study Sponsor). During the closing visit to each participating center, clinical research assistants will make a CD-ROM copy of the following: pdf files of eCRF from each patient included in the centre, randomization fax, all correspondence related to research, the audit trail and electronic correction queries. This CD-ROM will be archived in the investigator site file.

The database used for statistical analysis should be also archived by the statistician in charge of final analysis (paper support or electronic file).

## **15. ACCESS RIGHTS AND SOURCE DOCUMENTS**

In accordance with applicable laws and regulations, particularly articles L.1121-3 and R.5121-13 of the French Public Health Code, authorized persons (including investigators, persons in charge of quality control, data monitors, clinical research assistants, auditors, and all persons collaborating to the trial) are required to take all measures necessary to guarantee confidentiality of all information regarding experimental treatments, clinical trial, identity of participating subjects, and results of research. All data collected by these persons during quality controls or audits will remain anonymous.

## **16. QUALITY CONTROL AND ASSURANCE**

Quality control and assurance will be performed by a clinical research assistant specifically recruited for this trial. Research will be framed under the Sponsor's Standard Operating Procedure (SOP). Research and management of patients in each participating center will be conducted in compliance with the principles of the Declaration of Helsinki and with Good Clinical Practice Guidelines. The Sponsor's representatives will organize regularly visits to participating centers, according to the schedule of patient follow-up visits as defined in the study protocol, to the inclusion rate and to the protocol risk assessment.

During subsequent visits, case report files will be reviewed according to the progression of research, by clinical research assistants representing the Sponsor who will control the accuracy of data reporting and validate CRF. Primary investigator and associate investigators in each center, involved in the inclusion and follow-up of participating subjects, must consent to regularly meet the Sponsor's

representatives designated by APHP. During these on-site visits and in accordance with Good Clinical Practice Guidelines, the following items will be checked:

- Compliance with the research protocol and related procedures.
- Verification of source documents and confrontation with data reported in the CRF.
- Quality assurance of data reported in the CRF: accuracy, missing data, data consistency, in accordance with the protocol procedures.

## **17. FUNDING AND INSURANCE**

Funding is provided according to the budget obtained by the Program Hospitalier de Recherche Clinique. Assistance Publique-Hôpitaux de Paris is the Sponsor of the present research in France. The Sponsor Assistance Publique-Hôpitaux de Paris has purchased insurance with the HGIGERLING company through BIOMEDIC-INSURE for the entire duration of the study, which guarantees its own civil liability as well as that of all persons involved in the conduction of research (medical and non-medical contributors) (law N° 2004-806 Art. L 1121-10 of the French Public Health Code). Address: Parc d'Innovation Bretagne Sud C. P. 142 56038 Vannes Cedex, France.

## **18. FINAL RESEARCH REPORT**

In accordance with the article R1123-60 of the French Public Health Code, the final research report is established and signed by the Sponsor and the Coordinating Investigator. A report written in compliance with the reference plan of the competent regulatory authority should be transmitted to the regulatory authority and to the Ethics Committee within the first year following the end of the research, which corresponds to the end of the participation of the last subject enrolled onto the research protocol.

## **19. DATA PUBLICATION RULES AND INTELLECTUAL PROPERTY RIGHTS**

Assistance Publique-Hôpitaux de Paris (AP-HP) retains ownership of all data related to the study. None of these data cannot be used or transmitted to a third party without the prior expressed consent of APHP. AP-HP must be identified as the financial sponsor where appropriate. The terms « Assistance Publique-Hôpitaux de Paris » must appear in the authors address. The final publication of the study should be sent for approval to all contributors before submission. According to the rate of patient recruitment in the study, contributors will be included in the author list.



## 20. REFERENCES

1. Badros A, Barlogie B, Siegel E, et al. Results of autologous stem cell transplant in multiple myeloma patients with renal failure. *Br J Haematol* 2001; 114: 822-829.
2. Bachmann U, Schindler R, Storr M, Kahl A, Joerres A, Sturm I. Combination of bortezomib-based chemotherapy and extracorporeal free light chain removal for treating cast nephropathy in multiple myeloma. *Nephrol Dial Transplant* 2008. doi: 10.1093/ndtplus/sfm 053.
3. Batuman V. Proximal tubular injury in myeloma. *Contrib Nephrol* 2007; 153: 87-104.
4. Bellono R, Ronco C, Kellum JA, Mehta RL, Palevsky P and the ADQI workgroup. Acute renal failure – definition, outcome measures, animal models, fluid therapy and information technology needs: the Second International Consensus Conference of the Acute Dialysis Quality Initiative (ADQI) Group. *Crit Care* 2004; 8: R204-R212.
5. Birn H, Christensen EI. Renal albumin absorption in physiology and pathology. *Kidney Int* 2006; 69: 440-449.
6. Bladé J, Fernandez-Llama P, Bosch F, et al. Renal failure in multiple myeloma: presenting features and predictors of outcome in 94 patients from a single institution. *Arch Intern Med* 1998; 158: 1889-1893.
7. Chanan-Khan AA, Kaufman JL, Mehta J, et al. Activity and safety of bortezomib in multiple myeloma patients with advanced renal failure: a multicenter retrospective study. *Blood* 2007; 109: 2604-2610.
8. Clark WF, Stewart AK, Rock GA, et al. Plasma exchange when myeloma presents as acute renal failure. *Ann Intern Med* 2005; 143: 777-784.
9. Cohen DJ, Sherman WH, Osserman EF, Appel GB. Acute renal failure in patients with multiple myeloma. *Am J Med* 1984; 76: 247-256.
10. Davies FE, Wu P, Jenner M, Srikanth M, Saso R, Morgan GJ. The combination of cyclophosphamide, velcade and dexamethasone induces high response rates with comparable toxicity to velcade alone and velcade plus dexamethasone. *Haematologica*. 2007; 92: 1149-1150.
11. Eknoyan G, Beck GJ, Cheung AK, et al. Effect of dialysis dose and membrane flux in maintenance hemodialysis. *N Engl J Med* 2002; 347: 2010-2019.
12. Durie BG, Harousseau JL, Miguel JS, et al. International uniform response criteria for multiple myeloma. *Leukemia* 2006; 20: 1467-1473.
13. Facon T, Mary JY, Hulin C, et al. Melphalan and prednisone plus thalidomide versus melphalan and prednisone alone or reduced-intensity autologous stem cell transplantation in elderly patients with multiple myeloma (IFM 99-06): a randomised trial. *Lancet*. 2007; 370: 1209-1218.
14. Fakhouri F, Guerraoui H, Presne C, et al. Thalidomide in patients with multiple myeloma and renal failure. *Br J Haematol* 2004; 125: 96-97.
15. Haubitz M, Peest D. Myeloma - new approaches to combined nephrological-haematological management. *Nephrol Dial Transplant* 2006; 21: 582-590.
16. Hutchison CA, Cockwell P, Reid S, et al. Efficient removal of immunoglobulin free light chains by hemodialysis for multiple myeloma: in vitro and in vivo studies. *J Am Soc Nephrol* 2007; 18: 886-895.
17. Hutchison CA, Bradwell AR, Cook M, et al. Treatment of acute renal failure secondary to multiple myeloma with chemotherapy and extended high cut-off hemodialysis. *Clin J Am Soc Nephrol* 2009; 4: 745-754.
18. Jagannath S, Barlogie B, Berenson JR et al. Bortezomib in recurrent and/or refractory multiple myeloma. Initial clinical experience in patients with impaired renal function. *Cancer*. 2005; 103: 1195-1200.
19. Kastritis E, Agnastopoulos A, Roussou M, et al. Reversibility of renal failure in newly diagnosed multiple myeloma patients treated with high dose dexamethasone-containing regimens and the impact of novel agents. *Haematologica* 2007; 92: 546-549.
20. Knudsen LM, Hjorth M, Hippe E. Renal failure in multiple myeloma: reversibility and impact on the prognosis. Nordic Myeloma Study Group. *Eur J Haematol* 2000; 65: 175-181.
21. Knudsen LM, Nielsen B, Gimsing P, Geisler C. Autologous stem cell transplantation in multiple myeloma: outcome in patients with renal failure. *Eur J Haematol*. 2005; 75: 27-33.
22. Kropff M, Liebisch P, Knop S, et al. DSMM XI study: dose definition for intravenous cyclophosphamide in combination with bortezomib/dexamethasone for remission induction in patients with newly diagnosed myeloma. *Ann Hematol*. 2009; 88: 1125-1130.
23. Kyriakou C, Thomson K, D'Sa S, et al. Low-dose thalidomide in combination with oral weekly cyclophosphamide and pulsed dexamethasone is a well tolerated and effective regimen in patients with relapsed and refractory multiple myeloma. *Br J Haematol*. 2005; 129: 763-770.
24. Lee CK, Zangari M, Barlogie B, Fassas A, et al. Dialysis-dependent renal failure in patients with myeloma can be reversed by high-dose myeloablative therapy and autotransplant. *Bone Marrow Transplant*. 2004; 33: 823-828.



25. Leung N, Gertz MA, Zeldenrust SR, et al. Improvement of cast nephropathy with plasma exchange depends on the diagnosis and on reduction of serum free light chains. *Kidney Int* 2008; 73: 1211-1213.
26. Li M, Hering-Smith KS, Simon EE, Batuman V. Myeloma light chains induce epithelial-mesenchymal transition in human renal proximal tubule epithelial cells. *Nephrol Dial Transplant* 2008; 23: 860-870.
27. Ludwig H, Drach J, Graf H, Lang A, Meran JG. Reversal of acute renal failure by bortezomib-based chemotherapy in patients with multiple myeloma. *Haematologica* 2007; 92: 1411-1414.
28. Mateos MV, Hernandez JM, Hernandez MT, et al. Bortezomib plus melphalan and prednisone in elderly untreated patients with multiple myeloma: results of a multicenter phase 1/2 study. *Blood* 2006; 108: 2165-2172.
29. Mehta RL, Kellum JA, Shah SV, et al. Report of an initiative to improve outcomes in acute kidney injury. *Crit Care* 2007; 11: R31.
30. Moreau P, Pylypenko H, Grosicki S, et al. Subcutaneous versus intravenous administration of bortezomib in patients with relapsed multiple myeloma: a randomized, phase 3, non-inferiority study. *Lancet Oncol* 2011; 12: 431-440.
31. Pirani CL, Silva F, D'Agati V, Chander P, Striker LM. Renal lesions in plasma cell dyscrasias: ultrastructural observations. *Am J Kidney Dis* 1987; 10: 208-221.
32. Rayner HC, Haynes AP, Thompson JR, Russel N, Fletcher J. Perspectives in multiple myeloma: survival, prognostic factors and disease complications in a single centre between 1975 and 1988. *Q J Med* 1991; 79: 517-525.
33. Reeder CB, Reece DE, Kukreti V, et al. Cyclophosphamide, bortezomib and dexamethasone induction for newly diagnosed multiple myeloma: high response rates in a phase II clinical trial. *Leukemia*. 2009; 23: 1337-1341.
34. Ronco PM, Aucouturier P, Mougenot B. Monoclonal gammopathies: multiple myeloma, amyloidosis, and related disorders. In : Schrier, Gottschalk. *Diseases of the Kidney*, 2001: 2205-2253
35. Rota S, Mougenot B, Baudouin B, et al. Multiple myeloma and severe renal failure: a clinicopathologic study of outcome and prognosis in 34 patients. *Medicine (Baltimore)* 1987; 66: 126-137.
36. Sakhuja V, Jha V, Varma S, et al. Renal involvement in multiple myeloma: a 10-year study. *Ren Fail* 2000; 22: 465-477.
37. San Miguel JF, Richardson PG, Sonneveld P, et al. Efficacy and safety of bortezomib in patients with renal impairment: results from the APEX phase 3 study. *Leukemia* 2008; 22: 842-849.
38. San Miguel JF, Schlag R, Khuageva NK, et al. Bortezomib plus melphalan and prednisone for initial treatment of multiple myeloma. *N Engl J Med* 2008; 359: 906-917.
39. Sanders PW, Booker BB. Pathobiology of cast nephropathy from human Bence Jones proteins. *J Clin Invest* 1992; 89: 630-639.
40. Sidra G, Williams CD, Russell NH, Zaman S, Myers B, Byrne JL. Combination chemotherapy with cyclophosphamide, thalidomide and dexamethasone for patients with refractory, newly diagnosed or relapsed myeloma. *Haematologica* 2006; 91: 862-863.
41. Tosi P, Zamagni E, Cellini C, et al. Thalidomide alone or in combination with dexamethasone in patients with advanced, relapsed or refractory multiple myeloma and renal failure. *Eur J Haematol* 2004; 73: 98-103.

## APPENDIX 1. Evaluation of renal function

### MDRD (Modification of Diet in Renal Disease) – simplified equation:

1. If serum creatinine is measured using the Jaffé colorimetric assay:

Estimated GFR (ml/min/1.73m<sup>2</sup>): **186, 3** x [serum creatinine (mg/dl)]<sup>-1.154</sup> x [age (years)]<sup>-0.203</sup> x 0.742 (if female) x 1.212 (if black).

- 2.: If serum creatinine is measured using an enzymatic assay

Estimated GFR (ml/min/1.73m<sup>2</sup>): **175** x [serum creatinine (mg/dl)]<sup>-1.154</sup> x [age (years)]<sup>-0.203</sup> x 0.742 (if female) x 1.212 (if black).

### Cockcroft and Gault equation:

Creatinine clearance, ml/min: 
$$\frac{[140 - \text{age (years)}] \times \text{body weight (kgs)} \times K}{\text{Serum creatinine } (\mu\text{mol/l})}$$

K = 1.23 if male, 1.04 if female

**APPENDIX 2. AKIN (Acute Kidney Injury Network) classification/staging system for acute kidney injury**

| Stage    | Serum creatinine criteria                                                                                                                                                                                   | Urine output criteria                                      |
|----------|-------------------------------------------------------------------------------------------------------------------------------------------------------------------------------------------------------------|------------------------------------------------------------|
| <b>1</b> | Increase in serum creatinine of $\geq$ to 0.3 mg/dl (26.4 $\mu$ mol/l) or increase to $\geq$ 150 to 200 % (1.5- to 2-fold) from baseline                                                                    | Less than 0.5 ml/kg/h for more than 6 hours                |
| <b>2</b> | Increase in serum creatinine to more than 200 to 300% (> 2- to 3-fold) from baseline                                                                                                                        | Less than 0.5 ml/kg/h for more than 12 hours               |
| <b>3</b> | Increase in serum creatinine to more than 300% (> 3-fold) from baseline, or serum creatinine of $\geq$ to 4.0 mg/dl ( $\geq$ 354 $\mu$ mol/l) with an acute increase of at least 0.5 mg/dl (44 $\mu$ mol/l) | Less than 0.3 ml/kg/h for 24 hours, or anuria for 12 hours |

From Mehta RL, Kellum JA, Shah SV, et al. Report of an initiative to improve outcomes in acute kidney injury. Crit Care 2007; 11: R31.

Only one criterion (serum creatinine or urine output) has to be fulfilled to qualify for a stage.

According to the recommendations of the ADQI workgroup (Bellono 2004), in patients in whom a baseline serum creatinine is unknown, it is possible to calculate a theoretical baseline serum creatinine value assuming a given normal GFR. By normalizing the GFR to the body surface area, a GFR of approximately 75 to 100 ml/min per 1.73 m<sup>2</sup> can be assumed. Thus, for a given patient, a baseline serum creatinine value can be calculated assuming a value of baseline GFR of 75 ml/min/1.73m<sup>2</sup>, using the simplified “modification of diet in renal disease” (MDRD) formula, which provides a robust estimate of GFR relative to serum creatinine based on age, race and sex.

### APPENDIX 3. Common Terminology Criteria for Adverse Events

For both AE and SAE, the investigator(s) must assess the severity of the event. The severity of the adverse events (AEs) will be graded on a scale of 1 to 5 according to the National Cancer Institute (NCI) Common Terminology Criteria for Adverse Events Version 4.0 (NCI CTCAE). The NCI CTCAE V4.0 can be viewed on-line at the following NCI web site: <http://ctep.cancer.gov/reporting/ctc.html>.

If a specific event is not included in the NCI CTCAE toxicity scale, the following scale should be used to grade the event

| Grade | Definition                                                                                                                                                                         |
|-------|------------------------------------------------------------------------------------------------------------------------------------------------------------------------------------|
| 1.    | <b>Mild:</b> Awareness of sign, symptom, or event, usually transient, requiring no special treatment and generally not interfering with usual daily activities                     |
| 2.    | <b>Moderate:</b> Discomfort that causes interference with usual activities; usually ameliorated by basic therapeutic manoeuvres                                                    |
| 3.    | <b>Severe:</b> Incapacitating with inability to do usual activities or significantly affects clinical status and warrants intervention. Hospitalization may or may not be required |
| 4.    | <b>Life-threatening:</b> Immediate risk of death; requires hospitalization and clinical intervention                                                                               |
| 5.    | <b>Death</b>                                                                                                                                                                       |

#### Classification of relationship/causality of adverse events (SAE/AE) to study drug

The investigator(s) must determine the relationship between the administration of study drug and the occurrence of an AE/SAE as “Not suspected” or “Suspected” as defined below:

Not suspected: The temporal relationship of the adverse event to study drug administration makes a causal relationship unlikely or remote, or other medications, therapeutic interventions, or underlying conditions provide a sufficient explanation for the observed event.

Suspected: The temporal relationship of the adverse event to study drug administration makes a causal relationship possible, and other medications, therapeutic interventions, or underlying conditions do not provide a sufficient explanation for the observed event.

#### **APPENDIX 4. Haematological response criteria**

**Partial Response (PR)**, all of the following:

- $\geq 50\%$  reduction in involved free light chain (LC) serum level.
- Parallel improvement of the serum kappa/lambda ratio.
- Reduction in the level of monoclonal entire Ig, if present
- Reduction in the involved LC urine excretion
- No evidence of any sign of disease progression (i.e. new soft tissue plasmacytoma, new lytic bone lesions, hypercalcemia).

**Very Good Partial Response (VGPR)**, all of the following:

- $\geq 90\%$  reduction in involved serum free light chain (LC) level.
- Parallel improvement of the serum kappa/lambda ratio.
- Serum monoclonal Ig (if present) and urine monoclonal LC detectable by immunofixation but not on electrophoresis
- No evidence of any sign of disease progression (i.e. development of lytic bone lesions or soft tissue plasmacytoma, or hypercalcemia).

**Complete Response (CR)**, all of the following:

- Negative immunofixation of the serum and urine monoclonal Ig
- Normal serum kappa/lambda ratio
- $< 5\%$  plasma cells in bone marrow (by aspiration or bone marrow if needed)
- No evidence of any sign of disease progression (i.e. development of lytic bone lesions or soft tissue plasmacytoma, or hypercalcemia).

**Progressive Disease (PD), or relapse**, at least one of the following:

- Increase of  $\geq 25\%$  from baseline in:
  - involved serum free light chain (LC) level, with parallel change in serum kappa/lambda ratio
  - serum level of entire monoclonal Ig, if present
  - % of bone marrow plasma cell infiltration (the absolute % must be  $\geq 10\%$ )
- Confirmed development of new lytic bone lesions or soft tissue plasmacytomas or confirmed increase in the size of existing bone lesions or soft tissue plasmacytomas.
- Development of hypercalcemia (corrected serum calcium  $> 11.5$  mg/dl or 2.65 mmol/l) than can be attributed solely to the plasma cell proliferative disorder.

**Relapse from complete remission**, at least one of the following:

- Reappearance of the serum or urine monoclonal Ig, detectable by immunofixation or electrophoresis
- Reappearance of an abnormal serum free LC level
- Reappearance of  $\geq 5\%$  dystrophic plasma cells on bone marrow aspiration
- Any other sign of disease progression

**Stable Disease (SD): not meeting criteria for PR, VGPR, CR, PD or relapse**

Adapted from Durie BGM et al. International uniform response criteria for multiple myeloma. *Leukemia* 2006; 20: 1467-1473.

## APPENDIX 5. C-VTD regimen

### C-VTD (Cyclophosphamide + Bortezomib + Thalidomide+ Dexamethasone)

- Cyclophosphamide: 600 mg/m<sup>2</sup> through a short IV infusion on day 1. In patients requiring dialysis support, cyclophosphamide should be given at the end of a dialysis session.
- Bortezomib 1.3 mg/m<sup>2</sup> (S.C. or I.V.) **twice** a week for 2 weeks (days 1 and 8), followed by a 13-day period without treatment (days 9-21).
- Thalidomide: a daily single dose of 50 mg/day, given orally every evening for 15 days. If the treatment is well tolerated, thalidomide dose will be increased of 50 mg/day every 15 days, up to a daily dose of 100 mg.
- Dexamethasone 20 mg/day in the morning of days 1, 2, and 8, 9, i.e. on the day and the day after each injection of bortezomib. In case of gastro-intestinal symptoms (vomiting) steroid therapy should be administrated IV (for example, by substituting dexamethasone 20 mg by Solumedrol 200 mg).

**APPENDIX 6: Durie Salmon and ISS staging systems for multiple myeloma.**

| Stage      | Durie-Salmon                                                                                                                                                                                                               | ISS                                                           |
|------------|----------------------------------------------------------------------------------------------------------------------------------------------------------------------------------------------------------------------------|---------------------------------------------------------------|
| <b>I</b>   | All of the following present:<br>- Hb>10 g/dL<br>- Serum IgG <50 g/L<br>- Serum IgA <30 g/L<br>- Normal serum calcium (<3 mmol/l)<br>- No generalized lytic bone lesions<br>- Urine monoclonal protein excretion < 4 g/day | Serum beta2-microglobulin <3.5 mg/l and serum albumin >35 g/l |
| <b>II</b>  | Neither stage I nor stage III                                                                                                                                                                                              | Neither stage I nor stage III                                 |
| <b>III</b> | One or more of the following:<br>- Hb< 8.5 g/dl<br>- Serum IgG >70 g/l<br>- Serum IgA >50 g/l<br>- Serum calcium >3 mmol/l<br>- Advanced lytic bone lesions<br>- Urine monoclonal protein excretion >12 g/day              | Serum Beta2-microglobulin>5.5 mg/l                            |
| <b>A</b>   | Serum creatinine <20 mg/l (177 µmol/l)                                                                                                                                                                                     |                                                               |
| <b>B</b>   | Serum creatinine >20 mg/l (177 µmol/l)                                                                                                                                                                                     |                                                               |

## APPENDIX 7: Eastern Cooperative Oncology Group (ECOG) performans status

| Grade | Eastern Cooperative Oncology Group                                                                                                                        |
|-------|-----------------------------------------------------------------------------------------------------------------------------------------------------------|
| 0     | Fully active, able to carry on all pre-disease performance without restriction                                                                            |
| 1     | Restricted in physically strenuous activity but ambulatory and able to carry out work of a light or sedentary nature, e.g., light house work, office work |
| 2     | Ambulatory and capable of all selfcare but unable to carry out any work activities. Up and about more than 50% of waking hours                            |
| 3     | Capable of only limited selfcare, confined to bed or chair more than 50% of waking hours                                                                  |
| 4     | Completely disabled. Cannot carry on any selfcare. Totally confined to bed or chair                                                                       |
| 5     | Dead                                                                                                                                                      |

From Oken MM, Creech RH, Tormey DC, et al. Toxicity and response criteria of the Eastern Cooperative Oncology group. Am J Clin Oncol 1982; 5: 649-655



**APPENDIX 8: New York Heart Association (NYHA) functional classification system for congestive heart failure.**

- Class I: patients with cardiac disease but without resulting limitation of physical activity. Ordinary physical activity does not cause undue fatigue, palpitation, dyspnoea, or angina pain.
- Class II: patients with cardiac disease resulting in slight limitation of physical activity. They are comfortable at rest. Ordinary physical activity results in fatigue, palpitation, dyspnoea, or angina pain.
- Class III: patients with cardiac disease resulting in marked limitation of physical activity. They are comfortable at rest. Less than ordinary physical activity causes fatigue, palpitation, dyspnoea, or angina pain.
- Class IV: patients with cardiac disease resulting in inability to carry on any physical activity without discomfort. Symptoms of heart failure or the anginal syndrome may be present even at rest. If any physical activity is undertaken, discomfort is increased.

## APPENDIX 9. List of participating centres

| N° centre | SITE | Centre                                                   | Investigateur principal | Adresse                                                                                                 |
|-----------|------|----------------------------------------------------------|-------------------------|---------------------------------------------------------------------------------------------------------|
| 2         | AMN  | CHU Amiens groupe hospitalier SUD (néphro)               | Pr CHOUKROUN            | Service de Néphrologie<br>Hopital Sud<br>Avenue Laënnec - Salouël<br>80054 <b>AMIENS</b> Cedex 1        |
| 3         | AMN  | CHU Amiens groupe hospitalier SUD (hémato)               | Dr ROYER                | Service d'Hématologie<br>Hopital Sud<br>124 Rue Camille Desmoulins<br>80054 <b>AMIENS</b> Cedex 1       |
| 4         | ANG  | CHU Angers Hôpital Hotel Dieu (néphro)                   | Dr AUGUSTO              | Service de Néphrologie-Dialyse-<br>Transplantation<br>CHU Angers<br>4 rue Larrey<br>49000 <b>ANGERS</b> |
| 5         | ANG  | CHU Angers Hôpital Hotel Dieu (hémato)                   | Dr DIB                  | Service d'Hématologie<br>CHU Angers<br>4 rue Larrey<br>49000 <b>ANGERS</b>                              |
| 6         | AVC  | Hôpital AVICENNE (hémato)                                | Dr BRECHIGNAC           | Service d'Hématologie<br>Hôpital Avicenne<br>125, rue de Stalingrad<br>93009 <b>BOBIGNY</b> Cedex       |
| 61        | SLS  | Hôpital St Louis référent néphro pour l'Hôpital AVICENNE | Pr PERALDI              | Service de Néphrologie<br>Hôpital St Louis<br>1 Av Claude Vellefaux<br>75010 <b>PARIS</b>               |
| 7         | BSC  | CHU Besançon Hôpital Saint Jacques (néphro)              | Pr CHALOPIN             | Service de Néphrologie<br>hôpital Saint Jacques<br>2 pl St Jacques<br>25030 <b>BESANCON</b> Cedex       |
| 8         | BSC  | CHU Besançon Hôpital Jean Minjoz (hémato)                | Pr DECONINCK            | Service d'Hématologie<br>Hôpital Jean Minjoz<br>3, bd Alexandre Fleming<br>25030 <b>BESANCON</b> Cedex  |

|    |     |                                                               |            |                                                                                                        |
|----|-----|---------------------------------------------------------------|------------|--------------------------------------------------------------------------------------------------------|
| 9  | BCH | CHU Bichat (néphro)                                           | Pr DAUGAS  | Service de Néphrologie<br>Hôpital Bichat<br>46, rue Henri-Huchard<br>75877 <b>PARIS</b> Cedex 18       |
| 1  | SLS | Hôpital St Louis,<br>réfèrent hémato pour le<br>CHU de Bichat | Pr FERMAND | Service d'hématologie<br>Hôpital St Louis<br>1 Av Claude Vellefaux<br>75010 <b>PARIS</b>               |
| 10 | BDX | CHU Bordeaux<br>(nephro)                                      | Pr COMBE   | Service de Néphrologie<br>Hôpital Pellegrin<br>place Amélie Raba-Léon<br>33076 <b>BORDEAUX</b> Cedex   |
| 11 | BDX | CHU Bordeaux<br>(hémato)                                      | Pr MARIT   | Service d'Hématologie<br>CHU Bordeaux<br>Hopital Haut Leveque<br>Av de Magellan<br>33604 <b>PESSAC</b> |
| 13 | BRS | CHU Brest Hôpital<br>Morvan (nephro)                          | Pr LEMEUR  | Service de Néphrologie<br>CHU site de la Cavale Blanche<br>bd Tanguy Prigent<br>29200 BREST            |
| 12 | BRS | CHU Brest Hôpital<br>Morvan (hémato)                          | Pr BERTHOU | Service d'Hématologie<br>CHU Morvan<br>5 av Foch<br>29609 <b>BREST</b> Cedex                           |
| 14 | CAE | CHU Caen (hémato)                                             | Dr MACRO   | Service d'Hématologie<br>CHU Caen<br>Av Georges Clemenceaux<br>14033 <b>CAEN</b> Cedex 05              |
| 15 | CAE | CHU Caen (néphro)                                             | Dr FICHEUX | Service de Néphrologie<br>CHU Caen<br>Av Georges Clemenceaux<br>14033 <b>CAEN</b> Cedex 05             |

|    |     |                                                               |               |                                                                                                                                |
|----|-----|---------------------------------------------------------------|---------------|--------------------------------------------------------------------------------------------------------------------------------|
| 16 | CCH | CHU Cochin (héματο)                                           | Pr BOUSCARY   | Service d'Hématologie<br>Hôpital Cochin<br>27 rue du Faubourg St<br>Jacques<br>75679 <b>PARIS</b> Cedex 14                     |
| 17 | NCK | CHU Necker référent<br>néphro pour le CHU de<br>Cochin        | Pr KNEBELMANN | Service néphrologie<br>Hôpital de Necker<br>149 rue de Sèvres<br>75015 <b>PARIS</b>                                            |
| 20 | FRD | CHU Clermont-Ferrand<br>Hôpital Gabriel<br>Montpied (héματο)  | Pr BAY        | Service d'Hématologie<br>CHU Gabriel Montpied<br>56 rue Montalembert<br>BP 69<br>63003 <b>CLERMONT-FERRAND</b><br>Cedex        |
| 18 | FRD | CHU Clermont-Ferrand<br>Hôpital Gabriel<br>Montpied (rhumato) | Pr SOUBRIER   | Service de Rhumatologie<br>CHU Gabriel Montpied<br>56 rue Montalembert<br>BP 69<br>63003 <b>CLERMONT-FERRAND</b><br>Cedex      |
| 19 | FRD | CHU Clermont-Ferrand<br>Hôpital Gabriel<br>Montpied (néphro)  | Dr HENG       | Service de Néphrologie<br>CHU Gabriel Montpied<br>56 rue Montalembert<br>BP 69<br>63003 <b>CLERMONT-FERRAND</b><br>Cedex       |
| 21 | DJN | CHU Dijon Hôpital du<br>Bocage (héματο)                       | Dr CAILLOT    | Service d'Hématologie clinique<br>CHU Dijon - Hôpital d'enfants<br>10 Bd Mal de Lattre de Tassigny<br>21000 <b>DIJON</b> Cedex |
| 22 | DJN | CHU Dijon Hôpital du<br>Bocage (néphro)                       | Pr MOUSSON    | Service de Néphrologie<br>CHU Dijon<br>2 Bd Maréchal de Lattre de Tassigny<br>BP 77908<br>21079 <b>DIJON</b> Cedex             |

|    |     |                                                            |             |                                                                                                                                                                 |
|----|-----|------------------------------------------------------------|-------------|-----------------------------------------------------------------------------------------------------------------------------------------------------------------|
| 23 | EGP | CHU Georges Pompidou Hôpital Européen (néphro)             | Dr KARRAS   | Service de Néphrologie<br>Hôpital Européen G. Pompidou<br>20 rue Leblanc 75015 <b>PARIS</b>                                                                     |
| 16 | CCH | CH Hôtel-Dieu référent hémato pour le CHU Georges Pompidou | Pr BOUSCARY | Service d'Hématologie<br>Hôpital Cochin<br>27 rue du Faubourg St Jacques<br>75679 <b>PARIS</b> Cedex 14                                                         |
| 24 | GRN | CHU Grenoble Hôpital Albert Michallon (hémato)             | Dr PEGOURIE | Service d'Hématologie<br>Hôpital Albert Michallon<br>boulevard de la chantourne<br>BP 217<br>38043 <b>GRENOBLE</b> Cedex 9                                      |
| 25 | GRN | CHU Grenoble Hôpital Albert Michallon (nephro)             | Pr CARRON   | Service de Néphrologie<br>Hôpital Albert Michallon<br>boulevard de la chantourne<br>BP 217<br>38043 <b>GRENOBLE</b> Cedex 9                                     |
| 93 | HMN | CHU Henri Mondor (néphro)                                  | Dr BOUACHI  | Service de Néphrologie<br>Hôpital Henri Mondor<br>51 avenue du Mal de Lattre de Tassigny<br>94010 <b>CRETEIL</b> Cedex                                          |
| 26 | HMN | CHU Henri Mondor (hémato)                                  | Dr BELHADJ  | Unité Fonctionnelle : Hémopathie Lymphoïdes<br>Hématologie<br>Hôpital Henri Mondor<br>51 avenue du Maréchal de Lattre de Tassigny<br>94010 <b>CRETEIL</b> Cedex |
| 27 | JVR | CHU JEAN VERDIER (hémato)                                  | Pr FAIN     | Service d'Hématologie<br>Hôpital Jean Verdier<br>Avenue du 14 Juillet<br>93143 <b>BONDY</b> Cedex                                                               |

|    |     |                                                                         |                |                                                                                                                                            |
|----|-----|-------------------------------------------------------------------------|----------------|--------------------------------------------------------------------------------------------------------------------------------------------|
| 61 | SLS | Hôpital St Louis<br>référent néphrologie<br>pour le CHU JEAN<br>VERDIER | Pr PERALDI     | Service de Néphrologie<br>Hôpital Saint Louis<br>1 Av Claude Vellefaux<br>75010 <b>PARIS</b>                                               |
| 28 | KBC | CHU KREMLIN<br>BICETRE (néphro)                                         | Pr CHARPENTIER | Service de Néphrologie<br>CHU KREMLIN BICETRE<br>78 rue du Général Leclerc<br>94275 <b>LE KREMLIN BICETRE</b>                              |
| 29 | KBC | CHU KREMLIN<br>BICETRE (Rhumato)                                        | Dr MARIETTE    | Service de Rhumatologie<br>CHU KREMLIN BICETRE<br>78 rue du Général Leclerc<br>94275 <b>LE KREMLIN BICETRE</b>                             |
| 31 | LIL | CHU LILLE (héματο)                                                      | Pr FACON       | Service des maladies du sang<br>CHU de Lille<br>rue Michel Polonovski<br>59037 <b>LILLE</b> Cedex                                          |
| 30 | LIL | CHU LILLE (néphro)                                                      | Dr PROVOT      | Service de Néphrologie<br>Pôle de Néphrologie<br>Hôpital Calmette<br>CHRU de Lille<br>59000 <b>LILLE</b>                                   |
| 32 | LMG | CHU LIMOGES-<br>Hôpital Dupuytren<br>(néphro)                           | Pr ESSIG       | Service de Néphrologie,<br>Hémodialyse, Transplantation<br>CHU Limoges<br>2 Av Martin Luther King<br>87042 <b>LIMOGES</b> Cedex            |
| 33 | LMG | CHU LIMOGES-<br>Hôpital Dupuytren<br>(héματο)                           | Pr JACCARD     | Service d' Hématologie Clinique et de<br>Thérapie cellulaire<br>CHU Dupuytren<br>2 avenue Martin-Luther-King<br>87042 <b>LIMOGES</b> Cedex |
| 34 | HEH | CHU LYON- Hôpital<br>Edouard Herriot (HCL)<br>(néphro)                  | Dr JUILLARD    | Service de Néphrologie<br>Hôpital Edouard Herriot<br>Place d'Arsonval<br>69437 <b>LYON</b> Cedex 03                                        |

|    |     |                                                                                                   |              |                                                                                                                                                      |
|----|-----|---------------------------------------------------------------------------------------------------|--------------|------------------------------------------------------------------------------------------------------------------------------------------------------|
| 35 | HEH | CHU LYON- Hôpital Edouard Herriot (HCL) (héματο)                                                  | Pr MICHALLET | Service Hématologie Marcel Bérard<br>Centre Hospitalier Lyon Sud<br>Secteur 1G<br>694395 <b>PIERRE BENITE</b>                                        |
| 36 | LYS | CHU LYON Sud (héματο)                                                                             | Dr TRAULLE   | Service d'Hématologie<br>Centre Hospitalier Lyon Sud<br>165, chemin du grand revoyet<br>69495 <b>PIERRE BENITE</b> Cedex                             |
| 37 | LYS | CHU LYON Sud (néphro)                                                                             | Dr VILLAR    | Service de Néphrologie<br>Centre Hospitalier Lyon - Sud<br>165, chemin du grand Revoyet<br>69495 <b>PIERRE-BENITE</b> Cedex                          |
| 38 | MRS | CHU MARSEILLE- Hôpital de la Conception (APHM) (néphro)                                           | Dr BURTEY    | Service de Néphrologie<br>Hôpital de la Conception<br>147, boulevard Baille<br>13385 <b>MARSEILLE</b> cedex 5                                        |
| 39 | MRS | Institut Paoli Calmette référent héματο pour le CHU de MARSEILLE- Hôpital de la Conception (APHM) | Dr STOPPA    | Service d'hématologie<br>Institut Paoli-calmette 232,<br>bl de sainte marguerite<br>13273 <b>MARSEILLE</b> cedex 5                                   |
| 41 | NCY | CHU NANCY (néphro)                                                                                | Pr FRIMAT    | Service de Néphrologie<br>CHU De Nancy<br>Hôpital de Brabois<br>rue de Morvan<br>54511 <b>VANDOEUVRE LES NANCY</b><br><b>Cedex</b>                   |
| 40 | NCY | CHU NANCY (héματο)                                                                                | Dr HULIN     | Service d'Hématologie et de<br>Médecine Interne<br>CHU de Nancy<br>Hôpital de Brabois<br>Rue de Morvan<br>54511 <b>VANDOEUVRE LES NANCY</b><br>Cedex |

|    |     |                                              |                  |                                                                                                                                               |
|----|-----|----------------------------------------------|------------------|-----------------------------------------------------------------------------------------------------------------------------------------------|
| 43 | NTE | CHU NANTES<br>HOPITAL HOTEL DIEU<br>(héματο) | Pr MOREAU        | Service d'Hématologie<br>CHU Hôtel Dieu<br>Place Alexis Ricordeau<br>30 Bd Jean Monnet<br>44093 <b>NANTES</b> Cedex 01                        |
| 42 | NTE | CHU NANTES<br>HOPITAL HOTEL DIEU<br>(néphro) | Dr LAVAINNE      | Service de Néphrologie<br>CHU Hôtel Dieu Immeuble Jean<br>Monnet<br>30 Bd Jean Monnet<br>44093 <b>NANTES</b> Cedex                            |
| 17 | NCK | CHU NECKER<br>(néphro)                       | Pr KNEBELMANN    | Service de Néphrologie<br>Hôpital Necker<br>149 rue de Sèvres<br>75015 <b>PARIS</b>                                                           |
| 44 | NCK | CHU NECKER<br>(héματο)                       | Dr DELARUE       | Service d'Hématologie<br>Hôpital de Necker<br>149 rue de Sèvres<br>75015 <b>PARIS</b>                                                         |
| 46 | NIC | CHU NICE (héματο)                            | Pr FUZIBET       | Médecine Interne - Cancerologie<br>Hôpital de L'Archet<br>151 route de Saint antoine de<br>Ginestière<br>BP 3079<br>06202 <b>NICE</b> Cedex 3 |
| 45 | NIC | CHU NICE (néphro)                            | Pr ESNALUT       | Service de Néphrologie<br>Hôpital Pasteur<br>30 avenue de la voie Romaine<br>06002 <b>NICE</b>                                                |
| 48 | PSL | CHU PITIE<br>SALPETRIERE<br>(néphro)         | Pr ISNARD BAGNIS | Service de Néphrologie<br>Hôpital Pitié Salpétrière<br>47-83 Bd de l'Hôpital<br>75013 <b>PARIS</b>                                            |
| 47 | PSL | CHU PITIE<br>SALPETRIERE<br>(héματο)         | Dr ROOS-WEIL     | Service d'Hématologie<br>Hôpital Pitié Salpétrière<br>47-83 Bd de l'Hôpital<br>75013 <b>PARIS</b>                                             |



|    |     |                                                    |                   |                                                                                                                                              |
|----|-----|----------------------------------------------------|-------------------|----------------------------------------------------------------------------------------------------------------------------------------------|
| 49 | PTS | CHU POITIERS<br>(néphro)                           | Pr BRIDOUX        | Service de Néphrologie<br>CHU Poitiers<br>Hôpital Jean Bernard<br>2 rue de la Milettrie<br>86021 <b>POITIERS</b>                             |
| 50 | PTS | CHU POITIERS<br>(héματο)                           | Dr LACOTTE        | Département d'oncologie<br>Hématologique et Thérapie Cellulaire<br>CHRU de Poitiers<br>2rue de la Milettrie<br>86021 <b>POITIERS</b>         |
| 51 | RMS | CHU REIMS (néphro)                                 | Pr RIEU           | Service de Néphrologie<br>Centre Hospitalier Universitaire<br>Hôpital de la Maison Blanche<br>45 rue Cognacq Jay<br>51092 <b>REIMS</b> Cedex |
| 52 | RMS | CHU REIMS (héματο)                                 | Dr KOLB           | Hôpital Robert Debré - CHU de<br>Reims<br>avenue du Général Koenig<br>51092 Reims cedex                                                      |
| 54 | RNS | CHU RENNES<br>(médecine interne)                   | Dr DECAUX         | Service de Médecine interne<br>Hôpital Sud<br>16 Bd de Bulgarie<br>35203 <b>RENNES</b> Cedex                                                 |
| 55 | RNS | CHU RENNES<br>(héματο)                             | Dr ESCOFFRE-BARBE | Service d'Hématologie<br>Hôpital Pontchaillou<br>rue Henri le Guilloux<br>35033 <b>RENNES</b> Cedex 09                                       |
| 53 | RNS | CHU RENNES<br>(néphro)                             | Dr VIGNEAU        | Service de Néphrologie<br>CHU Pontchaillou<br>2 rue Henri Le Guilloux<br>35000 <b>RENNES</b>                                                 |
| 57 | ROU | CHU ROUEN Hopital<br>De Bois Guillaume<br>(néphro) | Dr LE ROY         | Service de Néphrologie<br>Hôpital du Bois Guillaume<br>Centre Hospitalier Universitaire<br>76031 <b>ROUEN</b> Cedex                          |

|    |     |                                                                  |               |                                                                                                                                                 |
|----|-----|------------------------------------------------------------------|---------------|-------------------------------------------------------------------------------------------------------------------------------------------------|
| 56 | ROU | Centre Becquerel<br>référent Hématologie<br>pour le CHU de ROUEN | DR LENAIN     | Service d'Hématologie<br>Centre Henri Becquerel<br>rue d'Amiens<br>76038 <b>ROUEN</b> Cedex                                                     |
| 58 | SAT | CHU St ANTOINE<br>(hémato)                                       | Dr GARDERET   | Service des maladies du sang et de<br>thérapie cellulaire<br>Hôpital Saint Antoine<br>184 rue du Fg Saint Antoine<br>75012 <b>PARIS</b>         |
| 95 | TNN | Hopital Tenon référent<br>Néphro pour le CHU de<br>St ANTOINE    | Pr RONCO      | Service de Néphrologie<br>Hôpital Tenon<br>4 rue de la Chine<br>75970 <b>PARIS</b> Cedex 20                                                     |
| 60 | ENN | CHU St ETIENNE<br>(hémato)                                       | Dr JAUBERT    | Service d'Hématologie<br>Institut de Cancérologie de la Loire<br>108 Bis Av albert Raymond<br>BP 60008<br>42271 <b>ST PRIEST EN JAREZ</b> Cedex |
| 59 | ENN | CHU St ETIENNE<br>(néphro)                                       | PR ALAMARTINE | Service de Néphrologie, Dialyse,<br>Transplantation Rénale<br>Hôpital Nord<br>CHRU de Saint Etienne<br>42055 <b>SAINT ETIENNE</b> Cedex 2       |
| 61 | SLS | CHU St LOUIS<br>(néphro)                                         | Pr PERALDI    | Service de Néphrologie<br>Hôpital St Louis<br>1 Av Claude Vellefaux<br>75010 <b>PARIS</b>                                                       |
| 1  | SLS | CHU St LOUIS<br>(hémato)                                         | Pr FERMAND    | Service d'Hématologie<br>Hôpital St Louis<br>1 Avenue Claude Vellefaux<br>75010 <b>PARIS</b>                                                    |

|    |     |                                                                 |             |                                                                                                                                          |
|----|-----|-----------------------------------------------------------------|-------------|------------------------------------------------------------------------------------------------------------------------------------------|
| 63 | SBG | CHU STRASBOURG<br>(néphro)                                      | Pr MOULIN   | Service de Néphrologie<br>Nouvel Hôpital Civil<br>1 Place de l'Hôpital<br>BP 426<br>67091 <b>STRASBOURG</b>                              |
| 62 | SBG | CHU STRASBOURG<br>(hémato)                                      | Pr LIOURE   | Département d'Hématologie et<br>Oncologie<br>CHRU HautePierre<br>67098 <b>STRASBOURG</b> Cedex                                           |
| 64 | TNN | CHU TENON (Néphro<br>A)                                         | Pr RONDEAU  | Service des Urgences<br>Néphrologiques et transplantation<br>Rénale<br>Hôpital Tenon<br>4 rue de la Chine<br>75970 <b>PARIS</b> Cedex 20 |
| 95 | TNN | CHU TENON (Néphro<br>B)                                         | Pr RONCO    | Service de Néphrologie<br>Hôpital Tenon<br>4 rue de la Chine<br>75970 <b>PARIS</b> Cedex 20                                              |
| 1  | SLS | Hôpital Saint Louis,<br>référent hémato pour le<br>CHU de TENON | Pr FERMAND  | Service d'Hématologie<br>Hôpital St Louis<br>1 Avenue Claude Vellefaux<br>75010 <b>PARIS</b>                                             |
| 58 | SAT | CHU Saint Antoine,<br>référent hémato pour le<br>CHU de TENON   | Dr GARDERET | Service des maladies du sang et<br>thérapie cellulaire<br>Hôpital Saint Antoine<br>184 rue du Fg Saint Antoine<br>75012 <b>PARIS</b>     |
| 65 | TSE | CHU TOULOUSE<br>(néphro)                                        | Pr CHAUVEAU | Service de Néphrologie<br>CHU de Rangueil,<br>1 avenue Jean Poulhès,<br>31059 <b>TOULOUSE</b> Cedex 9                                    |

|    |     |                                                                         |              |                                                                                                                                         |
|----|-----|-------------------------------------------------------------------------|--------------|-----------------------------------------------------------------------------------------------------------------------------------------|
| 66 | TSE | CHU TOULOUSE<br>(héματο)                                                | Dr ROUSSEL   | Service d'Hématologie<br>CHU Purpan<br>Place du Dr Baylac<br>TSA 40031<br>31059 <b>TOULOUSE</b> Cedex 9                                 |
| 68 | TRS | CHU TOURS-Hôpital<br>de Bretonneau<br>(héματο)                          | Dr BENBOUKER | Service d'Hématologie<br>Hôpital de Bretonneau<br>2, boulevard tonnellé<br>37000 <b>TOURS</b>                                           |
| 67 | TRS | CHU TOURS-Hôpital<br>de Bretonneau<br>(néphro)                          | Dr RABOT     | Service de Néphrologie<br>Hôpital de Bretonneau<br>2, boulevard tonnellé<br>37000 <b>TOURS</b>                                          |
| 90 | MFL | Hôpital de Montfermeil,<br>réfèrent héματο pour le<br>CH André Grégoire | Dr LENOBLE   | Service d'Hématologie<br>Centre Hospitalier Intercommunal<br>10 rue du Général Leclerc<br>93370 <b>MONTFERMEUIL</b>                     |
| 69 | MFL | CH André Grégoire<br>(néphro)                                           | Dr BELENFANT | Service de Néphrologie<br>Centre Hospitalier André Grégoire<br>56, bd de la Boissiere<br>93100 <b>MONTREUIL</b>                         |
| 70 | AGM | CH ANGOULEME<br>(néphro)                                                | Dr YVER      | Service de Néphrologie-hémodialyse<br>Centre Hospitalier D'Angoulême<br>Rond Point GIRAC<br>16470 <b>SAINT MICHEL</b>                   |
| 50 | PTS | CHU Poitiers réfèrent<br>héματο pour le CH<br>d'ANGOULEME               | Dr LACOTTE   | Département d'oncologie<br>Hématologique et Thérapie<br>Cellulaire<br>CHRU de Poitiers<br>2rue de la Miletirie<br>86021 <b>POITIERS</b> |

|    |     |                                              |                     |                                                                                                                             |
|----|-----|----------------------------------------------|---------------------|-----------------------------------------------------------------------------------------------------------------------------|
| 72 | AVG | CH Avignon Hôpital<br>Henri Duffaut (héματο) | Dr SLAMA            | Service d'Hématologie<br>Hôpital Henri Duffaut<br>305 rue Raoul Follereau<br>84902 <b>AVIGNON</b> Cedex 8                   |
| 71 | AVG | CH Avignon Hôpital<br>Henri Duffaut (néphro) | Dr GOBERT           | Service de Néphrologie<br>Hôpital Henri Duffaut<br>305 rue Raoul Follereau<br>84902 <b>AVIGNON</b> Cedex 8                  |
| 73 | TRB | CH de BIGORRE<br>(néphro)                    | Dr HEMERY           | Service de Néphrologie<br>Hôpital de Tarbes<br>Bd de l'attre de Tassigny<br>65000 <b>TARBES</b>                             |
| 91 | TRB | CH de BIGORRE<br>(héματο)                    | Dr DINGREMONT       | Service de Médecine Interne<br>CH Tarbes Vic-Bigorre<br>Bd de Lattre de Tassigny<br>BP 1330<br>65013 <b>TARBES</b> Cedex 09 |
| 74 | BLG | CH Boulogne sur Mer<br>(néphro)              | Dr BATAILLE         | Service de Néphrologie<br>Centre Hospitalier de Boulogne sur<br>mer<br>BP 609<br>62321 <b>BOULOGNE SUR MER</b> cedex        |
| 75 | BLG | CH Boulogne sur Mer<br>(héματο)              | Dr CHOUFFI-BELGHOUL | Service d'Hématologie<br>Centre Hospitalier de Boulogne sur<br>mer<br>BP 609<br>62321 <b>BOULOGNE SUR MER</b> cedex         |
| 76 | CHR | CH CHARTRES<br>(néphro)                      | Dr GODART           | Service de Néphrologie<br>Hôtel Dieu<br>34 rue du docteur Maunoury<br>28018 <b>CHARTRES</b>                                 |

|    |     |                             |                     |                                                                                                                            |
|----|-----|-----------------------------|---------------------|----------------------------------------------------------------------------------------------------------------------------|
| 77 | CHR | CH CHARTRES<br>(héματο)     | Dr MAIGRE           | Service d'Hématologie- Oncologie<br>médicale<br>CH de Chartres<br>BP 407<br>28018 <b>CHARTRES</b> Cedex                    |
| 79 | DNK | CH de Dunkerque<br>(héματο) | Dr VETTERWALD       | Service d'Hématologie<br>Hôpital de Dunkerque<br>130, avenue Louis Herbeaux<br>BP 6 367<br>59385 <b>DUNKERQUE</b> cedex 1  |
| 78 | DNK | CH de Dunkerque<br>(néphro) | Dr AZAR             | Service de Néphrologie<br>Hôpital de Dunkerque<br>130, avenue Louis Herbeaux<br>BP 6 367<br>59385 <b>DUNKERQUE</b> cedex 1 |
| 81 | FCH | CH Foch (héματο)            | Dr GLAISNER         | Service d'Hématologie<br>Hôpital Foch<br>40, rue Worth<br>92151 <b>SURESNES</b>                                            |
| 80 | FCH | CH Foch (néphro)            | Dr DELAHOUSSE       | Service de Néphrologie<br>Hôpital Foch<br>40 rue Worth<br>92150 <b>SURESNES</b>                                            |
| 82 | HVR | CH le Havre (rhumato)       | Dr ZARNITSKY        | Service de Rhumatologie<br>CH le Havre<br>29, avenue Pierre Mendès France<br>Montivilliers<br>76290 <b>LE HAVRE</b>        |
| 92 | HVR | CH le Havre (néphro)        | Dr THUILLIER-LECOUF | Service de Néphrologie<br>CH le Havre<br>29, avenue Pierre Mendès France<br>Montivilliers<br>76290 <b>LE HAVRE</b>         |

|    |     |                                  |              |                                                                                                                                                                           |
|----|-----|----------------------------------|--------------|---------------------------------------------------------------------------------------------------------------------------------------------------------------------------|
| 84 | RSY | CHD La Roche sur Yon<br>(hémato) | Dr TIAB      | Service d'Hématologie<br>CHD Vendée<br>Bd Stephane Moreau<br>85925 <b>LA ROCHE SUR YON</b>                                                                                |
| 83 | RSY | CHD La Roche sur Yon<br>(néphro) | Dr OTTAVIOLI | Service de Néphrologie-Dialyse<br>CHD des Oudairies<br>Bd Stephane Moreau<br>85925 <b>LA ROCHE SUR YON</b> Cedex<br>9                                                     |
| 85 | CRB | CH Sud Francilien<br>(hémato)    | Dr JOLY      | Service d'Hématologie<br>Centre Hospitalier Sud Francilien<br>Service Hématologie Clinique, Pôle<br>D, 3ème étage<br>116 bd Jean Jaurès<br>91100 <b>Corbeil-Essonnes</b>  |
| 86 | CRB | CH Sud Francilien<br>(néphro)    | Dr CAUDWEL   | Service de Néphrologie<br>Centre Hospitalier Sud Francilien<br>Service Hématologie Clinique, Pôle<br>D, 3ème étage<br>116 bd Jean Jaurès<br>91100 <b>Corbeil-Essonnes</b> |
| 87 | VLC | CH Valenciennes<br>(néphro)      | Dr Vrigneaud | Service de Néphrologie<br>CH Valenciennes<br>Avenue Desandrouin<br>BP 479<br>59322 <b>VALENCIENNES</b> Cedex                                                              |
| 88 | VLC | CH Valenciennes<br>(hémato)      | Dr POLLET    | Service d'Hématologie<br>CH Valenciennes<br>Avenue Desandrouin<br>BP 479<br>59322 <b>VALENCIENNES</b> Cedex                                                               |

|     |     |                                                       |               |                                                                                                                    |
|-----|-----|-------------------------------------------------------|---------------|--------------------------------------------------------------------------------------------------------------------|
| 96  | KBC | CHU Kremlin Bicêtre,<br>référent néphro pour<br>l'IGR | DURRBACH      | Service de Néphrologie<br>CHU Kremlin Bicetre<br>78 rue du Général Leclerc<br>94275 <b>LE KREMLIN BICETRE</b>      |
| 89  | IGR | IGR (héματο)                                          | Dr RIBRAG     | Service d'Hématologie<br>Institut Gustave Roussy<br>39 rue C desmoulin<br>94805 <b>VILLEJUIF</b>                   |
| 97  | RCH | CH La Rochelle                                        | Dr LEROY      | Service de Néphrologie et médecine<br>interne<br>1 rue du Dr Schweitzer<br>CH St Louis<br>17000 <b>LA ROCHELLE</b> |
| 98  | RCH | CH La Rochelle                                        | Dr FLECK      | Service d'oncologie<br>1 rue du Dr Schweitzer<br>CH St Louis<br>17000 <b>LA ROCHELLE</b>                           |
| 99  | NRT | CH Niort                                              | Dr MOTARD     | Service de médecine interne<br>hématologie<br>CH Niort<br>40 avenue Charles De Gaulle<br>97021 <b>NIORT</b>        |
| 100 | NRT | CH Niort                                              | Dr MOUMAS     | Service de néphrologie<br>CH Niort<br>40 avenue Charles De Gaulle<br>97021 <b>NIORT</b>                            |
| 101 | PON | CH Pontoise                                           | Dr BENRAMDANE | Service d'oncohématologie<br>CH René Dubos<br>6 Av de l'IE de France<br>95000 <b>PONTOISE</b>                      |
| 102 | PON | CH Pontoise                                           | Dr MONTSENY   | Service de néphrologie<br>CH René Dubos<br>6 Av de l'IE de France<br>95000 <b>PONTOISE</b>                         |



|     |     |                                                                  |               |                                                                                                               |
|-----|-----|------------------------------------------------------------------|---------------|---------------------------------------------------------------------------------------------------------------|
| 103 | HAG | CH HAGUENAU                                                      | Pr DIMITROV   | Service de néphrologie<br>64 Avenue Prof Leriche,<br>67504- <b>Haguenau</b>                                   |
| 62  | SBG | CHU STRASBOURG<br>Réfèrent hémato pour<br>le CH HAGUENAU         | Pr LIOURE     | Département d'Hématologie et<br>Oncologie<br>CHRU Hautepierre<br>67098 <b>STRASBOURG</b> Cedex                |
| 38  | MRS | CHU MARSEILLE-<br>Hôpital de la<br>Conception (APHM)<br>(néphro) | Dr BURTEY     | Service de Néphrologie<br>Hôpital de la Conception<br>147, boulevard Baille<br>13385 <b>MARSEILLE</b> cedex 5 |
| 104 | MRS | CHU MARSEILLE-<br>Hôpital de la<br>Conception (APHM)<br>(hémato) | Dr COSTELLO   | Service d'hématologie<br>Hôpital de la Conception<br>147, boulevard Baille<br>13385 <b>MARSEILLE</b> cedex 5  |
| 105 | LNS | Centre Hospitalier de<br>Lens (hémato)                           | Dr MOREL      | Service d'hématologie<br>Centre Hospitalier de Lens<br>99, Route de la Bassée<br>62300 <b>LENS</b>            |
| 106 | LNS | Centre Hospitalier de<br>Lens (néphro)                           | Dr MAC NAMARA | Service d'hémodialyse<br>Centre Hospitalier de Lens<br>99, Route de la Bassée<br>62300 <b>LENS</b>            |
| 107 | LNS | Centre Hospitalier de<br>Béthune (néphro)                        | Dr MAC NAMARA | Service d'hémodialyse<br>Centre hospitalier de <b>Béthune</b><br>rue Delbecque<br>62660 BEUVRY                |
| 108 | LMN | CH LE MANS (hémato)                                              | Dr LARIBI     | CH LE MANS<br>Service d'oncologie-hématologie<br>194 avenue Rubillard<br>72000 LE MANS                        |
| 109 | LMN | CH LE MANS (néphro)                                              | Dr COINDRE    | CH LE MANS<br>Service de néphrologie<br>194 avenue Rubillard<br>72000 LE MANS                                 |
| 110 | ORL | CHR Orléans                                                      | Dr BENBRAHIM  | CHR Orléans                                                                                                   |

|     |     |                                            |                    |                                                                                                                                     |
|-----|-----|--------------------------------------------|--------------------|-------------------------------------------------------------------------------------------------------------------------------------|
|     |     | (héματο)                                   |                    | Service d'onco-hématologie<br>14 avenue de l'Hôpital<br>45100 ORLEANS                                                               |
| 111 | ORL | CHR Orléans<br>(néphro)                    | Dr EL KHOURU-HANNA | CHR Orléans<br>Service de néphrologie<br>14 avenue de l'Hôpital<br>45100 ORLEANS                                                    |
| 112 | PPG | CH de Perpignan<br>(héματο)                | Dr SANHES          | CH St Jean<br>Service d'Hématologie Clinique<br>Avenue du Languedoc<br>66 000 Perpignan                                             |
| 113 | PPG | CH de Perpignan                            | Dr VELA            | CH St Jean<br>Service de néphrologie<br>Avenue du Languedoc<br>66 000 Perpignan                                                     |
| 114 | QPR | CH de Cornouaille<br>(Médecine interne)    | Dr HUTIN           | CH de Cornouaille<br>Service de médecine interne<br>Maladies infectieuses-Maladies du<br>sang<br>14 av Yves Thépot<br>29107 QUIMPER |
| 115 | QPR | CH de Cornouaille<br>(néphro)              | Dr SIOHAN          | CHG Laennec<br>Service de néphrologie<br>14 av Yves Thépot<br>29107 QUIMPER                                                         |
| 116 | MEX | Centre hospitalier de<br>Meaux<br>(héματο) | Dr FOUILLARD       | Service d'hématologie et de thérapie<br>cellulaire<br>Centre hospitalier de Meaux<br>6-8 rue Saint Fiacre<br>77100 Meaux            |
| 117 | MEX | Centre hospitalier de<br>Meaux<br>(néphro) | Dr FARAH           | Service de néphrologie<br>Centre hospitalier de Meaux<br>6-8 rue Saint Fiacre<br>77100 Meaux                                        |
| 118 | STB | Centre Hospitalier de<br>St Brieuc         | Dr BOULAHROUZ      | Hopital Yves le Foll<br>Service de néphrologie<br>10 r Marcel Proust<br>22027 ST BRIEUC CEDEX 1                                     |
| 119 | STB | Centre Hospitalier de<br>St Brieuc         | Dr ALLANGBA        | Hopital Yves le Foll<br>Service d'hématologie<br>10 r Marcel Proust<br>22027 ST BRIEUC CEDEX 1                                      |

|     |     |                           |                    |                                                                                                                                       |
|-----|-----|---------------------------|--------------------|---------------------------------------------------------------------------------------------------------------------------------------|
| 120 | LIC | Hôpital St Vincent GH-ICL | Dr CLIQUENNOIS     | Hôpital St Vincent GH-ICL<br>Service d'onco-hématologique<br>Boulevard de Belfort<br>59020 LILLE                                      |
| 121 | LIC | Hôpital St Vincent GH-ICL | Dr HOFFMANN        | Hôpital privé La louvière<br>Service de néphrologie<br>69 rue de la Louvière<br>59000 LILLE                                           |
| 122 | BRG | CH de BOURGES             | Dr MAAKAROUN       | CH de BOURGES<br>Hôpital Jacques-Cœur<br>Unité d'hématologie Clinique<br>145, avenue François Mitterrand<br>18020 BOURGES Cedex       |
| 123 | BRG | CH de BOURGES             | Dr RIFARD          | CH de BOURGES<br>Hôpital Jacques-Cœur<br>Service de néphrologie-Hémodialyse<br>145, avenue François Mitterrand<br>18020 BOURGES Cedex |
| 124 | ANC | CH de la région d'ANNECY  | Dr ORSINI-PIOCELLE | CHRA<br>Service d'hématologie<br>BP 90074<br>1 avenue de l'hôpital METZ-TESSY<br>74374- PRINGY Cedex                                  |
| 125 | ANC | CH de la région d'ANNECY  | Dr TURC-BARON      | CHRA<br>Service de néphrologie<br>BP 90074<br>1 avenue de l'hôpital METZ-TESSY<br>74374- PRINGY Cedex                                 |

**APPENDIX 10. Study synopsis: inclusion/screening period prior to randomization**

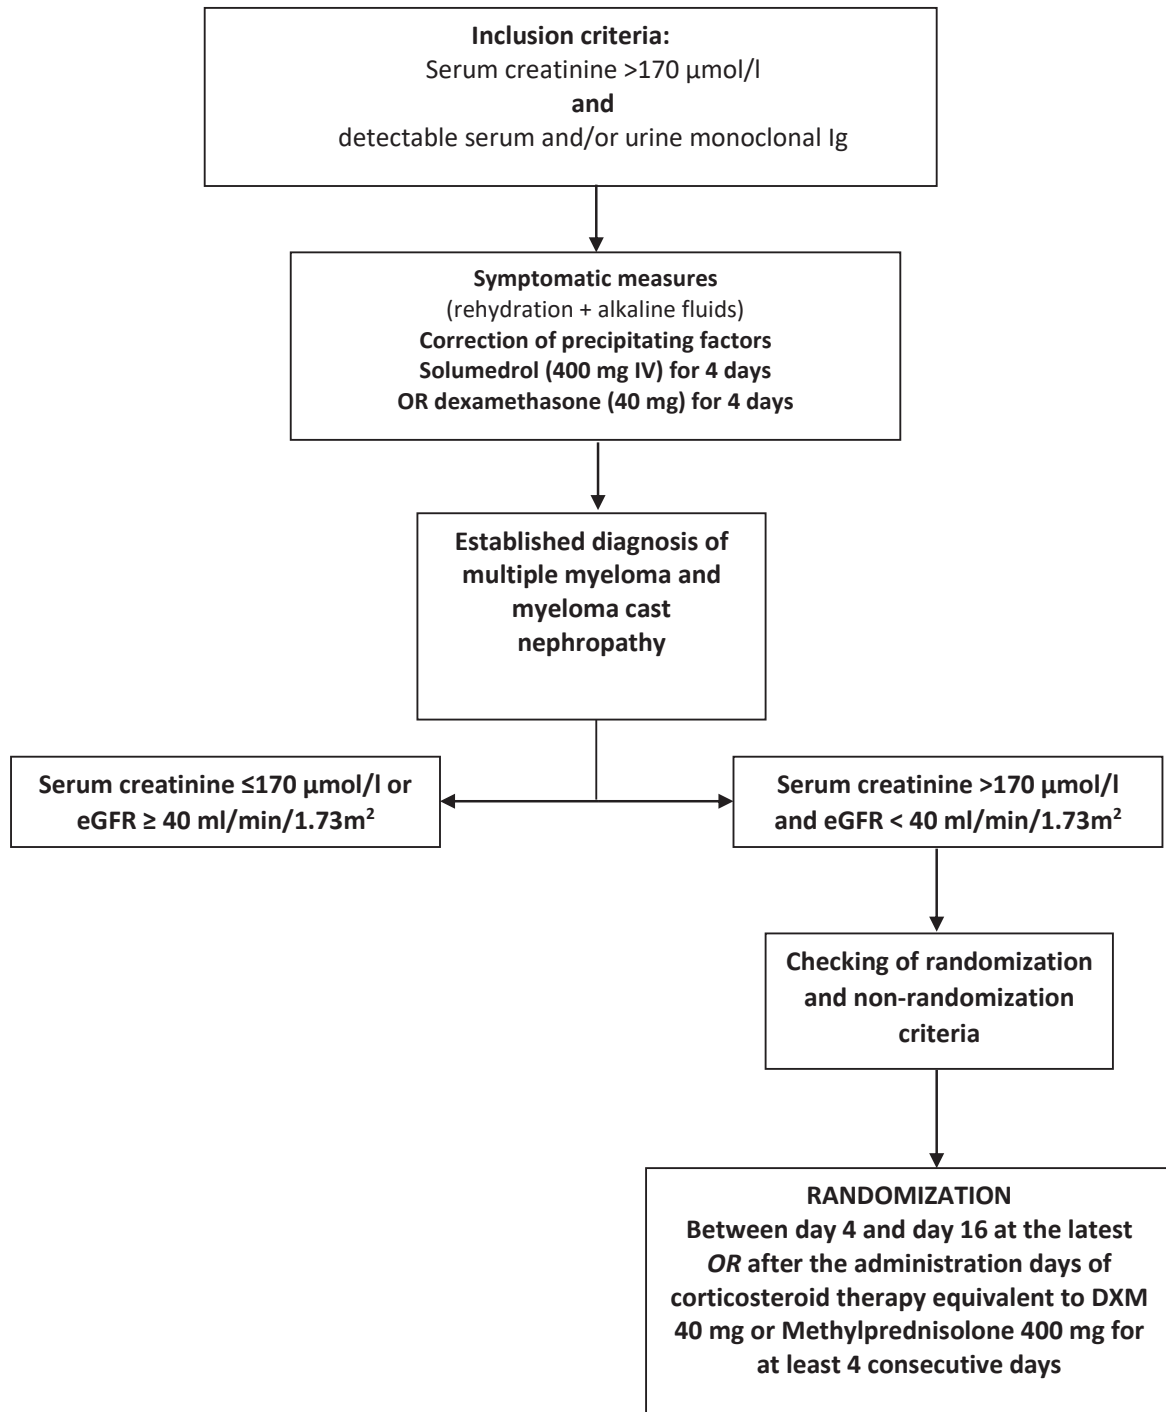

**Appendix 11. Study synopsis - Patients not requiring dialysis: randomization for chemotherapy**

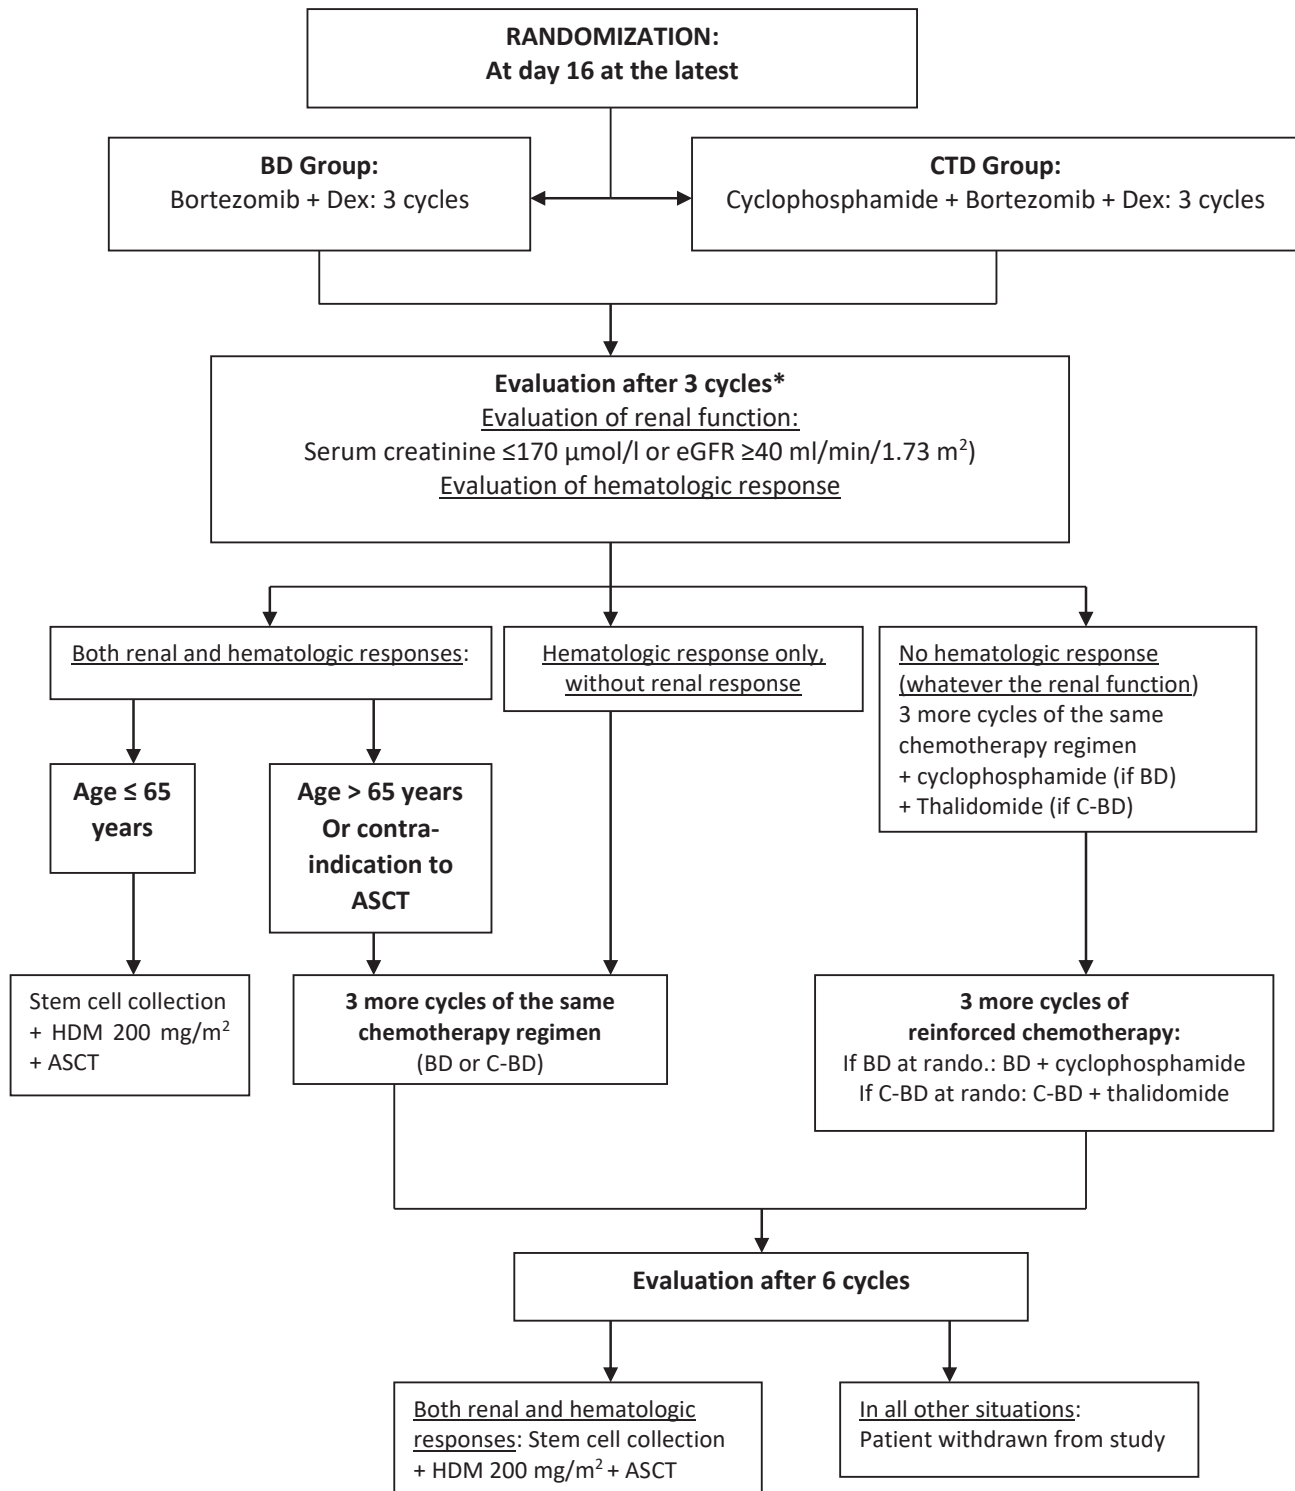

\* For patients requiring hemodialysis before the second course of chemotherapy, and who are randomized for the dialysis membrane, B-CD is stopped and replaced by BD.

**APPENDIX 12. Study synopsis - Patients requiring hemodialysis: randomization for the hemodialysis membrane**

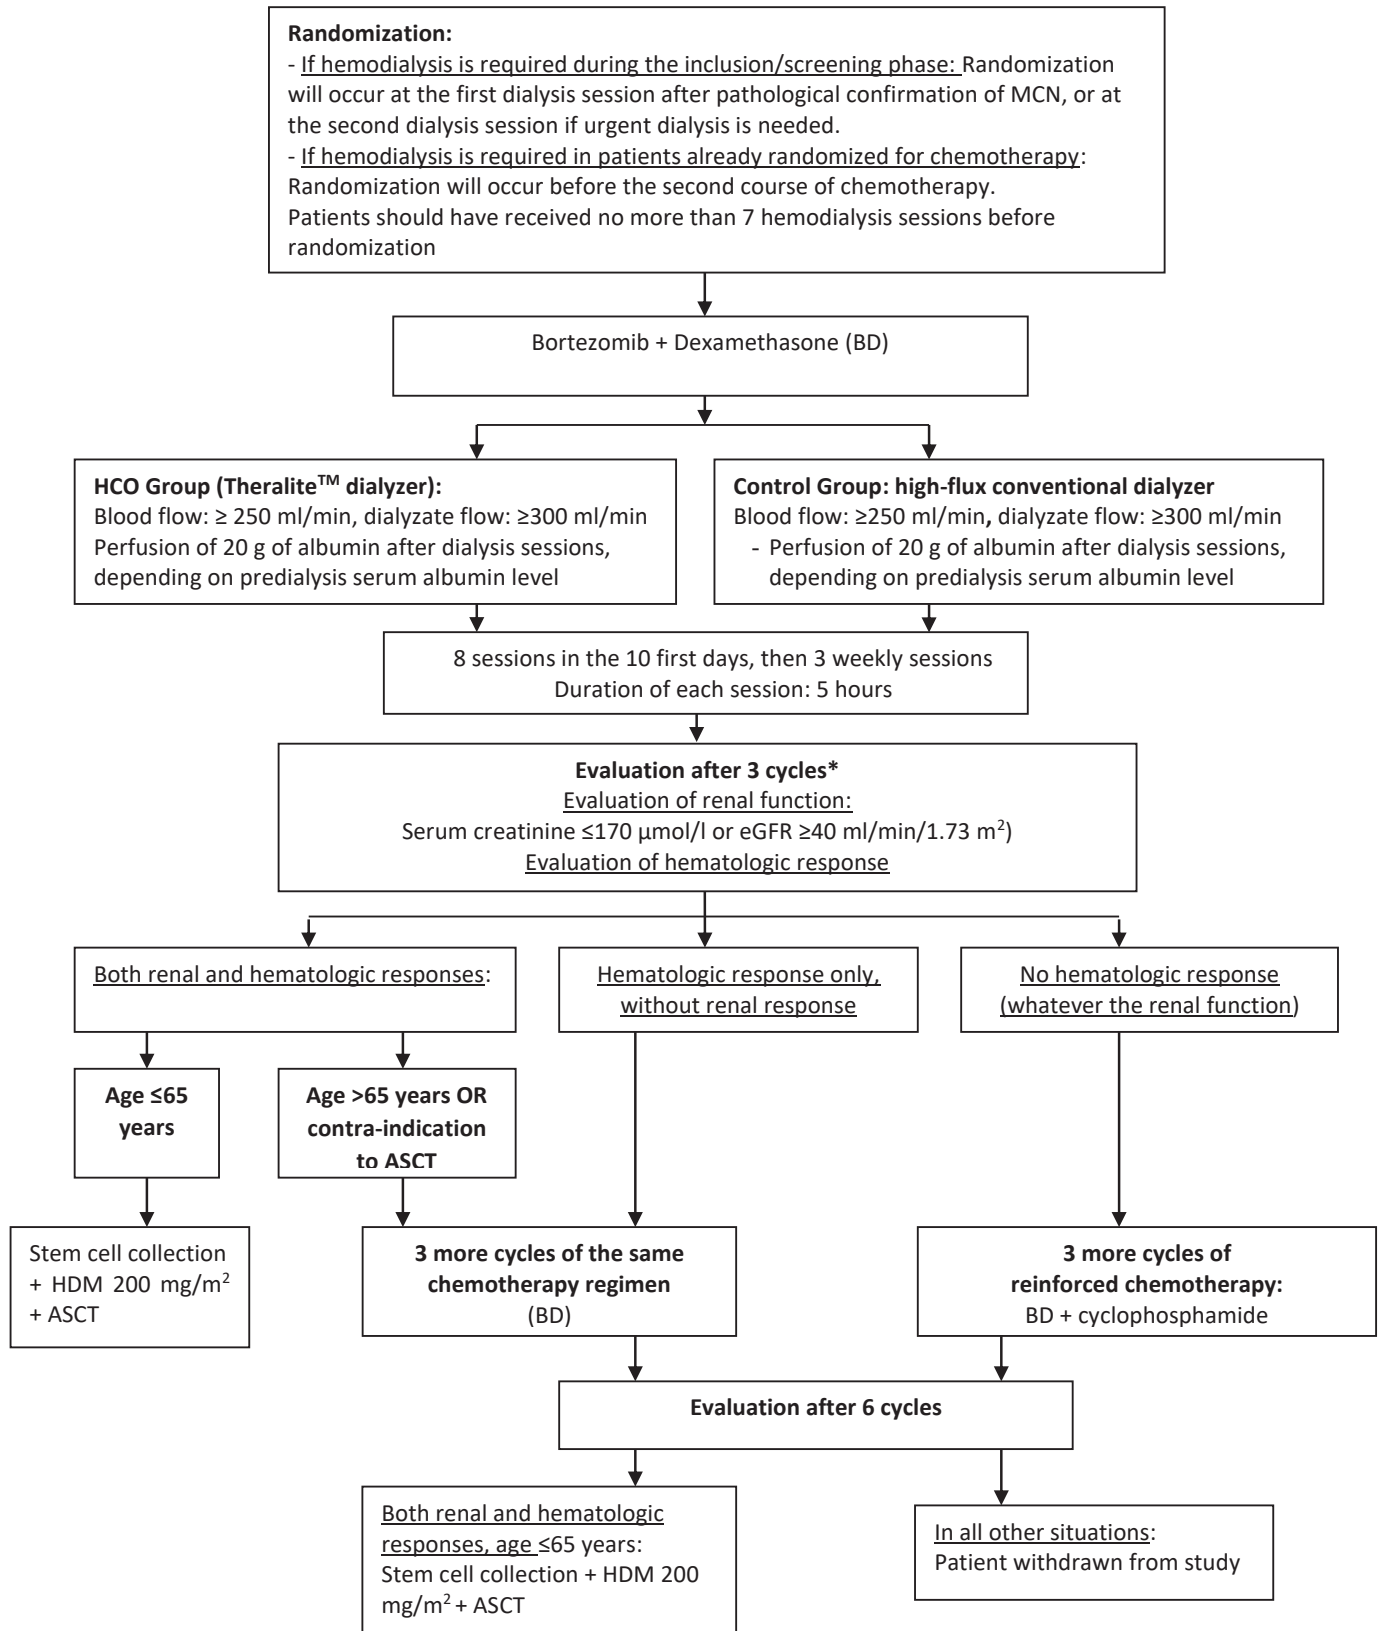

### **APPENDIX 13. Summary of Product Characteristics (SmPC)**

Bortezomib (Velcade®) ([http://www.ema.europa.eu/docs/fr\\_FR/document\\_library/EPAR\\_-\\_Product\\_Information/human/000539/WC500048471.pdf](http://www.ema.europa.eu/docs/fr_FR/document_library/EPAR_-_Product_Information/human/000539/WC500048471.pdf))

Thalidomide ([http://www.ema.europa.eu/docs/fr\\_FR/document\\_library/EPAR\\_-\\_Product\\_Information/human/000823/WC500037050.pdf](http://www.ema.europa.eu/docs/fr_FR/document_library/EPAR_-_Product_Information/human/000823/WC500037050.pdf) )

Dexamethasone (Neodex®) ([https://ec.europa.eu/health/documents/community-register/2016/20160316134053/anx\\_134053\\_fr.pdf](https://ec.europa.eu/health/documents/community-register/2016/20160316134053/anx_134053_fr.pdf))

Methylprednisolone Hemisuccinate (Solumedrol®) (<http://agence-prd.ansm.sante.fr/php/ecodex/rcp/R0165262.htm>)

Cyclophosphamide (Endoxan ®) (<http://agence-prd.ansm.sante.fr/php/ecodex/rcp/R0139134.htm>)

Theralite™ operating instructions

APPENDIX 14: CLASSIFICATION OF ADVERSE EVENTS

|                                                                                                                                                                                                                                          |                                                                                                                                                                                                                                                                      |                                                                                                                                                                                                                                                                                                                                                                                                                                                                                                                                                                                                                                                                                                                                                                                                                                                                                                                                                                                                                                                                                                                                                                                                                                                                                                                                                                                                                                                                                                                                                                                                                                                                                                                                                                                                                                                                                                                                                                                                                                                                                                                                                                                                                                                                                                                                                                                                                                                                                                                                                                                                                                                                                                                                                                                                                                                                                                                                       |
|------------------------------------------------------------------------------------------------------------------------------------------------------------------------------------------------------------------------------------------|----------------------------------------------------------------------------------------------------------------------------------------------------------------------------------------------------------------------------------------------------------------------|---------------------------------------------------------------------------------------------------------------------------------------------------------------------------------------------------------------------------------------------------------------------------------------------------------------------------------------------------------------------------------------------------------------------------------------------------------------------------------------------------------------------------------------------------------------------------------------------------------------------------------------------------------------------------------------------------------------------------------------------------------------------------------------------------------------------------------------------------------------------------------------------------------------------------------------------------------------------------------------------------------------------------------------------------------------------------------------------------------------------------------------------------------------------------------------------------------------------------------------------------------------------------------------------------------------------------------------------------------------------------------------------------------------------------------------------------------------------------------------------------------------------------------------------------------------------------------------------------------------------------------------------------------------------------------------------------------------------------------------------------------------------------------------------------------------------------------------------------------------------------------------------------------------------------------------------------------------------------------------------------------------------------------------------------------------------------------------------------------------------------------------------------------------------------------------------------------------------------------------------------------------------------------------------------------------------------------------------------------------------------------------------------------------------------------------------------------------------------------------------------------------------------------------------------------------------------------------------------------------------------------------------------------------------------------------------------------------------------------------------------------------------------------------------------------------------------------------------------------------------------------------------------------------------------------------|
| <p>Grille de Notification des Evénements Indésirables pour une Recherche Biomédicale portant sur un médicament ou un produit assimilé (Art. R. 1123-54 du Code de la Santé publique)<br/>09JFD-MYRE_grille-vigilance_v2_20120218.doc</p> | <p>ASSISTANCE PUBLIQUE<br/>HÔPITAUX DE PARIS</p>                                                                                                                                    | <p>Risque de la Recherche : <b>D</b></p> <p>Codes projet :<br/>P081226 – EudraCT : 2009-017926-38</p> <p><b>MYRE</b></p>                                                                                                                                                                                                                                                                                                                                                                                                                                                                                                                                                                                                                                                                                                                                                                                                                                                                                                                                                                                                                                                                                                                                                                                                                                                                                                                                                                                                                                                                                                                                                                                                                                                                                                                                                                                                                                                                                                                                                                                                                                                                                                                                                                                                                                                                                                                                                                                                                                                                                                                                                                                                                                                                                                                                                                                                              |
| <p>Evénements recensés dans le protocole comme ne devant pas être notifiés mais qui pourront être recueillis dans le cahier d'observation (CRF)</p>                                                                                      | <p><b>A NE PAS NOTIFIER AU PROMOTEUR</b></p> <p><b>Effets Indésirables (EI) Non Graves ATTENDUS</b></p> <p>Connus pour être liés aux médicaments expérimentaux, au dispositif médical expérimental ou aux actes et procédures de la recherche (Réf : CTCAE v4.0)</p> | <p><b>Liés au bortezomib</b></p> <ul style="list-style-type: none"> <li>• Infections et infestations</li> <li>- Rhino-pharyngite.</li> <li>- Grade ≤ 2 : bronchite, sinusite, pneumonie infection en relation avec un cathéter, bactériémie, infections des voies respiratoires supérieures et inférieures, infection pleurale, infection fongique, infection urinaire.</li> <li>• Affections hématologiques et du système lymphatique</li> <li>- Grade ≤ 2 : anémie, thrombocytopénie, purpura thrombocytopénique, neutropénie, lymphopénie, leucopénie.</li> <li>• Affections du système nerveux</li> <li>- Grade ≤ 2 : neuropathie périphérique, paresthésies, encéphalopathie étourdissement (à l'exclusion des vertiges), troubles de l'attention, augmentation de l'activité somnolence, troubles cognitifs, vertiges orthostatiques, sciatique, mouvements saccadés, hémorragie intracranienne, syndrome de leuco encéphalopathie postérieure réversible, hypotension orthostatique.</li> <li>• Affections gastro-intestinales</li> <li>- Stomatite, selles trop liquides, flatulences, saignement gingival, douleur buccale, haut-le-cœur, pétéchies de la muqueuse buccale, langue décolorée, langue saburrale, colite liée aux antibiotiques, modification du transit, gêne abdominale, éructation, hypersalivité, émérite, douleur splénique.</li> <li>- Grade ≤ 2 : distension abdominale, douleur abdominale, diarrhées, vomissements, nausées, constipation, douleur de l'abdomen supérieur, sécheresse buccale, dyspepsie, ulcération buccale, douleur gingivale, douleur pharyngo-laryngée, colite ischémique, colite, hémorragie gastro-intestinale, hémorragie rectale, gastrite, reflux gastro-œsophagien, douleur gastro-intestinale, dysphagie, hoquet, trouble de la motilité gastro-intestinale.</li> <li>• Troubles généraux et anomalies au site d'administration</li> <li>- Syndrome pseudo-grippal, malaise, faiblesse, frissons, léthargie, chute sensation de froid, sensibilité au toucher, sensation d'oppression thoracique, gêne pectorale, oppression thoracique, inflammation des muqueuses</li> <li>- Grade ≤ 2 : fatigue, douleur, douleur de l'aine, douleur thoracique, pyrexie, asthénie, névralgie, phlébite au point d'injection, érythème au site d'injection.</li> </ul> <p>(Liste non exhaustive : se reporter au RCP de Velcade® en vigueur).</p>                                                                                                                                                                                                                                                                                                                                                                                                                                                                                                                                       |
| <p>Evénements recensés dans le protocole comme ne devant pas être notifiés mais qui pourront être recueillis dans le cahier d'observation (CRF)</p>                                                                                      | <p><b>A NOTIFIER SANS DELAI AU PROMOTEUR</b></p> <p><b>Evénements Indésirables Graves (EIG) ATTENDUS</b></p> <p>(Réf : CTCAE v4.0)</p>                                                                                                                               | <p><b>Liés au bortezomib</b></p> <ul style="list-style-type: none"> <li>• Infections et infestations</li> <li>- Zona, herpès, septicémie, méningo-encéphalite herpétique, pneumopathie à pneumocoques, névralgie post herpétique, candidose orale, blépharite, infection à <i>Haemophilus</i>, zona, infection à <i>Cytomegalovirus</i>, infection à <i>Candida</i>, mononucléose infectieuse, varicelle.</li> <li>- Grade ≥ 3 : choc septique, sepsis.</li> <li>• Affections hématologiques et du système lymphatique</li> <li>- Anémie hémolytique, pancytogénie, lymphadénopathie.</li> <li>- Grade ≥ 3 : thrombocytopénie, neutropénie fébrile, anémie, leucopénie, lymphopénie, purpura thrombocytopénique.</li> <li>• Affections du système nerveux</li> <li>- Syndrome des jambes sans repos, polyémylie, hypoesthésie, parapésie, hémorragie sous-arachnoïdienne, convulsions, neuropathie autonome, parésie, mono névrite, dysgueusie, agueusie, migraine, troubles cognitifs</li> <li>- Grade ≥ 3 : encéphalopathie, étourdissement, neuropathie sensitive périphérique, troubles de l'attention, augmentation de l'activité somnolence, dysesthésie, mouvements saccadés, neuropathie périphérique aggravée, encéphalopathie, hémorragie intracranienne, syndrome de leuco encéphalopathie postérieure réversible, neuropathie motrice périphérique, céphalées, paresthésies, syncope, tremblement, hypotension orthostatique.</li> <li>• Affections gastro-intestinales</li> <li>- Diarrhée hémorragique, œsophagie, hémie hatale, hématomèse, fécatoème, syndrome de l'intestin irritable.</li> <li>- Grade ≥ 3 : hoquet, douleur de l'abdomen supérieur, ulcération buccale, douleur pharyngo-laryngée, saignement gingival, diarrhées, vomissements, constipation, colite ischémique, pancréatite aiguë, iléus paralytique, colite, hémorragie gastro-intestinale, hémorragie rectale, gastrite, reflux gastro-œsophagien, douleur gastro-intestinale, dysphagie, distension abdominale, nausées, douleur abdominale, sécheresse buccale, dyspepsie, douleur gingivale, œsophagite, gastrite, trouble de la motilité gastro-intestinale.</li> <li>• Affections de la peau et du tissu sous-cutané</li> <li>- Nécrolyse épidermique toxique, syndrome de Stevens-Johnson</li> <li>- Troubles généraux et anomalies au site d'administration</li> <li>- Œdème, inflammation extravasée, œdème périphérique, hémorragie muqueuse.</li> <li>- Grade ≥ 3 : fatigue, douleur, douleur de l'aine, douleur thoracique, pyrexie, asthénie, névralgie.</li> <li>• Tumeurs bénignes et malignes (y compris kystes et polypes)</li> <li>- Grade 2-3 : syndrome de l'yeu tumoral.</li> <li>• Affections du système immunitaire</li> <li>- Réactions potentiellement méditées par les complexes immuns telles que des réactions à types malalaie sérique, polyarthrite avec éruption, et glomérulonéphrite proliférative.</li> </ul> |
| <p>Evénements recensés dans le protocole comme ne devant pas être notifiés mais qui pourront être recueillis dans le cahier d'observation (CRF)</p>                                                                                      | <p><b>Effets Indésirables Graves (EIG) INATTENDUS (SUSARS)</b></p>                                                                                                                                                                                                   | <p>Notifier tous les événements présentant l'un des critères de gravité noté ci-dessous, à l'exception de ceux recensés dans le protocole comme ne devant pas être notifiés :</p> <ol style="list-style-type: none"> <li>1- Décès</li> <li>2- Mise en jeu du pronostic vital</li> <li>3- Nécessité ou prolonge l'hospitalisation</li> <li>4- Séquelles durables</li> <li>5- Anomalie ou malformation congénitale</li> <li>6- Evénement jugé grave par l'investigateur (raison à préciser)</li> </ol> <p><b>ATTENTION : toute découverte d'une GROSSESE au décours d'une recherche biomédicale doit être immédiatement déclarée au promoteur et fera l'objet d'un suivi jusqu'à l'accouchement.</b></p>                                                                                                                                                                                                                                                                                                                                                                                                                                                                                                                                                                                                                                                                                                                                                                                                                                                                                                                                                                                                                                                                                                                                                                                                                                                                                                                                                                                                                                                                                                                                                                                                                                                                                                                                                                                                                                                                                                                                                                                                                                                                                                                                                                                                                                |



|                                                                                                                                                                                                                                            |                                                                                                                                |                                                                                                                                                                                                                                                     |                                                                                                                                                                                                                                                                                                                                                                                                                                                                                                                                                                                                                                                                                                                                                   |                                                                                                                                                                                                                                                                                                                                                                                                                                                                                                                                                                                                                                                                                                                                                                                                                                                                                                                                                                                                                                                                                                                                                                                                                                                                                                                                                                                                                                                                                                |                                                                                                                                                                                                                                                                                                                                                                                                                                                                                                                                                                                                                                                                                                                                                                                                                                                |
|--------------------------------------------------------------------------------------------------------------------------------------------------------------------------------------------------------------------------------------------|--------------------------------------------------------------------------------------------------------------------------------|-----------------------------------------------------------------------------------------------------------------------------------------------------------------------------------------------------------------------------------------------------|---------------------------------------------------------------------------------------------------------------------------------------------------------------------------------------------------------------------------------------------------------------------------------------------------------------------------------------------------------------------------------------------------------------------------------------------------------------------------------------------------------------------------------------------------------------------------------------------------------------------------------------------------------------------------------------------------------------------------------------------------|------------------------------------------------------------------------------------------------------------------------------------------------------------------------------------------------------------------------------------------------------------------------------------------------------------------------------------------------------------------------------------------------------------------------------------------------------------------------------------------------------------------------------------------------------------------------------------------------------------------------------------------------------------------------------------------------------------------------------------------------------------------------------------------------------------------------------------------------------------------------------------------------------------------------------------------------------------------------------------------------------------------------------------------------------------------------------------------------------------------------------------------------------------------------------------------------------------------------------------------------------------------------------------------------------------------------------------------------------------------------------------------------------------------------------------------------------------------------------------------------|------------------------------------------------------------------------------------------------------------------------------------------------------------------------------------------------------------------------------------------------------------------------------------------------------------------------------------------------------------------------------------------------------------------------------------------------------------------------------------------------------------------------------------------------------------------------------------------------------------------------------------------------------------------------------------------------------------------------------------------------------------------------------------------------------------------------------------------------|
| <p>Grille de Notification des Evénements Indésirables pour une Recherche Biomédicale portant sur un médicament ou un produit assimilé (Art. R. 1123-54 du Code de la Santé publique)<br/>09JFD-MYRE_grille-vigilance_v2_2_20120218.doc</p> | <p>ASSISTANCE PUBLIQUE HÔPITAUX DE PARIS</p>  | <p>Risque de la Recherche : <b>D</b></p> <p>Codes projet : P081226 – EudraCT : 2009-017926-38</p> <p>« TRAITEMENT DE LA NEPHROPATHIE A CYLINDRES MYELOMATEUX »</p> <p>CSI: Oui <input checked="" type="checkbox"/> Non <input type="checkbox"/></p> | <p><b>MYRE</b></p> <p>ANE PAS NOTIFIER AU PROMOTEUR</p> <p>Evénements recensés dans le protocole comme ne devant pas être notifiés mais qui pourront être recueillis dans le cahier d'observation (CRF)</p> <p><b>Effets Indésirables (EI) Non Graves ATTENDUS</b><br/>Connus pour être liés aux médicaments expérimentaux, au dispositif médical expérimental ou aux actes et procédures de la recherche (Réf : CTCAE v4.0)</p> <p><b>Liés au cyclophosphamide</b></p> <ul style="list-style-type: none"> <li>• Affections hématologiques et du système lymphatique.</li> <li>- Grade ≤ 2 : thrombopénie, neutropénie, hypoplaquettose, leucopénie, anémie.</li> </ul> <p>(Liste non exhaustive : se reporter au RCP d'Endoxan® en vigueur).</p> | <p><b>Evénements Indésirables Graves (EIG) ATTENDUS</b><br/>(Réf : CTCAE v4.0)</p> <p>- Grade ≥ 3 : hypersensibilité, angio-œdème</p> <p><b>(Liste non exhaustive : se reporter au RCP de Velcade® en vigueur).</b></p> <p><b>Liés au cyclophosphamide</b></p> <ul style="list-style-type: none"> <li>• Affections hématologiques et du système lymphatique.</li> <li>- Grade ≥ 3 : thrombopénie, neutropénie, hypoplaquettose, leucopénie, anémie.</li> <li>- Affections de la peau et du tissu sous-cutané</li> <li>- Syndrome de Stevens-Johnson, toxicémie nécrolysante.</li> <li>- Affections rénales :</li> <li>- Cystite hémorragique</li> </ul> <p><b>(Liste non exhaustive : se reporter au RCP d'Endoxan® en vigueur).</b></p> <p><b>Liés à l'hémisuccinate de methylprednisolone</b></p> <ul style="list-style-type: none"> <li>• Désordres hydro-électrolytiques</li> <li>- Rétention hydrosodée.</li> <li>- Grade ≤ 2 : hypokaliémie, alcalose métabolique, hypertension artérielle, insuffisance cardiaque congestive.</li> <li>• Affections endocriniennes et métaboliques</li> <li>- Atrophie corticosurrénale réversible.</li> <li>• Affections du système nerveux</li> <li>- Excitation</li> <li>- Grade ≤ 2 : euphorie, insomnie, accès d'allure maniaque, états confusionnels ou confuso-oniriques, état dépressif à l'arrêt du traitement.</li> <li>• Risque d'infection (grade ≤ 2)</li> </ul> <p>(Liste non exhaustive : se reporter au RCP de Medrol® en vigueur).</p> | <p><b>Effets Indésirables Graves (EIG) INATTENDUS (SUSARS)</b></p> <p>Notifier tous les événements présentant l'un des critères de gravité noté ci-dessous, à l'exception de ceux recensés dans le protocole comme ne devant pas être notifiés :</p> <ol style="list-style-type: none"> <li>1- Décès</li> <li>2- Mise en jeu du pronostic vital</li> <li>3- Nécessité ou prolonge l'hospitalisation</li> <li>4- Séquelles durables</li> <li>5- Anomalie ou malformation congénitale</li> <li>6- Evénement jugé grave par l'investigateur (raison à préciser)</li> </ol> <p><b>ATTENTION</b> : toute découverte d'une GROSSESSE au décours d'une recherche biomédicale doit être immédiatement déclarée au promoteur et fera l'objet d'un suivi jusqu'à l'accouchement.</p> <p>Notifier tous les événements présentant l'un des critères de</p> |
|--------------------------------------------------------------------------------------------------------------------------------------------------------------------------------------------------------------------------------------------|--------------------------------------------------------------------------------------------------------------------------------|-----------------------------------------------------------------------------------------------------------------------------------------------------------------------------------------------------------------------------------------------------|---------------------------------------------------------------------------------------------------------------------------------------------------------------------------------------------------------------------------------------------------------------------------------------------------------------------------------------------------------------------------------------------------------------------------------------------------------------------------------------------------------------------------------------------------------------------------------------------------------------------------------------------------------------------------------------------------------------------------------------------------|------------------------------------------------------------------------------------------------------------------------------------------------------------------------------------------------------------------------------------------------------------------------------------------------------------------------------------------------------------------------------------------------------------------------------------------------------------------------------------------------------------------------------------------------------------------------------------------------------------------------------------------------------------------------------------------------------------------------------------------------------------------------------------------------------------------------------------------------------------------------------------------------------------------------------------------------------------------------------------------------------------------------------------------------------------------------------------------------------------------------------------------------------------------------------------------------------------------------------------------------------------------------------------------------------------------------------------------------------------------------------------------------------------------------------------------------------------------------------------------------|------------------------------------------------------------------------------------------------------------------------------------------------------------------------------------------------------------------------------------------------------------------------------------------------------------------------------------------------------------------------------------------------------------------------------------------------------------------------------------------------------------------------------------------------------------------------------------------------------------------------------------------------------------------------------------------------------------------------------------------------------------------------------------------------------------------------------------------------|

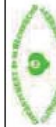

**MYRE**

Codes projet :  
 P081226 – EudraCT : 2009-017926-38

Risque de la Recherche : **D**

CSI: Oui  Non

« TRAITEMENT DE LA NEPHROPATHIE A CYLINDRES MYELOMATEUX »

| A NE PAS NOTIFIER AU PROMOTEUR<br>Evénements recensés dans le protocole comme ne devant pas être notifiés mais qui pourront être recueillis dans le cahier d'observation (CRF)                                                                                                                                                                                                                                                                                                                                                                                                                                                                                                                                                                                                                                                                                                                                                                                                                                                                                                                                          |                                                                                                                                                                                                                                                                                                                                                                                                                                                                                                                                                                                                                                                                                                                                                                                                                                                                                                                                                                                                                        | A NOTIFIER SANS DELAI AU PROMOTEUR<br>Envoi du formulaire de notification d'EIG par fax au 01 44 84-17 99 et à recueillir dans le CRF                                                                                                                                                                                                                                                                                                                                                                                                                                                                                                                                                                                                                                                                                                                                                                                               |                                                                                                                                                                                                                                                                                                                                                                                                                                                                                                                                                                                                                                            |
|-------------------------------------------------------------------------------------------------------------------------------------------------------------------------------------------------------------------------------------------------------------------------------------------------------------------------------------------------------------------------------------------------------------------------------------------------------------------------------------------------------------------------------------------------------------------------------------------------------------------------------------------------------------------------------------------------------------------------------------------------------------------------------------------------------------------------------------------------------------------------------------------------------------------------------------------------------------------------------------------------------------------------------------------------------------------------------------------------------------------------|------------------------------------------------------------------------------------------------------------------------------------------------------------------------------------------------------------------------------------------------------------------------------------------------------------------------------------------------------------------------------------------------------------------------------------------------------------------------------------------------------------------------------------------------------------------------------------------------------------------------------------------------------------------------------------------------------------------------------------------------------------------------------------------------------------------------------------------------------------------------------------------------------------------------------------------------------------------------------------------------------------------------|-------------------------------------------------------------------------------------------------------------------------------------------------------------------------------------------------------------------------------------------------------------------------------------------------------------------------------------------------------------------------------------------------------------------------------------------------------------------------------------------------------------------------------------------------------------------------------------------------------------------------------------------------------------------------------------------------------------------------------------------------------------------------------------------------------------------------------------------------------------------------------------------------------------------------------------|--------------------------------------------------------------------------------------------------------------------------------------------------------------------------------------------------------------------------------------------------------------------------------------------------------------------------------------------------------------------------------------------------------------------------------------------------------------------------------------------------------------------------------------------------------------------------------------------------------------------------------------------|
| Evénements pouvant être graves mais non liés aux médicaments expérimentaux (bortezomib, cyclophosphamide, méthylprednisolone, thalidomide), ni au dispositif médical expérimental (membrane Theralite™), ni aux actes et procédures ajoutés par la recherche                                                                                                                                                                                                                                                                                                                                                                                                                                                                                                                                                                                                                                                                                                                                                                                                                                                            | Effets Indésirables (EI) Non Graves ATTENDUS<br>Connus pour être liés aux médicaments expérimentaux, au dispositif médical expérimental ou aux actes et procédures de la recherche (Réf : CTCAE v4.0)                                                                                                                                                                                                                                                                                                                                                                                                                                                                                                                                                                                                                                                                                                                                                                                                                  | Evénements Indésirables Graves (EIG) ATTENDUS<br>(Réf : CTCAE v4.0)                                                                                                                                                                                                                                                                                                                                                                                                                                                                                                                                                                                                                                                                                                                                                                                                                                                                 | Effets Indésirables Graves (EIG) INATTENDUS (SUSARS)                                                                                                                                                                                                                                                                                                                                                                                                                                                                                                                                                                                       |
| <ul style="list-style-type: none"> <li>• Tout ce qui est en rapport avec l'évolution naturelle et habituelle de la pathologie :                             <ul style="list-style-type: none"> <li>- Insuffisance rénale sévère</li> <li>- Anurie</li> <li>- Syndrome d'hyperviscosité</li> <li>- Hypercalcémie</li> <li>- Hyperkaliémie</li> </ul> </li> <li>- Autres signes traduisant l'évolution de la maladie</li> <li>- Hospitalisation programmée ou non pour suivi de la pathologie</li> <li>• Effets indésirables éventuellement graves mais bien connus, très fréquents et bien maîtrisés dont la déclaration n'apporterait rien à la sécurité des patients (à ne pas notifier sauf si aggravation) :                             <ul style="list-style-type: none"> <li>- Aplasie médullaire post-chimiothérapie de grade <math>\leq 3</math> sans complication.</li> </ul> </li> <li>• Tout effet indésirable grave susceptible d'être lié aux traitements prescrits dans le cadre du soin pendant le suivi de la recherche.</li> <li>• Tout autre événement médical en dehors de la pathologie.</li> </ul> | <p>Liés au dispositif médical expérimental (Membrane Theralite™)</p> <ul style="list-style-type: none"> <li>- Fuite externe de sang</li> <li>- Fuite interne de sang dans le compartiment dialysat</li> <li>- Pénétration d'air dans le circuit du sang extra corporel n'entraînant pas d'embolie gazeuse</li> <li>- Coagulation à l'intérieur du dialyseur n'entraînant pas de thrombose</li> </ul> <p>Liés aux gestes de mise en œuvre du dispositif médical</p> <ul style="list-style-type: none"> <li>- Crampes musculaires</li> <li>- Sensations de brûlure, d'engourdissement et fourmillements</li> <li>- Infections locales n'entraînant pas de septicémie...</li> <li>- Fuite externe de sang</li> <li>- Pénétration d'air dans le circuit sang extracorporel n'entraînant pas d'embolie gazeuse</li> </ul> <p>Liés à la dialyse</p> <ul style="list-style-type: none"> <li>- Nausées, impression de « mal de mer »</li> <li>- Grade <math>\leq 2</math> : maux de tête, hypertension, hypotension</li> </ul> | <p>Liés au dispositif médical expérimental (Membrane Theralite™)</p> <ul style="list-style-type: none"> <li>- Pénétration d'air dans le circuit du sang extra corporel entraînant une embolie gazeuse</li> <li>- Coagulation à l'intérieur du dialyseur entraînant une thrombose</li> </ul> <p>Liés aux gestes de mise en œuvre du dispositif médical</p> <ul style="list-style-type: none"> <li>- Infections locales entraînant une septicémie, sepsis...</li> <li>- Pénétration d'air dans le circuit sang extracorporel entraînant une embolie gazeuse</li> </ul> <p>Liés à la dialyse</p> <ul style="list-style-type: none"> <li>- Réactions anaphylactiques (rash, collapsus...)</li> <li>- Grade <math>\geq 3</math> : maux de tête, hypertension, hypotension</li> </ul> <p>Information ANSM du 06/03/2012 :</p> <ul style="list-style-type: none"> <li>- Réaction allergique aigue pendant une séance de dialyse</li> </ul> | <p>gravité noté ci-dessous, à l'exception de ceux recensés dans le protocole comme ne devant pas être notifiés :</p> <ol style="list-style-type: none"> <li>1- Décès</li> <li>2- Mise en jeu du pronostic vital</li> <li>3- Nécessite ou prolonge l'hospitalisation</li> <li>4- Séquelles durables</li> <li>5- Anomalie ou malformation congénitale</li> <li>6- Evénement jugé grave par l'investigateur (raison à préciser)</li> </ol> <p><b>ATTENTION</b> : toute découverte d'une GROSSESSE au décours d'une recherche biomédicale doit être immédiatement déclarée au promoteur et fera l'objet d'un suivi jusqu'à l'accouchement.</p> |

## APPENDIX 15: SCHEDULE OF ASSESSMENTS

|                                                                 | Inclusion | Randomisation | Cycle 1 (J21) | Cycle 2 (J21) | Cycle 3 (J21) | Cycle 4 (J21) | Cycle 5 (J21) | Cycle 6 (J21) | Bilan 6 mois | Bilan 1 an |
|-----------------------------------------------------------------|-----------|---------------|---------------|---------------|---------------|---------------|---------------|---------------|--------------|------------|
| <b>Examen Clinique</b>                                          |           |               |               |               |               |               |               |               |              |            |
| Pouls                                                           | x         | x             | x             | x             | x             | x             | x             | x             | x            | x          |
| Pression artérielle                                             | x         | x             | x             | x             | x             | x             | x             | x             | x            | x          |
| Diurèse des 24 heures                                           | x         | x             | x             | x             | x             | x             | x             | x             | x            | x          |
| Poids                                                           | x         | x             | x             | x             | x             | x             | x             | x             | x            | x          |
| <b>Examens biologiques</b>                                      |           |               |               |               |               |               |               |               |              |            |
| NFS, plaquettes                                                 | x         | x             | x             | x             | x             | x             | x             | x             | x            | x          |
| Créatininémie, urée, Uricémie                                   | x         | x             | x             | x             | x             | x             | x             | x             | x            | x          |
| Ionogramme sanguin (Na, K, Cl, HCO3)                            | x         | x             | x             | x             | x             | x             | x             | x             | x            | x          |
| Calcémie, phosphorémie                                          | x         | x             | x             | x             | x             | x             | x             | x             | x            | x          |
| Albuminémie, CRP                                                | x         | x             | x             | x             | x             | x             | x             | x             | x            | x          |
| Bilan hépatique                                                 | x         | x             | x             | x             | x             | x             | x             | x             | x            | x          |
| Ionogramme urinaire (Na, K, Cl), urée, créatinine urinaires     | x         | x             | x             | x             | x             | x             | x             | x             | x            | x          |
| Protéinurie des 24 heures                                       | x         | x             | x             | x             | x             | x             | x             | x             | x            | x          |
| Bandelette urinaire (pH)                                        | x         | x             | x             | x             | x             | x             | x             | x             | x            | x          |
| Electrophorèse des protides (EP) sériques                       | x         | x             | x             | x             | x             | x             | x             | x             | x            | x          |
| Dosage des chaînes légères libres sériques                      | x         | x             | x             | x             | x             | x             | x             | x             | x            | x          |
| Electrophorèse des protides (EP) urinaire                       | x         |               | x             | x             | x             | x             | x             | x             | x            | x          |
| Immunofixation (IF) urinaire                                    | x         |               |               |               |               |               |               |               | x            | x          |
| β2 microglobuline                                               | x         |               |               |               |               |               |               |               |              |            |
| LDH                                                             | x         |               |               |               |               |               |               |               |              |            |
| Immunoélectrophorèse (IEP) ou immunofixation (IF) sérique*      | x         |               |               |               |               |               |               |               | x            | x          |
| IEP ou IF urinaires                                             | x         |               |               |               |               |               |               |               | x            | x          |
| Sérologies (HIV, hépatite B et C, herpes-varicelle-zona)        | x         |               |               |               |               |               |               |               | x            | x          |
| Test de grossesse (betaHCG) pour les femmes en âges de procréer | x         | x             | x             | x             | x             | x             | x             | x             | x            | x          |
| <b>Autres examens</b>                                           |           |               |               |               |               |               |               |               |              |            |
| Myélogramme ou biopsie ostéo-médullaire                         | x         |               |               |               |               |               |               |               | x            | x          |
| Radiographies du squelette **                                   | x         |               |               |               |               |               |               |               | x            | x          |
| Radiographie du poumon                                          | x         |               |               |               |               |               |               |               |              |            |
| Ponction biopsie rénale ***                                     | x         |               |               |               |               |               |               |               |              |            |

\* Serum should be stored for the entire duration of the study.

\*\* skull, spine, upper and lower limbs, pelvis

\*\*\* Kidney biopsy is mandatory for patients randomized in the hemodialysis part of the study

### MODALITIES OF HEMODIALYSIS MONITORING

The usual clinical surveillance will be applied, according to local practice. The following biological parameters will be measured:

- Before each dialysis session: serum Na, K, Cl, HCO<sub>3</sub>, calcium, phosphate, total protein, serum albumin, full blood count
- After each dialysis session: same parameters, except for full blood count
- Before and after the first 3 dialysis sessions, then once weekly before and after hemodialysis: serum free light chains

The monitoring of parameters for dialysis efficiency, such as percentage of urea reduction, ionic dialysance, and KT/V is recommended, as appropriate.

**APPENDIX 16: SEVERE ADVERSE EVENT REPORTING FORM**

**FORMULAIRE DE DECLARATION D'UN EVENEMENT  
INDESIRABLE GRAVE (EIG) SURVENANT AU COURS  
D'UNE RECHERCHE BIOMEDICALE SUR UN  
MEDICAMENT OU PRODUIT ASSIMILE  
EN HEMATOLOGIE**

ASSISTANCE PUBLIQUE  HÔPITAUX DE PARIS

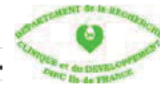

PARTIE RESERVEE AU PROMOTEUR : NE PAS REMPLIR

DRCD -

Cette fiche doit être retournée dûment complétée (3 pages) au DRCD par fax : +33 (0)1 44 84 17 99  
A l'attention de Damien Vanhoye et de Marie Castera

Date de notification :     |\_|\_|   |\_|\_|   |\_|\_|\_|\_|  
                                                  jj           mm           aaaa

Code de la Recherche : P081226

N° EudraCT : EUD2009-017926-38

Déclaration initiale  Suivi d'EIG déclaré  N° du suivi |\_|\_|

Titre de la Recherche Biomédicale :

**Traitement de la néphropathie à cylindres myelomateux - Etude MYRE**

1) Nom et adresse du centre : \_\_\_\_\_

Centre n° : |\_|\_|\_|\_|    Investigateur (Qualité - Nom - Prénom) : \_\_\_\_\_

**2) Identification du patient :**

Identifiant patient : |\_|\_|\_|\_| |\_|\_|\_|\_| |\_|\_|\_|  
(site + n° inclusion + initiales)

Sexe :                    Masculin    Féminin

Date de naissance :   |\_|\_|\_|\_|\_| |\_|\_|\_|\_|\_|

Poids :                 |\_|\_|\_| kg

Taille :                |\_|\_|\_| m

Date d'inclusion :     |\_|\_|\_|\_|\_| |\_|\_|\_|\_|\_|

Date de randomisation : |\_|\_|\_|\_|\_| |\_|\_|\_|\_|\_|

**3) Evénement indésirable grave :**

Décès

Nécessite ou prolonge l'hospitalisation :   
Du |\_|\_|\_|\_|\_|\_|\_|\_| au |\_|\_|\_|\_|\_|\_|\_|\_|  en cours

Incapacité ou invalidité

Anomalie congénitale

Autre(s) critère(s) médicalement significatif(s) (préciser) :   
\_\_\_\_\_  
\_\_\_\_\_

§ Arrêt prématuré des traitements : oui  non

Date d'arrêt : |\_|\_|\_|\_|\_| |\_|\_|\_|\_|\_|

Cause : \_\_\_\_\_  
\_\_\_\_\_

**4) Stratégie thérapeutique**

**A l'inclusion :**

Pas d'épuration extra-rénale

Epuration extra-rénale

**Bras de randomisation :**

BD  C-BD

HCO  Classique

Changement de stratégie    oui            non

Seconde randomisation    oui            non

HCO     Classique

Si oui, préciser la date : |\_|\_|\_|\_|\_| |\_|\_|\_|\_|\_|

Antécédents (allergie, insuffisance rénale ...): \_\_\_\_\_  
\_\_\_\_\_

Identification du patient : \_\_\_\_\_ Centre n° : \_\_\_\_\_ Code de la Recherche : P081226 -MYRE

5) Description complète de l'événement indésirable (diagnostic retenu, localisation anatomique, critères permettant de considérer l'événement comme grave) :

| Période d'apparition de l'événement | Date de début | Date de fin | En cours                 |
|-------------------------------------|---------------|-------------|--------------------------|
| Cure N° _____                       | _____         | _____       | <input type="checkbox"/> |

| Descriptif détaillé de l'événement indésirable grave | Grade <sup>1)</sup> | Date et Heure de début               | Evolution <sup>2)</sup> et Date et heure de fin                                                                                                                               |
|------------------------------------------------------|---------------------|--------------------------------------|-------------------------------------------------------------------------------------------------------------------------------------------------------------------------------|
|                                                      | _____               | _____<br>jj mm aa<br>_____<br>hh min | _____<br>évolution jj mm aa _____<br>hh min<br>Mesures symptomatiques prises : non <input type="checkbox"/> oui <input type="checkbox"/> Si oui, (préciser)<br>_____<br>_____ |
|                                                      | _____               | _____<br>jj mm aa<br>_____<br>hh min | _____<br>évolution jj mm aa _____<br>hh min<br>Mesures symptomatiques prises : non <input type="checkbox"/> oui <input type="checkbox"/> Si oui, (préciser)<br>_____<br>_____ |
|                                                      | _____               | _____<br>jj mm aa<br>_____<br>hh min | _____<br>évolution jj mm aa _____<br>hh min<br>Mesures symptomatiques prises : non <input type="checkbox"/> oui <input type="checkbox"/> Si oui, (préciser)<br>_____<br>_____ |
|                                                      | _____               | _____<br>jj mm aa<br>_____<br>hh min | _____<br>évolution jj mm aa _____<br>hh min<br>Mesures symptomatiques prises : non <input type="checkbox"/> oui <input type="checkbox"/> Si oui, (préciser)<br>_____<br>_____ |

|                                                                                                                                                                                                                   |                                                                                                                                                                                                                                                                                                                                                             |
|-------------------------------------------------------------------------------------------------------------------------------------------------------------------------------------------------------------------|-------------------------------------------------------------------------------------------------------------------------------------------------------------------------------------------------------------------------------------------------------------------------------------------------------------------------------------------------------------|
| <b>1) Grade de toxicité/sévérité :</b><br>1 = léger<br>2 = modéré<br>3 = sévère<br>4 = mise en jeu du pronostic vital<br>5 = décès lié à l'effet indésirable<br>Selon la classification du NCI (CTAE version 3.0) | <b>2) Evolution :</b><br>1 = guérison sans séquelle<br>2 = guérison avec séquelle<br>3 = aggravation de la sévérité/grade de la toxicité<br>4 = amélioration de la sévérité/grade de la toxicité<br>5 = en cours, sans traitement<br>6 = en cours, avec traitement<br>7 = décès dû à l'effet indésirable<br>8 = décès sans rapport avec l'effet indésirable |
|-------------------------------------------------------------------------------------------------------------------------------------------------------------------------------------------------------------------|-------------------------------------------------------------------------------------------------------------------------------------------------------------------------------------------------------------------------------------------------------------------------------------------------------------------------------------------------------------|

Commentaires : si possible joindre une copie du compte rendu d'hospitalisation ou tout résultat pertinent de tests diagnostics

\_\_\_\_\_  
 \_\_\_\_\_  
 \_\_\_\_\_

6) Médicament(s) expérimental (aux) administré(s) avant la survenue de l'événement indésirable :

| Nom commercial (de préférence) ou Dénomination Commune Internationale | Voie | Dose/24h | Date de début | En cours                 | Date de fin | Indication | Causalité * (1,2,3 ou 4) |
|-----------------------------------------------------------------------|------|----------|---------------|--------------------------|-------------|------------|--------------------------|
|                                                                       |      |          | _____         | <input type="checkbox"/> | _____       |            |                          |
|                                                                       |      |          | _____         | <input type="checkbox"/> | _____       |            |                          |
|                                                                       |      |          | _____         | <input type="checkbox"/> | _____       |            |                          |
|                                                                       |      |          | _____         | <input type="checkbox"/> | _____       |            |                          |

\* 1 = Probable    2 = Possible    3 = Non liée    4 = Inconnue

Identification du patient : \_\_\_\_\_ Centre n°: \_\_\_\_\_ Code de la Recherche : P081226 -MYRE

7) Médicament(s) concomitant(s) à l'exclusion de ceux utilisés pour traiter l'événement indésirable :

| Nom commercial (de préférence) ou Dénomination Commune Internationale | Voie | Dose/24h | Date de début                           | En cours                 | Date de fin                   | Indication | Causalité * (1,2,3 ou 4) |
|-----------------------------------------------------------------------|------|----------|-----------------------------------------|--------------------------|-------------------------------|------------|--------------------------|
|                                                                       |      |          | ____ ____ ____ ____ ____ ____ ____ ____ | <input type="checkbox"/> | ____ ____ ____ ____ ____ ____ |            |                          |
|                                                                       |      |          | ____ ____ ____ ____ ____ ____ ____ ____ | <input type="checkbox"/> | ____ ____ ____ ____ ____ ____ |            |                          |
|                                                                       |      |          | ____ ____ ____ ____ ____ ____ ____ ____ | <input type="checkbox"/> | ____ ____ ____ ____ ____ ____ |            |                          |
|                                                                       |      |          | ____ ____ ____ ____ ____ ____ ____ ____ | <input type="checkbox"/> | ____ ____ ____ ____ ____ ____ |            |                          |

\* 1 = Probable    2 = Possible    3 = Non liée    4 = Inconnue

8) Description du dispositif médical (DM) impliqué, le cas échéant :

| Nature | Modèle /type/référence | N° de série ou de lot | Nom du fournisseur | Nom du fabricant | Si DM stérile :<br>Date de stérilisation et<br>Date de péremption | Causalité * (1,2,3 ou 4) |
|--------|------------------------|-----------------------|--------------------|------------------|-------------------------------------------------------------------|--------------------------|
|        |                        |                       |                    |                  | ____ ____ ____ ____  et<br>____ ____ ____ ____                    |                          |

\* 1 = Probable    2 = Possible    3 = Non liée    4 = Inconnue

Si accessoire, consommable :

| Désignation | Modèle | N° de série ou de lot | Nom du fabricant | Date de péremption  |
|-------------|--------|-----------------------|------------------|---------------------|
|             |        |                       |                  | ____ ____ ____ ____ |

9) Autre(s) étiologie(s) envisagée(s) :    non  oui  Si oui, préciser :

\_\_\_\_\_  
\_\_\_\_\_  
\_\_\_\_\_

10) Examen(s) complémentaire(s) réalisé(s) : non  oui  Si oui, préciser date, nature et résultats :

\_\_\_\_\_  
\_\_\_\_\_  
\_\_\_\_\_

11) Traitements de la Recherche Biomédicale :

Ré-administration du (des) médicament(s) :    non  oui  non applicable  date : \_\_\_\_|\_\_\_\_|\_\_\_\_|\_\_\_\_|

Si oui, le(s) quel(s) : \_\_\_\_\_

Récidive après ré-administration :    non  oui  non applicable  date : \_\_\_\_|\_\_\_\_|\_\_\_\_|\_\_\_\_|
