# Supplementary material
Source: PubMed Central journal article supplement (PMC5820717)
Supplement: jama-318-2099-s002.pdf [file jama-318-2099-s002.pdf]

## Prospective multicenter study MYRE

### Treatment of myeloma cast nephropathy – MYRE P081226

|                                                   |                                                                                                                                                                                                                                                                          |
|---------------------------------------------------|--------------------------------------------------------------------------------------------------------------------------------------------------------------------------------------------------------------------------------------------------------------------------|
| <b>Indication</b>                                 | Renal failure and monoclonal gammopathy                                                                                                                                                                                                                                  |
| <b>Study name</b>                                 | MYRE                                                                                                                                                                                                                                                                     |
| <b>Type of study</b>                              | Prospective multicenter study                                                                                                                                                                                                                                            |
| <b>Version and date</b>                           | Version n°1, July 20, 2010                                                                                                                                                                                                                                               |
| <b>Coordinating Investigator</b>                  | Prof. Jean Paul FERMAND<br>Department of Hematology and Immunology<br>Hôpital Saint Louis, Paris                                                                                                                                                                         |
| <b>Associate coordinating investigator</b>        | Prof. Frank BRIDOUX<br>Department of Nephrology<br>CHU Poitiers                                                                                                                                                                                                          |
| <b>Sponsor</b>                                    | Assistance Publique-Hôpitaux de Paris<br>Department of Clinical Research and<br>Development, Hôpital Saint Louis, 75010 Paris                                                                                                                                            |
| <b>Project manager</b>                            | Damien VANHOYE<br>Tel: (33) 1 44 84 17 48, Fax: (33) 1 44 84 17 99<br>damien.vanhoye@sls.aphp.fr                                                                                                                                                                         |
| <b>Clinical research unit<br/>Data management</b> | Clinical Resarch Unit, GH Saint Louis-Lariboisière<br>(Antenne Saint Louis)<br>Secretary: Sabrina DUBIEF<br>Tel: (33) 1 42 49 97 42, Fax: (33) 1 42 49 97 45<br>sec.dbim@univ-paris-diderot.fr                                                                           |
| <b>Clinical Research Assistants (CRA)</b>         | Malika YAHMI, Amel GABSI<br>Clinical Research Unit, GH Saint Louis<br>Lariboisière, Paris (Antenne Saint Louis)<br>Tel: (33)142385292/5274 Fax: (33)142385325<br>Anne LEA (Poitiers)<br>Department of Nephrology, CHU Poitiers<br>Tel: (33)549443075, Fax: (33)549443077 |
| <b>Statistician</b>                               | Sylvie CHEVRET<br>Department of Biostatistics and Medical<br>Information, Hôpital Saint Louis, Paris                                                                                                                                                                     |
| <b>Supervision Committee</b>                      | Pierre RONCO (Paris), A. JACCARD (Limoges),<br>B. MOULIN (Strasbourg), C. COMBE (Bordeaux),<br>P. MOREAU (Nantes), Michel ATTAL (Toulouse)                                                                                                                               |

PAGE de SIGNATURE D'UN PROTOCOLE de recherche biomédicale  
par l'investigateur COORDONNATEUR et le représentant du PROMOTEUR

Recherche biomédicale N°P081226

**Titre : Traitement de la néphropathie à cylindres myéломateux  
Etude MYRE**

Version N° 1-0 du : 20/07/2010

L'investigateur coordonnateur  
**Professeur Jean-Paul FERMAND**  
Service d'Hémo-Immunoologie  
HOPITAL SAINT-LOUIS  
1 AV CLAUDE VELLEFAUX  
75010 PARIS

Date : 22/08/2010  
Signature : 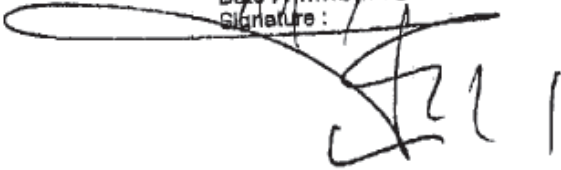

Le promoteur :

Assistance publique - hôpitaux de Paris  
Délégation interrégionale à la Recherche Clinique  
Hôpital Saint Louis  
75010 PARIS

Date : 06/10/2010  
Département de la Recherche Clinique  
et du Développement  
Signature :   
Christophe MISSE  
Directeur

**NB : cette version correspond au texte du protocole et annexes adressés au CPP  
et à l'autorité compétente respectivement pour avis et demande d'autorisation et aux  
autres interlocuteurs de recherche (directeurs d'hôpitaux...).**

*Si ensuite une autre version est rédigée suite à des modifications, il faut refaire le circuit des  
signatures afin d'être toujours à jour des versions du protocole actif.*

## Table of contents

---

|                                                                                               |           |
|-----------------------------------------------------------------------------------------------|-----------|
| <b>STUDY SUMMARY</b> .....                                                                    | <b>5</b>  |
| <b>1. RATIONALE</b> .....                                                                     | <b>7</b>  |
| A) <i>SYMPTOMATIC TREATMENT</i> .....                                                         | 8         |
| B) <i>CHEMOTHERAPY</i> .....                                                                  | 9         |
| <b>2. STUDY OBJECTIVES</b> .....                                                              | <b>10</b> |
| <b>3. STUDY DESIGN</b> .....                                                                  | <b>10</b> |
| A) <i>INCLUSION/SCREENING PERIOD</i> .....                                                    | 10        |
| B) <i>RANDOMIZATION</i> .....                                                                 | 11        |
| <b>4. RANDOMIZATION PROCEDURE</b> .....                                                       | <b>12</b> |
| <b>5. PART 1: TREATMENT OF PATIENTS NOT REQUIRING HEMODIALYSIS</b> .....                      | <b>13</b> |
| A) <i>MODALITIES OF TREATMENT WITH BORTEZOMIB-DEXAMETHASONE (BD GROUP)</i> .....              | 13        |
| B) <i>MODALITIES OF TREATMENT WITH CYCLOPHOSPHAMIDE-BORTEZOMIB-DEXAMETHASONE (C-BD)</i> ..... | 15        |
| <b>6. PART 2: TREATMENT OF PATIENTS REQUIRING HEMODIALYSIS</b> .....                          | <b>17</b> |
| A) <i>MODALITIES OF HEMODIALYSIS SESSIONS</i> .....                                           | 18        |
| «HCO» group.....                                                                              | 18        |
| Control group.....                                                                            | 18        |
| B) <i>MODALITIES OF HEMODIALYSIS MONITORING</i> .....                                         | 18        |
| C) <i>MODALITIES OF CHEMOTHERAPY IN HEMODIALYSIS PATIENTS</i> .....                           | 19        |
| <b>7. INITIAL EVALUATION, COMPLEMENTARY INVESTIGATIONS</b> .....                              | <b>20</b> |
| A) <i>INITIAL EVALUATION</i> .....                                                            | 20        |
| B) <i>FOLLOW-UP EVALUATION</i> .....                                                          | 21        |
| <b>8. JUDGEMENT CRITERIA</b> .....                                                            | <b>22</b> |
| A) <i>PRIMARY OUTCOME</i> .....                                                               | 22        |
| B) <i>SECONDARY OUTCOMES</i> .....                                                            | 22        |
| <b>9. STATISTICS</b> .....                                                                    | <b>22</b> |
| A) <i>COMPUTATION OF SAMPLE SIZE</i> .....                                                    | 22        |
| B) <i>STATISTICAL ANALYSIS</i> .....                                                          | 22        |
| <b>10. SAFETY EVALUATION</b> .....                                                            | <b>23</b> |
| <b>11. PROCEDURES OF TEMPORARY OR PERMANENT TREATMENT INTERRUPTION</b> .....                  | <b>26</b> |
| <b>12. CASE REPORT FORM</b> .....                                                             | <b>27</b> |
| <b>13. ETHICAL CONSIDERATIONS</b> .....                                                       | <b>27</b> |
| <b>14. DATA PROCESSING AND STORAGE</b> .....                                                  | <b>28</b> |
| <b>15. ACCESS RIGHTS AND SOURCE DOCUMENTS</b> .....                                           | <b>29</b> |
| <b>16. QUALITY CONTROL AND ASSURANCE</b> .....                                                | <b>29</b> |
| <b>17. FUNDING AND INSURANCE</b> .....                                                        | <b>30</b> |

|                                                                                                                  |           |
|------------------------------------------------------------------------------------------------------------------|-----------|
| <b>18. FINAL RESEARCH REPORT.....</b>                                                                            | <b>30</b> |
| <b>19. DATA PUBLICATION RULES AND INTELLECTUAL PROPERTY RIGHTS.....</b>                                          | <b>30</b> |
| <b>20. REFERENCES .....</b>                                                                                      | <b>31</b> |
| APPENDIX 1. EVALUATION OF RENAL FUNCTION.....                                                                    | 34        |
| APPENDIX 2. AKIN (ACUTE KIDNEY INJURY NETWORK) CLASSIFICATION/STAGING SYSTEM FOR ACUTE KIDNEY INJURY.....        | 35        |
| APPENDIX 3. HEMATOLOGIC RESPONSE CRITERIA.....                                                                   | 36        |
| APPENDIX 4: C-VTD REGIMEN.....                                                                                   | 37        |
| APPENDIX 5: DURIE SALMON AND ISS STAGING SYSTEMS FOR MULTIPLE MYELOMA.....                                       | 38        |
| APPENDIX 6: ECOG PERFORMANS STATUS.....                                                                          | 39        |
| APPENDIX 7: NEW YORK HEART ASSOCIATION (NYHA) FUNCTIONAL CLASSIFICATION SYSTEM FOR CONGESTIVE HEART FAILURE..... | 40        |
| APPENDIX 8: LIST OF PARTICIPATING CENTRES.....                                                                   | 41        |
| APPENDIX 9: STUDY SYNOPSIS –INCLUSION/SCREENING PERIOD PRIOR TO RANDOMIZATION.....                               | 51        |
| APPENDIX 10: STUDY SYNOPSIS –PATIENTS NOT REQUIRING HEMODIALYSIS: RANDOMIZATION OF CHEMOTHERAPY.....             | 52        |
| APPENDIX 11: STUDY SYNOPSIS – PATIENTS REQUIRING HEMODIALYSIS: RANDOMIZATION OF DIALYSIS MEMBRANE.....           | 53        |
| APPENDIX 12: SUMMARY OF PRODUCT CHARACTERISTICS.....                                                             | 54        |
| APPENDIX 13: CLASSIFICATION OF ADVERSE EVENTS.....                                                               | 115       |
| APPENDIX 14: SCHEDULE OF ASSESSMENTS.....                                                                        | 117       |
| APPENDIX 15: SERIOUS ADVERSE EVENT REPORTING FORM.....                                                           | 118       |

## STUDY SUMMARY

### PROSPECTIVE MULTICENTER STUDY MYRE: Treatment of myeloma cast nephropathy

|                                            |                                                                                                                                                                                                                                                                                                                                                                                                                                                                                                                                                                                                                                                                                                                                                                                                                                      |
|--------------------------------------------|--------------------------------------------------------------------------------------------------------------------------------------------------------------------------------------------------------------------------------------------------------------------------------------------------------------------------------------------------------------------------------------------------------------------------------------------------------------------------------------------------------------------------------------------------------------------------------------------------------------------------------------------------------------------------------------------------------------------------------------------------------------------------------------------------------------------------------------|
| <b>STUDY OBJECTIVES</b>                    | In patients with multiple myeloma (MM) complicated with inaugural renal failure secondary to myeloma cast nephropathy (MCN), to evaluate the effect on renal function of: <ul style="list-style-type: none"> <li>- bortezomib (Velcade<sup>®</sup>) plus dexamethasone (Neodex<sup>®</sup>) (BD), compared with cyclophosphamide (Endoxan<sup>®</sup>), plus bortezomib and dexamethasone (C-BD), in patients not requiring hemodialysis.</li> <li>- an intensive hemodialysis regimen using either a dialyzer with very high permeability to proteins (Theralite<sup>TM</sup>), or a conventional high-flux dialyzer, combined with chemotherapy with BD, in patients requiring hemodialysis.</li> </ul>                                                                                                                            |
| <b>Coordinating Investigator</b>           | <b>Prof Jean Paul FERMAND, Department of Clinical Immunology, Hôpital Saint Louis, Paris</b>                                                                                                                                                                                                                                                                                                                                                                                                                                                                                                                                                                                                                                                                                                                                         |
| <b>Associate Coordinating Investigator</b> | <b>Prof Frank BRIDOUX, Department of Nephrology, University Hospital Poitiers</b>                                                                                                                                                                                                                                                                                                                                                                                                                                                                                                                                                                                                                                                                                                                                                    |
| <b>EXPERIMENTAL PLAN</b>                   | Prospective randomized multicenter controlled trial with two parallel groups stratified according to the requirement of hemodialysis                                                                                                                                                                                                                                                                                                                                                                                                                                                                                                                                                                                                                                                                                                 |
| <b>NUMBER OF PATIENTS</b>                  | 284 patients (including 93 x 2 not requiring dialysis and 49 x 2 requiring hemodialysis)                                                                                                                                                                                                                                                                                                                                                                                                                                                                                                                                                                                                                                                                                                                                             |
| <b>NUMBER OF CENTRES</b>                   | 50                                                                                                                                                                                                                                                                                                                                                                                                                                                                                                                                                                                                                                                                                                                                                                                                                                   |
| <b>CRITERIA OF RANDOMIZATION</b>           | <ol style="list-style-type: none"> <li>1. Renal failure (serum creatinine &gt;170 µmol/l and/or estimated glomerular filtration rate (eGFR) calculated using the MDRD equation &lt;40 ml/min/1.73m<sup>2</sup>).</li> <li>2. Secondary to MCN, probable (albumin &lt;30% of total urine protein, albuminuria &lt;500 mg/24h and urine albumin/creatinine ratio &lt;300 mg/g), or biopsy-proven.</li> <li>3. Established diagnosis of multiple myeloma, with measurable serum monoclonal Ig by conventional electrophoresis, and/or Bence Jones proteinuria &gt;0.5g/24h, and/or serum free LC level &gt;2 x upper limit of normal (ULN), with abnormal kappa/lambda ratio.</li> <li>4. Absolute neutrophil count ≥1.0 x 10<sup>9</sup>/L and platelet count ≥70 x 10<sup>9</sup>/L.</li> <li>5. Written informed consent.</li> </ol> |
| <b>CRITERIA OF NON-RANDOMIZATION</b>       | <ol style="list-style-type: none"> <li>1. Biopsy-proven AL amyloidosis.</li> <li>2. Severe pre-existing chronic kidney disease with eGFR &lt;30 ml/min/1.73 m<sup>2</sup>, not related to MM.</li> <li>3. Concomitant severe disease, including cancer (other than MM and with the exception of localized skin cancer such as basocellular carcinoma or squamous cell carcinoma) or non-malignant conditions.</li> <li>4. Positive HIV serology, active hepatitis B or hepatitis C infection, or active herpes/VZV viral infection.</li> <li>5. Patient treated with more than one course of anti-myeloma chemotherapy, and/or who received corticosteroid treatment with a total dose equivalent to more than 160 mg of dexamethasone, or more than 1 mg/kg/day of prednisone during 1 month.</li> </ol>                            |

|                            |                                                                                                                                                                                                                                                                                                                                                                                                                                                                                                                                                                                                                                                                                                                                                                                                                                                                                                                                                                                                                                                                                                                                                                                                                     |
|----------------------------|---------------------------------------------------------------------------------------------------------------------------------------------------------------------------------------------------------------------------------------------------------------------------------------------------------------------------------------------------------------------------------------------------------------------------------------------------------------------------------------------------------------------------------------------------------------------------------------------------------------------------------------------------------------------------------------------------------------------------------------------------------------------------------------------------------------------------------------------------------------------------------------------------------------------------------------------------------------------------------------------------------------------------------------------------------------------------------------------------------------------------------------------------------------------------------------------------------------------|
|                            | <p>6. Hepatic insufficiency, AST (SGOT) and ALT (SGPT) &gt;10 x ULN and/or persistent cholestasis (alkaline phosphatases or gammaGT &gt;5 x ULN).</p> <p>7. Severe preexisting peripheral neuropathy.</p> <p>8. Any contraindication to high-dose steroids.</p> <p>9. Any contraindication to bortezomib treatment.</p> <p>10. Patient without affiliation to the French National Security system.</p> <p>11. Inability to comply with study procedures.</p> <p>12. In women of child bearing potential, a positive pregnancy test or breast feeding.</p>                                                                                                                                                                                                                                                                                                                                                                                                                                                                                                                                                                                                                                                           |
| <b>PRIMARY ENDPOINT</b>    | <p>Improvement in renal function after 3 cycles of chemotherapy (at the latest 3 months after randomization), as evaluated by:</p> <ul style="list-style-type: none"> <li>- in patients requiring hemodialysis: the rate of hemodialysis independence</li> <li>- in patients not requiring hemodialysis: the rate of renal response defined by achievement of serum creatinine level <math>\leq 170 \mu\text{mol/l}</math> and/or estimated glomerular filtration rate (GFR) calculated using the modified MDRD equation <math>\geq 40 \text{ ml/min/1.73m}^2</math> (i.e., renal function compatible with eligibility for intensive treatment of MM)</li> </ul>                                                                                                                                                                                                                                                                                                                                                                                                                                                                                                                                                    |
| <b>SECONDARY ENDPOINTS</b> | <ul style="list-style-type: none"> <li>• Improvement in renal function (same criteria) after 1 cycle of chemotherapy, after completion of the studied chemotherapy protocol, at 6 months and 1 year after randomization.</li> <li>• Complete renal recovery, defined by return to baseline level of serum creatinine or eGFR (if known), or by eGFR <math>\geq 60 \text{ ml/min/1.73m}^2</math> after 1 and 3 cycles of chemotherapy, after completion of the studied chemotherapy protocol, at 6 months and 1 year after randomization.</li> <li>• Renal function, as evaluated by calculation of eGFR after 1 and 3 cycles of chemotherapy, after completion of the studied chemotherapy protocol, at 6 months and 1 year after randomization.</li> <li>• Hematologic response, after 1 and 3 cycles of chemotherapy, after completion of the studied chemotherapy protocol, at 6 months and 1 year after randomization.</li> <li>• Relapse-free survival, event-free survival and time to subsequent myeloma therapy, measured from randomization.</li> <li>• 12 month-overall survival.</li> <li>• Tolerance to treatment, particularly incidence of hematologic and peripheral nerve complications.</li> </ul> |
| <b>DURATION OF STUDY</b>   | <p>Total duration: 4 years<br/> Duration of the inclusion period: 3 years<br/> Duration of participation and follow-up: 1 year</p>                                                                                                                                                                                                                                                                                                                                                                                                                                                                                                                                                                                                                                                                                                                                                                                                                                                                                                                                                                                                                                                                                  |

## 1. RATIONALE

Renal failure is a severe and frequent complication in multiple myeloma (MM), occurring in nearly half of the patients during the course of the disease (Rayner 1991, Rota 1987). In more than two third of the cases, renal failure results from myeloma cast nephropathy (MCN) due to cast precipitation in the renal distal tubule lumens, secondary to the interaction of monoclonal immunoglobulin (Ig) light chains (LC) with uromodulin (Tamm-Horsfall protein) (Pirani 1987, Rota 1987, Sakhuja 2000). Ig LC, which are freely filtered through the glomerulus, are physiologically reabsorbed in the proximal tubular cells, through a mechanism of endocytosis mediated by a tandem of receptors (cubilin and megalin), and then degraded in the lysosomal compartment of the proximal tubular cell (Birn 2006). Therefore, MCN is nearly always observed in the context of high-grade MM, with production of large amounts of Ig LC exceeding the capacity of proximal tubular catabolism. Renal failure in MCN results not only from tubular obstruction by LC casts, but also from severe tubulo-interstitial inflammation, characterized by infiltrates of macrophages, mononuclear cells and giant cells around casts, resulting in major damage of the tubulo-interstitial compartment (Pirani 1987). Tubulo-interstitial inflammation is enhanced by massive proximal tubular reabsorption of monoclonal LC, leading to phosphorylation of MAP kinases (p38 MAPK) and activation of transcription factors (NF- $\kappa$ B, AP-1) that generate local production of pro-inflammatory cytokines such as tumor necrosis factor (TNF)- $\alpha$ , interleukin 6 and 8, and monocyte-chemoattractant protein (MCP)-1 (Batuman 2007). Cellular injury is accompanied by morphologic and functional alterations of proximal tubular cells, including epithelial-mesenchymal transition (Li 2008). MCN is usually triggered by various facilitating factors, namely dehydration, hypercalcemia, infections, contrast media, or nephrotoxic drugs (non-steroidal anti-inflammatory agents, diuretics, angiotensin converting-enzyme inhibitors, or angiotensin receptor antagonists). The risk of MCN is also influenced by the amount of monoclonal light chains excreted in the urine, and it is particularly high in MM patients with Bence Jones proteinuria over 2 g/day (Cohen 1984, Ronco 2001).

MCN usually presents as acute or sub-acute renal failure, isolated or sometimes associated with general symptoms related to high tumour mass MM, such as skeletal pains secondary to lytic bone lesions.

Renal prognosis of MCN remains poorly defined, with sometimes inconsistent data in the literature, mainly due to the lack of histopathological confirmation of renal lesions in most series. Furthermore, some of these series are old and in most cases, chemotherapy regimens varied greatly, including low or high-dose steroids. Moreover, renal response was usually not correlated with hematologic response assessed using modern tools, such as nephelometric assays for serum free LC. It is usually considered that renal function improves with treatment of MM in 50 to 60% of patients (Knudsen 2000), and in only 20 to 40% of those who require dialysis support (Clark 2005, Chanan-Khan 2007). Recent data suggest that these results might be significantly improved with the use of modern chemotherapy agents such as bortezomib or thalidomide, combined with high-dose dexamethasone (Tosi 2004, Ludwig 2007, Kastiris 2007). It is generally assumed that persistence of renal failure despite chemotherapy is predictive of poor patient survival in MM. Indeed, in a retrospective series published in 1998, median survival was only 4 months in patients with persistent renal impairment, compared to 28 months in patients who experienced renal recovery after chemotherapy (Bladé 1998).

Treatment of MCN relies on symptomatic measures and on the introduction of chemotherapy aiming at rapidly controlling the production of monoclonal LC by malignant plasma cells.

## **A) SYMPTOMATIC TREATMENT**

Symptomatic treatment is a key step in the management of MCN. It is based on the correction of precipitating factors (vigorous rehydration, correction of hypercalcemia and treatment of infections) with administration of sodium bicarbonate to obtain a urine pH  $\geq 7$ . Indeed, acidic urine promotes the formation of myeloma casts, by enhancing homotypic aggregation of Tamm-Horsfall protein, and its interaction with urine free LC. Some reducing agents such as colchicine might theoretically inhibit the aggregation of Tamm-Horsfall protein with monoclonal LC but their benefit in clinical use remains unproven (Sanders 1992, Ronco 2001).

Rapid removal of circulating monoclonal LC, through plasmapheresis or intensive hemodialysis using new protein-leaking dialyzers with high permeability to proteins, could also represent an interesting treatment strategy in MCN. In a randomized controlled study of 107 patients with acute renal failure (which type was not confirmed histologically) contemporary to the diagnosis of MM, plasmapheresis (5 to 7 exchanges of 50 ml/kg body weight) coupled with a chemotherapy regimen based on VAD (vincristine-adriamycine-dexamethasone), or melphalan plus prednisone, did not show a significant effect on a composite criterion defined by death, or dialysis-dependent renal failure, or severe renal failure with a glomerular filtration rate  $< 30 \text{ ml/min/1.73 m}^2$ , compared to chemotherapy alone (Clark 2005). Recently, Leung et al. have suggested that histological confirmation of MCN is critical to correctly interpret the effects of therapy in MM patients with renal failure. In a retrospective series of 40 patients, kidney biopsy, performed in 28 cases, showed pure MCN in 18 patients. Only in patients with biopsy-proven MCN, the combination of plasmapheresis with high-dose dexamethasone based chemotherapy induced improvement in renal function in 45% of patients and in 75 % of those whose serum free LC levels decreased by more than 50% with treatment. By contrast, no correlation between renal response and reduction in serum free LC levels was observed in patients without biopsy-proven MCN (Leung 2008). These data indicate that pathological confirmation of the nature of renal lesions is important to evaluate the impact of therapy in MM patients with renal failure.

Recently, it was shown that an extended hemodialysis protocol, using a new generation dialyzer with very high permeability to proteins (Gambro HCO 1100™), was highly efficient in removing circulating free LC (with 35 to 70% reduction of serum free LC levels after 2 hours of hemodialysis) in patients with MM and severe renal failure. The authors tested a daily hemodialysis treatment strategy using this membrane as a complementary therapy in 5 patients with biopsy-proven MCN. Duration of dialysis sessions ranged between 2 to 12 hours, and in some cases, 2 or 3 dialyzers in series were used after the first or second dialysis sessions. Among the 5 patients, who all received various chemotherapy regimens containing dexamethasone, improvement of renal function with subsequent dialysis withdrawal was achieved in 3. Clinical tolerance of extended dialysis with the protein-leaking dialyzer HCO 1100™ was good, despite the fact, that, on account of the high membrane permeability to large molecules, a perfusion of 20 to 40 g of albumin was required at the end of each dialysis session (Hutchison 2007). In a subsequent series of 19 patients, a similar hemodialysis regimen associated with conventional chemotherapy based on cyclophosphamide (7 patients), thalidomide (14 patients), vincristin/doxorubicin (1 patient), and high-dose dexamethasone (all patients), induced a significant reduction in the concentration of serum free LC in 13 patients (median reduction rate of 85%, range: 50 to 97%). In these 13 patients, hemodialysis was withdrawn after 4 weeks (median time 27 days, range: 13 to 120 days). In 6 patients, chemotherapy was stopped because of recurrent infectious complications: renal recovery occurred in one patient at day 105, whereas the 5 remaining patients were still dialysis-dependent. Survival of patients free of dialysis was significantly higher in this series (Hutchison 2009).

Preliminary data from case reports indicate that daily dialysis sessions of 4 to 6 hours, using a single HCO 1100™ dialyzer instead of 2 dialyzers in series, might be sufficient to obtain efficient removal of circulating LC and improvement in renal function (Bachmann 2008). The real benefit of this



new dialysis strategy in patients remains to be confirmed in large randomized trials dedicated to MM patients with severe renal failure and biopsy-proven MCN.

## **B). CHEMOTHERAPY**

The choice and modalities of initial chemotherapy in patients with MCN remain poorly defined. Rapid introduction of treatment, immediately after diagnostic confirmation, is essential to obtain a swift and profound reduction in the rate of production of monoclonal LC and to induce a renal response, a key prognostic factor for patient survival.

In young patients, improvement or recovery of renal function is also mandatory for consideration of eligibility for high-dose therapy, which is currently considered as the standard of care of symptomatic MM in this population. Intensive therapy usually consists of few courses of « classical » chemotherapy, followed by bone marrow stem cell mobilization through injections of growth factor with or without chemotherapy, stem cell collection, and then high-dose chemotherapy (usually based on an injection of 200 mg/m<sup>2</sup> of melphalan) and re-injection of bone marrow stem cells. In patients over 65 years in age, who are not eligible to intensive therapy, the reference treatment consists either in classical 4-day monthly courses of melphalan plus prednisone per-os associated with daily low-dose thalidomide (Facon 2007), or in the oral melphalan plus prednisone regimen reinforced by bortezomib (San Miguel 2008).

Most randomized controlled studies that demonstrated a benefit of intensive treatment compared to standard chemotherapy did not include patients with impaired renal function (usually defined as a serum creatinine level >150 µmol/L). Small series have shown that intensive treatment is feasible in myeloma patients with chronic renal failure, even in patients requiring chronic hemodialysis, but with significantly higher morbidity and mortality rates (Badros 2001, Knudsen 2005). In patients with dialysis-dependent renal failure, high dose therapy allows recovery of renal function in only few cases (Lee 2004). To date, the benefit over risk ratio of intensive therapy in myeloma patients with persistent renal failure remains uncertain and its indication and modalities are far from being established. Furthermore, even the choice of first-line chemotherapy in patients with multiple myeloma and inaugural renal failure is still poorly defined. Because of its anti-inflammatory properties, high-dose dexamethasone is considered as mandatory (Kastritis 2007). However, little attention has been paid to the agents that should be associated with high-dose steroids in this situation. Renal elimination of many agents used in the treatment of MM limits their use in patients with renal failure: for example, if an alkylating agent is considered, cyclophosphamide should be preferred to melphalan. The VAD regimen (Vincristine, Doxorubicin, Dexamethasone) has been widely employed, despite cardiac toxicity associated with doxorubicin and peripheral nerve complications with vincristine (Haubitz 2006).

The recent introduction of novel agents, initially thalidomide, then the proteasome-inhibitor bortezomib, and, more recently, lenalidomide (Revlimid®), has modified the strategy of initial chemotherapy in MM with renal failure. Metabolism of thalidomide in patients with renal failure is poorly defined. Due to the risk of central nervous system side-effects, including seizures, thalidomide dose should not exceed 200 mg/day. Moreover, serum potassium levels should be closely monitored, as severe hyperkalemia has been described in thalidomide-treated myeloma patients with advanced renal failure (Fakhouri 2004). Bortezomib may be used without dose adaptation for the treatment of MM with renal failure, even in patients requiring hemodialysis, with safety and efficacy profiles similar to MM patients with preserved renal function (Jagannath 2005, Chanan-Khan 2007, San Miguel 2008). Bortezomib-related side effects mainly involve gastro-intestinal tract, bone marrow (thrombocytopenia) and peripheral nerve. Because of its potent inhibitory effect on Nf-κB mediated production of pro-inflammatory cytokines, which is likely to play a central role in tubulointerstitial inflammation in MCN, bortezomib appears as the molecule of choice as first-line therapy in MM with renal failure, in association with high-dose dexamethasone. Lenalidomide, which is mainly eliminated through the kidney, should be used with reduced dose adapted to the severity of renal failure. All

these new drugs, commonly used in combination with high-dose dexamethasone, have proven to be efficient in the treatment of myeloma in patients with preserved renal function, by inducing hematologic remission in most cases, usually within the first month. Moreover, a complete hematologic response is achieved in a significant proportion of patients, reaching 30% when these drugs are used in combination with dexamethasone and an alkylating agent (Mateos 2006). The impact on renal function of rapid very good hematologic responses obtained with novel agents has not been investigated in prospective controlled studies.

Given these data, the combination of bortezomib and dexamethasone is currently the standard of care in MM with renal failure, even if it has not been evaluated prospectively, particularly regarding the duration of hematologic responses. It is likely that the duration of hematologic remission could be increased with the adjunction of an alkylating agent, which may further improve renal prognosis without inducing higher frequency of adverse events (San Miguel 2008).

To address these issues, we have designed a prospective multicenter study that will evaluate the benefit of reinforcing the current reference regimen bortezomib-dexamethasone with cyclophosphamide. Cyclophosphamide is the most commonly used alkylating agent in patients with renal failure, and is part of the CTD (Cyclophosphamide-Thalidomide-Dexamethasone) regimen, currently given as first line therapy in MM in the UK (Kyriakou 2005, Sidra 2006). In a retrospective study, the Cyclophosphamide-Bortezomib-Dexamethasone (C-BD) regimen resulted in hematologic response rate of 75% (including complete responses), higher than that obtained with BD and with similar tolerance profile (Davies, 2007). In a prospective phase II study, Reeder et al have confirmed the efficacy of the C-BD regimen, with cyclophosphamide given orally, which produced a hematologic response rate of 88% and complete response or very good partial response rate of 39% (Reeder, 2009). The optimal dose of intravenous cyclophosphamide in association with BD was determined in another recent study (Kropff, 2009).

## **2. STUDY OBJECTIVES**

The aim of the present randomized controlled phase III trial in patients with renal failure contemporary to the diagnosis of myeloma, or complicating the course of previously diagnosed but non-treated myeloma, is to evaluate the effect on renal function of:

- The association of bortezomib plus dexamethasone, reinforced or not with cyclophosphamide in patients not requiring dialysis. Randomization will be stratified according to patient age and to the severity of acute kidney injury, based on AKIN classification.
- An intensive dialysis regimen using either a conventional dialysis membrane, or the new generation protein-leaking HCO dialyzer 2.1 m<sup>2</sup> in surface (Theralite™) in patients requiring hemodialysis. Given the small number of patients potentially enrollable within a reasonable duration of inclusion period, all will receive the same chemotherapy with dexamethasone and bortezomib.

## **3. STUDY DESIGN**

The present study is a prospective randomized multicenter controlled trial with two parallel groups stratified according to the requirement of hemodialysis at the time of inclusion. Before randomization, all eligible patient will enter a screening/inclusion phase that will serve to validate inclusion criteria.

### **A) INCLUSION/SCREENING PERIOD**

The study starts with a screening phase that will include all potentially eligible patients presenting with acute kidney injury and monoclonal gammopathy. This inclusion period is dedicated to secure the diagnosis of MCN, and to verify that significant renal impairment persists after symptomatic measures and correction of precipitating factors. Each patient will be considered potentially eligible when meeting the following criteria:

1. Age  $\geq 18$  years.
2. Detectable serum and/or monoclonal immunoglobulin (Ig) (whatever its isotype) and/or isolated monoclonal LC.
3. Renal failure with serum creatinine  $>170 \mu\text{mol/L}$  and/or eGFR  $<40 \text{ ml/min/1.73 m}^2$  (MDRD).
4. Having received no more than one course of chemotherapy usually given for the treatment of MM or other lymphoid malignancy.
5. Signed informed consent
6. Affiliation to the national Social Security system.

**During the inclusion period, the following procedures are performed:**

- Correction of precipitating factors, such as dehydration through saline and alkaline fluid administration, withdrawal of nephrotoxic drugs, treatment of hypercalcemia, treatment of infections with antibiotics (if applicable). Alkaline therapy should aim at achieving a urine pH  $>6.5$ . The use of bisphosphonate therapy is permitted. Loop diuretics (furosemide, bumetamide) should be avoided, and, if necessary, used only after appropriate rehydration.
- IV methylprednisolone pulses (Solumedrol®) 400 mg/day, or oral Dexamethasone 40 mg/day for 4 days.
- bone marrow aspiration (or biopsy if required), including molecular studies (FISH and/or PCR) according to local practice, and all explorations required for the diagnosis of MM.
- in case of clinical suspicion of amyloidosis, a minor salivary gland biopsy, or other pertinent biopsy (abdominal fat) will be performed.
- A kidney biopsy will be required in patients with urine albumin excretion above 500 mg/day, or urine albumin over creatinine ratio  $>300 \text{ mg/g}$ , or if albuminuria represents  $\geq 30\%$  of proteinuria on urine protein electrophoresis. A kidney biopsy will be required in all patients presenting with anuria or requiring dialysis. In the other situations, the indication of a kidney biopsy should be evaluated in each patient, according to the local investigator's judgement. It is highly recommended in patients with newly diagnosed MM revealed by AKI without any obvious precipitating factor, and in patients with IgM monoclonal gammopathy.

**B) RANDOMIZATION**

Randomization will be performed between day 4 and day 16 post-inclusion. However, patients with MM and renal failure who already received symptomatic measures (rehydration, correction of precipitating factors) and corticosteroid therapy equivalent to dexamethasone 40 mg or methylprednisolone (Solumedrol®) 400 mg for 4 days, can be randomized immediately.

**Randomization criteria are:**

1. Persistent renal failure (serum creatinine  $>170 \mu\text{mol/L}$  or eGFR  $<40 \text{ ml/min/1.73m}^2$ ).
2. Secondary to MCN, probable (albuminuria  $<30\%$  of total proteinuria, with albuminuria  $<500 \text{ mg/day}$ , and urine albumin over creatinine ratio  $<300 \text{ mg/g}$ , or proven by a kidney biopsy (whenever required by the clinical context or analysis of proteinuria). The association of AL amyloidosis with MCN is a criterion of exclusion. However, the association of MCN with amorphous linear peritubular monoclonal light chain deposits is not a criterion of exclusion, providing that there is no evidence of glomerular lesions (nodular glomerulosclerosis) related to light chain deposition disease.
3. Confirmed diagnosis of multiple myeloma. The diagnosis of MM implicates the presence of significant bone marrow plasma cell infiltration. MM should secrete a measurable monoclonal Ig, i.e. with detectable serum monoclonal Ig by conventional electrophoresis, and/or Bence-Jones proteinuria  $>0.5\text{g/j}$ , and/or serum free LC level  $>2 \times \text{ULN}$ , with abnormal kappa/lambda ratio.

4. Signed informed consent form for participating to the either the chemotherapy part of the study, or the hemodialysis part, as appropriate.
5. Absolute neutrophil count  $\geq 1.0 \times 10^9/L$  **and** platelet count  $\geq 70 \times 10^9/L$ .

**Patients with any of the following exclusion criteria will not be randomized:**

1. Biopsy-proven AL amyloidosis.
2. Any uncontrolled medical condition, co-morbidity, psychiatric disorder or biological abnormality that might interfere with subject's participation or ability to sign an informed consent form.
3. Severe pre-existing chronic renal failure (eGFR  $< 30$  ml/min/1.73 m<sup>2</sup>) (see appendix 1) not related to MM.
4. Severe associated disease, either malignant (other than MM) or non-malignant (except for localized skin basocellular or squamous cell carcinoma).
5. Positive HIV test, or active hepatitis B or C virus infection, or HSV/VZV viral infection.
6. Patient who previously received more than one course of chemotherapy for the treatment of myeloma and/or corticoid therapy equivalent to more than 160 mg of dexamethasone, or more than 1 mg/kg/day of prednisone for a month (excluding methylprednisolone pulses during the inclusion phase).
7. Hepatic insufficiency, AST (SGOT) and ALT (SGPT)  $> 10 \times$  ULN and/or persistent cholestasis (alkaline phosphatases or gammaGT  $> 5 \times$  ULN).
8. Subjects with pre-existing severe peripheral neuropathy.
9. Any contraindication to high-dose steroids.
10. Any contraindication to bortezomib, particularly related to lung or pericardial disorders.
11. Inability to comply with study procedures.
12. In women of child bearing potential, a positive pregnancy test or breast feeding.

#### **4. RANDOMIZATION PROCEDURE**

Randomization will be centralized online, through a secured internet connection. Randomization lists will be predefined in each subgroup (patients requiring or not hemodialysis) and equilibrated according to permutation blocks, the size of which will be blinded to investigators.

Two different situations will be distinguished:

1. Patients not requiring hemodialysis at the time of randomization will be randomized to receive two different chemotherapy regimens: **Bortezomib-Dexamethasone (BD)**, or **Cyclophosphamide-Bortezomib-Dexamethasone (C-BD)**.

Randomization will be equilibrated according to age (over or less than 65 years) and to stage of acute kidney injury as defined by the AKIN criteria (cf appendix 2). When baseline serum creatinine level is not known, it will be calculated using the simplified MDRD equation, assuming a baseline GFR value of 75 ml/min/1.75 m<sup>2</sup>, according to the ADQI Workgroup recommendations (Bellono 2004).

2. Patients requiring hemodialysis at the time of randomization will be assigned to an intensive hemodialysis protocol using either the new generation protein-leaking dialyzer Gambro Theralite™, or a conventional high-flux membrane. Given the small number of patients potentially randomized in this part of the study, all will receive the same chemotherapy regimen with **Bortezomib-Dexamethasone**.

Randomization will be equilibrated according to age (over or less than 65 years) and, if applicable, on prior randomization of chemotherapy (i.e. patients enrolled in the first part of the study who will require hemodialysis before the second course of chemotherapy will be randomized on a separate list, in order to equilibrate their repartition in the 2 arms of the hemodialysis part of the study).

## 5. PART 1: TREATMENT OF PATIENTS NOT REQUIRING HEMODIALYSIS

Patients who do not require hemodialysis at the time of randomization will be randomly assigned to receive either the Bortezomib-Dexamethasone regimen (BD group), or the Cyclophosphamide-Bortezomib-Dexamethasone regimen (C-BD group). Modalities of treatment administration are as defined in the Summary of Product Characteristics (SmPC) (cf appendix 12).

### **A) MODALITIES OF TREATMENT WITH BORTEZOMIB-DEXAMETHASONE (BD GROUP)**

Treatment is started on the day of randomization (day 1). The BD regimen consists of:

- Bortezomib 1.3 mg/m<sup>2</sup> I.V. twice weekly for 2 weeks (on days 1, 4, 8, and 11), followed by a 10 day-period without treatment (days 12-21). This period of 21 days is considered as a cycle of treatment. An interval of at least 72 hours is required between two consecutive injections of bortezomib.
- Dexamethasone 20 mg on days 1, 2, 4, 5, 8, 9, 11 and 12, i.e. on the day of each injection of bortezomib, and on the day after. In case of gastrointestinal symptoms (vomiting), steroid therapy should be administered transiently through I.V. route (using for example 200 mg of Solumedrol® instead of 20 mg of dexamethasone).

The regimen is given for 3 cycles in the absence of serious side-effect. Appropriate supportive measures should be performed, at the local investigator's discretion. It is recommended to consider prevention of gastrointestinal side-effects with proton pump-inhibitors, and prophylactic antibiotherapy with sulfamethoxazole-trimethoprim (Bactrim forte®).

The use of nephrotoxic agents (aminoglycosides, non-steroidal anti-inflammatory agents, diuretics) and contrast media should be avoided.

#### Adaptation of therapy:

The dose of bortezomib is unchanged in patients with impaired renal function. The occurrence of steroid-related side effects may lead to an adaptation of the dexamethasone dose, at the local investigator's discretion.

Absolute neutrophil count must be  $\geq 1.0 \times 10^9$ , and platelet count must be  $\geq 70 \times 10^9$  before starting each BD cycle. If not, introduction of BD should be postponed by 8 days. After this interval, if cytopenias are still present, bortezomib is reintroduced using a 25% lower dose (i.e. 1.3 mg/m<sup>2</sup> reduced to 1 mg/m<sup>2</sup>; 1 mg/m<sup>2</sup> reduced to 0.7 mg/m<sup>2</sup>).

Full blood count should be monitored weekly throughout the duration of chemotherapy.

Once a cycle has been started, bortezomib should be interrupted if any of the following occurs:

- non-hematologic grade 3 toxicity (cf appendix 13).
- grade 4 hematologic toxicity (platelets  $< 30 \times 10^9/l$ , or neutrophils  $< 0.5 \times 10^9/l$ ).

In this situation, Bortezomib should be stopped until the next cycle. At that time:

- if symptoms of toxicity have disappeared, bortezomib is reintroduced using a 25% lower dose (i.e. 1.3 mg/m<sup>2</sup> reduced to 1 mg/m<sup>2</sup>; 1 mg/m<sup>2</sup> reduced to 0.7 mg/m<sup>2</sup>).
- In case of persistent symptoms or relapsing symptoms with the lower dose, withdrawal of bortezomib should be considered.

In bortezomib-treated patients who develop neuropathic pain or peripheral neuropathy, the following measures should be applied (table 1):

| Table 1: Instructions for bortezomib dose modifications in case of neuropathic pain and/or peripheral neuropathy |                                                                                                                    |
|------------------------------------------------------------------------------------------------------------------|--------------------------------------------------------------------------------------------------------------------|
| Severity                                                                                                         | Dose modification                                                                                                  |
| Grade 1 (paresthesias, muscle weakness and/or reduced deep tendon reflexes) without pain or incapacity           | None                                                                                                               |
| Grade 1 with pain, or grade 2 (not interfering with usual daily activities)                                      | Reduce to 1 mg/m <sup>2</sup>                                                                                      |
| Grade 2 with pain, or grade 3 (interfering with usual daily activities)                                          | Stop bortezomib until disappearance of symptoms. Resume bortezomib at a dose of 0.7 mg/m <sup>2</sup> once a week. |
| Grade 4 (permanent sensitive loss with incapacity)                                                               | Stop bortezomib                                                                                                    |

*On the basis of bortezomib dose adaptation in phase II and phase III studies in multiple myeloma*

At the end of each cycle, patient survival, tolerance to treatment, renal response (i.e. serum creatinine  $\leq 170 \mu\text{mol/L}$  and/or estimated glomerular filtration rate (GFR) calculated using the modified MDRD equation  $\geq 40 \text{ ml/min/1.73m}^2$ ), and hematologic response (cf appendix 3) will be evaluated.

- In case of worsening renal failure requiring hemodialysis:
  - o If hemodialysis is required before the second cycle of chemotherapy, the patient will be considered for randomization in the dialysis part of the study, with either the Theralite™ dialyzer, or a conventional high-flux dialyzer. The patient will be considered as non-responder in the comparison of BD versus C-BD. In case of patient refusal, hemodialysis sessions will be performed using a conventional dialyzer, at the local investigator's discretion and according to local practice. If not, the patient will be randomized in the hemodialysis part of the study. The patient will receive appropriate information using the specific information notice. Signed informed consent must be obtained before randomization in the hemodialysis part of the study.
  - o If hemodialysis is required after the second cycle of chemotherapy, the patient will not be randomized for the dialysis membrane. Chemotherapy regimen will not be modified. Hemodialysis sessions will be performed using a conventional dialyzer, with dialysis modalities at local investigator's discretion and according to local practice.
- In case of side-effect leading to permanent bortezomib interruption, the patient will be withdrawn from the study and treatment of myeloma will be at the local investigator's discretion.

After the third cycle of BD:

1. In patients aged less than 65 years, eligible for intensive treatment, who have achieved both hematologic response ( $\geq \text{PR}$ , cf appendix 3) **and** renal response (serum creatinine  $\leq 170 \mu\text{mol/L}$  and/or eGFR  $\geq 40 \text{ ml/min/1.73m}^2$ ): **collection of peripheral blood stem cells (after G-CSF only), followed by high-dose melphalan (200 mg/m<sup>2</sup>) and blood stem cell transplantation** is recommended, in the absence of contraindication.

2. In patients who have achieved hematologic response ( $\geq \text{PR}$ , cf appendix 3), but who are not eligible for intensive treatment (age  $>65$  years), or did not achieve a renal response, or who

show renal progression (even requiring hemodialysis): **administration of three more courses of Bortezomib-Dexamethasone** is recommended.

3. In patients who do not achieve a hematologic response (<PR, cf appendix 3), whatever the renal response, it is strongly recommended to reinforce chemotherapy with **the adjunction of cyclophosphamide, i.e. introduction of a C-BD regimen**, for 3 cycles (cf infra).

After the sixth cycle of BD:

1. In patients aged less than 65 years, eligible for intensive treatment, who have achieved both hematologic response ( $\geq$ PR, cf appendix 3) **and** renal response (serum creatinine  $\leq$ 170  $\mu$ mol/l and/or eGFR  $\geq$ 40 ml/min/1.73m<sup>2</sup>): **collection of peripheral blood stem cells (after G-CSF only), followed by high dose melphalan (200 mg/m<sup>2</sup>) and blood stem cell transplantation** is recommended.

2. In all other situations, treatment of myeloma will be at the local investigator's discretion.

**B) MODALITIES OF TREATMENT WITH CYCLOPHOSPHAMIDE-BORTEZOMIB-DEXAMETHASONE (C-BD GROUP)**

Treatment is started on the day of randomization (day 1). The C-BD regimen consists of:

- Bortezomib 1.3 mg/m<sup>2</sup> I.V. twice weekly for 2 weeks (on days 1, 4, 8, and 11), followed by a 10 day-period without treatment (days 12-21). This period of 21 days is considered as a cycle of treatment. An interval of at least 72 hours is required between two consecutive injections of bortezomib.
- Dexamethasone 20 mg on days 1, 2, 4, 5, 8, 9, 11 and 12, i.e. on the day of each injection of bortezomib, and on the day after. In case of gastrointestinal symptoms (vomiting), steroid therapy should be administered transiently through I.V. route (using for example 200 mg of Solumedrol® instead of 20 mg of dexamethasone).
- Cyclophosphamide 750 mg/m<sup>2</sup> on day 1, through a short I.V. infusion (30 min to 2 hours).

Treatment is delivered over this period of 21 days, which is considered as 1 cycle of treatment. The regimen is given for 3 cycles in the absence of serious side-effect. Appropriate supportive measures, including those required by the use of steroids, should be performed at the local investigator's discretion. It is recommended to consider prevention of nausea, of gastrointestinal side-effects with proton pump-inhibitors, and prophylactic antibiotherapy with sulfamethoxazole-trimethoprim (Bactrim forte®). With the recommended dose of cyclophosphamide, it is not necessary to give systematic bladder protection.

The use of nephrotoxic agents (aminoglycosides, non-steroidal anti-inflammatory agents, diuretics) and contrast media should be avoided.

Adaptation of therapy:

Doses of cyclophosphamide and of bortezomib are unchanged in patients with impaired renal function. In patients who might require hemodialysis, cyclophosphamide and bortezomib should be administered I.V at the end of a dialysis session. The occurrence of steroid-related side effects may lead to an adaptation of the dexamethasone dose, at the local investigator's discretion.

Full blood count should be monitored weekly throughout the duration of chemotherapy.

Absolute neutrophil count must be  $\geq 1.0 \times 10^9$ , and platelet count must be  $\geq 70 \times 10^9$  before starting each C-BD cycle. If not, introduction of C-BD should be postponed by 8 days. After this

interval, if cytopenias are still present, bortezomib **AND** cyclophosphamide should be re-introduced at lower doses:

- Bortezomib: dose reduced from 1.3 mg/m<sup>2</sup> to 1.0 mg/m<sup>2</sup>; or from 1.0 mg/m<sup>2</sup> to 0.7 mg/m<sup>2</sup>.
- Cyclophosphamide: dose reduced from 750 mg/m<sup>2</sup> to 600 mg/m<sup>2</sup>; or from 600 mg/m<sup>2</sup> to 300 mg/m<sup>2</sup>.

Once a cycle has been started, bortezomib should be stopped until the next cycle, in case of:

- non-hematologic grade 3 toxicity (cf appendix 13).
- grade 4 hematologic toxicity (platelets <30 x 10<sup>9</sup>/l, or neutrophils <0.5 x 10<sup>9</sup>/l).

In this situation, bortezomib should be stopped until the next cycle. At that time:

1. If symptoms of toxicity have disappeared, bortezomib **and** cyclophosphamide should be re-introduced, at lower doses:

- Bortezomib: should be reduced from 1.3 mg/m<sup>2</sup> to 1.0 mg/m<sup>2</sup>; or from 1.0 mg/m<sup>2</sup> to 0.7 mg/m<sup>2</sup>.
- Cyclophosphamide: should be reduced from 900 mg/m<sup>2</sup> to 600 mg/m<sup>2</sup>; from 600 mg/m<sup>2</sup> to 300 mg/m<sup>2</sup>.

2. In case of persistent toxicity or if toxicity reoccurs despite lower doses of cyclophosphamide and bortezomib, cyclophosphamide should be stopped.

In Bortezomib-treated patients who develop neuropathic pain or peripheral neuropathy, appropriate measures should be applied, as described above (table 1).

At the end of each cycle, patient survival, tolerance to treatment, renal response (i.e. serum creatinine ≤170 μmol/L and/or estimated glomerular filtration rate (GFR) calculated using the modified MDRD equation ≥40 ml/min/1.73m<sup>2</sup>), and hematologic response (cf appendix 3) will be evaluated.

- In case of worsening renal failure requiring hemodialysis:
  - If hemodialysis is required before the second cycle of chemotherapy, the patient will be considered for randomization in the dialysis part of the study and assigned to receive either the Theralite™ dialyzer, or a conventional high-flux dialyzer. Treatment with C-BD will be stopped, and the patient will be switched to the BD regimen, according to the modalities described above. The patient will be considered as non-responder in the comparison of BD versus C-BD. In case of patient refusal, C-BD regimen will be maintained, and hemodialysis sessions will be performed using a conventional dialyzer, with dialysis modalities at the local investigator's discretion and according to local practice.
  - If hemodialysis is required after the second cycle of chemotherapy, the patient will not be randomized for the dialysis membrane. Chemotherapy regimen (C-BD) will not be modified. Hemodialysis sessions will be performed using a conventional dialyzer, with dialysis modalities performed at local investigator's discretion, according to local practice.
- In case of side-effect leading to permanent interruption of cyclophosphamide **and** bortezomib, the patient will be withdrawn from the study and treatment of myeloma will be at the local investigator's discretion.



After the third cycle of C-BD:

1. In patients aged less than 65 years, eligible for intensive treatment, who have achieved both hematologic response ( $\geq$  PR, cf appendix 3) **and** renal response (serum creatinine  $\leq$ 170  $\mu$ mol/l and/or eGFR  $\geq$ 40 ml/min/1.73m<sup>2</sup>): **collection of peripheral blood stem cells (after G-CSF only), followed by high-dose melphalan (200 mg/m<sup>2</sup>) and blood stem cell transplantation** is recommended, in the absence of contraindication.
2. In patients who have achieved hematologic response ( $\geq$ PR, cf appendix 3), but who are not eligible for intensive treatment (age >65 years), or who did not achieve a renal response, or who show renal progression (even requiring hemodialysis): **administration of three more courses of Cyclophosphamide-Bortezomib-Dexamethasone** is recommended.
3. In patients who do not achieve a hematologic response (< PR, cf appendix 3), whatever the renal response, it is strongly recommended to reinforce chemotherapy with the **adjunction of thalidomide**, i.e. introduction of a C-VTD regimen (Cyclophosphamide-Bortezomib-Thalidomide-Dexamethasone), for 3 cycles (cf appendix 4). In case of any contra-indication to thalidomide, the choice of chemotherapy will be at the local investigator's discretion.

After the sixth cycle of C-BD:

1. In patients aged less than 65 years, eligible for intensive treatment, who have achieved both hematologic response ( $\geq$ PR, cf appendix 3) **and** renal response (serum creatinine  $\leq$ 170  $\mu$ mol/l and/or eGFR  $\geq$ 40 ml/min/1.73m<sup>2</sup>): **collection of peripheral blood stem cells (after G-CSF only), followed by high dose melphalan (200 mg/m<sup>2</sup>) and blood stem cell transplantation** is recommended.
2. In all other situations, treatment of myeloma will be at the local investigator's discretion.

## 6. PART 2: TREATMENT OF PATIENTS REQUIRING HEMODIALYSIS

For patients requiring hemodialysis, 2 situations should be distinguished:

1. Patients requiring hemodialysis after the end of screening period will be randomly assigned to receive hemodialysis either with the Theralite™ dialyzer, or with a conventional high-flux dialyzer. Randomization will occur before the first hemodialysis session, or before the second dialysis session in patients needing emergency dialysis. All patients will receive the same chemotherapy regimen with Bortezomib-Dexamethasone (BD).

2. Patients not requiring hemodialysis at the end of the screening period, who have been initially randomized to receive either the BD or C-BD (see above) may secondarily require dialysis support. Only patients who received no more than 1 cycle of protocol chemotherapy (BD or C-BD) will be eligible for randomization in the use of the dialysis membrane. In patients from the C-BD group, cyclophosphamide will be interrupted and the Bortezomib-Dexamethasone regimen will be used at the second cycle of chemotherapy.

Indications of hemodialysis:

The decision of starting hemodialysis will be at the local investigator's discretion. The following criteria for initiation of hemodialysis are recommended:

- Severe hyperkalemia (>6 mmol/l) or rapid increase in serum potassium level.
- Severe metabolic acidosis (arterial pH <7.1).
- Poor clinical tolerance of renal failure (encephalopathy, severe fluid retention).

- Anuria  $\geq 24$  hours.

#### **A). MODALITIES OF HEMODIALYSIS SESSIONS**

The choice and site of insertion of the hemodialysis catheter will be at the local investigator's discretion, in accordance with local protocols.

According to their randomization arm, patients will be dialyzed using either:

- the Gambro Theralite™ dialyzer of 2.1 m<sup>2</sup> in surface (HCO group).
- a conventional high-flux dialyzer (control group) with an ultrafiltration coefficient  $>14$  ml/min (Eknoyan 2002) and  $\geq 1.8$  m<sup>2</sup> in surface. The use of one of the following membrane types, polyacrylonitrile, polysulfone, or PMMA, is recommended.

##### **HCO group:**

a) As long as patients do not have criteria for dialysis withdrawal, 8 hemodialysis sessions will be performed over the first 10 days following randomization. The duration of each hemodialysis session will be of 5 hours. Dialysis sessions will be performed using a single Theralite™ dialyzer, with blood flow  $\geq 250$  ml/min and dialysate flow  $\geq 300$  ml/min. Fluid removal will be determined by the supervising investigator, aiming not to induce hypovolemia. Anticoagulation will be performed using heparin according to local practice (with similar dose as for hemodialysis with a conventional dialyzer, according to manufacturer's recommendation). Serum albumin levels will be measured at the beginning of each dialysis session. If serum albumin level is  $<25$  g/l, a perfusion of 20g of albumin (100 ml of albumin 20g/100ml) will be performed at the end of the dialysis session.

b) From the 11<sup>th</sup> day, if dialysis is still indicated, 3 weekly hemodialysis sessions will be performed with the same modalities as described above. In patients who do not achieve a renal response, Theralite™ dialyzers will be provided for a maximum duration of 3 months. If the patient further requires hemodialysis after this period, the choice of dialyzer will be at the local investigator's discretion. It is recommended to use the same hemodialysis modalities as for the control group.

##### **Control group:**

Hemodialysis sessions will be performed according to local habits, using high-flux biocompatible dialyzers, as specified above. The duration of each session is 5 hours. As long as patients do not have criteria for dialysis withdrawal, 8 hemodialysis sessions will be performed over the first 10 days following randomization. From the 11<sup>th</sup> day, if dialysis is still indicated, 3 weekly hemodialysis sessions will be performed. Fluid removal will be determined by the supervising investigator, aiming not to induce hypovolemia. Anticoagulation will be prescribed according to local practice. Serum albumin levels will be measured at the beginning of each dialysis session. If serum albumin level is  $<25$  g/l, a perfusion of 20g of albumin (100 ml of albumin 20g/100ml) will be performed at the end of the dialysis session.

#### **B). MODALITIES OF HEMODIALYSIS MONITORING**

The usual clinical surveillance will be applied, according to local practice. The following biological parameters will be measured:

- Before each dialysis session: serum Na, K, Cl, HCO<sub>3</sub>, calcium, phosphate, total protein, serum albumin, full blood count.
- After each dialysis session: same parameters, except for full blood count.
- Before and after the first 3 dialysis sessions, then twice weekly: serum free light chains.

The monitoring of parameters for dialysis efficiency, such as percentage of urea reduction, ionic dialysance, and KT/V is recommended, as appropriate.

### **C). MODALITIES OF CHEMOTHERAPY IN HEMODIALYSIS PATIENTS**

All patients will receive the same Bortezomib-Dexamethasone regimen, as described page 13, section 5, paragraph a) « Modalities of treatment with Bortezomib-Dexamethasone (BD group) ». Bortezomib injections will be systematically performed at the end of the dialysis sessions on hemodialysis days. Three cycles of BD will be administered, followed by evaluation of renal and hematologic responses after the third cycle. Modalities of treatment adaptation will be similar as described above.

Treatment is started on the day of randomization (day 1). The BD regimen consists of:

- Bortezomib 1.3 mg/m<sup>2</sup> I.V. twice weekly for 2 weeks (on days 1, 4, 8, and 11), followed by a 10 day-period without treatment (days 12-21). This period of 21 days is considered as a cycle of treatment. An interval of at least 72 hours is required between two consecutive injections of bortezomib.
- Dexamethasone 20 mg on days 1, 2, 4, 5, 8, 9, 11 and 12, i.e. on the day of each injection of Bortezomib, and on the day after. In case of gastrointestinal symptoms (vomiting), steroid therapy should be administered transiently through I.V. route (using for example 200 mg of Solumedrol<sup>®</sup> instead of 20 mg of dexamethasone).

The regimen is given for 3 cycles in the absence of serious side-effect. Appropriate supportive measures should be performed, at the local investigator's discretion. It is recommended to consider prevention of gastrointestinal side-effects with proton pump-inhibitors, and prophylactic antibiotherapy with sulfamethoxazole-trimethoprim (Bactrim forte<sup>®</sup>).

The use of nephrotoxic agents (aminoglycosides, non-steroidal anti-inflammatory agents, diuretics) and contrast media should be avoided.

#### Adaptation of therapy:

The dose of bortezomib is unchanged in patients on hemodialysis. The occurrence of steroid-related side effects may lead to an adaptation of the dexamethasone dose, at the local investigator's discretion.

Absolute neutrophil count must be  $\geq 1.0 \times 10^9$ , and platelet count must be  $\geq 70 \times 10^9$  before starting each BD cycle. If not, introduction of BD should be postponed by 8 days. After this interval, if cytopenias are still present, bortezomib is reintroduced using a 25% lower dose (i.e. 1.3 mg/m<sup>2</sup> reduced to 1 mg/m<sup>2</sup>; 1 mg/m<sup>2</sup> reduced to 0.7 mg/m<sup>2</sup>).

Full blood count should be monitored weekly throughout the duration of chemotherapy.

Once a cycle has been started, bortezomib should be interrupted if any of the following occurs:

- non-hematologic grade 3 toxicity (cf appendix 13).
- grade 4 hematologic toxicity (platelets  $< 30 \times 10^9/l$ , or neutrophils  $< 0.5 \times 10^9/l$ ).

In this situation, bortezomib should be stopped until the next cycle. At that time:

- if symptoms of toxicity have disappeared, bortezomib is reintroduced using a 25% lower dose (i.e. 1.3 mg/m<sup>2</sup> reduced to 1 mg/m<sup>2</sup>; 1 mg/m<sup>2</sup> reduced to 0.7 mg/m<sup>2</sup>).
- In case of persistent symptoms or relapsing symptoms with the lower dose, withdrawal of bortezomib should be considered.

In bortezomib-treated patients who develop neuropathic pain or peripheral neuropathy, adapted measures should be applied (table 1, page 14).

At the end of each cycle, patient survival, tolerance to treatment, renal response (i.e. serum creatinine  $\leq 170 \mu\text{mol/L}$  and/or estimated glomerular filtration rate (GFR) calculated using the modified MDRD equation  $\geq 40 \text{ ml/min/1.73m}^2$ ), and hematologic response (cf appendix 3) will be evaluated. In case of side-effect leading to permanent bortezomib interruption, the patient will be withdrawn from the study and treatment of myeloma will be at the local investigator's discretion.

After the third cycle of BD:

1. In patients aged less than 65 years, eligible for intensive treatment, who have achieved both hematologic response ( $\geq \text{PR}$ , cf appendix 3) **and** renal response (serum creatinine  $\leq 170 \mu\text{mol/l}$  and/or  $\text{eGFR} \geq 40 \text{ ml/min/1.73m}^2$ ): **collection of peripheral blood stem cells (after G-CSF only), followed by high-dose melphalan (200 mg/m<sup>2</sup>) and blood stem cell transplantation** is recommended, in the absence of contraindication.
2. In patients who have achieved hematologic response ( $\geq \text{PR}$ , cf appendix 3), but who are not eligible for intensive treatment (age  $>65$  years), or did not achieve a renal response: **administration of three more courses of Bortezomib-Dexamethasone** is recommended.
3. In patients who do not achieve a hematologic response ( $< \text{PR}$ , cf appendix 4), whatever the renal response, it is strongly recommended to reinforce chemotherapy with the **introduction of a C-BD regimen (reinforcement of BD by the adjunction of cyclophosphamide)**, for 3 cycles. Modalities of the C-BD regimen in hemodialysis patients are similar to those detailed page 15.

After the sixth cycle of BD:

1. In patients aged less than 65 years, eligible for intensive treatment, who have achieved both hematologic response ( $\geq \text{PR}$ , cf appendix 3) **and** renal response (serum creatinine  $\leq 170 \mu\text{mol/l}$  and/or  $\text{eGFR} \geq 40 \text{ ml/min/1.73m}^2$ ): **collection of peripheral blood stem cells (after G-CSF only), followed by high dose melphalan (200 mg/m<sup>2</sup>) and blood stem cell transplantation** is recommended.
2. In all other situations, treatment of myeloma will be at the local investigator's discretion.

## **7. INITIAL EVALUATION, COMPLEMENTARY INVESTIGATIONS**

### **A) INITIAL EVALUATION**

Before the introduction of chemotherapy (i.e. between day 1 and day 3 post-randomization), complete clinical and biological evaluation of multiple myeloma will be performed, and renal function will be assessed with calculation of eGFR using the simplified MDRD equation (cf appendix 1).

Multiple myeloma stage will be defined, according to Durie and Salmon and to ISS systems (cf appendix 5).

Complete physical examination will be performed with collection of vital parameters, body weight, blood pressure, heart rate, 24-hour urine excretion, ECOG performans status (cf appendix 6). Significant results of baseline physical examination will be recorded.

Biological tests at baseline will include the following:

Blood:

- Full blood count.
- Coagulation profile (prothrombin time and activated cephalin time).
- Serologic tests for HIV, hepatitis B, hepatitis C, HSV and VZV infections.
- Serum creatinine and urea.

- Serum electrolytes (Na, K, Cl, HCO<sub>3</sub>).
- Total calcium, phosphate, ionized calcium.
- Serum albumin.
- Serum protein electrophoresis.
- Serum FLC.
- Beta-2 microglobulin, LDH.
- C-reactive protein.
- Serum immunoelectrophoresis or immunofixation. Serum should be stored for the entire duration of the study.
- Hepatic tests.
- Beta HCG, in women of child bearing potential.

Urine chemistry (on 24-hour urines, if applicable):

- Urine electrolytes (Na, K, Cl), urea, creatinine.
- 24-hour proteinuria.
- Urine protein electrophoresis and immunoelectrophoresis or immunofixation.
- Urine dipstick analysis with measurement of pH.

Other:

- Bone marrow aspiration/or biopsy (if not performed before), including cytogenetics and molecular studies of malignant plasma cells, according to local practice.
- Skeleton X-ray survey if required (skull, spine, upper and lower limbs, pelvis).
- Chest radiography.

## ***B) FOLLOW-UP EVALUATION***

The following tests will be performed at the beginning of each chemotherapy cycle, after the third and sixth cycles of chemotherapy, and at 6 and 12 months post-randomization:

- Full blood count.
- Coagulation profile (prothrombin time and activated cephalin time).
- Serum creatinine and urea.
- Serum electrolytes (Na, K, Cl, HCO<sub>3</sub>).
- Total calcium, phosphate.
- Serum albumin.
- Serum protein electrophoresis.
- Serum FLC.
- C-reactive protein.
- Urine electrolytes (Na, K, Cl), urea, creatinine.
- 24-hour proteinuria.
- Urine dipstick analysis with measurement of pH.
- Urine protein electrophoresis.

Serum beta-2 microglobulin levels, serum and urine protein immunoelectrophoresis or immunofixation will be performed every 3 months.

## 8. JUDGEMENT CRITERIA

### A). PRIMARY OUTCOME

Improvement in renal function after 3 cycles of protocol chemotherapy (at 3 months at the latest), as evaluated by:

- In patients requiring hemodialysis: by the cumulative incidence of hemodialysis independence. Hemodialysis independence is defined by the achievement of eGFR calculated using the modified MDRD equation  $>15 \text{ ml/min/1.73 m}^2$ , 15 days after the last hemodialysis session.
- In patients not requiring hemodialysis, by the achievement of a serum creatinine level  $\leq 170 \text{ } \mu\text{mol/l}$  and/or an estimated glomerular filtration rate (GFR) calculated using the modified MDRD equation  $\geq 40 \text{ ml/min/1.73m}^2$  (i.e., renal function compatible with eligibility for intensive treatment of MM).

### B). SECONDARY OUTCOMES

- Improvement in renal function (same criteria) after 1 cycle of chemotherapy, after completion of protocol chemotherapy, at 6 months and 1 year after randomization.
- Complete renal recovery, defined by return to baseline level of serum creatinine or eGFR (if known), or by eGFR  $\geq 60 \text{ ml/min/1.73m}^2$  after 1 and 3 cycles of chemotherapy, after completion of protocol chemotherapy, at 6 months and 1 year after randomization.
- Renal function, as evaluated by eGFR level after 1 and 3 cycles of chemotherapy, after completion of protocol chemotherapy, at 6 months and 1 year after randomization.
- Hematologic response, after 1 and 3 cycles of chemotherapy, after completion of protocol chemotherapy, at 6 months and 1 year after randomization (cf appendix 3).
- Relapse-free survival, event free survival, time to next myeloma therapy, and overall survival measured from randomization.
- Tolerance to treatment, particularly the occurrence of cytopenias, infectious or haemorrhagic adverse events, and peripheral neuropathy.

## 9. STATISTICS

### A). COMPUTATION OF SAMPLE SIZE

In patients requiring hemodialysis: the primary end-point is the cumulative incidence of hemodialysis independence at 3 months. With the assumption of a 30% cumulative incidence of hemodialysis independence in the control group, it is necessary to recruit two groups of 49 patients to demonstrate a 30% benefit (i.e., a 60% cumulative incidence of hemodialysis independence) in the experimental arm, with a tolerable risk of type I and type II error set at 5% and 20%, respectively.

In patients not requiring dialysis: the primary endpoint is renal response after 3 cycles of chemotherapy. With the assumption of 50% of patients having achieved a renal response at 3 months in the reference group (BD), it is necessary to recruit 2 groups of 93 patients to demonstrate a 20% benefit (i.e., 70% of renal response) in the experimental arm (C-BD), with a tolerable risk of type I and type II error set at 5% and 20%, respectively.

### B) STATISTICAL ANALYSIS

#### Statistical analysis plan.

The two parts (hemodialysis and non hemodialysis patients) of the study will be analyzed separately. Analyses will be performed in a modified intention-to-treat basis, that is, only patients who violated the eligibility criteria or those with consent withdrawal, can be excluded from the analysis. Patients not requiring dialysis will participate to the comparison of the 2 chemotherapy arms. Among these, patients secondarily requiring hemodialysis and included in the hemodialysis part of the study, will be considered as treatment failures for the comparison of the 2 chemotherapy arms, in their randomly

allocated chemotherapy arm. For the calculation of event-free survival, they will be considered as events, and the duration of event-free survival will be defined as the time to the first hemodialysis session. For the calculation of renal survival, they will be censored at the time of the first hemodialysis session. Patients in the hemodialysis part of the study will participate to the comparison of the 2 hemodialysis strategies (HCO or conventional dialyzer) for all end-point criteria, whatever their outcome, from the day of randomization and in their randomly allocated hemodialysis arm.

### **Interim analysis**

For safety and ethical concerns, an interim analysis will be performed 1 year after the date of the first randomization, or after the effective randomization of 40 patients in the chemotherapy part of the study and of 20 patients in the hemodialysis part. Interim analysis will be dedicated to the evaluation of tolerance and mortality, and results will be reported to the Independent Safety Committee (see page 24). Because the aim of interim analysis is not the comparison of primary or secondary endpoints, no adaptation of the type I error rate will be realized.

### **Statistical tests and methods**

Binary outcomes measured will be estimated using punctual estimates with 95% confidence interval. Treatment effect will be measured by odds ratio estimated from logistic model. Comparisons between the randomization groups on the secondary endpoints will be based on appropriate bilateral formulation tests. The continuous criteria will be compared by Mann and Whitney rank tests; qualitative criteria by chi<sup>2</sup> tests or exact Fisher tests; the censored criteria by log-rank tests, unless there is competition (or informative censoring) of the observations, in which case a cumulative incidence will be estimated and comparison based on Gray tests. Failure-time data (overall survival and event-free survival) will be computed from date of randomization, estimated by the Kaplan Meier method, then compared by the log-rank test, with treatment size effect measured by hazard ratios (HR) estimated from Cox models. Proportional hazards assumptions will be checked.

Safety will be evaluated by the incidence rates of reported severe adverse events by patient-years of treatment exposure.

The center effect will be studied.

The threshold of significance will be set at 5% for all the tests of the statistical terminal analysis, which will therefore intervene at the end of the inclusions. All analyses will be based on SAS (SAS Inc, Cary, NC) and R (<http://www.Rproject.org>) packages.

## **10. SAFETY EVALUATION**

### ***A) DESCRIPTION OF PARAMETERS OF SAFETY EVALUATION***

Adverse event: Any untoward medical occurrence in a patient or clinical trial subject administered a medicinal product and which does not necessarily have a causal relationship with this treatment.

Life-threatening adverse event or life-threatening suspected adverse reaction: an adverse event or suspected adverse reaction is considered "life-threatening" if, in the view of either the investigator or Sponsor, its occurrence places the patient or subject at immediate risk of death.

Serious adverse event or serious suspected adverse reaction: any untoward medical occurrence or effect that at any dose results in any of the following outcomes: death, a life-threatening adverse event, inpatient hospitalization or prolongation of existing hospitalization, a persistent or significant incapacity or substantial disruption of the ability to conduct normal life functions, or a congenital

anomaly or birth defect. Important medical events that may not result in death, be life-threatening, or require hospitalization may be considered serious when, based upon appropriate medical judgment, they may jeopardize the patient or subject and may require medical or surgical intervention to prevent one of the outcomes listed in this definition. Examples of such medical events include allergic bronchospasm requiring intensive treatment in an emergency room or at home, blood dyscrasias or convulsions that do not result in inpatient hospitalization, or the development of drug dependency or drug abuse.

Suspected adverse reaction: any adverse event for which there is a reasonable possibility that the drug caused the adverse event. "Reasonable possibility" means there is evidence to suggest a causal relationship between the drug and the adverse event. Suspected adverse reaction implies a lesser degree of certainty about causality than adverse reaction, which means any adverse event caused by a drug.

Unexpected adverse event or unexpected suspected adverse reaction. An adverse event or suspected adverse reaction is considered "unexpected" if it is not listed in the investigator brochure or is not listed at the specificity or severity that has been observed; or, if an investigator brochure is not required or available, is not consistent with the risk information described in the general investigational plan or elsewhere in the current application, as amended. "Unexpected," as used in this definition, also refers to adverse events or suspected adverse reactions that are mentioned in the investigator brochure as occurring with a class of drugs or as anticipated from the pharmacological properties of the drug, but are not specifically mentioned as occurring with the particular drug under investigation.

## ***B). METHODS AND SCHEDULE OF SAFETY PARAMETERS MEASUREMENT, COLLECTION AND ANALYSIS***

### **Steering committee.**

It is composed of the coordinating investigators (Prof Fermand/Prof Bridoux), of investigators (Prof Attal, Prof Combe, Prof Jaccard, Prof Moulin, Prof Moreau, Prof Ronco), of the biostatistician in charge of the project (Prof Sylvie Chevret), and of representatives of the Sponsor and of the Clinical Research Unit (Hôpital Saint Louis, Paris). The committee will define general organization, conduct of research and coordination of information. It will initially determine the methodology, decide appropriate measures in case of unexpected events, and monitor the conduct of research with focus on tolerance and adverse events.

### **Independent monitoring committee.**

It will be composed of experts not involved in research, including a hematologist and a nephrologist specialized in the studied pathology, and a biostatistician. The committee will meet once during the first year of research, then twice a year to decide the continuation or discontinuation of the study, according to the information provided by the study coordinators and the biostatistician.

### **Interim safety analysis.**

An interim safety analysis will be organized by the independent monitoring committee based on information provided by the study biostatistician (Prof Sylvie Chevret). It will be held 1 year after the date of the first randomization, or after randomization of 40 patients in the chemotherapy part of the study (patients not requiring hemodialysis) and 20 patients in the hemodialysis part of the study. The main objective will be the evaluation of the benefit to risk ratio of the study. To this aim, all adverse events and serious adverse events will be analyzed, as well as their accountability and all appropriate measures will be decided to guarantee the securing of subjects participating to the research.

## ***C) PROCEDURES REGARDING REGISTRATION AND REPORTING OF ADVERSE EVENTS***

Adverse events should be recorded according to the above classification (see appendix 13).



All adverse events occurring after the first dose of investigational product observed by the investigator or reported by the subject (whether or not attributed to investigational product), will be reported on the CRF. Any relevant clinical or para-clinical information that may help to describe the corresponding event will be reported. Medically significant adverse events considered related to the investigational product by the investigator or the Sponsor will be followed until resolved or considered stable. The following attributes must be assigned by the investigator: description; dates of onset and resolution; severity; assessment of relatedness to investigational product, and action taken. The investigator may be asked to provide follow-up information.

Serious adverse events (SAE). Any serious adverse event, as defined above, will be immediately notified by the investigators to the Sponsor (APHP). Completed SAE report forms (see appendix 15) will be immediately sent by fax or telecopy at the DRCD, to the project manager Damien Vanhoye (fax: 01 44 84 17 99) (if possible after an immediate phone call at 01 44 84 17 48 in case of death or unexpected vital threat). The Clinical Research Unit in Saint Louis Hospital (DBIM) in charge of research will be regularly informed through transmission of the SAE report forms.

Data regarding SAE will be reported in the eCRF, which corresponding page will be printed and faxed to the DRCD as soon as possible, as requested by the law.

For each serious adverse event, the investigator will have to assess causality between the event and experimental and/or non-experimental treatment.

Information relative to the description and evaluation of an adverse event may be not obtained in the time allocated for the initial declaration. Thus, clinical follow-up data and results of clinical evaluation and complementary diagnostic or laboratory investigations, or of any other information that may allow appropriate analysis of causality will be reported:

- either on the initial adverse event report form if information is readily available,
- or later and as soon as possible, by sending a novel completed SAE form by fax, specifying that it corresponds to the tracking of a declared SAE and the tracking number.

All SAE reports by investigators should identify each participating patient by a single specific code number. In the event of the death of a participating patient, investigator will provide all relevant information to the Sponsor (hospitalization report, autopsy report...).

Any significant development during research or in the context of research, coming from data of the literature, or from other ongoing research, will be notified to the Sponsor.

Any pregnancy that would occur immediately after biomedical research will be immediately declared as a SAE to the Sponsor and specific follow-up will be organized until delivery.

#### **SAE reporting to Regulatory Authorities and Ethics Committee**

AE reporting will be undertaken by the « Pôle Vigilance » of DRCD, after evaluation of the AE severity, of the causality with experimental treatment and non-experimental treatment, and whether AE was expected or not. Unexpected AE will be reported by the Sponsor to competent regulatory authorities within legal declaration time:

- unexpected SAE responsible for death or vital threat: 7 days from the day of report to the Sponsor
- other unexpected SAE: within 15 days from the day of report to the Sponsor.

In the event of an unexpected SAE related to the research treatment or to research itself, all regulatory authorities, ethics committee, and research investigators will be informed.

#### ***D) MODALITIES AND DURATION OF SURVEILLANCE FOLLOWING THE OCCURRENCE OF ADVERSE EVENTS***

Any patient in whom an adverse event has occurred should undergo clinical surveillance until resolution or stabilization of the adverse event. All patients participating to the research will undergo full evaluation at 12 months.

#### ***E) MEASURES TO PREVENT PREGNANCY***

This paragraph does not apply to female subjects or to female partners of male patients aged more than 50 years and with amenorrhea for more than 1 year. It does not apply also to women with early menopause confirmed by a specialized gynecologist and to patients with a past history of gynecologic surgery (bilateral salpingectomy and ovariectomy or hysterectomy) or with congenital disorders (Mullerian agenesis, Turner syndrome).

In the other situations, a pregnancy risk cannot be definitely ruled out, which justifies the following:

- to perform a pregnancy test in case of any doubt in female subjects who will receive bortezomib with or without cyclophosphamide, during initial evaluation and all along the follow-up period.
- female subjects of child bearing potential should agree to use and be able to comply with effective contraception without interruption, throughout the entire duration of study and for 3 months after the end of study.
- in the event of prescription of thalidomide, to comply with current rules regarding the use of thalidomide, which risk of teratogenicity is well established.

- *Before starting treatment:*

- complete information on the teratogenic risk of thalidomide and on the Pregnancy Prevention Program must be provided by the investigator to female subjects of child bearing potential, and, if appropriate, to male subjects.
- female subjects of child bearing potential should have a medically supervised pregnancy test with a minimum sensitivity of 25 mIU/ml on the day of the study visit or in the 3 days prior to the study visit when thalidomide is prescribed once the subject has been on effective contraception for at least 4 weeks. This requirement also applies to women of childbearing potential who practice complete and continued abstinence. The test should ensure the subject is not pregnant when she starts treatment with thalidomide.

- *Under treatment and after the end of study treatment*

Female subjects of child bearing potential should undergo a supervised pregnancy test every 4 weeks until 4 weeks after the end of study treatment, except in the case of confirmed tubal sterilization. These pregnancy tests should be performed on the day of the study visit or in the 3 days prior to the study visit. This requirement also applies to women of childbearing potential who practice complete and continued abstinence.

These recommendations are listed in the information material, which also includes a patient follow-up diary, pregnancy prevention and treatment follow-up measures, the patient package insert and a pregnancy report form delivered by the authorization holder (Celgene France).

#### **11. PROCEDURES OF TEMPORARY OR PERMANENT TREATMENT INTERRUPTION**

Interruption of the experimental treatment will be at the investigator's judgment, if justified by patient's interest. Causes of premature treatment interruption are serious adverse event

(toxicity/tolerance) or inefficacy, leading to the introduction of treatment other than that patient received at the time of inclusion, or if the result of complementary investigations makes it necessary to stop the study. Clinical monitoring will be pursued as planned in the study design and patient data will be recorded. If treatment is stopped because of toxicity, a SAE will be declared and clinical monitoring will be maintained until resolution.

Subjects may withdraw their consent to participate in this study at any time without prejudice. The investigator must withdraw from the study any subject who requests to be withdrawn. A subject's participation in the study may be discontinued at any time at the discretion of the investigator in accordance with his/her clinical judgment. The Sponsor should be notified in a timely manner of all subject discontinuations. If asked by the subject, none of his own data will be used for research.

According to circumstances, the Sponsor (Assistance Publique des Hôpitaux de Paris) and/or regulatory authorities may decide to prematurely end the research, in the event of a modification of expected benefit over risk ratio, or because of novel data regarding the experimental treatment that may compromise patient security, or in case of a major protocol deviation.

## **12. CASE REPORT FORM**

Data regarding research will be collected and monitored using the CleanWEB electronic CRF, according to the public contract concluded between AP-HP and TELEMEDICINE TECHNOLOGIES S.A. on November 17, 2003 (reference N° 033845) and renewed on November 21, 2006 (reference N° 063844). Data will be centralized on a server hosted by the Département des Services Opérationnels (DSO) of AP-HP, 67 boulevard Bessières, 75017 PARIS. Data will be collected in eCRF after each clinical visit by local investigators. Access will be restricted to each investigator by a personal access code and password. Each investigator will be attributed a specific profile that will allow access to part or entire system functionalities (from data entry or visualization to full access to whole study data, or ability to modify and validate data by clinical research assistants, etc...). Data storage will be done on a secure server, providing data encryption during transmission and automatic internal save on the server hosting the eCRF.

## **13. ETHICAL CONSIDERATIONS**

### Role of the study Sponsor

In accordance with the law of the French Public Health (law n°2004-806 of 9 August 2004), Assistance Publique-Hôpitaux de Paris (APHP) will be the Sponsor of the research study. The Regional Delegation for Clinic Research (Délégation Régionale à la Recherche Clinique) will monitor regulatory issues and have a decision-making role, in compliance with article L 1121-1 of the French Code of Public Health. Assistance Publique-Hôpitaux de Paris reserves the right to interrupt research at any time for medical or administrative reasons; in this event, the decision will be notified to the investigator.

### Submission of the protocol to the Ethics Committee

In accordance with article L.1123-6 of the French Code of Public Health, the research protocol will be submitted (along with insurance certificate and receipt) to the Comité Consultatif de Protection des Personnes en Recherche Biomédicale-Ile de France, after approval of the Sponsor. The decision of the committee will be notified in the form addressed by the study Sponsor to competent regulatory authority before the beginning of the study.

### Authorization from the Agence Française de Sécurité Sanitaire des Produits de Santé (Afssaps) - French Agency for Health and Safety of Health Products.

Assistance Publique-Hôpitaux de Paris, as the study Sponsor, must obtain authorization from Afssaps for biomedical research on medicinal product for human use prior to the implementation of research, within its competences and in accordance with regulatory and legal measures in force.

## Declaration to the National Commission for Data Protection and Liberties (CNIL-France)

The legislation provides that the declaration should have been filed before the effective beginning of the research.

### Research documentation

Before starting research, the coordinating investigator and all study investigators will provide a signed up-to-date curriculum-vitæ as well as their registration number to the French National Medical Council (CNOM). The accepted submitted protocol version and its appendixes will be signed by the coordinating investigator, the Sponsor's representative and, if applicable, by the scientific manager. Each novel protocol version, updated after amendments and/or request from regulatory authorities, will be attributed a novel number, with updated date of issue, and same signatures will be obtained. The investigator and the Sponsor will ensure that the study is conducted in full compliance with the "Declaration of Helsinki" ICH guidelines (<http://private.ich.org/LOB/media/MEDIA482.pdf>), with the ICH Good Clinical Practice Guideline, and with the French laws and regulations to afford the greater protection to the subjects participating to the study. To this end, a signed scientific agreement from each investigator in each participating center will be delivered to the study Sponsor.

## **14. DATA PROCESSING AND STORAGE**

### Data transcription

Investigators participating in the study should submit all required information for each enrolled subject using the eCRF. An explanation should be given for missing data. Clinical and para-clinical data should be transferred in the eCRF as soon as they are collected.

Incorrect data identified in the eCRF will be replaced by a declared investigator, who will access the Cleanweb system using personal identification code and password. These codes are strictly confidential and can by no means be communicated to a third party; they contribute to secure data confidentiality and to authenticate interventions. Access codes are associated with an electronic signature system which validates data entered by the investigator. Each signature is time stamped and registered in the research "Audit trail". Signed data cannot be modified, but the investigator can cancel his signature if data need to be modified. Signature annulation is also recorded and time stamped.

Anonymity of participating subjects will be secured by the mention of only the patient number and initials in all documents relative to research and by masking of individual-related data on source documents, by any appropriate mean. Electronic data file will be declared to CLIN-France, according to adapted procedure.

Clinical research assistants, project manager, assistant project manager, clinical trial coordinator of the Clinical Research Unit, and data manager will have habilitation to visualize CRF and to ask queries to investigators.

### Protocol amendments

The Department of Clinical Research and Development (DRCD) should be informed from any modification of the study by the coordinating investigator. Modifications should be qualified as substantial or non-substantial. Any amendment to the research protocol must be notified to the Ethics Committee if it includes substantial modifications, i.e. that may in one way or another modify guarantees to persons participating to the biomedical research (modification of inclusion criteria, prolongation of the inclusion period, participation of additional investigators....).

### Extension of research

Any extension of the research protocol (significant modification of the treatment schedule or of studied populations, prolongation of research treatment or medical actions not initially intended) should be considered as new research.

### Retention of records

In accordance with regulations for Biomedical Research Involving Human Subjects, investigators are required to maintain all study documentation, including documents created or modified in electronic format, for at least 15 years following the completion of the study.

Indexed archiving includes:

- All successive versions of the study protocol (identified by specific number and date of issue).
- By the coordinating investigator: certificates of authorization by regulatory authorities and ethics committee approval for the corresponding research.
- All correspondence with the Sponsor.
- Signed Informed Consent Form (ICF) from each subject participating to the research (under sealed envelope for minor child with signed consent of the person who has parental authority) with the corresponding list or registry of inclusions.
- Completed and validated paper copy of the CRF from each included participating subject, dated and signed by the coordinating investigator or the local investigator.
- Audit trail.
- Data Handling Manual, with accurate description of eCRF (data, monitoring....).
- All ancillary documents specifically relevant to research.
- The final research report after statistical analysis and quality control (with copy sent to the study Sponsor). During the closing visit to each participating center, clinical research assistants will make a CD-ROM copy of the following: pdf files of eCRF from each patient included in the centre, randomization fax, all correspondence related to research, the audit trail and electronic correction queries. This CD-ROM will be archived in the investigator site file.

The database used for statistical analysis should be also archived by the statistician in charge of final analysis (paper support or electronic file).

## **15. ACCESS RIGHTS AND SOURCE DOCUMENTS**

In accordance with applicable laws and regulations, particularly articles L.1121-3 et R.5121-13 of the French Public Health Code, authorized persons (including investigators, persons in charge of quality control, data monitors, clinical research assistants, auditors, and all persons collaborating to the trial) are required to take all measures necessary to guarantee confidentiality of all information regarding experimental treatments, clinical trial, identity of participating subjects, and results of research. All data collected by these persons during quality controls or audits will remain anonymous.

## **16. QUALITY CONTROL AND ASSURANCE**

Quality control and assurance will be performed by a clinical research assistant specifically recruited for this trial. Research will be framed under the Sponsor's Standard Operating Procedure (SOP).

Research and management of patients in each participating center will be conducted in compliance with the principles of the Declaration of Helsinki and with Good Clinical Practice Guidelines. The Sponsor's representatives will organize regularly visits to participating centers, according to the schedule of patient follow-up visits as defined in the study protocol, to the inclusion rate and to the protocol risk assessment.

During subsequent visits, case report files will be reviewed according to the progression of research, by clinical research assistants representing the Sponsor who will control the accuracy of data reporting and validate CRF. Primary investigator and associate investigators in each center, involved in the inclusion and follow-up of participating subjects, must consent to regularly meet the Sponsor's representatives designated by APHP. During these on-site visits and in accordance with Good Clinical Practice Guidelines, the following items will be checked:

- Compliance with the research protocol and related procedures.
- Verification of source documents and confrontation with data reported in the CRF.
- Quality assurance of data reported in the CRF: accuracy, missing data, data consistency, in accordance with the protocol procedures.

#### **17. FUNDING AND INSURANCE**

Funding is provided according to the budget obtained by the Program Hospitalier de Recherche Clinique. Assistance Publique-Hôpitaux de Paris is the Sponsor of the present research in France. The Sponsor Assistance Publique-Hôpitaux de Paris has purchased insurance with the HGIGERLING company through BIOMEDIC-INSURE for the entire duration of the study, which guarantees its own civil liability as well as that of all persons involved in the conduction of research (medical and non-medical contributors) (law N° 2004-806 Art. L 1121-10 of the French Public Health Code). Address: Parc d'Innovation Bretagne Sud C. P. 142 56038 Vannes Cedex, France.

#### **18. FINAL RESEARCH REPORT**

In accordance with the article R1123-60 of the French Public Health Code, the final research report is established and signed by the Sponsor and the Coordinating Investigator. A report written in compliance with the reference plan of the competent regulatory authority should be transmitted to the regulatory authority and to the Ethics Committee within the first year following the end of the research, which corresponds to the end of the participation of the last subject enrolled onto the research protocol.

#### **19. DATA PUBLICATION RULES AND INTELLECTUAL PROPERTY RIGHTS**

Assistance Publique-Hôpitaux de Paris (AP-HP) retains ownership of all data related to the study. None of these data cannot be used or transmitted to a third party without the prior expressed consent of APHP. AP-HP must be identified as the financial sponsor where appropriate. The terms « Assistance Publique-Hôpitaux de Paris » must appear in the authors address. The final publication of the study should be sent for approval to all contributors before submission. According to the rate of patient recruitment in the study, contributors will be included in the author list.

## 20. REFERENCES

1. Badros A, Barlogie B, Siegel E, et al. Results of autologous stem cell transplant in multiple myeloma patients with renal failure. *Br J Haematol* 2001; 114: 822-829.
2. Bachmann U, Schindler R, Storr M, Kahl A, Joerres A, Sturm I. Combination of bortezomib-based chemotherapy and extracorporeal free light chain removal for treating cast nephropathy in multiple myeloma. *Nephrol Dial Transplant* 2008. doi: 10.1093/ndtplus/sfm 053.
3. Batuman V. Proximal tubular injury in myeloma. *Contrib Nephrol* 2007; 153: 87-104.
4. Bellono R, Ronco C, Kellum JA, Mehta RL, Palevsky P and the ADQI workgroup. Acute renal failure – definition, outcome measures, animal models, fluid therapy and information technology needs: the Second International Consensus Conference of the Acute Dialysis Quality Initiative (ADQI) Group. *Crit Care* 2004; 8: R204-R212.
5. Birn H, Christensen EI. Renal albumin absorption in physiology and pathology. *Kidney Int* 2006; 69: 440-449.
6. Bladé J, Fernandez-Llama P, Bosch F, et al. Renal failure in multiple myeloma: presenting features and predictors of outcome in 94 patients from a single institution. *Arch Intern Med* 1998; 158: 1889-1893.
7. Chanan-Khan AA, Kaufman JL, Mehta J, et al. Activity and safety of bortezomib in multiple myeloma patients with advanced renal failure: a multicenter retrospective study. *Blood* 2007; 109: 2604-2610.
8. Clark WF, Stewart AK, Rock GA, et al. Plasma exchange when myeloma presents as acute renal failure. *Ann Intern Med* 2005; 143: 777-784.
9. Cohen DJ, Sherman WH, Osserman EF, Appel GB. Acute renal failure in patients with multiple myeloma. *Am J Med* 1984; 76: 247-256.
10. Davies FE, Wu P, Jenner M, Srikanth M, Saso R, Morgan GJ. The combination of cyclophosphamide, velcade and dexamethasone induces high response rates with comparable toxicity to velcade alone and velcade plus dexamethasone. *Haematologica*. 2007; 92: 1149-1150.
11. Eknoyan G, Beck GJ, Cheung AK, et al. Effect of dialysis dose and membrane flux in maintenance hemodialysis. *N Engl J Med* 2002; 347: 2010-2019.
12. Durie BG, Harousseau JL, Miguel JS, et al. International uniform response criteria for multiple myeloma. *Leukemia* 2006; 20: 1467-1473.
13. Facon T, Mary JY, Hulin C, et al. Melphalan and prednisone plus thalidomide versus melphalan and prednisone alone or reduced-intensity autologous stem cell transplantation in elderly patients with multiple myeloma (IFM 99-06): a randomised trial. *Lancet*. 2007; 370 :1209-1218.
14. Fakhouri F, Guerraoui H, Presne C, et al. Thalidomide in patients with multiple myeloma and renal failure. *Br J Haematol* 2004; 125: 96-97.
15. Haubitz M, Peest D. Myeloma - new approaches to combined nephrological-haematological management. *Nephrol Dial Transplant* 2006; 21: 582-590.
16. Hutchison CA, Cockwell P, Reid S, et al. Efficient removal of immunoglobulin free light chains by hemodialysis for multiple myeloma: in vitro and in vivo studies. *J Am Soc Nephrol* 2007; 18: 886-895.
17. Hutchison CA, Bradwell AR, Cook M, et al. Treatment of acute renal failure secondary to multiple myeloma with chemotherapy and extended high cut-off hemodialysis. *Clin J Am Soc Nephrol* 2009; 4: 745-754.

18. Jagannath S, Barlogie B, Berenson JR et al. Bortezomib in recurrent and/or refractory multiple myeloma. Initial clinical experience in patients with impaired renal function. *Cancer*. 2005; 103: 1195-1200.
19. Kastritis E, Agnastopoulos A, Roussou M, et al. Reversibility of renal failure in newly diagnosed multiple myeloma patients treated with high dose dexamethasone-containing regimens and the impact of novel agents. *Haematologica* 2007; 92: 546-549.
20. Knudsen LM, Hjorth M, Hippe E. Renal failure in multiple myeloma: reversibility and impact on the prognosis. Nordic Myeloma Study Group. *Eur J Haematol* 2000; 65: 175-181.
21. Knudsen LM, Nielsen B, Gimsing P, Geisler C. Autologous stem cell transplantation in multiple myeloma: outcome in patients with renal failure. *Eur J Haematol*. 2005; 75: 27-33.
22. Kropff M, Liebisch P, Knop S, et al. DSMM XI study: dose definition for intravenous cyclophosphamide in combination with bortezomib/dexamethasone for remission induction in patients with newly diagnosed myeloma. *Ann Hematol*. 2009; 88: 1125-1130.
23. Kyriakou C, Thomson K, D'Sa S, et al. Low-dose thalidomide in combination with oral weekly cyclophosphamide and pulsed dexamethasone is a well tolerated and effective regimen in patients with relapsed and refractory multiple myeloma. *Br J Haematol*. 2005; 129: 763-770.
24. Lee CK, Zangari M, Barlogie B, Fassas A, et al. Dialysis-dependent renal failure in patients with myeloma can be reversed by high-dose myeloablative therapy and autotransplant. *Bone Marrow Transplant*. 2004; 33: 823-828.
25. Leung N, Gertz MA, Zeldenrust SR, et al. Improvement of cast nephropathy with plasma exchange depends on the diagnosis and on reduction of serum free light chains. *Kidney Int* 2008; 73: 1211-1213.
26. Li M, Hering-Smith KS, Simon EE, Batuman V. Myeloma light chains induce epithelial-mesenchymal transition in human renal proximal tubule epithelial cells. *Nephrol Dial Transplant* 2008; 23: 860-870.
27. Ludwig H, Drach J, Graf H, Lang A, Meran JG. Reversal of acute renal failure by bortezomib-based chemotherapy in patients with multiple myeloma. *Haematologica* 2007; 92: 1411-1414.
28. Mateos MV, Hernandez JM, Hernandez MT, et al. Bortezomib plus melphalan and prednisone in elderly untreated patients with multiple myeloma: results of a multicenter phase 1/2 study. *Blood* 2006; 108: 2165-2172.
29. Mehta RL, Kellum JA, Shah SV, et al. Report of an initiative to improve outcomes in acute kidney injury. *Crit Care* 2007; 11: R31.
30. Pirani CL, Silva F, D'Agati V, Chander P, Striker LM. Renal lesions in plasma cell dyscrasias: ultrastructural observations. *Am J Kidney Dis* 1987; 10: 208-221.
31. Rayner HC, Haynes AP, Thompson JR, Russel N, Fletcher J. Perspectives in multiple myeloma: survival, prognostic factors and disease complications in a single centre between 1975 and 1988. *Q J Med* 1991; 79: 517-525.
32. Reeder CB, Reece DE, Kukreti V, et al. Cyclophosphamide, bortezomib and dexamethasone induction for newly diagnosed multiple myeloma: high response rates in a phase II clinical trial. *Leukemia*. 2009; 23: 1337-1341.
33. Ronco PM, Aucouturier P, Mougenot B. Monoclonal gammopathies: multiple myeloma, amyloidosis, and related disorders. In : Schrier, Gottschalk. *Diseases of the Kidney*, 2001: 2205-2253.



34. Rota S, Mougenot B, Baudouin B, et al. Multiple myeloma and severe renal failure: a clinicopathologic study of outcome and prognosis in 34 patients. *Medicine (Baltimore)* 1987; 66: 126-137.
35. Sakhuja V, Jha V, Varma S, et al. Renal involvement in multiple myeloma: a 10-year study. *Ren Fail* 2000; 22: 465-477.
36. San Miguel JF, Richardson PG, Sonneveld P, et al. Efficacy and safety of bortezomib in patients with renal impairment: results from the APEX phase 3 study. *Leukemia* 2008; 22: 842-849.
37. San Miguel JF, Schlag R, Khuageva NK, et al. Bortezomib plus melphalan and prednisone for initial treatment of multiple myeloma. *N Engl J Med* 2008; 359: 906-917.
38. Sanders PW, Booker BB. Pathobiology of cast nephropathy from human Bence Jones proteins. *J Clin Invest* 1992; 89: 630-639.
39. Sidra G, Williams CD, Russell NH, Zaman S, Myers B, Byrne JL. Combination chemotherapy with cyclophosphamide, thalidomide and dexamethasone for patients with refractory, newly diagnosed or relapsed myeloma. *Haematologica* 2006; 91: 862-863.
40. Tosi P, Zamagni E, Cellini C, Cangini D, Tachetti P, Tura S, et al. Thalidomide alone or in combination with dexamethasone in patients with advanced, relapsed or refractory multiple myeloma and renal failure. *Eur J Haematol* 2004; 73: 98-103.

## APPENDIX 1. Evaluation of renal function

### MDRD (Modification of Diet in Renal Disease) – simplified equation:

1. If serum creatinine is measured using the Jaffé colorimetric assay:

Estimated GFR (ml/min/1.73m<sup>2</sup>): **186, 3** x [serum creatinine (mg/dl)]<sup>-1.154</sup> x [age (years)]<sup>-0.203</sup> x 0.742 (if female) x 1.212 (if black).

- 2.: If serum creatinine is measured using an enzymatic assay:

Estimated GFR (ml/min/1.73m<sup>2</sup>): **175** x [serum creatinine (mg/dl)]<sup>-1.154</sup> x [age (years)]<sup>-0.203</sup> x 0.742 (if female) x 1.212 (if black).

### Cockcroft and Gault equation:

Creatinine clearance, ml/min: 
$$\frac{[140 - \text{age (years)}] \times \text{body weight (kgs)} \times K}{\text{Serum creatinine } (\mu\text{mol/l})}$$

K = 1.23 if male, 1.04 if female

**APPENDIX 2. AKIN (Acute Kidney Injury Network) classification/staging system for acute kidney injury**

| Stage    | Serum creatinine criteria                                                                                                                                                                                | Urine output criteria                                      |
|----------|----------------------------------------------------------------------------------------------------------------------------------------------------------------------------------------------------------|------------------------------------------------------------|
| <b>1</b> | Increase in serum creatinine of $\geq$ 0.3 mg/dl (26.4 $\mu$ mol/l) or increase to $\geq$ 150 to 200 % (1.5- to 2-fold) from baseline                                                                    | Less than 0.5 ml/kg/h for more than 6 hours                |
| <b>2</b> | Increase in serum creatinine to more than 200 to 300% (> 2- to 3-fold) from baseline                                                                                                                     | Less than 0.5 ml/kg/h for more than 12 hours               |
| <b>3</b> | Increase in serum creatinine to more than 300% (> 3-fold) from baseline, or serum creatinine of $\geq$ 4.0 mg/dl ( $\geq$ 354 $\mu$ mol/l) with an acute increase of at least 0.5 mg/dl (44 $\mu$ mol/l) | Less than 0.3 ml/kg/h for 24 hours, or anuria for 12 hours |

From Mehta RL, Kellum JA, Shah SV, et al. Report of an initiative to improve outcomes in acute kidney injury. Crit Care 2007; 11: R31.

Only one criterion (serum creatinine or urine output) has to be fulfilled to qualify for a stage.

According to the recommendations of the ADQI workgroup (Bellomo 2004), in patients in whom a baseline serum creatinine is unknown, it is possible to calculate a theoretical baseline serum creatinine value assuming a given normal GFR. By normalizing the GFR to the body surface area, a GFR of approximately 75 to 100 ml/min per 1.73 m<sup>2</sup> can be assumed. Thus, for a given patient, a baseline serum creatinine value can be calculated assuming a value of baseline GFR of 75 ml/min/1.73m<sup>2</sup>, using the simplified “modification of diet in renal disease” (MDRD) formula, which provides a robust estimate of GFR relative to serum creatinine based on age, race and sex.

### **APPENDIX 3. Hematologic response criteria**

**Partial Response (PR)**, all of the following:

- $\geq 50\%$  reduction in involved serum free light chain (LC) level.
- Parallel improvement of serum kappa/lambda ratio.
- Reduction in the level of monoclonal entire Ig, if present
- Reduction in the involved urine LC excretion
- No evidence of any sign of disease progression (i.e. new soft tissue plasmacytoma, new lytic bone lesions, hypercalcemia).

**Very Good Partial Response (VGPR)**, all of the following:

- $\geq 90\%$  reduction in involved serum free light chain (LC) level.
- Parallel improvement of serum kappa/lambda ratio.
- Serum monoclonal Ig (if present) and urine monoclonal LC detectable by immunofixation but not on electrophoresis
- No evidence of any sign of disease progression (i.e. development of lytic bone lesions or soft tissue plasmacytoma, or hypercalcemia).

**Complete Response (CR)**, all of the following:

- No detectable serum and urine monoclonal Ig by immunofixation
- Normal serum kappa/lambda ratio
- $< 5\%$  plasma cells in bone marrow (by aspiration or bone marrow if needed)
- No evidence of any sign of disease progression (i.e. development of lytic bone lesions or soft tissue plasmacytoma, or hypercalcemia).

**Progressive Disease (PD), or relapse**, at least one of the following:

- Increase of  $\geq 25\%$  from baseline in:
  - involved serum free light chain (LC) level, with parallel change in serum kappa/lambda ratio
  - serum level of entire monoclonal Ig, if present
  - % of bone marrow plasma cell infiltration (the absolute % must be  $\geq 10\%$ )
- Confirmed development of new lytic bone lesions or soft tissue plasmacytomas or confirmed increase in the size of existing bone lesions or soft tissue plasmacytomas.
- Development of hypercalcemia (corrected serum calcium  $> 11.5$  mg/dl or  $2.65$  mmol/l) than can be attributed solely to the plasma cell proliferative disorder.

**Relapse from complete remission**, at least one of the following:

- Reappearance of the serum or urine monoclonal Ig, detectable by immunofixation or electrophoresis
- Reappearance of an abnormal serum free LC level
- Reappearance of  $\geq 5\%$  dystrophic plasma cells on bone marrow aspiration
- Any other sign of disease progression

**Stable Disease (SD): not meeting criteria for PR, VGPR, CR, PD or relapse**

Adapted from Durie BGM et al. International uniform response criteria for multiple myeloma. *Leukemia* 2006; 20: 1467-1473.

#### **APPENDIX 4. C-VTD regimen**

##### **C-VTD (Cyclophosphamide + Bortezomib + Thalidomide+ Dexamethasone)**

- Cyclophosphamide: 600 mg/m<sup>2</sup> through a short IV infusion on day 1. In patients requiring dialysis support, cyclophosphamide should be given at the end of a dialysis session.
- Bortezomib 1.3 mg/m<sup>2</sup>IV **twice** a week for 2 weeks (days 1 and 8), followed by a 13-day period without treatment (days 9-21).
- Thalidomide: a daily single dose of 50 mg/day, given orally every evening for 15 days. If the treatment is well tolerated, thalidomide dose will be increased of 50 mg/day every 15 days, up to a daily dose of 100 mg.
- Dexamethasone 20 mg/day in the morning of days 1, 2, and 8, 9, i.e. on the day and the day after each injection of bortezomib. In case of gastro-intestinal symptoms (vomiting) steroid therapy should be administrated IV (for example, by substituting dexamethasone 20 mg by Solumedrol 200 mg).

**APPENDIX 5: Durie Salmon and ISS staging systems for multiple myeloma.**

| Stage | Durie-Salmon                                                                                                                                                                                                               | ISS                                                             |
|-------|----------------------------------------------------------------------------------------------------------------------------------------------------------------------------------------------------------------------------|-----------------------------------------------------------------|
| I     | All of the following present:<br>- Hb>10 g/dL<br>- Serum IgG <50 g/L<br>- Serum IgA <30 g/L<br>- Normal serum calcium (<3 mmol/l)<br>- No generalized lytic bone lesions<br>- Urine monoclonal protein excretion < 4 g/day | Serum beta2-microglobulin<3.5 mg/l<br>and serum albumin >35 g/l |
| II    | Neither stage I nor stage III                                                                                                                                                                                              | Neither stage I nor stage III                                   |
| III   | One or more of the following:<br>- Hb< 8.5 g/dl<br>- Serum IgG >70 g/l<br>- Serum IgA >50 g/l<br>- Serum calcium >3 mmol/l<br>- Advanced lytic bone lesions<br>- Urine monoclonal protein excretion >12 g/day              | Serum beta2-microglobulin>5.5 mg/l                              |
| A     | Serum creatinine <20 mg/l (177 µmol/l)                                                                                                                                                                                     |                                                                 |
| B     | Serum creatinine >20 mg/l (177 µmol/l)                                                                                                                                                                                     |                                                                 |

## APPENDIX 6: Eastern Cooperative Oncology Group (ECOG) performans status

| Grade | Eastern Cooperative Oncology Group                                                                                                                        |
|-------|-----------------------------------------------------------------------------------------------------------------------------------------------------------|
| 0     | Fully active, able to carry on all pre-disease performance without restriction                                                                            |
| 1     | Restricted in physically strenuous activity but ambulatory and able to carry out work of a light or sedentary nature, e.g., light house work, office work |
| 2     | Ambulatory and capable of all selfcare but unable to carry out any work activities. Up and about more than 50% of waking hours                            |
| 3     | Capable of only limited selfcare, confined to bed or chair more than 50% of waking hours                                                                  |
| 4     | Completely disabled. Cannot carry on any selfcare. Totally confined to bed or chair                                                                       |
| 5     | Dead                                                                                                                                                      |

From Oken MM, Creech RH, Tormey DC, et al. Toxicity and response criteria of the Eastern Cooperative Oncology group. Am J Clin Oncol 1982; 5: 649-655

**APPENDIX 7: New York Heart Association (NYHA) functional classification system for congestive heart failure.**

- Class I: patients with cardiac disease but without resulting limitation of physical activity. Ordinary physical activity does not cause undue fatigue, palpitation, dyspnoea, or angina pain.
- Class II: patients with cardiac disease resulting in slight limitation of physical activity. They are comfortable at rest. Ordinary physical activity results in fatigue, palpitation, dyspnoea, or angina pain.
- Class III: patients with cardiac disease resulting in marked limitation of physical activity. They are comfortable at rest. Less than ordinary physical activity causes fatigue, palpitation, dyspnoea, or angina pain.
- Class IV: patients with cardiac disease resulting in inability to carry on any physical activity without discomfort. Symptoms of heart failure or the anginal syndrome may be present even at rest. If any physical activity is undertaken, discomfort is increased.



APPENDIX 8. List of participating centres

| Ville    | Centre                             | Investigateur(s)                         | Email                                                                                  | N°centre |
|----------|------------------------------------|------------------------------------------|----------------------------------------------------------------------------------------|----------|
| AMIENS   | CHU AMIENS                         | <b>Pr G. CHOUKROUN, Dr R. MAKDASSI</b>   | <a href="mailto:choukroun.gabriel@chu-amiens.fr">choukroun.gabriel@chu-amiens.fr</a>   | 2        |
|          | GRUPE HOSPITALIER SUD              | Service de néphrologie.                  | <a href="mailto:neph@chu-amiens.fr">neph@chu-amiens.fr</a>                             |          |
| ANGERS   |                                    | <b>Dr B. ROYER</b>                       |                                                                                        | 3        |
|          |                                    | Service d'hématologie                    |                                                                                        |          |
|          | CHU ANGERS                         | <b>Pr JF SUBRA, Dr JF AUGUSTO</b>        | <a href="mailto:jfaugusto@chu-angers.fr">jfaugusto@chu-angers.fr</a>                   |          |
|          | HOPITAL HOTEL DIEU                 | Service de néphrologie                   |                                                                                        | 4        |
|          |                                    |                                          |                                                                                        | 5        |
|          |                                    | <b>Dr M. DIB</b>                         |                                                                                        |          |
|          |                                    | Service d'hématologie                    |                                                                                        |          |
| BOBIGNY  | HOPITAL AVICENNE                   | Dr C. GARDIN.                            | <a href="mailto:claud.gardin@avc.aphp.fr">claud.gardin@avc.aphp.fr</a>                 | 6        |
|          | (APHP)                             | <b>Pr. P. CASASSUS, Dr S. BRECHIGNAC</b> | <a href="mailto:sabine.brechignac@avc.aphp.fr">sabine.brechignac@avc.aphp.fr</a>       |          |
|          |                                    | Service d'hématologie                    | <a href="mailto:philippe.casassus@avc.aphp.fr">philippe.casassus@avc.aphp.fr</a>       | 61       |
|          | réfèrent néphrologie : Saint Louis | <b>Pr M.N PERALDI</b>                    | <a href="mailto:marie-noelle.peraldi@sis.aphp.fr">marie-noelle.peraldi@sis.aphp.fr</a> |          |
| BESANCON |                                    | Service de néphrologie                   |                                                                                        | 7        |
|          | CHU BESANCON                       | <b>Dr D. DUCLOUX, Pr. J.M. CHALOPIN</b>  | <a href="mailto:ddudoux@chu-besancon.fr">ddudoux@chu-besancon.fr</a>                   |          |
|          | HOPITAL JEAN MINJOZ                | Service de néphrologie                   | <a href="mailto:jmchalopin@chu-besancon.fr">jmchalopin@chu-besancon.fr</a>             |          |
|          |                                    | <b>Pr. E. DECONINCK</b>                  | <a href="mailto:edeconinck@chu-besancon.fr">edeconinck@chu-besancon.fr</a>             | 8        |
|          |                                    | Dr J. FONTAN                             | <a href="mailto:jfontan@chu-besancon.fr">jfontan@chu-besancon.fr</a>                   |          |
|          |                                    | Dr J. VUILLIER                           | <a href="mailto:jvuillier@chu-besancon.fr">jvuillier@chu-besancon.fr</a>               |          |
|          |                                    | Dr P. HELIAS                             | <a href="mailto:phelias@chu-besancon.fr">phelias@chu-besancon.fr</a>                   |          |
|          |                                    | Dr A. BRION                              | <a href="mailto:abrion@chu-besancon.fr">abrion@chu-besancon.fr</a>                     |          |
|          |                                    | Dr P. DELABY                             | <a href="mailto:pdelaby@chu-besancon.fr">pdelaby@chu-besancon.fr</a>                   |          |

|                     |                                                      |                                                                                           |                                                                                                                                                            |    |
|---------------------|------------------------------------------------------|-------------------------------------------------------------------------------------------|------------------------------------------------------------------------------------------------------------------------------------------------------------|----|
| PARIS               | CHU BICHAT<br>(APHP)                                 | Service d'hématologie<br><b>Pr E. DAUGAS ; Pr. F. VRTOVSNIK</b><br>Service de néphrologie | <a href="mailto:eric.daugas@bch.aphp.fr">eric.daugas@bch.aphp.fr</a><br><a href="mailto:francois.vrtovsник@bch.aphp.fr">francois.vrtovsник@bch.aphp.fr</a> | 9  |
|                     |                                                      |                                                                                           |                                                                                                                                                            | 1  |
|                     | référent hématologie : Hôpital<br>Saint Louis, Paris | <b>Pr JP. FERMAND</b><br>Service d'immuno-hématologie                                     | <a href="mailto:jpfermand@vahoo.fr">jpfermand@vahoo.fr</a>                                                                                                 |    |
| BORDEAUX            | CHU BORDEAUX                                         | <b>Pr C. COMBE</b><br>Service de néphrologie                                              | <a href="mailto:christian.combe@chu-bordeaux.fr">christian.combe@chu-bordeaux.fr</a>                                                                       | 10 |
|                     |                                                      |                                                                                           |                                                                                                                                                            | 11 |
|                     |                                                      | <b>Pr G. MARIT</b><br>Service d'hématologie                                               | <a href="mailto:gerald.marit@chu-bordeaux.fr">gerald.marit@chu-bordeaux.fr</a>                                                                             |    |
| BREST               | CHU BREST<br>HOPITAL MORVAN                          | <b>Pr C. BERTHOU</b><br>Service d'hématologie                                             |                                                                                                                                                            | 12 |
|                     |                                                      |                                                                                           |                                                                                                                                                            | 13 |
|                     |                                                      | <b>Pr Y. LEMEUR</b><br>Service de néphrologie                                             | <a href="mailto:yannick.lemeur@chu-brest.fr">yannick.lemeur@chu-brest.fr</a>                                                                               |    |
| CAEN                | CHU CAEN<br>HOPITAL CLEMENCEAU                       | <b>Dr M. MACRO</b><br>Service d'hématologie                                               | <a href="mailto:macro-m@chu-caen.fr">macro-m@chu-caen.fr</a>                                                                                               | 14 |
|                     |                                                      | <b>Dr M. FICHEUX, Dr A. THUILLIER<br/>LECOUF</b><br>Service de néphrologie                | <a href="mailto:ficheux-m@chu-caen.fr">ficheux-m@chu-caen.fr</a><br><a href="mailto:thuillierlecouf-a@chu-caen.fr">thuillierlecouf-a@chu-caen.fr</a>       | 15 |
| PARIS               | CHU COCHIN<br>(APHP)                                 | <b>Pr D. BOUSCARY</b><br>Service d'hématologie                                            | <a href="mailto:didier.bouscary@cochin.inserm.fr">didier.bouscary@cochin.inserm.fr</a>                                                                     | 16 |
|                     |                                                      |                                                                                           | <a href="mailto:didier.bouscary@cch.aphp.fr">didier.bouscary@cch.aphp.fr</a>                                                                               | 17 |
|                     | Référent néphrologie : Hôpital<br>Necker, Paris      | <b>Pr B KNEBELMANN</b><br>Service de néphrologie                                          | <a href="mailto:bertrand.knebelmann@nck.aphp.fr">bertrand.knebelmann@nck.aphp.fr</a>                                                                       |    |
| CLERMONT<br>FERRAND | CHU CLERMONT FERRAND<br>HOPITAL Gabriel Montpied     | <b>Pr M. SOUBRIER</b><br>Service de rhumatologie                                          |                                                                                                                                                            | 18 |
|                     |                                                      | <b>Dr A.E. HENG</b><br>Service de néphrologie                                             | <a href="mailto:aheng@chu-dermontferrand.fr">aheng@chu-dermontferrand.fr</a>                                                                               | 19 |
|                     |                                                      | <b>Pr JO BAY</b><br>Service de néphrologie                                                |                                                                                                                                                            | 20 |

|                       |                                                                                             |  |                                                  |  |                                                                                                                                                              |    |
|-----------------------|---------------------------------------------------------------------------------------------|--|--------------------------------------------------|--|--------------------------------------------------------------------------------------------------------------------------------------------------------------|----|
|                       |                                                                                             |  | Service d'hématologie                            |  |                                                                                                                                                              |    |
| DIJON                 | CHU DIJON                                                                                   |  | <b>Dr D. CAILLOT</b>                             |  | <a href="mailto:denis.caillot@chu-dijon.fr">denis.caillot@chu-dijon.fr</a>                                                                                   | 21 |
|                       | HOPITAL DU BOCAGE                                                                           |  | Service d'hématologie                            |  |                                                                                                                                                              |    |
|                       |                                                                                             |  | <b>Pr. C. MOUSSON, JM. REBIBOU</b>               |  | <a href="mailto:christiane.mousson@chu-dijon.fr">christiane.mousson@chu-dijon.fr</a><br><a href="mailto:jmrebibou@gmail.com">jmrebibou@gmail.com</a>         | 22 |
|                       |                                                                                             |  | Service de néphrologie                           |  |                                                                                                                                                              |    |
| PARIS                 | CHU GEORGES POMPIDOU<br>HOPITAL EUROPEEN (APHP)<br>réfèrent hématologie : Hôpital<br>Cochin |  | <b>Dr A. KARRAS</b>                              |  | <a href="mailto:alexandre.karras@egp.aphp.fr">alexandre.karras@egp.aphp.fr</a>                                                                               | 23 |
|                       |                                                                                             |  | Service de néphrologie                           |  |                                                                                                                                                              |    |
|                       |                                                                                             |  | <b>Pr D. BOUSCARY</b>                            |  | <a href="mailto:didier.bouscary@cch.aphp.fr">didier.bouscary@cch.aphp.fr</a>                                                                                 | 16 |
|                       |                                                                                             |  | Service d'hématologie                            |  |                                                                                                                                                              |    |
| GRENOBLE              | CHU GRENOBLE                                                                                |  | <b>Dr B. PEGOURIE</b>                            |  | <a href="mailto:bpegourie@chu-grenoble.fr">bpegourie@chu-grenoble.fr</a>                                                                                     | 24 |
|                       | HOPITAL ALBERT MICHALLON                                                                    |  | Pr. J.Y. CAHN                                    |  | <a href="mailto:JYcahn@chu-grenoble.fr">JYcahn@chu-grenoble.fr</a>                                                                                           |    |
|                       |                                                                                             |  | Service d'onco-hématologie                       |  |                                                                                                                                                              |    |
|                       |                                                                                             |  | <b>Dr P.L. CARRON, Dr J. MAURIZI-<br/>BALZAN</b> |  | <a href="mailto:plcarron@chu-grenoble.fr">plcarron@chu-grenoble.fr</a><br><a href="mailto:JMaunzi-balzan@chu-grenoble.fr">JMaunzi-balzan@chu-grenoble.fr</a> | 25 |
|                       |                                                                                             |  | Service de néphrologie                           |  |                                                                                                                                                              |    |
| CRETEIL               | CHU HENRI MONDOR<br>(APHP)                                                                  |  | <b>Dr K. BELHADJ</b>                             |  | <a href="mailto:karim.belhadj@hmn.aphp.fr">karim.belhadj@hmn.aphp.fr</a>                                                                                     | 26 |
|                       |                                                                                             |  | Service d'hématologie                            |  |                                                                                                                                                              |    |
|                       |                                                                                             |  | <b>Dr V. AUDARD</b>                              |  |                                                                                                                                                              |    |
|                       |                                                                                             |  | Service de néphrologie                           |  |                                                                                                                                                              |    |
| BONDY                 | CHU JEAN VERDIER<br>(APHP)                                                                  |  | <b>Pr. O. FAIN</b>                               |  | <a href="mailto:olivier.fain@ivr.aphp.fr">olivier.fain@ivr.aphp.fr</a>                                                                                       | 27 |
|                       |                                                                                             |  | Service d'hématologie                            |  |                                                                                                                                                              |    |
|                       |                                                                                             |  | <b>Pr M.N. PERALDI</b>                           |  | <a href="mailto:marie-noelle.peraldi@sis.aphp.fr">marie-noelle.peraldi@sis.aphp.fr</a>                                                                       | 61 |
|                       | réfèrent néphrologie : Hôpital<br>Saint Louis, Paris                                        |  | Service de néphrologie                           |  |                                                                                                                                                              |    |
| LE KREMLIN<br>BICETRE | CHU KREMLIN BICETRE                                                                         |  | <b>Pr. B. CHARPENTIER, Dr A.<br/>DURRBACH</b>    |  | <a href="mailto:bernard.charpentier@bct.aphp.fr">bernard.charpentier@bct.aphp.fr</a>                                                                         | 28 |

|           |                                                     |                                                  |                                                                                                                                                                          |    |
|-----------|-----------------------------------------------------|--------------------------------------------------|--------------------------------------------------------------------------------------------------------------------------------------------------------------------------|----|
|           | (APHP)                                              | Service de néphrologie<br>Dr O. LAMBOTTE         | <a href="mailto:olivier.lamboite@bct.aphp.fr">olivier.lamboite@bct.aphp.fr</a>                                                                                           | 29 |
|           |                                                     | Service d'Hématologie<br>Dr X. MARIETTE          | <a href="mailto:xavier.mariette@bct.aphp.fr">xavier.mariette@bct.aphp.fr</a>                                                                                             |    |
| LILLE     | CHU LILLE                                           | Dr F. PROVOT<br>Dr F GLOWACKI                    | <a href="mailto:f-provot@chru-lille.fr">f-provot@chru-lille.fr</a><br><a href="mailto:f-glowacki@chru-lille.fr">f-glowacki@chru-lille.fr</a>                             | 30 |
|           |                                                     | Service de néphrologie                           |                                                                                                                                                                          | 31 |
|           |                                                     | Pr. T. FACON<br>Service d'hématologie            | <a href="mailto:t-facon@chru-lille.fr">t-facon@chru-lille.fr</a>                                                                                                         |    |
| LIMOGES   | CHU LIMOGES<br>HOPITAL DUPUYTREN                    | Pr. M. ESSIG<br>Service de néphrologie           | <a href="mailto:messig@limoges.inserm.fr">messig@limoges.inserm.fr</a>                                                                                                   | 32 |
|           |                                                     | Pr. A. JACCARD<br>Service d'hématologie clinique | <a href="mailto:arnaud.jaccard@chu-limoges.fr">arnaud.jaccard@chu-limoges.fr</a>                                                                                         |    |
| LYON      | CHU LYON<br>HOPITAL EDOUARD HERRIOT<br>(HCL)        | Dr L. JUILLARD<br>Service de néphrologie         | <a href="mailto:laurent.juillard@chu-lyon.fr">laurent.juillard@chu-lyon.fr</a>                                                                                           | 34 |
|           |                                                     | Pr. M. MICHALLET<br>Dr S. DUCASTELLE LE PRETRE   | <a href="mailto:mauricette.michallet@chu-lyon.fr">mauricette.michallet@chu-lyon.fr</a>                                                                                   | 35 |
|           |                                                     | Service d'hématologie                            |                                                                                                                                                                          |    |
| LYON      | CHU LYON SUD<br>(HCL)                               | Pr. C. POUTEIL-NOBLE<br>Dr E. VILLAR             | <a href="mailto:claire.pouteil-noble@chu-lyon.fr">claire.pouteil-noble@chu-lyon.fr</a><br><a href="mailto:emmanuel.villiar@chu-lyon.fr">emmanuel.villiar@chu-lyon.fr</a> | 37 |
|           |                                                     | Service de néphrologie                           |                                                                                                                                                                          | 36 |
|           |                                                     | Pr G. SALLES<br>Service d'hématologie            | <a href="mailto:gilles.salles@chu-lyon.fr">gilles.salles@chu-lyon.fr</a>                                                                                                 |    |
| MARSEILLE | CHU MARSEILLE<br>HOPITAL DE LA CONCEPTION<br>(APHM) | Dr S. BURTEY<br>Service de néphrologie           | <a href="mailto:stephaneb@ap-hm.fr">stephaneb@ap-hm.fr</a>                                                                                                               | 38 |
|           |                                                     | référent hématologie : Institut                  |                                                                                                                                                                          | 39 |

|                        | Paoli Calmettes, Marseille                        | Service d'hématologie                                                                                                                                                                                                                           |                |
|------------------------|---------------------------------------------------|-------------------------------------------------------------------------------------------------------------------------------------------------------------------------------------------------------------------------------------------------|----------------|
| VANDEUVRE<br>LES NANCY | CHU NANCY<br>HOPITAL D'ADULTE<br>HOPITAUX BRABOIS | <b>Dr C. HULIN</b><br>Service d'hématologie<br><b>Pr. L. FRIMAT</b><br>Dr J. CRIDLIG<br>Service de néphrologie                                                                                                                                  | 40<br>41       |
| NANTES                 | CHU NANTES<br>HOPITAL HOTEL DIEU                  | <b>Pr M. HOURMANT</b><br>Dr. M. LINO-DANIEL<br>Service de néphrologie                                                                                                                                                                           | 42<br>43       |
| PARIS                  | CHU NECKER<br>(APHP)                              | <b>Pr P. MOREAU</b><br>Service d'hématologie clinique<br>Dr A. SERVAIS<br><b>Pr B. KNEBELMANN</b><br>Service de néphrologie                                                                                                                     | 17<br>44       |
| NICE                   | CHU NICE                                          | <b>Dr R. DELARUE, Pr O. HERMINE</b><br>Service d'hématologie clinique adulte<br><b>Pr V. ESNAULT</b><br>Dr G. FAVRE<br>Service de néphrologie<br><b>Pr JG FUZIBET</b><br>Service d'hématologie<br><b>Pr V. LEBLOND</b><br>Service d'hématologie | 45<br>46<br>47 |
|                        |                                                   | <b>Pr C. ISNARD BAGNIS</b><br>Service de néphrologie                                                                                                                                                                                            | 48             |

|          |                                                         |                                                                            |                                                                 |    |
|----------|---------------------------------------------------------|----------------------------------------------------------------------------|-----------------------------------------------------------------|----|
| POITIERS | CHU POITIERS                                            | Pr. G TOUCHARD<br>Pr. F BRIDOUX<br>Service de néphrologie<br>Dr L. LACOTTE | g.toucharde@chu-poitiers.fr<br>f.bridoux@chu-poitiers.fr        | 49 |
|          |                                                         |                                                                            |                                                                 |    |
|          |                                                         | Pr. F GUILHOT-GAUDEFROY<br>Service d'hématologie et oncologie médicale     | f.quilhot@chu-poitiers.fr<br>J.lacotte@chu-poitiers.fr          | 50 |
|          |                                                         |                                                                            |                                                                 |    |
| REIMS    | CHU REIMS<br>HOPITAL de la maison blanche               | Dr. A. WYNCKEL<br>Pr. P. RIEU<br>Service de néphrologie                    | awynckel@chu-reims.fr<br>prieu@chu-reims.fr                     | 51 |
|          |                                                         |                                                                            |                                                                 |    |
|          |                                                         | Dr B. KOLB<br>Service d'hématologie                                        |                                                                 | 52 |
|          |                                                         |                                                                            |                                                                 |    |
| RENNES   | CHU RENNES<br>HOPITAL PONTCHAILLON                      | Pr. P. LE POGAMP<br>Dr C. VIGNEAU<br>Service de néphrologie                | patrick.le.pogamp@chu-rennes.fr<br>cecile.vigneau@chu-rennes.fr | 53 |
|          |                                                         |                                                                            |                                                                 |    |
|          |                                                         | Dr O. DECAUX<br>Service de médecine interne                                | olivier.decaux@chu-rennes.fr                                    | 54 |
|          |                                                         |                                                                            |                                                                 |    |
|          |                                                         | Dr M. ESCOFFRE-BARBE<br>Service d'hématologie                              | martine.escoffre-barbe@chu-rennes.fr                            | 55 |
|          |                                                         |                                                                            |                                                                 |    |
| ROUEN    | CHU ROUEN<br>HOPITAL DE BOIS GUILLAUME                  | Dr P. LENAIN<br>Service d'hématologie                                      |                                                                 | 56 |
|          |                                                         |                                                                            |                                                                 |    |
|          | référent hématologie : Centre<br>Henri Becquerel, Rouen | Dr. F. LE ROY, Dr P. HENRI<br>Service de néphrologie                       |                                                                 | 57 |
|          |                                                         |                                                                            |                                                                 |    |
| PARIS    | CHU SAINT ANTOINE<br>(APHP)                             | Dr L. GARDERET<br>Service d'hématologie                                    | laurent.garderet@sat.aphp.fr                                    | 58 |
|          |                                                         |                                                                            |                                                                 |    |
|          | référent hématologie : Hôpital<br>Tenon                 | Pr P. RONCO, Dr S. CHAUVET<br>Service de néphrologie                       | pierre.ronco@tnn.aphp.fr                                        | 95 |
|          |                                                         |                                                                            |                                                                 |    |

|            |                                |                                                                 |                                                                                            |    |
|------------|--------------------------------|-----------------------------------------------------------------|--------------------------------------------------------------------------------------------|----|
| ST ETIENNE | CHU SAINT ETIENNE              | <b>Pr. E. ALAMARTINE</b><br>Service de néphrologie              | <a href="mailto:eric.alamartine@univ-st-etienne.fr">eric.alamartine@univ-st-etienne.fr</a> | 59 |
|            | HOPITAL NORD                   | <b>Dr J. JAUBERT</b><br>Service d'hématologie                   | <a href="mailto:jerome.jaubert@chu_st-etienne.fr">jerome.jaubert@chu_st-etienne.fr</a>     | 60 |
| PARIS      | CHU SAINT LOUIS<br>(APHP)      | <b>Pr JP. FERMAND</b><br>Service d'immuno-hématologie           | <a href="mailto:jpfermand@yahoo.fr">jpfermand@yahoo.fr</a>                                 | 1  |
|            |                                |                                                                 | <a href="mailto:mnperaldi@gmail.com">mnperaldi@gmail.com</a>                               | 61 |
|            |                                | <b>Pr M. N. PERALDI</b><br>Service de néphrologie               | <a href="mailto:marie-noelle.peraldi@sls.aphp.fr">marie-noelle.peraldi@sls.aphp.fr</a>     |    |
| STRASBOURG | CHU STRASBOURG                 | <b>Dr B. LIOURE</b><br>Service hématologie et oncologie         | <a href="mailto:bruno.lioure@chru-strasbourg.fr">bruno.lioure@chru-strasbourg.fr</a>       | 62 |
|            |                                |                                                                 |                                                                                            | 63 |
|            |                                | <b>Pr. B MOULIN</b><br>Service de néphrologie                   | <a href="mailto: Bruno.Moulin@nephro.u-strasbg.fr">Bruno.Moulin@nephro.u-strasbg.fr</a>    |    |
| PARIS      | CHU TENON<br>(APHP)            | <b>Pr. E. RONDEAU</b><br>Service de néphrologie A               | <a href="mailto:eric.rondeau@tnn.ap-hop-paris.fr">eric.rondeau@tnn.ap-hop-paris.fr</a>     | 64 |
|            |                                | <b>Dr. J.J. BOFFA, Pr. P. RONCO</b><br>Service de néphrologie B | <a href="mailto:jean-jacques.boffa@tnn.aphp.fr">jean-jacques.boffa@tnn.aphp.fr</a>         | 95 |
|            |                                |                                                                 | <a href="mailto:pierre.ronco@tnn.aphp.fr">pierre.ronco@tnn.aphp.fr</a>                     |    |
|            | référent hématologie :         |                                                                 |                                                                                            |    |
|            | Hôpital Saint Louis            | <b>Pr JP. FERMAND</b> Service d'immuno-hématologie              | <a href="mailto:jpfermand@yahoo.fr">jpfermand@yahoo.fr</a>                                 | 1  |
|            | Hôpital Saint Antoine          | <b>Dr L. GARDERET</b> , Service d'hématologie                   | <a href="mailto:laurent.garderet@sat.aphp.fr">laurent.garderet@sat.aphp.fr</a>             | 58 |
| TOULOUSE   | CHU TOULOUSE<br>HOPITAL PURPAN | <b>Pr. D. CHAUVEAU</b><br>Service de néphrologie                | <a href="mailto:chauveau.d@chu-toulouse.fr">chauveau.d@chu-toulouse.fr</a>                 | 65 |
|            |                                | <b>Pr. J. POURRAT</b><br>Service de néphrologie                 | <a href="mailto:pourratj@chu-toulouse.fr">pourratj@chu-toulouse.fr</a>                     |    |
|            |                                | <b>Pr. M. ATTAL, Dr M. ROUSSEL</b><br>Service d'hématologie     | <a href="mailto:attal.m@chu-toulouse.fr">attal.m@chu-toulouse.fr</a>                       | 66 |
| TOURS      | CHU TOURS                      | <b>Pr M. BÜCHLER</b> , Pr J.M. HALIMI,                          | <a href="mailto:buchler@med.univ-tours.fr">buchler@med.univ-tours.fr</a>                   | 67 |

|                     |                                                            |                                                               |                                                                                                                                                                                                                                  |  |    |
|---------------------|------------------------------------------------------------|---------------------------------------------------------------|----------------------------------------------------------------------------------------------------------------------------------------------------------------------------------------------------------------------------------|--|----|
|                     | HOPITAL BRETONNEAU                                         | Dr N. RABOT; Dr M. FRANCOIS<br>Service de néphrologie         | <a href="mailto:halimi@med.univ-tours.fr">halimi@med.univ-tours.fr</a><br><a href="mailto:nolwenn.rabot@univ-tours.fr">nolwenn.rabot@univ-tours.fr</a><br><a href="mailto:ma.francois@chu-tours.fr">ma.francois@chu-tours.fr</a> |  |    |
|                     |                                                            | <b>Dr L. BENBOUBKER</b><br>Service d'hématologie              |                                                                                                                                                                                                                                  |  | 68 |
| MONTREUIL           | CH André Grégoire                                          | <b>Dr X. BELENFANT</b><br>Service de néphrologie              | <a href="mailto:xavier.belenfant@chi-andre-gregoire.fr">xavier.belenfant@chi-andre-gregoire.fr</a>                                                                                                                               |  | 69 |
|                     |                                                            | <b>Dr M. LENOBLE</b><br>Service d'hématologie                 |                                                                                                                                                                                                                                  |  | 90 |
| ANGOULEME           | CH ANGOULEME<br><br>Réfèrent néphrologie : CHU<br>Poitiers | <b>Dr L. YVER</b><br>service de néphrologie                   | <a href="mailto:laurent.yver@ch-angouleme.fr">laurent.yver@ch-angouleme.fr</a>                                                                                                                                                   |  | 70 |
|                     |                                                            | <b>Dr L. LACOTTE</b><br>Service d'hématologie                 |                                                                                                                                                                                                                                  |  | 94 |
| AVIGNON             | CH Avignon                                                 | <b>Dr P. GOBERT</b><br>Service de néphrologie                 | <a href="mailto:pgobert@ch-avignon.fr">pgobert@ch-avignon.fr</a>                                                                                                                                                                 |  | 71 |
|                     |                                                            | <b>Dr B. SLAMA</b><br>Service d'hématologie                   |                                                                                                                                                                                                                                  |  | 72 |
| TARBES              | CH BIGORRE<br>HOPITAL DE TARBES                            | <b>Dr M. HEMERY ; Dr F. REYNAUD</b><br>service de néphrologie | <a href="mailto:freynaud@ch-tarbes-vic.fr">freynaud@ch-tarbes-vic.fr</a><br><a href="mailto:mhemery@ch-tarbes-vic.fr">mhemery@ch-tarbes-vic.fr</a>                                                                               |  | 73 |
|                     |                                                            | <b>Dr C. DINGREMONT</b><br>service d'hématologie              |                                                                                                                                                                                                                                  |  | 91 |
| BOULOGNE<br>SUR MER | CH BOULOGNE SUR MER                                        | <b>Dr P. BATAILLE</b><br>service de néphrologie               | <a href="mailto:pierrebataille@aol.com">pierrebataille@aol.com</a>                                                                                                                                                               |  | 74 |
|                     |                                                            |                                                               |                                                                                                                                                                                                                                  |  | 75 |



|                  |                     |                                                                                                                                 |                                                                                            |    |
|------------------|---------------------|---------------------------------------------------------------------------------------------------------------------------------|--------------------------------------------------------------------------------------------|----|
|                  |                     | <b>Dr B. CHOUFFI</b><br>Service d'hématologie                                                                                   | <a href="mailto:b.chouffi@ch-boulogne.fr">b.chouffi@ch-boulogne.fr</a>                     |    |
| CHARTRES         | CH CHARTRES         | <b>Dr C. GODART</b><br>Service de néphrologie                                                                                   | <a href="mailto:cgodart@ch-chartres.fr">cgodart@ch-chartres.fr</a>                         | 76 |
|                  |                     | <b>Dr M. MAIGRE</b><br>Service d'hématologie                                                                                    |                                                                                            | 77 |
| DUNKERQUE        | CH DUNKERQUE        | <b>Dr R. AZAR</b><br>Service de néphrologie                                                                                     | <a href="mailto:raymond.azard@ch-dunkerque.fr">raymond.azard@ch-dunkerque.fr</a>           | 78 |
|                  |                     |                                                                                                                                 |                                                                                            | 79 |
| SURESNES         | CH FOCH             | <b>Dr A. KOLKO</b><br>Service de néphrologie                                                                                    | <a href="mailto:akolko@club-internet.fr">akolko@club-internet.fr</a>                       | 80 |
|                  |                     | <b>Dr S. GLAISNER</b><br>Service d'hématologie                                                                                  |                                                                                            | 81 |
| LE HAVRE         | CH LE HAVRE         | <b>Dr C. ZARNITSKY</b><br>Service de rhumatologie                                                                               | <a href="mailto:czarnitsky@ch-havre.fr">czarnitsky@ch-havre.fr</a>                         | 82 |
|                  |                     | <b>Dr N. GESLIN</b><br>Service d'hématologie                                                                                    | <a href="mailto:noel.geslin@ch.havre.fr">noel.geslin@ch.havre.fr</a>                       | 92 |
| LA ROCHE sur YON | CH LA ROCHE sur YON | <b>Dr J.N. OTTAVIOLI</b><br>Service de néphrologie                                                                              | <a href="mailto:jean-noel.ottavioli@chd-vendee.fr">jean-noel.ottavioli@chd-vendee.fr</a>   | 83 |
|                  |                     | <b>Dr M. TIAB, Dr B. VILLEMAGNE, Dr H. MAISONNEUVE, Dr T. CHATELLIER, Dr T.L. HARIDON, Dr F. PRIOU</b><br>Service d'hématologie | <a href="mailto:mourad.tiab@chd-vendee.fr">mourad.tiab@chd-vendee.fr</a>                   | 84 |
| CORBEIL          |                     | <b>Dr B. JOLY</b>                                                                                                               | <a href="mailto:bertrand.joly@ch-sud-francilien.fr">bertrand.joly@ch-sud-francilien.fr</a> | 85 |

|              |                                              |                                               |                                                                              |    |
|--------------|----------------------------------------------|-----------------------------------------------|------------------------------------------------------------------------------|----|
| ESSONNES     | CH Sud Francilien                            | Service d'hématologie<br><b>Dr V. CAUDWEL</b> |                                                                              | 86 |
|              |                                              | Service de néphrologie                        |                                                                              |    |
| VALENCIENNES | CH Valenciennes                              | <b>Dr. R. BINAUT</b>                          | <a href="mailto:binaut-r@ch-valenciennes.fr">binaut-r@ch-valenciennes.fr</a> | 87 |
|              |                                              | Service de néphrologie                        |                                                                              | 88 |
|              |                                              | <b>Dr J.P. POLLET</b>                         |                                                                              |    |
|              |                                              | Service d'hématologie                         |                                                                              |    |
| Villejuif    | Institut Gustave Roussy (IGR)                | <b>Dr V. RIBRAG</b>                           | <a href="mailto:ribrag@igr.fr">ribrag@igr.fr</a>                             | 89 |
|              |                                              | Service d'hématologie                         |                                                                              |    |
|              |                                              |                                               |                                                                              |    |
|              |                                              |                                               |                                                                              |    |
|              | réfèrent néphrologie : Le Kremlin<br>Bicêtre | <b>Pr A. DURRBACH</b>                         |                                                                              | 96 |
|              |                                              | service de néphrologie                        |                                                                              |    |

**APPENDIX 9. Study synopsis: inclusion/screening period prior to randomization**

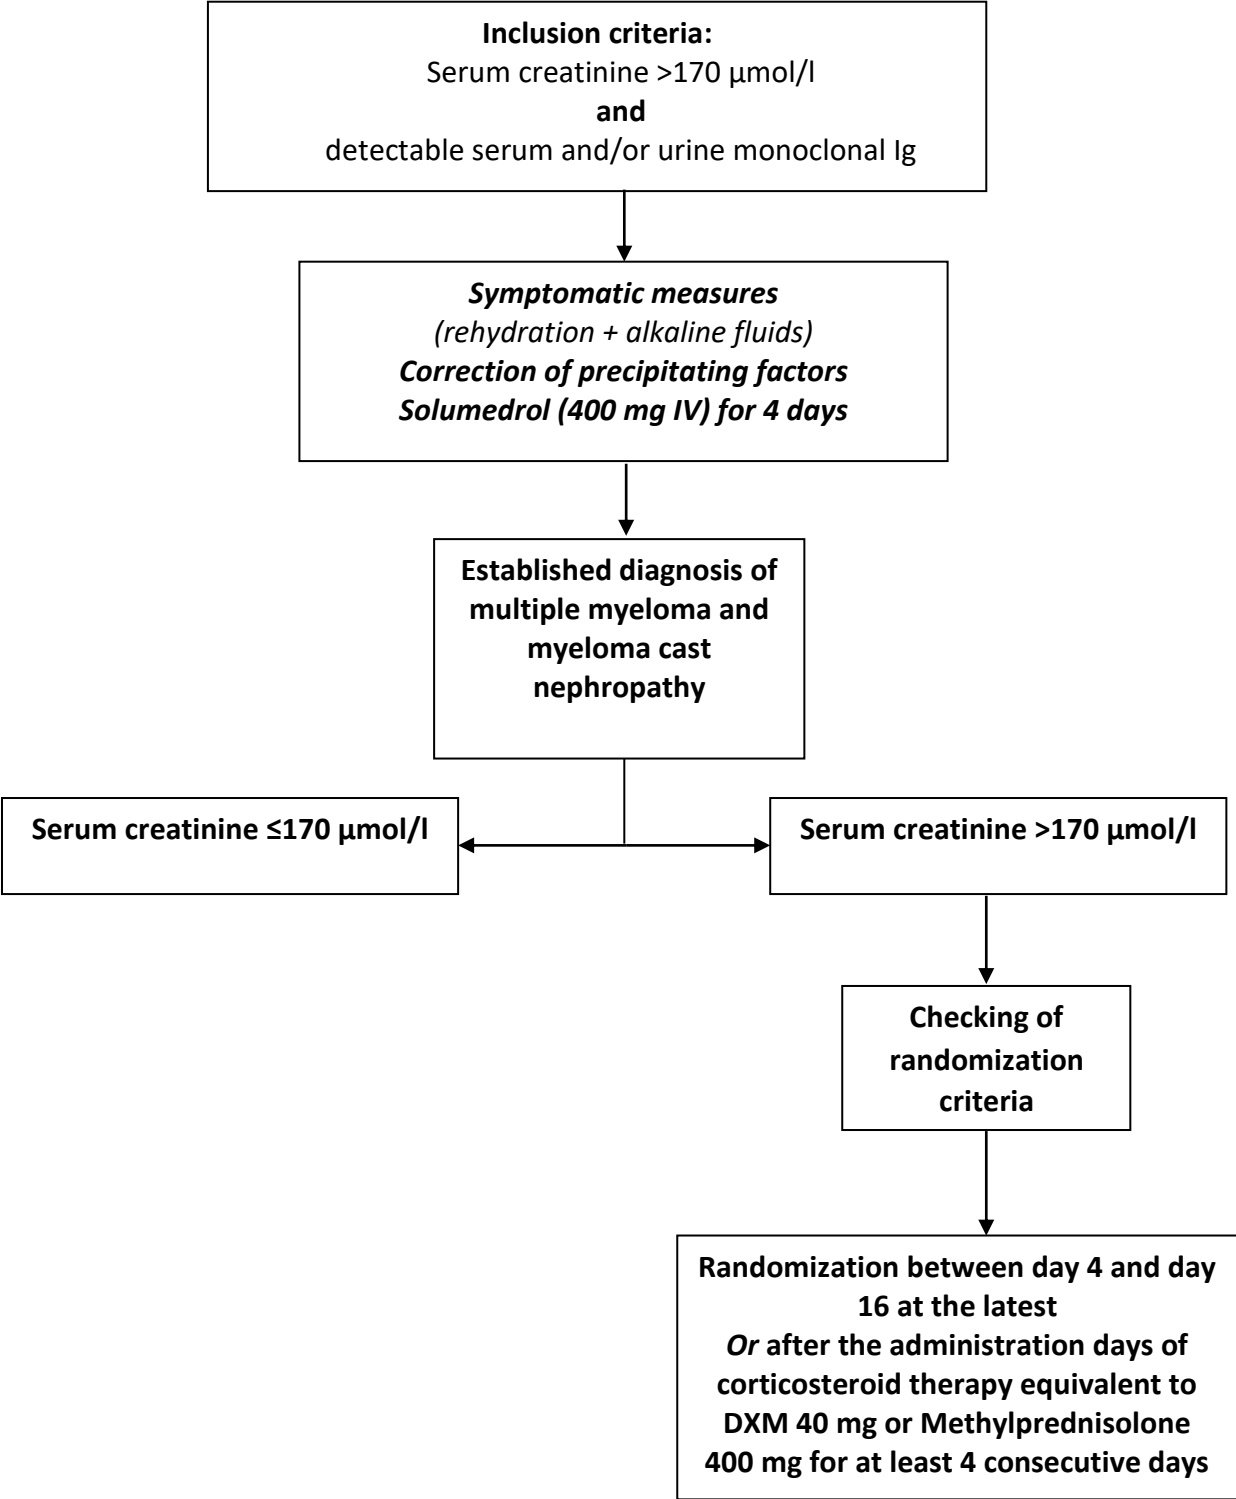

**APPENDIX 10. Study synopsis - Patients not requiring dialysis: randomization for chemotherapy**

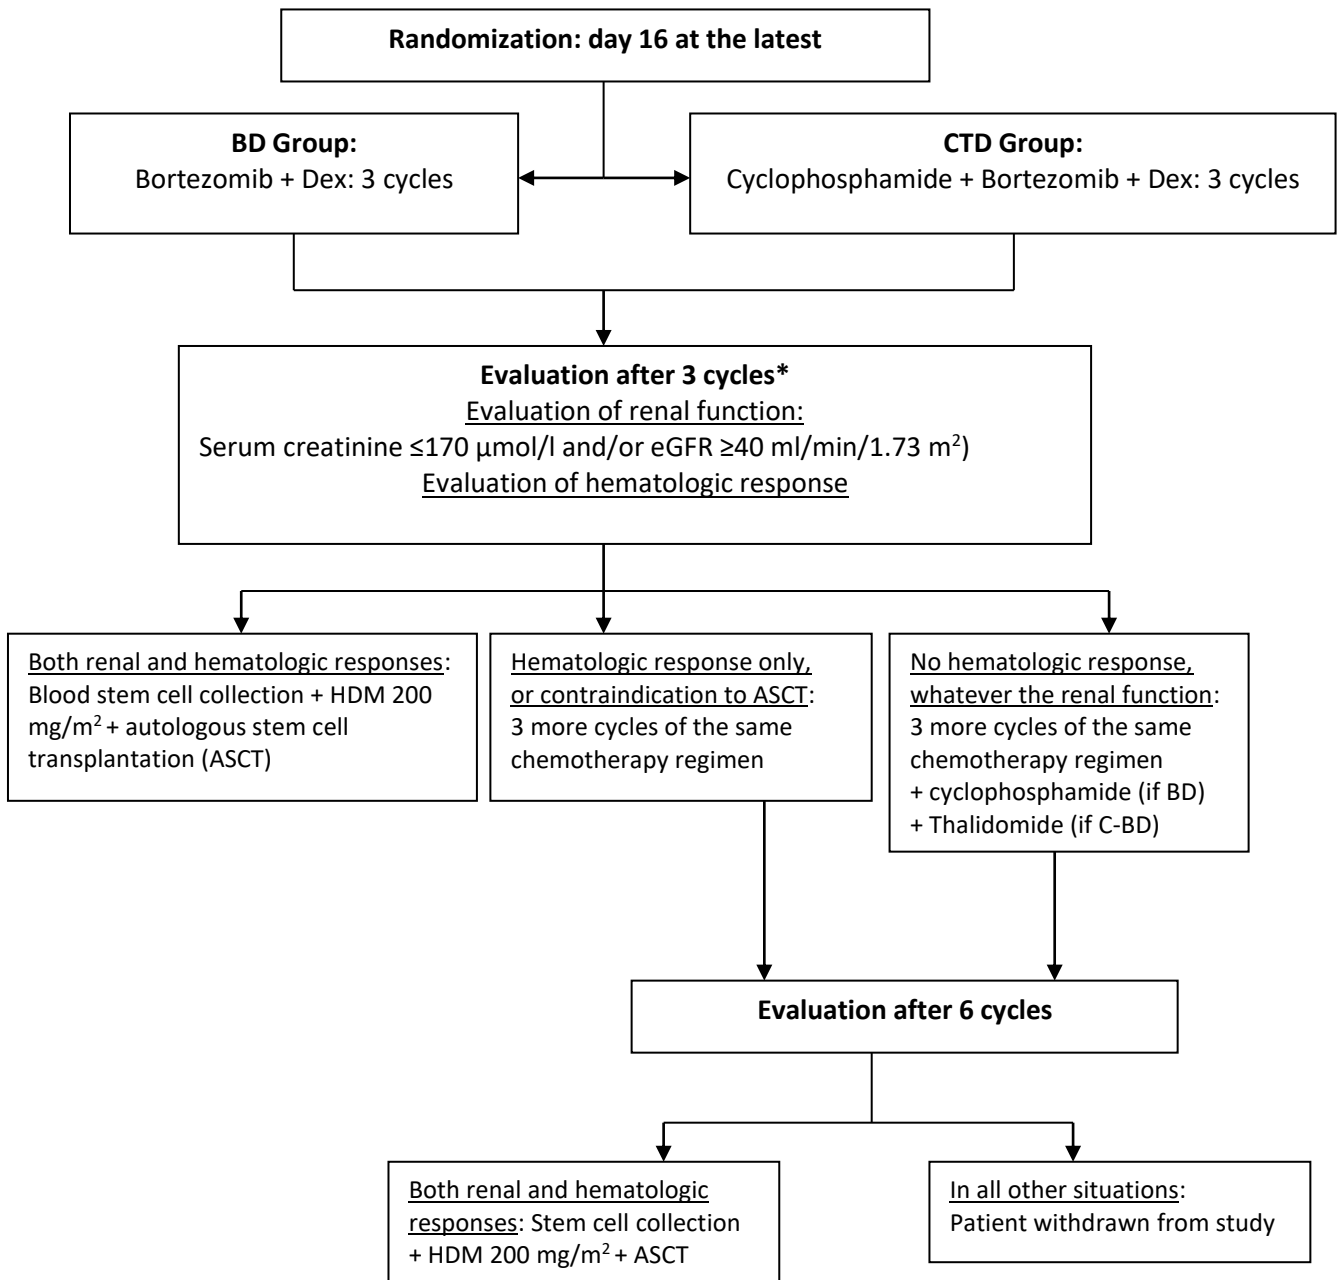

\* For patients requiring hemodialysis before the second course of chemotherapy, and who are randomized for the dialysis membrane, B-CD is stopped and replaced by BD.

**APPENDIX 11. Study synopsis - Patients requiring hemodialysis: randomization for the hemodialysis membrane**

**Randomization:**

- If hemodialysis is required during the inclusion/screening phase:

Randomization will occur at the first dialysis session after pathological confirmation of MCN, or at the second dialysis session if urgent dialysis is needed.

- If hemodialysis is required in patients already randomized for chemotherapy:

Randomization will occur before the second course of chemotherapy. If patients have already received a course of CTD, they will be switched to BD for the following courses

**Chemotherapy regimen (all patients):**

Bortezomib + Dexamethasone (BD).

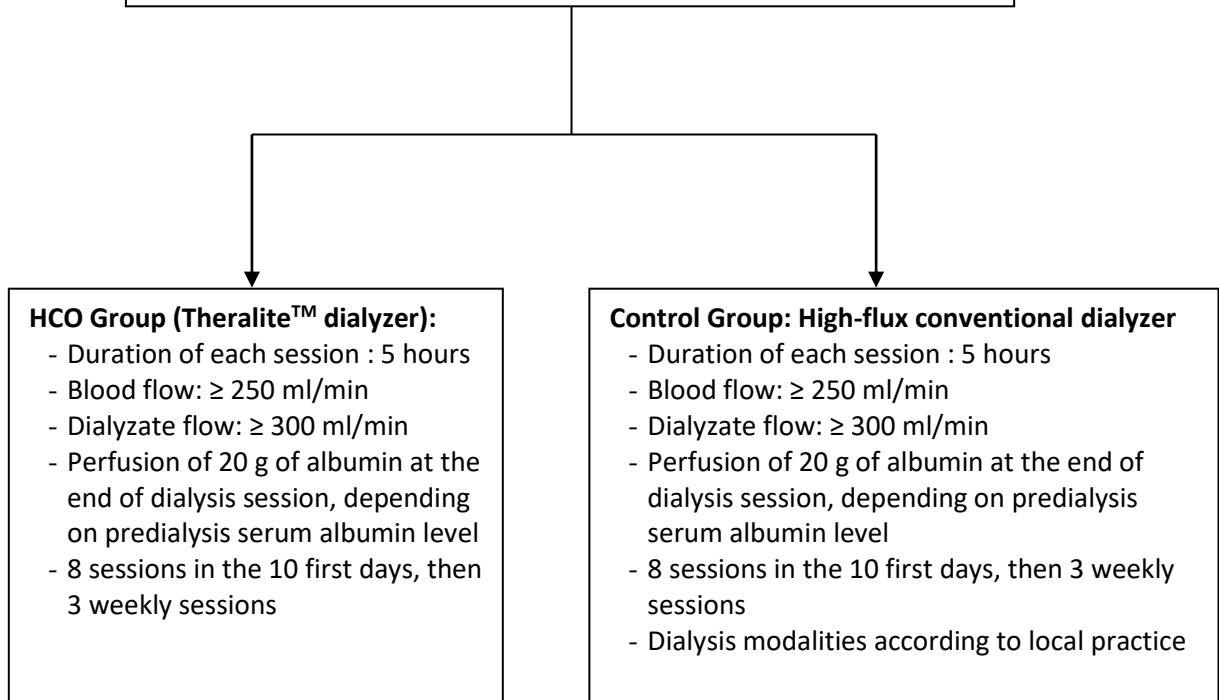

**APPENDIX 12. Summary of Product Characteristics (SmPC) (French versions)**

Bortezomib (Velcade®)

Dexamethasone (Neodex®)

Methylprednisolone hemisuccinate (Solumédrol®)

Cyclophosphamide (Endoxan®)

Thalidomide

Theralite™ operating instructions

**SmPC Bortezomid Velcade ®**

## 1. DÉNOMINATION DU MÉDICAMENT

VELCADE 1 mg poudre pour solution injectable

## 2. COMPOSITION QUALITATIVE ET QUANTITATIVE

Chaque flacon contient 1 mg de bortézomib (sous forme d'ester boronique de mannitol).

Après reconstitution, 1 ml de solution pour injection intraveineuse contient 1 mg de bortézomib.

Pour la liste complète des excipients, voir rubrique 6.1.

## 3. FORME PHARMACEUTIQUE

Poudre pour solution injectable.

Poudre ou poudre agglomérée, blanc à blanc cassé.

## 4. DONNÉES CLINIQUES

### 4.1 Indications thérapeutiques

VELCADE, en monothérapie ou en association à la doxorubicine liposomale pégylée ou à la dexaméthasone, est indiqué pour le traitement des patients adultes atteints de myélome multiple en progression, ayant reçu au moins 1 traitement antérieur et ayant déjà bénéficié ou étant inéligibles à une greffe de cellules souches hématopoïétiques.

VELCADE, en association au melphalan et à la prednisone, est indiqué pour le traitement des patients adultes atteints de myélome multiple non traité au préalable, éligibles à la chimiothérapie intensive accompagnée d'une greffe de cellules souches hématopoïétiques.

VELCADE, en association à la dexaméthasone, ou à la dexaméthasone et au thalidomide, est indiqué pour le traitement d'induction des patients adultes atteints de myélome multiple non traité au préalable, éligibles à la chimiothérapie intensive accompagnée d'une greffe de cellules souches hématopoïétiques.

VELCADE, en association au rituximab, cyclophosphamide, doxorubicine et prednisone, est indiqué pour le traitement des patients adultes atteints d'un lymphome à cellules du manteau non traité au préalable, pour lesquels une greffe de cellules souches hématopoïétiques est inadaptée.

### 4.2 Posologie et mode d'administration

Le traitement par VELCADE doit être initié sous le contrôle d'un médecin expérimenté dans le traitement de patients atteints de cancer, néanmoins VELCADE peut être administré par un professionnel de santé expérimenté dans l'utilisation des agents chimiothérapeutiques. VELCADE doit être reconstitué par un professionnel de santé (voir rubrique 6.6).

Posologie pour le traitement du myélome multiple en progression (patients ayant reçu au moins un traitement antérieur)

#### Monothérapie

VELCADE 1 mg poudre pour solution injectable est administré par injection intraveineuse à la posologie recommandée de 1,3 mg/m<sup>2</sup> de surface corporelle deux fois par semaine pendant deux semaines les jours 1, 4, 8 et 11 d'un cycle de traitement de 21 jours. Cette période de 3 semaines est considérée comme un cycle de traitement. Il est recommandé que les patients reçoivent 2 cycles de

VELCADE après confirmation de la réponse complète. Il est également recommandé que les patients répondent mais n'obtenant pas une rémission complète reçoivent un total de 8 cycles de traitement par VELCADE. Au moins 72 heures doivent s'écouler entre deux doses consécutives de VELCADE.

#### Ajustement de la posologie au cours d'un traitement et d'une réinitiation d'un traitement en monothérapie

Le traitement par VELCADE doit être interrompu en cas d'apparition de toute toxicité non hématologique de Grade 3 ou de toute toxicité hématologique de Grade 4, à l'exception des neuropathies discutées ci-après (voir également rubrique 4.4). Après disparition des symptômes liés à la toxicité, le traitement par VELCADE peut être réinitié à une dose réduite de 25 % (1,3 mg/m<sup>2</sup> réduit à 1,0 mg/m<sup>2</sup> ; 1,0 mg/m<sup>2</sup> réduit à 0,7 mg/m<sup>2</sup>). En cas de persistance ou de récurrence de la toxicité à la dose inférieure, l'arrêt de VELCADE doit être envisagé, sauf si les bénéfices du traitement l'emportent nettement sur les risques.

#### Douleur neuropathique et/ou neuropathie périphérique

Les patients qui présentent une douleur neuropathique et/ou une neuropathie périphérique liée au bortézomib doivent être pris en charge selon le Tableau 1 (voir rubrique 4.4). Les patients présentant une neuropathie sévère préexistante peuvent être traités par VELCADE uniquement après une évaluation soigneuse du rapport risque/bénéfice.

Tableau 1 : Modifications recommandées\* de la posologie en cas de neuropathie liée au bortézomib

| Sevérité de la neuropathie                                                                                                       | Modification de la posologie                                                                                                                                                           |
|----------------------------------------------------------------------------------------------------------------------------------|----------------------------------------------------------------------------------------------------------------------------------------------------------------------------------------|
| Grade 1 (asymptomatique, perte des réflexes ostéotendineux ou paresthésie) sans douleur ou sans perte de fonction                | Aucune                                                                                                                                                                                 |
| Grade 1 avec douleur ou Grade 2 (symptômes modérés; limitant les activités instrumentales de la vie quotidienne (Echelle ADL)**) | Réduire VELCADE à 1,0 mg/m <sup>2</sup> ou<br>Modifier le rythme d'administration de VELCADE à 1,3 mg/m <sup>2</sup> une fois par semaine                                              |
| Grade 2 avec douleur ou Grade 3 (symptômes sévères; limitant l'autonomie selon l'échelle ADL***)                                 | Interrompre le traitement par VELCADE jusqu'à disparition des symptômes. Ré-instaurer alors le traitement par VELCADE et réduire la dose à 0,7 mg/m <sup>2</sup> une fois par semaine. |
| Grade 4 (conséquences sur le pronostic vital; intervention urgente indiquée) et/ou neuropathie autonome sévère                   | Arrêter VELCADE                                                                                                                                                                        |

\* Sur la base des modifications de posologie lors des études de Phase II et III dans le myélome multiple et de l'expérience après commercialisation. La gradation se base sur la version 4.0 de la classification « NCI Common Toxicity Criteria CTCvE ».

\*\* Echelle instrumentale ADL fait référence à la préparation des repas, l'achat des courses alimentaires ou des vêtements, l'utilisation du téléphone, la gestion de son argent, etc.

\*\*\* Echelle d'autonomie ADL fait référence à la toilette, l'habillage et le déshabillage, se nourrir de façon autonome, l'utilisation des toilettes, la prise de ses médicaments et ne pas être alité.

#### Traitement en association à la doxorubicine liposomale pégylée

VELCADE 1 mg poudre pour solution injectable est administré par injection intraveineuse à la posologie recommandée de 1,3 mg/m<sup>2</sup> de surface corporelle deux fois par semaine pendant deux semaines les jours 1, 4, 8 et 11 d'un cycle de traitement de 21 jours. Cette période de 3 semaines est considérée comme un cycle de traitement. Au moins 72 heures doivent s'écouler entre deux doses consécutives de VELCADE.

La doxorubicine liposomale pégylée est administrée à la dose de 30 mg/m<sup>2</sup> au jour 4 du cycle de traitement par VELCADE, en perfusion intraveineuse d'1 heure, après l'injection de VELCADE. Jusqu'à 8 cycles de cette association médicamenteuse peuvent être administrés tant que le patient tolère le traitement et que sa maladie n'a pas progressé. Les patients ayant obtenu une réponse complète peuvent poursuivre le traitement pendant au moins 2 cycles après les premiers signes de réponse complète, même si cela implique un traitement de plus de 8 cycles. Les patients dont le taux de paraprotéine continue à diminuer après 8 cycles peuvent également poursuivre le traitement aussi longtemps qu'il est toléré et qu'ils continuent à y répondre.



-Adaptation posologique pendant le traitement et lors de la reprise du traitement pour le traitement en association avec melphalan et prednisone

Avant d'initier un nouveau cycle de traitement:

- Le taux de plaquettes doit être  $\geq 70 \times 10^9/l$  et le taux de polynucléaires neutrophiles doit être  $\geq 1.0 \times 10^9/l$
- Les toxicités non-hématologiques doivent être réduites au Grade 1 ou à l'état initial

Tableau 3: Modifications de la posologie au cours des cycles suivants de traitement par VELCADE en association au melphalan et à la prednisone

| Toxicité                                                                                                                                                                                                                                                                                                                                                                                                                                                                                                                                                                                                                                                     | Modification ou report de dose                                                                                                                                                                                                                                                                                                                                                                                                                                              |
|--------------------------------------------------------------------------------------------------------------------------------------------------------------------------------------------------------------------------------------------------------------------------------------------------------------------------------------------------------------------------------------------------------------------------------------------------------------------------------------------------------------------------------------------------------------------------------------------------------------------------------------------------------------|-----------------------------------------------------------------------------------------------------------------------------------------------------------------------------------------------------------------------------------------------------------------------------------------------------------------------------------------------------------------------------------------------------------------------------------------------------------------------------|
| <b>Toxicité hématologique au cours d'un cycle:</b>                                                                                                                                                                                                                                                                                                                                                                                                                                                                                                                                                                                                           |                                                                                                                                                                                                                                                                                                                                                                                                                                                                             |
| <ul style="list-style-type: none"> <li>En cas de neutropénie ou de thrombopénie prolongée de Grade 4, ou de thrombopénie avec saignement, observée au cours du cycle précédent</li> <li>Si, le jour de l'administration de VELCADE (autre que le jour 1), le taux de plaquettes est <math>\leq 30 \times 10^9/l</math> ou le taux de polynucléaires neutrophiles est <math>\leq 0.75 \times 10^9/l</math></li> <li>Si plusieurs doses de VELCADE ne sont pas administrées lors d'un cycle (<math>\geq 3</math> doses au cours d'une administration deux fois par semaine ou <math>\geq 2</math> doses au cours d'une administration hebdomadaire)</li> </ul> | Le traitement par VELCADE doit être interrompu                                                                                                                                                                                                                                                                                                                                                                                                                              |
| <ul style="list-style-type: none"> <li>Si plusieurs doses de VELCADE ne sont pas administrées lors d'un cycle (<math>\geq 3</math> doses au cours d'une administration deux fois par semaine ou <math>\geq 2</math> doses au cours d'une administration hebdomadaire)</li> </ul>                                                                                                                                                                                                                                                                                                                                                                             | La dose de VELCADE sera réduite d'un niveau (de $1.3 \text{ mg/m}^2$ à $1 \text{ mg/m}^2$ , ou de $1 \text{ mg/m}^2$ à $0.7 \text{ mg/m}^2$ )                                                                                                                                                                                                                                                                                                                               |
| <b>Toxicité non-hématologique de Grade <math>\geq 3</math></b>                                                                                                                                                                                                                                                                                                                                                                                                                                                                                                                                                                                               |                                                                                                                                                                                                                                                                                                                                                                                                                                                                             |
|                                                                                                                                                                                                                                                                                                                                                                                                                                                                                                                                                                                                                                                              | Le traitement par VELCADE doit être interrompu jusqu'à la réduction des symptômes de la toxicité au Grade 1 ou à l'état initial. VELCADE peut être ensuite ré-institué à une dose réduite d'un niveau (de $1.3 \text{ mg/m}^2$ à $1 \text{ mg/m}^2$ , ou de $1 \text{ mg/m}^2$ à $0.7 \text{ mg/m}^2$ ). Pour des douleurs neuropathiques et/ou une neuropathie périphérique liées à VELCADE, suspendre et/ou modifier la dose de VELCADE tel que décrit dans le Tableau 1. |

Pour des informations supplémentaires concernant le melphalan et la prednisone, voir les Résumés des Caractéristiques du Produit correspondants.

Posologie pour les patients atteints de myélome multiple non traité au préalable, éligibles à la greffe de cellules souches hématopoïétiques (traitement d'induction)

Traitement en association à la dexaméthasone

VELCADE 1 mg poudre pour solution injectable est administré par injection intraveineuse à la posologie recommandée de  $1.3 \text{ mg/m}^2$  de surface corporelle deux fois par semaine pendant deux semaines les jours 1, 4, 8 et 11 d'un cycle de traitement de 21 jours. Cette période de 3 semaines est considérée comme un cycle de traitement. Au moins 72 heures doivent s'écouler entre deux doses consécutives de VELCADE.

La dexaméthasone est administrée par voie orale à la dose de 40 mg les jours 1, 2, 3, 4, 8, 9, 10 et 11 du cycle de traitement par VELCADE.

Quatre cycles de traitement par cette association médicamenteuse sont administrés.

Traitement en association à la dexaméthasone et au thalidomide

VELCADE 1 mg poudre pour solution injectable est administré par injection intraveineuse à la posologie recommandée de  $1.3 \text{ mg/m}^2$  de surface corporelle deux fois par semaine pendant deux semaines les jours 1, 4, 8 et 11 d'un cycle de traitement de 28 jours. Cette période de 4 semaines est considérée comme un cycle de traitement. Au moins 72 heures doivent s'écouler entre deux doses consécutives de VELCADE.

Pour des informations complémentaires concernant la doxorubicine liposomale pégylée, veuillez-vous référer à son Résumé des Caractéristiques du Produit.

Traitement en association à la dexaméthasone

VELCADE 1 mg poudre pour solution injectable est administré par injection intraveineuse à la posologie recommandée de  $1.3 \text{ mg/m}^2$  de surface corporelle deux fois par semaine pendant deux semaines les jours 1, 4, 8 et 11 d'un cycle de traitement de 21 jours. Cette période de 3 semaines est considérée comme un cycle de traitement. Au moins 72 heures doivent s'écouler entre deux doses consécutives de VELCADE.

La dexaméthasone est administrée par voie orale à la dose de 20 mg les jours 1, 2, 4, 5, 8, 9, 11 et 12 du cycle de traitement par VELCADE.

Les patients ayant obtenu une réponse ou une stabilisation de leur maladie après 4 cycles de cette association médicamenteuse peuvent continuer à recevoir la même association pour un maximum de 4 cycles supplémentaires.

Pour des informations complémentaires concernant la dexaméthasone, veuillez-vous référer à son Résumé des Caractéristiques du Produit.

Adaptation posologique pour le traitement en association chez les patients atteints de myélome multiple en progression

Pour les adaptations posologiques de VELCADE au cours d'un traitement en association, suivre les recommandations de modification de dose décrites ci-dessus pour le traitement en monothérapie.

Posologie pour les patients atteints de myélome multiple non traité au préalable, non éligibles à la greffe de cellules souches hématopoïétiques

Traitement en association au melphalan et à la prednisone

VELCADE 1 mg poudre pour solution injectable est administré par injection intraveineuse en association au melphalan par voie orale et à la prednisone par voie orale, tel que décrit dans le Tableau 2. Une période de 6 semaines est considérée comme un cycle de traitement. Au cours des cycles 1 à 4, VELCADE est administré deux fois par semaine les jours 1, 4, 8, 11, 22, 25, 29 et 32. Au cours des cycles 5 à 9, VELCADE est administré une fois par semaine les jours 1, 8, 22 et 29. Au moins 72 heures doivent s'écouler entre deux doses consécutives de VELCADE.

Le melphalan et la prednisone doivent être administrés par voie orale les jours 1, 2, 3 et 4 de la première semaine de chaque cycle de traitement par VELCADE. Neuf cycles de traitement par cette association médicamenteuse sont administrés.

Tableau 2: Schéma posologique recommandé de VELCADE en association au melphalan et à la prednisone

| Semaine                                             | VELCADE deux fois par semaine (Cycles 1-4) |        |                         |         |         |                         |
|-----------------------------------------------------|--------------------------------------------|--------|-------------------------|---------|---------|-------------------------|
|                                                     | 1                                          | 2      | 3                       | 4       | 5       | 6                       |
| Vc ( $1.3 \text{ mg/m}^2$ )                         | J1 -- -- J4                                | J8 J11 | Période sans traitement | J22 J25 | J29 J32 | Période sans traitement |
| M( $9 \text{ mg/m}^2$ )<br>P( $60 \text{ mg/m}^2$ ) | J1 J2 J3 J4                                | -- --  | Période sans traitement | -- --   | -- --   | Période sans traitement |
| Semaine                                             | VELCADE une fois par semaine (Cycles 5-9)  |        |                         |         |         |                         |
| Vc ( $1.3 \text{ mg/m}^2$ )                         | J1 -- --                                   | J8     | Période sans traitement | J22     | J29     | Période sans traitement |
| M( $9 \text{ mg/m}^2$ )<br>P( $60 \text{ mg/m}^2$ ) | J1 J2 J3 J4                                | --     | Période sans traitement | --      | --      | Période sans traitement |

Vc = VELCADE, M = melphalan, P = prednisone

La dexaméthasone est administrée par voie orale à la dose de 40 mg les jours 1, 2, 3, 4, 8, 9, 10 et 11 du cycle de traitement par VELCADE.

Le thalidomide est administré par voie orale à la dose quotidienne de 50 mg les jours 1 à 14 et s'il est bien toléré la dose est augmentée à 100 mg les jours 15 à 28, puis elle peut être ensuite de nouveau augmentée à 200 mg par jour à partir du cycle 2 (voir Tableau 4).

Quatre cycles de traitement par cette association médicamenteuse sont administrés. Il est recommandé que les patients ayant au moins une réponse partielle reçoivent 2 cycles supplémentaires.

Tableau 4: Posologie du traitement en association avec VELCADE pour les patients atteints d'un myélome multiple non traité au préalable, éligibles à la greffe de cellules souches hématopoïétiques

| Vc+Dx+T                         | Cycles 1 à 4    |                   |                         |                         |   |                         |
|---------------------------------|-----------------|-------------------|-------------------------|-------------------------|---|-------------------------|
|                                 | Semaine         | 1                 | 2                       | 3                       | 4 | Période sans traitement |
| Vc (1,3 mg/m <sup>2</sup> )     | Jour 1, 4       | Jour 8, 11        |                         |                         |   |                         |
| Dx 40 mg                        | Jour 1, 2, 3, 4 | Jour 8, 9, 10, 11 |                         |                         |   |                         |
| <b>Cycle 1</b>                  |                 |                   |                         |                         |   |                         |
| Semaine                         | 1               | 2                 | 3                       | 4                       |   |                         |
| Vc (1,3 mg/m <sup>2</sup> )     | Jour 1, 4       | Jour 8, 11        | Période sans traitement | Période sans traitement |   |                         |
| T 50 mg                         | Quotidiennement | Quotidiennement   | -                       | -                       |   |                         |
| T 100 mg <sup>a</sup>           | -               | -                 | Quotidiennement         | Quotidiennement         |   |                         |
| Dx 40 mg                        | Jour 1, 2, 3, 4 | Jour 8, 9, 10, 11 | -                       | -                       |   |                         |
| <b>Cycles 2 à 4<sup>b</sup></b> |                 |                   |                         |                         |   |                         |
| Vc (1,3 mg/m <sup>2</sup> )     | Jour 1, 4       | Jour 8, 11        | Période sans traitement | Période sans traitement |   |                         |
| T 200 mg <sup>a</sup>           | Quotidiennement | Quotidiennement   | Quotidiennement         | Quotidiennement         |   |                         |
| Dx 40 mg                        | Jour 1, 2, 3, 4 | Jour 8, 9, 10, 11 | -                       | -                       |   |                         |

Vc = VELCADE; Dx = dexaméthasone; T = thalidomide

<sup>a</sup> La dose de thalidomide est augmentée à 100 mg à partir de la semaine 3 du cycle 1 seulement si la dose de 50 mg est tolérée, puis à 200 mg à partir du cycle 2 si la dose de 100 mg est tolérée.

<sup>b</sup> Jusqu'à 6 cycles peuvent être administrés aux patients ayant obtenus au moins une réponse partielle après 4 cycles.

#### Adaptation posologique chez les patients éligibles à la greffe

Pour les adaptations posologiques de VELCADE, les recommandations de modification de dose décrites pour le traitement en monothérapie doivent être suivies.

En outre, lorsque VELCADE est administré en association à d'autres médicaments chimiothérapeutiques, des diminutions posologiques appropriées pour ces produits doivent être envisagées en cas de toxicités, conformément aux recommandations du Résumé des Caractéristiques du Produit.

Posologie pour les patients atteints d'un lymphome à cellules du manteau non traité au préalable (LLCM)

Le traitement en association au rituximab, cyclophosphamide, doxorubicine et prednisone (VcR-CAP) VELCADE 1 mg poudre pour solution injectable est administré par injection intraveineuse à la posologie recommandée de 1,3 mg/m<sup>2</sup> de surface corporelle deux fois par semaine pendant deux semaines les jours 1, 4, 8 et 11, suivie d'une période d'arrêt de 10 jours les jours 12 à 21. Cette période de 3 semaines est considérée comme un cycle de traitement. Six cycles de traitement par VELCADE sont recommandés, bien que pour les patients ayant une première réponse documentée au cycle 6, deux cycles supplémentaires de VELCADE peuvent être administrés. Au moins 72 heures doivent s'écouler entre deux doses consécutives de VELCADE.

Les médicaments suivants sont administrés en perfusion intraveineuse au jour 1 de chaque cycle de traitement par VELCADE de 3 semaines: rituximab à la dose de 375 mg/m<sup>2</sup>, cyclophosphamide à la dose de 750 mg/m<sup>2</sup> et doxorubicine à la dose de 50 mg/m<sup>2</sup>. La prednisone est administrée par voie orale à la dose de 100 mg/m<sup>2</sup> les jours 1, 2, 3, 4 et 5 de chaque cycle de traitement par VELCADE.

Adaptation posologique pendant le traitement chez les patients atteints d'un lymphome à cellules du manteau non traité au préalable

Avant d'initier un nouveau cycle de traitement :

- Le taux de plaquettes doit être  $\geq 100\ 000$  cellules/ $\mu$ l et le taux de polynucléaires neutrophiles doit être  $\geq 1\ 500$  cellules/ $\mu$ l
- Le taux de plaquettes doit être  $\geq 75\ 000$  cellules/ $\mu$ l chez les patients avec une infiltration de la moelle osseuse ou une séquestration splénique
- Le taux d'hémoglobine doit être  $\geq 8$  g/dl
- Les toxicités non-hématologiques doivent être réduites au Grade 1 ou à l'état initial.

Le traitement par VELCADE doit être interrompu en cas d'apparition de toute toxicité non hématologique de Grade  $\geq 3$  liée à VELCADE (à l'exception des neuropathies) ou de toute toxicité hématologique de Grade  $\geq 3$  (voir également rubrique 4.4). Pour les adaptations posologiques, se référer au Tableau 5 ci-dessous.

Des facteurs de croissance granulocytaires peuvent être administrés pour les toxicités hématologiques conformément aux standards de pratique locale. L'utilisation prophylactique de facteurs de croissance granulocytaires doit être envisagée en cas de retard répétés dans l'administration des cycles. Une transfusion de plaquettes pour le traitement d'une thrombopénie doit être envisagée lorsqu'elle est cliniquement appropriée.

Tableau 5 : Adaptation posologique pendant le traitement chez les patients atteints d'un lymphome à cellules du manteau non traité au préalable

| Toxicité                                                                                                                                                                                                    | Modification de la posologie ou report de dose                                                                                                                                                                                                                                                                                                                                                                                                                                                                                                                                                                                                                                                                                                                                                                             |
|-------------------------------------------------------------------------------------------------------------------------------------------------------------------------------------------------------------|----------------------------------------------------------------------------------------------------------------------------------------------------------------------------------------------------------------------------------------------------------------------------------------------------------------------------------------------------------------------------------------------------------------------------------------------------------------------------------------------------------------------------------------------------------------------------------------------------------------------------------------------------------------------------------------------------------------------------------------------------------------------------------------------------------------------------|
| <b>Toxicité hématologique</b>                                                                                                                                                                               |                                                                                                                                                                                                                                                                                                                                                                                                                                                                                                                                                                                                                                                                                                                                                                                                                            |
| • Neutropénie de Grade $\geq 3$ accompagnée de fièvre, neutropénie de Grade 4 durant plus de 7 jours, taux de plaquettes $< 10\ 000$ cellules/ $\mu$ l                                                      | Le traitement par VELCADE doit être interrompu jusqu'à 2 semaines jusqu'à ce que le patient ait un taux de polynucléaires neutrophiles $\geq 750$ cellules/ $\mu$ l et un taux de plaquettes $\geq 25\ 000$ cellules/ $\mu$ l.<br><ul style="list-style-type: none"> <li>• Si, après que VELCADE ait été interrompu, la toxicité n'a pas disparu, comme définie ci-dessus, alors VELCADE doit être arrêté.</li> <li>• Si la toxicité disparaît, c'est-à-dire si le patient a un taux de polynucléaires neutrophiles <math>\geq 750</math> cellules/<math>\mu</math>l et un taux de plaquettes <math>\geq 25\ 000</math> cellules/<math>\mu</math>l, VELCADE peut être ré-instaure à une dose réduite d'un niveau (de 1,3 mg/m<sup>2</sup> à 1 mg/m<sup>2</sup> ou de 1 mg/m<sup>2</sup> à 0,7 mg/m<sup>2</sup>)</li> </ul> |
| • Si le jour de l'administration de VELCADE (autre que le jour 1 du cycle), le taux de plaquettes est $< 25\ 000$ cellules/ $\mu$ l ou le taux de polynucléaires neutrophiles est $< 750$ cellules/ $\mu$ l | Le traitement par VELCADE doit être interrompu.                                                                                                                                                                                                                                                                                                                                                                                                                                                                                                                                                                                                                                                                                                                                                                            |
| <b>Toxicités non hématologiques de Grade <math>\geq 3</math> considérées comme étant liées à VELCADE</b>                                                                                                    | Le traitement par VELCADE doit être interrompu jusqu'à la réduction des symptômes de la toxicité au Grade 2 ou moins. VELCADE peut être ensuite ré-instaure à une dose réduite d'un niveau (de 1,3 mg/m <sup>2</sup> à 1 mg/m <sup>2</sup> ou de 1 mg/m <sup>2</sup> à 0,7 mg/m <sup>2</sup> ). Pour les douleurs neuropathiques et/ou neuropathies périphériques liées à VELCADE, interrompre et/ou modifier la dose de VELCADE tel que décrit dans le Tableau 1.                                                                                                                                                                                                                                                                                                                                                         |

En outre, lorsque VELCADE est administré en association à d'autres médicaments chimiothérapeutiques, des diminutions posologiques appropriées pour ces produits doivent être envisagées en cas de toxicités, conformément aux recommandations de leur Résumé des Caractéristiques du Produit respectif.

#### Populations particulières

##### Sujets âgés

Il n'existe aucun élément suggérant que des adaptations de posologie soient nécessaires chez les patients âgés de plus de 65 ans atteints d'un myélome multiple ou d'un lymphome à cellules du manteau. Il n'existe aucune étude sur l'utilisation de VELCADE chez les patients âgés atteints de myélome multiple non traité au préalable, éligibles à la chimiothérapie intensive accompagnée d'une greffe de cellules souches hématopoïétiques. Par conséquent, aucune recommandation posologique ne peut être faite dans cette population. Dans une étude conduite chez des patients atteints d'un lymphome à cellules du manteau non traité au préalable, 42,9 % et 10,4 % des patients exposés à VELCADE avaient entre 65-74 ans et  $\geq 75$  ans, respectivement. Chez les patients âgés de  $\geq 75$  ans, les deux protocoles de traitement, VcR-CAP ainsi que R-CHOP, ont été moins bien tolérés (voir rubrique 4.8).

##### Insuffisance hépatique

Les patients présentant une insuffisance hépatique légère ne nécessitent pas d'adaptation posologique et doivent être traités à la dose recommandée. Les patients présentant une insuffisance hépatique modérée ou sévère doivent commencer VELCADE à une dose réduite de 0,7 mg/m<sup>2</sup> par injection pendant le premier cycle de traitement et une augmentation de la dose suivante à 1,0 mg/m<sup>2</sup> ou une diminution supplémentaire à 0,5 mg/m<sup>2</sup> pourront être envisagées en fonction de la tolérance du patient (voir Tableau 6 et rubriques 4.4 et 5.2).

Tableau 6: Modifications recommandées des doses initiales de VELCADE chez les patients présentant une insuffisance hépatique

| Grade de l'insuffisance hépatique* | Taux de bilirubine                | Taux de SGOT (ASAT) | Modification de la dose initiale                                                                                                                                                                  |
|------------------------------------|-----------------------------------|---------------------|---------------------------------------------------------------------------------------------------------------------------------------------------------------------------------------------------|
| Légère                             | $\leq 1,0 \times$ LSN             | > LSN               | Aucune                                                                                                                                                                                            |
|                                    | $> 1,0 \times$ - $1,5 \times$ LSN | Indifférent         | Aucune                                                                                                                                                                                            |
| Modérée                            | $> 1,5 \times$ - $3 \times$ LSN   | Indifférent         | Réduire VELCADE à 0,7 mg/m <sup>2</sup> pendant le premier cycle de traitement.                                                                                                                   |
| Sévère                             | $> 3 \times$ LSN                  | Indifférent         | Envisager une augmentation de la dose à 1,0 mg/m <sup>2</sup> ou une réduction supplémentaire de dose à 0,5 mg/m <sup>2</sup> pour les cycles ultérieurs, en fonction de la tolérance du patient. |

Abréviations: SGOT = transaminase glutamique oxaloacétique sérique

\* ASAT = Aspartate aminotransférase sérique; LSN = Limite supérieure de la normale

Basées sur la classification du groupe de travail du dysfonctionnement d'organe NCI pour la catégorisation de l'insuffisance hépatique (légère, modérée, sévère).

##### Insuffisance rénale

La pharmacocinétique du bortézomib n'est pas influencée chez les patients présentant une insuffisance rénale légère à modérée (clearance de la créatinine [CLCr]  $> 20$  ml/min/1,73 m<sup>2</sup>); par conséquent, des adaptations de dose ne sont pas nécessaires chez ces patients. L'impact sur les caractéristiques pharmacocinétiques du bortézomib chez les patients insuffisants rénaux sévères ne nécessitent pas de dialyse (CLCr  $< 20$  ml/min/1,73 m<sup>2</sup>) n'est pas connu. La dialyse pouvant réduire les concentrations de bortézomib, VELCADE doit être administré après la dialyse (voir rubrique 5.2).

#### Population pédiatrique

La sécurité et l'efficacité de VELCADE chez les enfants âgés de moins de 18 ans n'ont pas été établies (voir rubriques 5.1 et 5.2). Les données disponibles à ce jour sont décrites dans la rubrique 5.1 mais aucune recommandation relative à la posologie ne peut être faite.

#### Mode d'administration

VELCADE 1 mg poudre pour solution injectable est réservé à l'administration intraveineuse uniquement.

VELCADE 3,5 mg poudre pour solution injectable est disponible pour une administration intraveineuse ou sous-cutanée.

VELCADE ne doit pas être administré par d'autres voies. L'administration intrathécale a provoqué des décès.

#### Injection intraveineuse

VELCADE 1 mg poudre pour solution injectable est réservé à l'administration intraveineuse uniquement. La solution reconstituée est administrée par injection intraveineuse en bolus de 3 à 5 secondes dans un cathétre intraveineux périphérique ou central, suivie par un rinçage avec une solution de chlorure de sodium injectable à 9 mg/ml (0,9 %). Au moins 72 heures doivent s'écouler entre deux doses consécutives de VELCADE.

Si VELCADE est administré en association à d'autres médicaments, se référer au Résumé des Caractéristiques du Produit de ces produits pour les modalités d'administration.

#### 4.3 Contre-indications

Hypersensibilité au principe actif, au bore ou à l'un des excipients mentionnés à la rubrique 6.1. Pneuonopathie infiltrative diffuse aiguë et atteinte péricardique.

Lorsque VELCADE est administré en association à d'autres médicaments, se référer aux Résumés des Caractéristiques du Produit de ces médicaments pour les contre-indications supplémentaires.

#### 4.4 Mises en garde spéciales et précautions d'emploi

Lorsque VELCADE est administré en association à d'autres médicaments, le Résumé des Caractéristiques du Produit de ces autres médicaments doit être consulté avant l'instauration du traitement par VELCADE. Lorsque thalidomide est utilisé, une attention particulière est nécessaire concernant les obligations liées aux tests de grossesse et aux mesures de prévention des grossesses (voir rubrique 4.6).

##### Administration intrathécale

Des cas mortels ont été rapportés suite à l'administration accidentelle de VELCADE par voie intrathécale. VELCADE 1 mg poudre pour solution injectable doit être utilisé par voie intraveineuse uniquement, alors que VELCADE 3,5 mg poudre pour solution injectable peut être utilisé par voie intraveineuse ou sous-cutanée. VELCADE ne doit pas être administré par voie intrathécale.

##### Toxicité gastro-intestinale

Une toxicité gastro-intestinale, telle que nausées, diarrhées, vomissements et constipation, est très fréquente pendant le traitement par VELCADE. Des cas d'iléus paralytique ont été peu fréquemment rapportés (voir rubrique 4.8). En conséquence, les patients présentant une constipation doivent être étroitement surveillés.

##### Toxicité hématologique

Le traitement par VELCADE est très fréquemment associé à des toxicités hématologiques (thrombopénie, neutropénie et anémie). Dans les études conduites chez des patients atteints d'un myélome multiple en rechute traités par VELCADE et chez des patients atteints d'un LCM non traité

au préalable et ayant reçu VELCADE en association au rituximab, cyclophosphamide, doxorubicine et prédisone (VcR-CAP), une des toxicités hématologiques les plus fréquentes était la thrombopénie transitoire. Le taux de plaquettes était au plus bas au jour 11 de chaque cycle de traitement par VELCADE et est habituellement revenu à son taux initial au cycle suivant. Il n'y avait pas de preuve de thrombopénie cumulative. La moyenne des nadirs des taux de plaquettes mesurés était d'approximativement 40 % la valeur initiale dans les études conduites dans le myélome multiple traité en monothérapie et 50 % la valeur initiale dans l'étude conduite dans le LCM. Chez les patients atteints de myélome à un stade avancé, la sévérité de la thrombopénie était liée au taux de plaquettes avant traitement, pour un taux de plaquettes initial < 75 000/ $\mu$ l, 90 % des 21 patients avaient un taux  $\leq$  25 000/ $\mu$ l au cours de l'étude, dont 14 % un taux < 10 000/ $\mu$ l; à l'opposé, avec un taux de plaquettes initial > 75 000/ $\mu$ l, seulement 14 % des 309 patients avaient un taux  $\leq$  25 000/ $\mu$ l au cours de l'étude. Chez les patients ayant un LCM (étude LYM-3002), la fréquence des thrombopénies de Grade  $\geq$  3 était plus grande (56,7 % versus 5,8 %) dans le bras traité par VELCADE (VcR-CAP) comparée au bras non traité par VELCADE (rituximab, cyclophosphamide, doxorubicine, vincristine et prédisone [R-CHOP]). Les deux bras de traitement étaient similaires concernant la fréquence globale des saignements de tout grade (6,3 % dans le bras VcR-CAP et 5,0 % dans le bras R-CHOP) et des saignements de grade 3 ou plus (VcR-CAP : 4 patients [1,7 %]; R-CHOP : 3 patients [1,2 %]). Dans le bras traité par VcR-CAP, 22,5 % des patients ont reçu des transfusions de plaquettes comparé à 2,9 % des patients dans le bras R-CHOP.

Des hémorragies gastro-intestinales et intracérébrales ont été rapportées avec le traitement par VELCADE. En conséquence, avant chaque administration de VELCADE, le taux de plaquettes devra être surveillé. Le traitement par VELCADE devra être interrompu lorsque le taux de plaquettes est < 25 000/ $\mu$ l, ou, dans le cas d'une association à la prédisone et au melphalan, lorsque le taux de plaquettes est  $\leq$  30 000/ $\mu$ l (voir rubrique 4.2). Le bénéfice potentiel du traitement doit être soigneusement pesé par rapport aux risques, particulièrement en cas de thrombopénie modérée à sévère et de facteurs de risque de saignement.

Les numérations de la formule sanguine (NFS), incluant une numération plaquettaire, doivent être fréquemment contrôlées pendant le traitement par VELCADE. La transfusion de plaquettes doit être envisagée lorsqu'elle est cliniquement appropriée (voir rubrique 4.2).

Chez les patients atteints d'un LCM, une neutropénie transitoire, réversible entre les cycles, a été observée, sans preuve de neutropénie cumulative. Les neutrophiles étaient au plus bas au jour 11 de chaque cycle de traitement par VELCADE et sont habituellement revenus à leur valeur initiale au cycle suivant. Dans l'étude LYM-3002, des facteurs de croissance ont été administrés à 78 % des patients du bras VcR-CAP et 61 % des patients du bras R-CHOP. Les patients avec une neutropénie ayant un risque augmenté d'infections, ces derniers doivent être surveillés afin de déceler tout signe et symptôme d'infection et être traités sans délai. Des facteurs de croissance granulocytaires peuvent être administrés pour une toxicité hématologique conformément aux standards de pratique locale. L'utilisation prophylactique de facteurs de croissance granulocytaires doit être envisagée en cas de retard répété dans l'administration des cycles (voir rubrique 4.2).

#### Réactivation du zona

Une prophylaxie antivirale est recommandée chez les patients traités par VELCADE. Dans l'étude de phase III conduite chez des patients atteints d'un myélome multiple non traité au préalable, la fréquence globale de réactivation du zona était plus importante chez les patients traités par VELCADE+Melphalan+Prednisone que chez les patients traités par Melphalan+Prednisone (1,4 % versus 4 % respectivement).

Chez les patients atteints d'un LCM (étude LYM-3002), la fréquence d'infection par le zona était de 6,7 % dans le bras VcR-CAP et de 1,2 % dans le bras R-CHOP (voir rubrique 4.8).

#### Réactivation et infection par le virus de l'hépatite B (VHB)

Lorsque le rituximab est utilisé en association à VELCADE, un dépistage du VHB doit toujours être réalisé avant l'initiation du traitement chez les patients à risque d'infection par le VHB. Les patients porteurs de l'hépatite B et les patients ayant un antécédent d'hépatite B doivent être étroitement

surveillés pour déceler tout signe clinique et biologique d'une infection active par le VHB pendant et après le traitement par rituximab associé à VELCADE. Une prophylaxie antivirale doit être envisagée. Se référer au Résumé des Caractéristiques du Produit du rituximab pour plus d'information.

#### Leucoencéphalopathie multifocale progressive (LEMP)

De très rares cas d'infection par le virus de John Cunningham (JC) sans lien de causalité connu, ayant entraîné une LEMP et le décès, ont été rapportés chez les patients traités par VELCADE. Les patients diagnostiqués avec une LEMP avaient un traitement immunosuppresseur antérieur ou concomitant. La plupart des cas de LEMP ont été diagnostiqués dans les 12 mois suivant la première dose de VELCADE. Les patients doivent être surveillés à intervalles réguliers afin de détecter l'apparition ou l'aggravation de tout symptôme ou signe neurologique évocateur d'une LEMP dans le cadre d'un diagnostic différentiel des troubles du SNC. Si le diagnostic d'une LEMP est suspecté, les patients doivent être orientés vers un spécialiste des LEMP et des mesures de diagnostic appropriées doivent être initiées. Arrêter VELCADE si une LEMP est diagnostiquée.

#### Neuropathies périphériques

Le traitement par VELCADE est très fréquemment associé à des neuropathies périphériques, principalement sensitives. Cependant des cas de neuropathie motrice sévère associée ou non à une neuropathie périphérique sensitive ont été rapportés. La fréquence des neuropathies périphériques augmente dès le début du traitement et atteint un pic au cours du cycle 5.

Les symptômes de neuropathie, tels que sensation de brûlure, hyperesthésie, hypoesthésie, paresthésie, gêne, douleur ou faiblesse neuropathiques doivent faire l'objet d'une surveillance particulière.

Les patients présentant une neuropathie périphérique nouvelle ou aggravée doivent bénéficier d'une évaluation neurologique et peuvent nécessiter une modification de la posologie ou du schéma thérapeutique de VELCADE (voir rubrique 4.2). Les neuropathies ont été prises en charge à l'aide de traitements symptomatiques et d'autres thérapies.

Une surveillance précoce et régulière des symptômes de neuropathies apparues sous traitement avec une évaluation neurologique doivent être envisagées chez les patients recevant VELCADE avec d'autres médicaments connus pour être associés à des neuropathies (par exemple, thalidomide) et une diminution posologique appropriée ou un arrêt de traitement doit être envisagé.

Outre les neuropathies périphériques, les atteintes du système nerveux autonome peuvent contribuer à des effets indésirables comme l'hypotension orthostatique et la constipation sévère avec iléus paralytique. Les informations disponibles sur les atteintes du système nerveux autonome et leur rôle dans ces effets indésirables sont limitées.

#### Crises convulsives

Des crises convulsives ont été peu fréquemment rapportées chez des patients sans antécédents de convulsions ou d'épilepsie. Une attention particulière est nécessaire au cours du traitement pour les patients présentant des facteurs de risque de convulsions.

#### Hypotension

Le traitement par VELCADE est fréquemment associé à une hypotension orthostatique/posturale. La plupart de ces effets indésirables sont de sévérité légère à modérée, et sont observés à tout moment au cours du traitement. Les patients qui ont développé une hypotension orthostatique sous VELCADE (injecté par voie intraveineuse) ne présenteraient pas de signes d'hypotension orthostatique avant le traitement par VELCADE. Un traitement de l'hypotension orthostatique a été instauré chez la plupart des patients. Une minorité de patients ayant une hypotension orthostatique ont présenté des syncopes. L'hypotension orthostatique/posturale n'était pas liée à l'injection en bolus de VELCADE. Le mécanisme de cet effet est inconnu, bien qu'une composante puisse être due à une atteinte du système nerveux autonome. L'atteinte du système nerveux autonome peut être liée au borézomib ou le borézomib peut aggraver une affection sous-jacente telle qu'une neuropathie diabétique ou amyloïde. La prudence est conseillée lors du traitement des patients présentant des antécédents de syncopes au cours d'un traitement par des médicaments connus pour être associés à une hypotension ou qui sont

déshydratés à cause de diarrhées ou de vomissements récurrents. La prise en charge de l'hypotension orthostatique/posturale peut inclure l'ajustement de médicaments anti-hypertenseurs, une rehydratation ou l'administration de minéralo-corticoïdes et/ou de sympathomimétiques. Les patients doivent être informés de la nécessité de consulter un médecin s'ils présentent des sensations de vertiges, étourdissements ou des épisodes de syncope.

#### Syndrome d'Encéphalopathie Postérieure Réversible (SEPR)

Des cas de SEPR ont été rapportés chez des patients recevant VELCADE. Le SEPR est une affection neurologique rare, souvent réversible, évoluant rapidement, qui peut se manifester par des convulsions, une hypertension, une céphalée, une léthargie, une confusion, une cécité et d'autres troubles visuels et neurologiques. Une imagerie cérébrale, de préférence une Imagerie par Résonance Magnétique (IRM), est réalisée pour confirmer le diagnostic. VELCADE doit être arrêté chez les patients développant un SEPR.

#### Insuffisance cardiaque

L'installation aiguë ou l'aggravation d'une insuffisance cardiaque congestive et/ou une poussée de diminution de la fraction d'éjection ventriculaire gauche a été rapportée(s) durant le traitement par le bortézomib. Une rétention hydrique peut être un facteur favorisant l'apparition de signes et de symptômes d'insuffisance cardiaque. Les patients ayant des facteurs de risque cardiaque ou une cardiopathie existante doivent être étroitement surveillés.

#### Examens électrocardiographiques

Des cas isolés d'allongement de l'intervalle QT ont été rapportés au cours des essais cliniques. La relation de causalité avec VELCADE n'a pas été établie.

#### Troubles pulmonaires

De rares cas de pathologie pulmonaire aiguë infiltrante diffuse d'étiologie indéterminée, telle qu'inflammations pulmonaires, pneumopathies interstitielles, infiltrats pulmonaires et syndrome de détresse respiratoire aiguë (SDRA) ont été rapportés chez des patients traités par VELCADE (voir rubrique 4.8). Certains de ces événements ont été fatals. Une radiographie pulmonaire est recommandée avant l'instauration du traitement afin d'avoir un cliché de référence pour détecter de potentiels changements après le traitement.

En cas d'apparition ou d'aggravation de signes pulmonaires (ex: toux, dyspnée), un diagnostic rapide devra être réalisé et ces patients traités de manière adéquate. Le rapport bénéfice/risque devra alors être réévalué avant la poursuite éventuelle du traitement par VELCADE.

Lors d'un essai clinique, deux patients (sur deux) traités par cytarabine à haute dose (2 g/m<sup>2</sup> par jour) en perfusion continue sur 24 heures associée à la daunorubicine et à VELCADE suite à une rechute d'une leucémie aiguë myéloïde, sont décédés d'un SDRA précocement après le début du traitement et l'étude a été arrêtée. Par conséquent, ce protocole spécifique d'association concomitante à la cytarabine à haute dose (2 g/m<sup>2</sup> par jour) en perfusion continue sur 24 heures n'est pas recommandée.

#### Insuffisance rénale

Les complications rénales sont fréquentes chez les patients atteints de myélome multiple. Les patients insuffisants rénaux doivent être étroitement surveillés (voir rubriques 4.2 et 5.2).

#### Insuffisance hépatique

Le bortézomib est métabolisé par les enzymes hépatiques. L'exposition au bortézomib est accrue chez les patients présentant une insuffisance hépatique modérée ou sévère; ces patients doivent être traités par VELCADE à doses réduites et étroitement surveillés quant à la toxicité (voir rubriques 4.2 et 5.2).

#### Réactions hépatiques

De rares cas d'insuffisance hépatique ont été rapportés chez des patients recevant VELCADE avec des traitements concomitants et ayant un mauvais état général sous-jacent. D'autres réactions hépatiques rapportées incluent des augmentations des enzymes hépatiques, hyperbilirubinémie et hépatite. De telles modifications peuvent être réversibles à l'arrêt du bortézomib (voir section 4.8).

#### Syndrome de lyse tumorale

Dans la mesure où le bortézomib est un agent cytotoxique et peut rapidement tuer les plasmocytes malins et les cellules du LCM, les complications d'un syndrome de lyse tumorale peuvent survenir. Les patients à risque de syndrome de lyse tumorale sont ceux ayant une forte masse tumorale avant le traitement. Ces patients doivent être surveillés étroitement et des précautions appropriées doivent être prises.

#### Traitements concomitants

Les patients qui reçoivent du bortézomib en association avec des inhibiteurs puissants du CYP3A4 doivent être étroitement surveillés. Des précautions doivent être prises lorsque le bortézomib est associé à des substrats du CYP3A4 ou du CYP2C19 (voir rubrique 4.5).

Une fonction hépatique normale doit être confirmée et la prudence devra être observée chez les patients recevant des hypoglycémifiants oraux (voir rubrique 4.5).

Réactions potentiellement médies par les complexes immuns

Des réactions potentiellement médies par les complexes immuns, telles que réactions à type de maladie sérique, polyarthrite avec éruption et glomérulonéphrite proliférative ont été rapportées de façon peu fréquente. Le bortézomib doit être arrêté si des réactions graves surviennent.

#### **4.5 Interactions avec d'autres médicaments et autres formes d'interactions**

Des études *in vitro* indiquent que le bortézomib est un faible inhibiteur des isoenzymes 1A2, 2C9, 2C19, 2D6 et 3A4 du cytochrome P450 (CYP). En se basant sur la contribution limitée (7 %) du CYP2D6 au métabolisme du bortézomib, le phénotype de métaboliseur lent du CYP2D6 ne semble pas devoir affecter le devenir général du bortézomib.

Une étude d'interaction évaluant l'effet du kétoconazole, un puissant inhibiteur du CYP3A4, sur la pharmacocinétique du bortézomib (injecté par voie intraveineuse), a montré une augmentation moyenne de l'ASC du bortézomib de 35 % (IC 90 % [1,032 à 1,1772]), sur la base de données issues de 12 patients. Par conséquent, les patients qui reçoivent du bortézomib en association avec des inhibiteurs puissants du CYP3A4 (ex: kétoconazole, itraconazole, ritonavir) doivent être étroitement surveillés.

Dans une étude d'interaction évaluant l'effet de l'oméprazole, un puissant inhibiteur du CYP2C19, sur la pharmacocinétique du bortézomib (injecté par voie intraveineuse), il n'y a pas eu d'effet significatif sur la pharmacocinétique du bortézomib, sur la base de données issues de 17 patients.

Une étude d'interaction évaluant l'effet de la rifampicine, un inducteur puissant du CYP3A4, sur la pharmacocinétique du bortézomib (injecté par voie intraveineuse), a montré une réduction moyenne de l'ASC du bortézomib de 45 %, sur la base de données issues de 6 patients. L'utilisation concomitante du bortézomib avec des inducteurs puissants du CYP3A4 (par exemple, rifampicine, carbamazépine, phénytoïne, phénobarbital et mullépertuis) n'est donc pas recommandée, son efficacité pouvant être réduite.

Au cours de la même étude d'interaction évaluant l'effet de la dexaméthasone, un inducteur plus faible du CYP3A4, sur la pharmacocinétique du bortézomib (injecté par voie intraveineuse), il n'y a pas eu d'effet significatif sur la pharmacocinétique du bortézomib, sur la base de données issues de 7 patients.

Une étude d'interaction évaluant l'effet de melphalan-prédisone sur la pharmacocinétique du bortézomib (injecté par voie intraveineuse), a montré une augmentation moyenne de l'ASC du bortézomib de 17 %, à partir des données de 21 patients. Ceci n'est pas considéré comme cliniquement pertinent.

Au cours des essais cliniques, des hypoglycémies et hyperglycémies ont été peu fréquemment et fréquemment rapportées chez des patients diabétiques recevant des hypoglycémifiants oraux. Les patients sous antidiabétiques oraux recevant VELCADE peuvent nécessiter une surveillance étroite de leur glycémie, et une adaptation de la dose de leurs antidiabétiques.

#### 4.6 Fertilité, grossesse et allaitement

Contraception chez les hommes et femmes

Les patients hommes et femmes en âge de procréer doivent utiliser des méthodes de contraception efficaces pendant et durant les 3 mois qui suivent le traitement.

#### Grossesse

Aucune donnée clinique n'est disponible pour le bortézomib concernant l'exposition durant la grossesse. Le potentiel tératogène du bortézomib n'a pas été complètement étudié.

Dans les études précliniques, le bortézomib n'a eu aucun effet sur le développement embryonnaire et foetal, chez le rat et le lapin, aux plus fortes doses tolérées par les mères. Aucune étude n'a été conduite chez l'animal pour déterminer les effets du bortézomib sur la mise bas et le développement post-natal (voir rubrique 5.3). VELCADE ne doit pas être utilisé au cours de la grossesse à moins que l'état clinique de la femme nécessite un traitement par VELCADE.

Si VELCADE est utilisé au cours de la grossesse, ou si la patiente devient enceinte au cours d'un traitement par ce médicament, il est nécessaire que celle-ci soit informée des risques potentiels pour le fœtus.

Le thalidomide est un agent tératogène humain connu pour provoquer des anomalies congénitales graves potentiellement létales chez l'enfant à naître. Le thalidomide est contre-indiqué pendant la grossesse et chez les femmes en âge de procréer à moins que toutes les conditions du programme de prévention de la grossesse du thalidomide ne soient remplies. Les patients recevant VELCADE en association au thalidomide doivent se conformer au programme de prévention de la grossesse du thalidomide. Se référer au Résumé des Caractéristiques du Produit du thalidomide pour plus d'information.

#### Allaitement

Il n'a pas été établi si le bortézomib est excrété dans le lait humain. Compte tenu du risque d'effets indésirables graves chez les nourrissons allaités, l'allaitement doit être interrompu au cours d'un traitement par VELCADE.

#### Fertilité

Des études de fertilité n'ont pas été menées avec VELCADE (voir rubrique 5.3).

#### 4.7 Effets sur l'aptitude à conduire des véhicules et à utiliser des machines

VELCADE peut avoir une influence modérée sur l'aptitude à conduire des véhicules et à utiliser des machines. VELCADE peut être associé très fréquemment à de la fatigue, fréquemment à des sensations de vertiges, peu fréquemment à des syncopes et fréquemment à une hypotension orthostatique/posturale ou à une vision trouble. Par conséquent, les patients doivent être prudents lorsqu'ils conduisent ou utilisent des machines et doivent être avertis de ne pas conduire ou utiliser de machine s'ils constatent ces symptômes (voir rubrique 4.8).

#### 4.8 Effets indésirables

##### Résumé du profil de tolérance

Les effets indésirables graves rapportés peu fréquemment pendant le traitement par VELCADE incluent insuffisance cardiaque, syndrome de lyse tumorale, hypertension pulmonaire, syndrome d'encéphalopathie postérieure réversible, pneumopathie infiltrative diffuse aiguë et plus rarement neuropathies autonomes.

Les effets indésirables les plus fréquemment rapportés pendant le traitement par VELCADE sont nausée, diarrhée, constipation, vomissement, fatigue, pyrexie, thrombopénie, anémie, neutropénie, neuropathie périphérique (y compris sensorielle), céphalée, paresthésie, diminution de l'appétit, dyspnée, rash, zona et myalgie.

#### Tableau résumé des effets indésirables

##### Myélome multiple

Les effets indésirables reportés dans le Tableau 7 ont été considérés par les investigateurs comme ayant au moins une relation causale possible ou probable avec VELCADE. Ces effets indésirables, inclus dans le Tableau 7, sont basés sur des données intégrant un groupe de 5 476 patients dont 3 996 ont été traités par VELCADE à la dose de 1,3 mg/m<sup>2</sup>.

Au total, VELCADE a été administré pour le traitement du myélome multiple chez 3 974 patients.

Les effets indésirables sont listés ci-dessous, groupés par système organe classe et fréquence. Les fréquences sont définies de la manière suivante: très fréquent ( $\geq 1/10$ ); fréquent ( $\geq 1/100$  à  $< 1/10$ ); peu fréquent ( $\geq 1/1000$  à  $< 1/100$ ); rare ( $\geq 1/10000$  à  $< 1/1000$ ); très rare ( $< 1/10000$ ); fréquence indéterminée (ne peut être estimée sur la base des données disponibles). Dans chaque groupe de fréquence, les effets indésirables sont présentés par ordre décroissant de gravité. Le tableau 7 a été généré en utilisant la version 14.1 du dictionnaire MedDRA.

Les effets rapportés après commercialisation et non observés dans les essais cliniques sont également inclts.

Tableau 7: Effets indésirables chez les patients atteints d'un myélome multiple traités par VELCADE en monothérapie ou en association

| Classe de systèmes d'organes                                          | Fréquence     | Effet indésirable                                                                                                                                                                                                                                                                                                                                                             |
|-----------------------------------------------------------------------|---------------|-------------------------------------------------------------------------------------------------------------------------------------------------------------------------------------------------------------------------------------------------------------------------------------------------------------------------------------------------------------------------------|
| Infectious et infestations                                            | Fréquent      | Zona (y compris diffus & oculaire), Pneumonie*, Herpès*, Infection fongique*                                                                                                                                                                                                                                                                                                  |
|                                                                       | Peu Fréquent  | Infection*, Infections bactériennes*, Infections virales*, Septicémie (incluant choc septique)*, Bronchopneumopathie, Infection à herpès virus*, Méningo-encéphalite herpétique*, Bactériémie (incluant staphylocoque), Orgelet, Grippe, Cellulite, Infection liée au dispositif, Infection cutanée*, Infection de l'oreille*, Infection à Staphylocoque, Infection dentaire* |
|                                                                       | Rare          | Méningite (y compris bactérienne), Infection par le virus d'Epsrein-Barr, Herpès génital, Angine, Masioidite, Syndrome de fatigue post-virale                                                                                                                                                                                                                                 |
| Tumeurs bénignes, malignes et non précisées (incl. kystes et polypes) | Rare          | Tumeur maligne, Leucémie à plasmocytes, Carcinome des cellules renales, Masse, Mycosis fongique, Tumeur bénigne*                                                                                                                                                                                                                                                              |
| Affections hématologiques et du système lymphatique                   | Très Fréquent | Thrombopénie*, Neutropénie*, Anémie*                                                                                                                                                                                                                                                                                                                                          |
|                                                                       | Fréquent      | Leucopénie*, Lymphopénie*                                                                                                                                                                                                                                                                                                                                                     |
|                                                                       | Peu Fréquent  | Pancytopénie*, Neutropénie fébrile, Coagulopathie*, Hyperleucocytose*, Lymphadénopathie, Anémie hémolytique*                                                                                                                                                                                                                                                                  |
|                                                                       | Rare          | Coagulation intravasculaire disséminée, Thrombocytose*, Syndrome d'hyperviscosité, Anomalies plaquettaires SAL, Purpura thrombocytopenique, Anomalies hématologiques SAL, Diathèse hémorragique, Infiltration lymphocytaire                                                                                                                                                   |
| Affections du système immunitaire                                     | Peu Fréquent  | Angio-œdème*, Hypersensibilité*                                                                                                                                                                                                                                                                                                                                               |
|                                                                       | Rare          | Choc anaphylactique, Amylose, Réaction médicamenteuse par le complexe immunitaire de type III                                                                                                                                                                                                                                                                                 |
| Affections endocriniennes                                             | Peu Fréquent  | Syndrome de Cushing*, Hypertthyroïdie*, Sécrétion inappropriée de l'hormone antidiabétique                                                                                                                                                                                                                                                                                    |
|                                                                       | Rare          | Hypothyroïdie                                                                                                                                                                                                                                                                                                                                                                 |

|                                            |               |                                                                                                                                                                                                                                                                                                                                                                                                                                                                                                                                            |                                                                                                       |
|--------------------------------------------|---------------|--------------------------------------------------------------------------------------------------------------------------------------------------------------------------------------------------------------------------------------------------------------------------------------------------------------------------------------------------------------------------------------------------------------------------------------------------------------------------------------------------------------------------------------------|-------------------------------------------------------------------------------------------------------|
| Troubles du métabolisme et de la nutrition | Très Fréquent | Diminution de l'appétit                                                                                                                                                                                                                                                                                                                                                                                                                                                                                                                    | Déshydratation, Hypokaliémie*, Hyponatémie*, Glycémie anormale*, Hypocalcémie*, Anomalie enzymatique* |
|                                            | Peu Fréquent  | Syndrome de lyse tumorale, Retard staturé-ponderal*, Hypomagnésémie*, Hypophosphatémie*, Hyperkaliémie*, Hypercalcémie*, Hypermaturémie*, Acide urique anormal*, Diabète*, Rétention hydrique                                                                                                                                                                                                                                                                                                                                              |                                                                                                       |
|                                            | Rare          | Hypermaghésémie*, Acidose, Déséquilibre électrolytique*, Surcharge hydrique, Hypochlorémie*, Hypovolémie, Hyperchlorémie*, Hyperphosphatémie*, Trouble Métabolique, Carence en complexe vitamérique B, Carence en vitamine B12, Goutte, Augmentation de l'appétit, Intolérance à l'alcool                                                                                                                                                                                                                                                  |                                                                                                       |
|                                            | Fréquent      | Troubles et altération de l'humeur*, Troubles anxieux*, Troubles et altération du sommeil*                                                                                                                                                                                                                                                                                                                                                                                                                                                 |                                                                                                       |
|                                            | Peu Fréquent  | Trouble mental*, Hallucination*, Trouble psychotique*, Confusion*, Impatience                                                                                                                                                                                                                                                                                                                                                                                                                                                              |                                                                                                       |
|                                            | Rare          | Idees suicidaires*, Trouble d'adaptation, Délire, Diminution de la libido                                                                                                                                                                                                                                                                                                                                                                                                                                                                  |                                                                                                       |
|                                            | Très Fréquent | Neuropathies*, Neuropathie sensitive périphérique, Dysesthésie*, Névralgie*                                                                                                                                                                                                                                                                                                                                                                                                                                                                |                                                                                                       |
|                                            | Fréquent      | Neuropathie motrice*, Perte de conscience (incluant syncope), Sensation de vertige*, Dysgueusie*, Léthargie, Céphalée*                                                                                                                                                                                                                                                                                                                                                                                                                     |                                                                                                       |
|                                            | Peu Fréquent  | Tremblement, Neuropathie périphérique sensorimotrice, Dyskinésie*, Troubles de la coordination et de l'équilibre d'origine cérébelleuse*, Perte de mémoire (excluant démence)*, Encéphalopathie*, Syndrome d'encéphalopathie postérieure réversible*, Neurotoxicité, Troubles convulsifs*, Névralgie post-herpétique, Troubles de l'élocution*, Syndrome des jambes sans repos, Migraine, Sclérose                                                                                                                                         |                                                                                                       |
|                                            | Rare          | Troubles de l'attention, Reflexes anormaux*, Parasomie                                                                                                                                                                                                                                                                                                                                                                                                                                                                                     |                                                                                                       |
| Affections oculaires                       | Fréquent      | Hémorragie cérébrale*, Hémorragie intracrânienne (y compris sous-arachnoïdienne)*, Œdème cérébral, Accident ischémique transitoire, Coma, Déséquilibre du système nerveux autonome, Neuropathie autonome, Paralyse cérébrale*, Paralysie*, Parésie*, Pré-syncope, Syndrome du tronc cérébral, Trouble cérébrovasculaire, Lésion de la racine des nerfs, Hyperactivité psychomotrice, Compression de la moelle épinière, Trouble cognitif SAI, Dysfonctionnement moteur, Troubles du système nerveux SAI, Radiculite, Salivation, Hypotonie |                                                                                                       |
|                                            | Peu Fréquent  | Gonflement oculaire*, Vision anormale*, Conjonctivite*, Hémorragie oculaire*, Infection de la paupière*, Inflammation oculaire*, Diplopie, Sécheresse oculaire*, Irritation oculaire*, Douleur oculaire, Augmentation de la sécrétion lacrymale, Ecoulement oculaire                                                                                                                                                                                                                                                                       |                                                                                                       |
|                                            | Rare          | Lésion cornéenne*, Exophtalmie, Rétinite, Scotome, Trouble oculaire (incluant la paupière) SAI, Dacryoadénite acquise, Photophobie, Photopsie, Neuropathie optique*, Différents degrés de déficience visuelle (allant jusqu'à la cécité)*                                                                                                                                                                                                                                                                                                  |                                                                                                       |
|                                            | Fréquent      | Vertige*                                                                                                                                                                                                                                                                                                                                                                                                                                                                                                                                   |                                                                                                       |
| Affections de l'oreille et du labyrinthe   | Peu Fréquent  | Dysacusie (incluant acouphènes)*, Altération de l'audition (jusqu'à et incluant surdité), Gêne auditive*                                                                                                                                                                                                                                                                                                                                                                                                                                   |                                                                                                       |
|                                            | Rare          | Hémorragie de l'oreille, Névrite vestibulaire, Affection de l'oreille SAI                                                                                                                                                                                                                                                                                                                                                                                                                                                                  |                                                                                                       |

|                                                        |              |                                                                                                                                                                                                                                                                                                                                                                                                                                                                                                                                |
|--------------------------------------------------------|--------------|--------------------------------------------------------------------------------------------------------------------------------------------------------------------------------------------------------------------------------------------------------------------------------------------------------------------------------------------------------------------------------------------------------------------------------------------------------------------------------------------------------------------------------|
| Affections cardiaques                                  | Peu Fréquent | Tamponnade cardiaque*, Arrêt cardiorespiratoire*, Fibrillation cardiaque (y compris auriculaire), Insuffisance cardiaque (incluant ventriculaire gauche et droite)*, Arrythmie*, Tachycardie*, Palpitations, Angor, Péricardite (incluant épanchement péricardique)*, Cardiomyopathie*, Dysfonction ventriculaire*, Bradycardie                                                                                                                                                                                                |
|                                                        | Rare         | Flutter auriculaire, Infarctus du myocarde*, Bloc auriculo-ventriculaire*, Trouble cardiovasculaire (incluant choc cardiogénique), Torsade de pointes, Angor instable, Troubles des valves cardiaques*, Insuffisance coronarienne, Arrêt sinusal                                                                                                                                                                                                                                                                               |
|                                                        | Fréquent     | Hypertension*, Hypotension orthostatique, Hypertension*                                                                                                                                                                                                                                                                                                                                                                                                                                                                        |
|                                                        | Peu Fréquent | Accident vasculaire cérébral*, Thrombose veineuse profonde*, Hémorragie*, Thrombophlébite (y compris superficielle), Collapsus circulatoire (incluant choc hypovolémique), Phlébite, Bouffée vasomotrice*, Hématome (y compris péri-rénaire)*, Insuffisance circulatoire périphérique*, Vasculite, Hypertémie (y compris oculaire)*                                                                                                                                                                                            |
| Affections respiratoires, thoraciques et médiastinales | Rare         | Embolie périphérique, Lymphoedème, Pâleur, Erythromélalgie, Vasodilatation, Dyschromie veineuse, Insuffisance veineuse                                                                                                                                                                                                                                                                                                                                                                                                         |
|                                                        | Fréquent     | Dyspnée*, Epistaxis, Infection des voies respiratoires supérieures/inférieures*, Toux*                                                                                                                                                                                                                                                                                                                                                                                                                                         |
|                                                        | Peu Fréquent | Embolie pulmonaire, Epanchement pleural, Œdème pulmonaire (y compris aigu), Hémorragie alvéolaire pulmonaire*, Bronchospasme, Broncho-pneumopathie chronique obstructive*, Hypoxémie*, Congestion du trachus respiratoire*, Hypoxie, Pleurésie*, Hoquet, Rhinorrhée, Dysphonie, Respiration sifflante                                                                                                                                                                                                                          |
|                                                        | Rare         | Insuffisance respiratoire, Syndrome de détresse respiratoire aiguë, Apnée, Pneumothorax, Atélectasie, Hypertension pulmonaire, Hémoptysie, Hyperventilation, Orthopnée, Pneumopathie inflammatoire, Alcalose respiratoire, Tachypnée, Fibrose pulmonaire, Trouble bronchique*, Hypocapnie*, Pneumopathie interstitielle, Infiltration pulmonaire, Construction de la gorge, Gorge sèche, Augmentation des sécrétions des voies aériennes supérieures, Irritation de la gorge, Syndrome de toux des voies aériennes supérieures |

|                                                 |               |                                                                                                                                                                                                                                                                                                                                                                                                                                                                                                                                                    |
|-------------------------------------------------|---------------|----------------------------------------------------------------------------------------------------------------------------------------------------------------------------------------------------------------------------------------------------------------------------------------------------------------------------------------------------------------------------------------------------------------------------------------------------------------------------------------------------------------------------------------------------|
| Affections gastro-intestinales                  | Très Fréquent | Symptômes de nausées et vomissements*, Diarrhées*, Constipation                                                                                                                                                                                                                                                                                                                                                                                                                                                                                    |
|                                                 | Fréquent      | Hémorragie gastro-intestinale (y compris de la muqueuse)*, Dyspepsie, Stomatite*, Distension abdominale, Douleur oropharyngée*, Douleur abdominale (y compris douleur gastro-intestinale et splénique)*, Affection buccale*, Flatulence                                                                                                                                                                                                                                                                                                            |
|                                                 | Peu Fréquent  | Pancréatite (y compris chronique)*, Hématémèse, Gonflement labial*, Obstruction gastro-intestinale (y compris obstruction de l'intestin grêle, iléus)*, Gène abdominale, Ulcération orale*, Entérite*, Gastrite*, Saignement gingival, Reflux gastro-œsophagien*, Colite (incluant colite à Clostridium difficile)*, Colite ischémique*, Inflammation gastro-intestinale*, Dysphagie, Syndrome du côlon irritable, Affections gastro-intestinales SAI, Langue chargée, Trouble de la motilité gastro-intestinale*, Trouble d'une glande salivaire* |
|                                                 | Rare          | Pancréatite aiguë, Péritonite*, Œdème de la langue*, Ascites, Gésophagite, Chéllite, Incontinence fécale, Atonie du sphincter anal, Fécalomé*, Ulcération et perforation gastro-intestinale*, Hypertrophie gingivale, Mégacolon, Écoulement rectal, Vésicules oropharyngées*, Douleur labiale, Parodontite, Fissure anale, Modification du transit intestinal, Proctalgie, Fèces anormales                                                                                                                                                         |
| Affections hépatobiliaires                      | Fréquent      | Anomalie des enzymes hépatiques*                                                                                                                                                                                                                                                                                                                                                                                                                                                                                                                   |
|                                                 | Peu Fréquent  | Hépatotoxicité (incluant trouble hépatique), Hépatite*, Cholestase                                                                                                                                                                                                                                                                                                                                                                                                                                                                                 |
|                                                 | Rare          | Insuffisance hépatique, Hépatomégalie, Syndrome de Budd-Chiari, Hépatite à cytomégalovirus, Hémorragie hépatique, Cholestase                                                                                                                                                                                                                                                                                                                                                                                                                       |
| Affections de la peau et du tissu sous-cutané   | Fréquent      | Eruption cutanée*, Prurit*, Erythème, Sécheresse cutanée                                                                                                                                                                                                                                                                                                                                                                                                                                                                                           |
|                                                 | Peu Fréquent  | Erythème multiforme, Urticaire, Dermatose aiguë fébrile neutrophilique, Toxicodermie, Nécrolyse épidermique toxique*, Syndrome de Stevens-Johnson*, Dermate* , Troubles de la pilosité*, Peièche, Eczéma, Lésion cutanée, Purpura, Masse cutanée*, Psoriasis, Hyperhidrose, Sueurs nocturnes, Ulcère de décubitus*, Acné*, Ampoules*, Troubles de la pigmentation*                                                                                                                                                                                 |
|                                                 | Rare          | Réaction cutanée, Infiltration lymphocytaire de Jessner, Syndrome d'érythrodermie palmo-plantaire, Hémorragie sous-cutanée, Livido réticulaire, Induration cutanée, Papule, Réaction de photosensibilisation, Séborrhée, Sueurs froides, Troubles cutanés SAI, Erythrodermie, Ulcère cutané, Trouble inguéal                                                                                                                                                                                                                                       |
| Affections musculo-squelettiques et systémiques | Très Fréquent | Douleur musculo-squelettique*                                                                                                                                                                                                                                                                                                                                                                                                                                                                                                                      |
|                                                 | Fréquent      | Spasmes musculaires*, Douleur aux extrémités, Faiblesse musculaire                                                                                                                                                                                                                                                                                                                                                                                                                                                                                 |
|                                                 | Peu Fréquent  | Contractions fasciculaires, Gonflement articulaire, Arthrite*, Raideur articulaire, Myopathies*, Sensation de lourdeur                                                                                                                                                                                                                                                                                                                                                                                                                             |
|                                                 | Rare          | Rhabdomyolyse, Syndrome de l'articulation temporo-mandibulaire, Fimble, Epanchement articulaire, Douleur dans la mâchoire, Troubles osseux, Infections et inflammations musculo-squelettiques et systémiques*, Kyste synovial                                                                                                                                                                                                                                                                                                                      |
| Affections du rein et des voies urinaires       | Fréquent      | Altérite rénale*                                                                                                                                                                                                                                                                                                                                                                                                                                                                                                                                   |
|                                                 | Peu Fréquent  | Insuffisance rénale aiguë, Insuffisance rénale chronique*, Infection des voies urinaires*, Signes et symptômes des voies urinaires*, Hématurie*, Rétention urinaire, Trouble de la miction*, Protéinurie, Azotémie, Oligurie*, Pollakiurie                                                                                                                                                                                                                                                                                                         |
|                                                 | Rare          | Irritation vésicale                                                                                                                                                                                                                                                                                                                                                                                                                                                                                                                                |

|                                                              |                           |                                                                                                                                                                                                                                                                                                                                                                                                                                                                                                                                                                                                                                                                                                          |
|--------------------------------------------------------------|---------------------------|----------------------------------------------------------------------------------------------------------------------------------------------------------------------------------------------------------------------------------------------------------------------------------------------------------------------------------------------------------------------------------------------------------------------------------------------------------------------------------------------------------------------------------------------------------------------------------------------------------------------------------------------------------------------------------------------------------|
| Affections des organes de reproduction et du sein            | Peu Fréquent              | Hémorragie vaginale, Douleur génitale*, Dysfonctionnement érectile                                                                                                                                                                                                                                                                                                                                                                                                                                                                                                                                                                                                                                       |
|                                                              | Rare                      | Trouble testiculaire*, Prostatite, Affections des seins chez la femme, Sensibilité épiddymaire, Epididymite, Douleur pelvienne, Ulcération vulvaire                                                                                                                                                                                                                                                                                                                                                                                                                                                                                                                                                      |
| Affections congénitales, familiales et génétiques            | Rare                      | Aplasie, Malformation gastro-intestinale, Ichtyose                                                                                                                                                                                                                                                                                                                                                                                                                                                                                                                                                                                                                                                       |
|                                                              | Très Fréquent<br>Fréquent | Pyrexie*, Fatigue, Asthénie (Œdème (y compris périphérique)), Frissons, Douleur*, Malaise*                                                                                                                                                                                                                                                                                                                                                                                                                                                                                                                                                                                                               |
|                                                              | Peu Fréquent              | Altération de l'état général*, Œdème du visage*, Réaction au point d'injection*, Affection des muqueuses*, Douleur thoracique, Troubles de la démarche, Sensation de froid, Extravasation*, Complication liée au cathéter*, Modification de la soif*, Gène thoracique, Sensation de changement de la température corporelle*, Douleur au point d'injection*, Décès (y compris soudain), Défaillance multi-viscérale, Hémorragie au point d'injection*, Hernie (y compris hiatale)*, Retard à la cicatrisation*, Inflammation, Phlébite au point d'injection*, Sensibilité au toucher, Ulcère, Irritabilité, Douleur thoracique non cardiaque, Douleur au niveau du cathéter, Sensation de corps étranger |
| Investigations                                               | Fréquent                  | Perte de poids                                                                                                                                                                                                                                                                                                                                                                                                                                                                                                                                                                                                                                                                                           |
|                                                              | Peu Fréquent              | Hyperbilirubinémie*, Analyses des protéines anormales*, Prise de poids, Test sanguins anormaux*, Augmentation de la protéine C réactive                                                                                                                                                                                                                                                                                                                                                                                                                                                                                                                                                                  |
|                                                              | Rare                      | Gaz du sang anormaux*, Anomalies à l'électrocardiogramme (incluant prolongation du QT)*, INR (international normalised ratio) anormal*, Diminution du pH gastrique, Augmentation de l'agrégation plaquettaire, Augmentation de la troponine I, Identification et sérologie virale*, Analyse urinaire anormale*                                                                                                                                                                                                                                                                                                                                                                                           |
| Lésions, intoxications et complications liées aux procédures | Peu Fréquent              | Chûte, Contusion                                                                                                                                                                                                                                                                                                                                                                                                                                                                                                                                                                                                                                                                                         |
|                                                              | Rare                      | Réaction transfusionnelle, Fractures*, Frissons*, Lésion faciale, Lésion articulaire*, Brûlures, Lacération, Douleur liée à la procédure, Lésions radiques*                                                                                                                                                                                                                                                                                                                                                                                                                                                                                                                                              |
| Actes médicaux et chirurgicaux                               | Rare                      | Activation des macrophages                                                                                                                                                                                                                                                                                                                                                                                                                                                                                                                                                                                                                                                                               |

SAI = Sans autre indication

\* regroupement de plus d'un terme préférentiel MedDRA

# Effet rapporté après commercialisation

**Lymphome à cellules du manteau (LCM)**

Le profil de sécurité de VELCADE chez 240 patients atteints d'un LCM traités par VELCADE à la dose de 1,3 mg/m<sup>2</sup> en association au rituximab, cyclophosphamide, doxorubicine et prednisone (VcR-CAP), versus 242 patients traités par rituximab, cyclophosphamide, doxorubicine, vincristine, et prednisone [R-CHOP] était relativement similaire à celui observé chez les patients atteints d'un myélome multiple, avec comme principales différences celles décrites ci-dessous. Les effets indésirables supplémentaires identifiés avec l'utilisation de l'association VcR-CAP ont été l'infection par le virus de l'hépatite B (< 1 %) et l'ischémie myocardique (1,3 %). Les fréquences similaires de ces événements dans les deux bras de traitement indiquent que ces effets indésirables ne sont pas attribuables à VELCADE seul. Les différences notables dans la population de patients atteints d'un LCM par rapport aux patients inclus dans les études conduites dans le myélome multiple ont été une fréquence plus élevée d'au moins 5 % des effets indésirables hématologiques (neutropénie, thrombopénie, leucopénie, anémie, lymphopénie), des neuropathies périphériques sensitives, de l'hypertension, des pyrexies, des pneumonies, des stomatites et des troubles de la pilosité.

Les effets indésirables identifiés comme ceux ayant une fréquence ≥ 1 %, une fréquence similaire ou supérieure dans le bras VcR-CAP et avec au moins une relation causale possible ou probable avec les médicaments utilisés dans le bras VcR-CAP, sont listés dans le Tableau 8 ci-dessous. Sont également inclus les effets indésirables identifiés dans le bras VcR-CAP considérés par les investigateurs comme



ayant au moins une relation causale possible ou probable avec VELCADE sur la base des données historiques des études conduites dans le myélome multiple.

Les effets indésirables sont listés ci-dessous, groupés par système organe classe et fréquence. Les fréquences sont définies de la manière suivante: très fréquent ( $\geq 1/10$ ); fréquent ( $\geq 1/100$  à  $< 1/10$ ); peu fréquent ( $\geq 1/1000$  à  $< 1/100$ ); rare ( $\geq 1/10000$  à  $< 1/1000$ ); très rare ( $< 1/10000$ ), fréquence indéterminée (ne peut être estimée sur la base des données disponibles). Dans chaque groupe de fréquence, les effets indésirables sont présentés par ordre décroissant de gravité. Le Tableau 8 a été généré en utilisant la version 16 du dictionnaire MedDRA.

Tableau 8 : Effets indésirables chez les patients atteints d'un lymphome à cellules du manteau traités par VcR-CAP.

| Classe de systèmes d'organes                           | Fréquence     | Effet indésirable                                                                                                                                                                                                                                                                                           |
|--------------------------------------------------------|---------------|-------------------------------------------------------------------------------------------------------------------------------------------------------------------------------------------------------------------------------------------------------------------------------------------------------------|
| Infections and infestations                            | Très fréquent | Pneumonie*                                                                                                                                                                                                                                                                                                  |
|                                                        | Fréquent      | Septicémie (incluant choc septique)*, Zona (y compris diffus et ophthalgique), Infection à herpès virus*, Infections bactériennes*<br>Infection des voies respiratoires supérieures/inférieures*, Infection fongique*, Herpès*                                                                              |
| Affections hématologiques et du système lymphatique    | Peu fréquent  | Hépatite B, Infection*, Bronchopneumonie                                                                                                                                                                                                                                                                    |
|                                                        | Très fréquent | Thrombopénie*, Neutropénie fébrile, Neutropénie*, Leucopénie*, Anémie*, Lymphopénie*                                                                                                                                                                                                                        |
|                                                        | Peu fréquent  | Pancytopénie*                                                                                                                                                                                                                                                                                               |
| Affections du système immunitaire                      | Fréquent      | Hypersensibilité*                                                                                                                                                                                                                                                                                           |
| Troubles du métabolisme et de la nutrition             | Peu fréquent  | Réaction anaphylactique                                                                                                                                                                                                                                                                                     |
|                                                        | Très fréquent | Diminution de l'appétit                                                                                                                                                                                                                                                                                     |
|                                                        | Fréquent      | Hypokaliémie*, Glycémie anormale*, Hyponatrémie*, Diabète*, Rétention hydrique                                                                                                                                                                                                                              |
|                                                        | Peu fréquent  | Syndrome de lyse tumorale                                                                                                                                                                                                                                                                                   |
| Affections psychiatriques                              | Fréquent      | Troubles et altération du sommeil*                                                                                                                                                                                                                                                                          |
| Affections du système nerveux                          | Très fréquent | Neuropathie périphérique sensitive, Dysesthésie*, Névralgie*                                                                                                                                                                                                                                                |
|                                                        | Fréquent      | Neuropathies*, Neuropathie motrice*, Perte de conscience (incluant syncope), Encéphalopathie*, Neuropathie périphérique sensorimotrice, Sensation de vertige*, Dysgueusie*, Neuropathie autonome                                                                                                            |
|                                                        | Peu fréquent  | Déséquilibre du système nerveux autonome                                                                                                                                                                                                                                                                    |
| Affections oculaires                                   | Fréquent      | Vision anormale*                                                                                                                                                                                                                                                                                            |
| Affection de l'oreille et du labyrinthe                | Fréquent      | Dysacousie (incluant acouphènes)*                                                                                                                                                                                                                                                                           |
| Affections cardiaques                                  | Fréquent      | Vertige*, Altération de l'audition (jusqu'à et incluant surdité)<br>Fibrillation cardiaque (y compris auriculaire), Arythmie*, Insuffisance cardiaque (incluant ventriculaire gauche et droite)*, Ischémie myocardique, Dysfonction ventriculaire*                                                          |
| Affections vasculaires                                 | Peu fréquent  | Trouble cardiovasculaire (incluant choc cardiogénique)                                                                                                                                                                                                                                                      |
|                                                        | Fréquent      | Hypertension*, Hypotension*, Hypotension orthostatique                                                                                                                                                                                                                                                      |
| Affections respiratoires, thoraciques et médiastinales | Fréquent      | Dyspnée*, Toux*, Hoquet                                                                                                                                                                                                                                                                                     |
|                                                        | Peu fréquent  | Syndrome de détresse respiratoire aiguë, Embolie pulmonaire, Pneumopathie inflammatoire, Hypertension pulmonaire, (Edème pulmonaire (y compris aigu))                                                                                                                                                       |
| Affections gastro-intestinales                         | Très fréquent | Symptômes de nausées et vomissements*, Diarrhées*, Stomatite*, Constipation                                                                                                                                                                                                                                 |
|                                                        | Fréquent      | Hémorragie gastro-intestinale (y compris de la muqueuse)*, Distension abdominale, Dyspepsie, Douleur oropharyngée*, Gastrite*, Ulcération orale*, Gêne abdominale, Dysphagie, Inflammation gastro-intestinale*, Douleur abdominale (y compris douleur gastro-intestinale et splénique)*, Affection buccale* |
|                                                        | Peu fréquent  | Colite (incluant colite à Clostridium difficile)*                                                                                                                                                                                                                                                           |
| Affections hépatobiliaires                             | Fréquent      | Hépatotoxicité (incluant troubles hépatiques)                                                                                                                                                                                                                                                               |
|                                                        | Peu fréquent  | Insuffisance hépatique                                                                                                                                                                                                                                                                                      |

|                                                         |               |                                                                                                                 |
|---------------------------------------------------------|---------------|-----------------------------------------------------------------------------------------------------------------|
| Affections de la peau et du tissu sous-cutané           | Très fréquent | Trouble de la pilosité*                                                                                         |
|                                                         | Fréquent      | Prurit*, Dermatite*, Rash*                                                                                      |
| Affections musculo-squelettiques et systémiques         | Fréquent      | Spasmes musculaires*, Douleur musculo-squelettique*, Douleur aux extrémités                                     |
| Affections du rein et des voies urinaires               | Fréquent      | Infection des voies urinaires*                                                                                  |
| Troubles généraux et anomalies au site d'administration | Très fréquent | Pyrexie*, Fatigue, Asthénie (Edème (y compris périphérique)), Frissons, Douleur au point d'injection*, Malaise* |
| Investigations                                          | Fréquent      | Hyperbilirubinémie*, Analyse des protéines anormales*, Perte de poids, Prise de poids                           |

\* Regroupement de plus d'un terme préférentiel MedDRA

#### Description d'effets indésirables particuliers

##### Réactivation du zona

##### Myélome multiple

Une prophylaxie antivirale a été administrée chez 26 % des patients du bras Vc+M+P. La fréquence de réactivation du zona chez les patients du bras Vc+M+P était de 17 % pour les patients n'ayant pas reçu de prophylaxie antivirale, contre 3 % pour ceux ayant bénéficié d'une prophylaxie antivirale.

##### Lymphome à cellules du manteau

Une prophylaxie antivirale a été administrée à 137 des 240 patients (57 %) du bras VcR-CAP. La fréquence de réactivation du zona chez les patients du bras VcR-CAP était de 10,7 % pour les patients n'ayant pas reçu de prophylaxie antivirale, contre 3,6 % pour les patients ayant bénéficié d'une prophylaxie antivirale (voir rubrique 4.4).

##### Réactivation et infection par le virus de l'hépatite B (VHB)

##### Lymphome à cellules du manteau

Une infection par le VHB d'évolution fatale est survenue chez 0,8 % (n = 2) des patients du bras non traité par VELCADE (rituximab, cyclophosphamide, doxorubicine, vincristine et prednisone : R-CHOP) et chez 0,4 % (n = 1) des patients ayant reçu VELCADE en association à rituximab, cyclophosphamide, doxorubicine et prednisone (VcR-CAP). La fréquence globale d'infection par le virus de l'hépatite B était similaire chez les patients traités par VcR-CAP ou par R-CHOP (0,8 % vs 1,2 % respectivement).

##### Neuropathie périphérique avec les traitements en association

##### Myélome Multiple

Dans les essais dans lesquels VELCADE était administré comme traitement d'induction en association à la dexaméthasone (étude IFM-2005-01), et à la dexaméthasone-thalidomide (étude MMY-3010), la fréquence des neuropathies périphériques avec les traitements en association est présentée dans le tableau ci-dessous:

Tableau 9: Fréquence des neuropathies périphériques pendant le traitement d'induction en fonction de la sévérité et fréquence des arrêts de traitement liés à une neuropathie périphérique

| Fréquence des NP (%) | IFM-2005-01    |                | MMY-3010      |                 |
|----------------------|----------------|----------------|---------------|-----------------|
|                      | VDDx (N = 239) | VcDx (N = 239) | IDx (N = 126) | VcIDx (N = 130) |
| NP, tout grade       | 3              | 15             | 12            | 45              |
| NP $\geq$ Grade 2    | 1              | 10             | 2             | 31              |
| NP $\geq$ Grade 3    | < 1            | 5              | 0             | 5               |
| Arrêt lié aux NP (%) | < 1            | 2              | 1             | 5               |

VDDx = vincristine, doxorubicine, dexaméthasone; VcDx = VELCADE, dexaméthasone; IDx = thalidomide, dexaméthasone; VcIDx = VELCADE, thalidomide, dexaméthasone; NP = neuropathie périphérique

Note: Neuropathie périphérique incluant les termes préférentiels : neuropathie périphérique, neuropathie périphérique motrice, neuropathie périphérique sensitive et polyneuropathie.

Lymphome à cellules du manteau

Dans l'étude LYM-3002, dans laquelle VELCADE a été administré en association au rituximab, cyclophosphamide, doxorubicine et prednisone (R-CAP), la fréquence des neuropathies périphériques par groupe de traitement est présentée dans le tableau ci-dessous:

Tableau 10: Fréquence des neuropathies périphériques dans l'étude LYM-3002 par toxicité et fréquence d'arrêt de traitement lié aux neuropathies périphériques

|                      | VcR-CAP<br>(N = 240) | R-CHOP<br>(N = 242) |
|----------------------|----------------------|---------------------|
| Fréquence des NP (%) |                      |                     |
| NP de tout Grade     | 30                   | 29                  |
| NP de Grade ≥ 2      | 18                   | 9                   |
| NP de Grade ≥ 3      | 8                    | 4                   |
| Arrêt lié aux NP (%) | 2                    | < 1                 |

VcR-CAP = VELCADE, rituximab, cyclophosphamide, doxorubicine et prednisone; R-CHOP = rituximab, cyclophosphamide, doxorubicine, vincristine et prednisone. NP = neuropathie périphérique

Neuropathie périphérique incluant: les termes préférentiels: neuropathie périphérique sensitive; neuropathie périphérique; neuropathie périphérique motrice et neuropathie périphérique sensorio-motrice.

#### Patients âgés atteints d'un LCM

42,9 % et 10,4 % des patients du bras VcR-CAP avaient entre 65-74 ans et ≥ 75 ans, respectivement. Bien que chez les patients âgés de ≥ 75 ans, VcR-CAP et R-CHOP ont été moins bien tolérés, le taux d'événements indésirables graves était de 68 % dans le bras VcR-CAP, comparé à 42 % dans le bras R-CHOP.

#### Retraitement des patients ayant un myélome multiple en rechute

Dans une étude dans laquelle 130 patients avec un myélome multiple en rechute, avant eu précédemment au moins une réponse partielle à un traitement comprenant VELCADE, ont été retraités par VELCADE, les effets indésirables de tout grade les plus fréquents survenant chez au moins 25 % des patients étaient thrombopénie (55 %), neuropathie (40 %), anémie (37 %), diarrhées (35 %), et constipation (28 %). Les neuropathies périphériques de tout grade et celles de grade ≥ 3 ont été observées chez 40 % et 8,5 % des patients respectivement.

#### Déclaration des effets indésirables suspectés

La déclaration des effets indésirables suspectés après autorisation du médicament est importante. Elle permet une surveillance continue du rapport bénéfice/risque du médicament. Les professionnels de santé déclarent tout effet indésirable suspecté via le système national de déclaration – voir Annexe V

#### 4.9 Surdosage

Chez les patients, des surdosages à des doses plus de deux fois supérieures à la dose recommandée ont été associés à une survenue brutale d'hypotension symptomatique et à des thrombopénies d'évolution fatale. Pour les essais pharmacologiques précliniques de tolérance cardiovasculaire, voir rubrique 5.3.

Il n'y a pas d'antidote spécifique connu en cas de surdosage par bortézomib. Dans l'éventualité d'un surdosage, les signes vitaux du patient doivent être surveillés et des traitements de soutien appropriés doivent être administrés afin de maintenir la pression artérielle (solutés de remplissage, agents vasopresseurs et/ou inotropes) et la température corporelle (voir rubriques 4.2 et 4.4).

## 5. PROPRIÉTÉS PHARMACOLOGIQUES

### 5.1 Propriétés pharmacodynamiques

Classe pharmacothérapeutique: Agents antinéoplasiques, autres agents antinéoplasiques, Code ATC: L01XX32.

#### Mécanisme d'action

Le bortézomib est un inhibiteur du protéasome. Il est spécifiquement conçu pour inhiber l'activité chymotrypsine-like du protéasome 26S des cellules des mammifères. Le protéasome 26S est un large complexe protéique qui dégrade les protéines sur lesquelles est fixée l'ubiquitine. La voie ubiquitine - protéasome joue un rôle essentiel dans la régulation du renouvellement des protéines spécifiques, maintenant ainsi l'homéostasie à l'intérieur des cellules. L'inhibition du protéasome 26S empêche cette protéolyse ciblée et affecte de multiples cascades de signaux à l'intérieur de la cellule, entraînant finalement la mort de la cellule cancéreuse.

Le bortézomib inhibe très sélectivement le protéasome. À des concentrations de 10 µM, le bortézomib n'exerce aucune inhibition sur une large variété de récepteurs et de protéases sélectionnées, et il est plus de 1 500 fois plus sélectif pour le protéasome que pour l'enzyme présentant l'affinité la plus proche. La cinétique de l'inhibition du protéasome a été évaluée *in vitro*, et il a été montré que le bortézomib se dissociait du protéasome avec un  $t_{1/2}$  de 20 minutes, démontrant ainsi que l'inhibition du protéasome par le bortézomib est réversible.

L'inhibition du protéasome par le bortézomib affecte les cellules cancéreuses de nombreuses façons, incluant, mais de manière non limitative, l'altération des protéines régulatrices, qui contrôlent la progression du cycle cellulaire et l'activation du facteur nucléaire kappa B (NF-κB).

L'inhibition du protéasome entraîne un arrêt du cycle cellulaire et une apoptose. Le NF-κB est un facteur de transcription dont l'activation est nécessaire dans de nombreux aspects de la genèse tumorale, notamment la croissance et la survie cellulaires, l'angiogénèse, les interactions entre les cellules et les métastases. Dans le myélome, le bortézomib affecte la capacité des cellules myélomateuses à interagir avec le micro-environnement de la moelle osseuse.

Des expérimentations ont démontré que le bortézomib est cytotoxique sur divers types de cellules cancéreuses, et que les cellules cancéreuses étaient plus sensibles aux effets pro-apoptotiques de l'inhibition du protéasome que les cellules normales. Le bortézomib entraîne une réduction de la croissance tumorale *in vivo* dans de nombreux modèles précliniques de tumeurs, dont le myélome multiple.

Les données d'études *in vitro*, *ex vivo* et sur modèles animaux avec le bortézomib suggèrent une augmentation de la différenciation et de l'activité ostéoblastique et une inhibition de la fonction ostéoclastique. Ces effets ont été observés chez des patients atteints de myélome multiple avec ostéolyse avancée et traités par le bortézomib.

#### Efficacité clinique dans le myélome multiple non traité au préalable

Une étude clinique (MMY-3002 VISTA) prospective de phase III, internationale, randomisée (1-1), ouverte, chez 682 patients atteints de myélome multiple non traité au préalable, a été menée afin de déterminer si VELCADE (1,3 mg/m<sup>2</sup> injecté par voie intraveineuse) en association au melphalan (9 mg/m<sup>2</sup>) et à la prednisone (60 mg/m<sup>2</sup>) entraînait une amélioration du temps jusqu'à progression (TTP) comparé au melphalan (9 mg/m<sup>2</sup>) et à la prednisone (60 mg/m<sup>2</sup>). Le traitement a été administré sur un maximum de 9 cycles (54 semaines environ), et était arrêté prématurément en cas de progression de la maladie ou de toxicité majeure. L'âge médian des patients dans l'étude était de 71 ans, 50 % étaient des hommes, 88 % étaient caucasiens et l'indice de performance de Karnofsky médian des patients était 80. Les patients avaient un myélome à IgG/IgA/Chaîne légère dans 63 %/25 %/8 % des cas, une hémoglobine médiane de 105 g/l, et une numération plaquettaire médiane de 221,5 x 10<sup>9</sup>/l. Les proportions de patients ayant une clairance de la créatinine ≤ 30 ml/min étaient similaires entre les 2 bras (3 % dans chaque bras).

Lors d'une analyse intermédiaire prévue, l'objectif principal, à savoir le temps jusqu'à progression, était atteint et un traitement par Vc+M+P a été proposé aux patients du bras M+P. La durée médiane de survi était de 16,3 mois. L'actualisation finale des données de survie a été réalisée avec une durée médiane de survi de 60,1 mois. Un bénéfice de survie statistiquement significatif en faveur du groupe traité par Vc+M+P a été observé (RR = 0,695; p = 0,00043) malgré l'utilisation de thérapies ultérieures incluant VELCADE. La survie médiane du groupe traité par Vc+M+P était de 56,4 mois

comparée à 43,1 mois pour le groupe traité par M+P. Les résultats d'efficacité sont présentés dans le Tableau 11:

| Paramètre d'efficacité                            | Vc+M+P<br>n = 344 | M+P<br>n = 338     |
|---------------------------------------------------|-------------------|--------------------|
| <b>Temps jusqu'à progression –</b>                |                   |                    |
| Événements n (%)                                  | 101 (29)          | 152 (45)           |
| Médiane <sup>a</sup> (mois)                       | 20,7              | 15,0               |
| (IC à 95 %)                                       | (17,6, 24,7)      | (14,1, 17,9)       |
| Risque relatif <sup>b</sup>                       |                   | 0,54               |
| (IC à 95 %)                                       |                   | (0,42, 0,70)       |
| valeur de p <sup>c</sup>                          |                   | 0,000002           |
| <b>Survie sans progression</b>                    |                   |                    |
| Événements n (%)                                  | 135 (39)          | 190 (56)           |
| Médiane <sup>a</sup> (mois)                       | 18,3              | 14,0               |
| (IC à 95 %)                                       | (16,6, 21,7)      | (11,1, 15,0)       |
| Risque relatif <sup>b</sup>                       |                   | 0,61               |
| (IC à 95 %)                                       |                   | (0,49, 0,76)       |
| valeur de p <sup>c</sup>                          |                   | 0,00001            |
| <b>Survie globale<sup>a</sup></b>                 |                   |                    |
| Événements (décès) n (%)                          | 176 (51,2)        | 211 (62,4)         |
| Médiane <sup>a</sup> (mois)                       | 56,4              | 43,1               |
| (IC à 95 %)                                       | (52,8, 60,9)      | (35,3, 48,3)       |
| Risque relatif <sup>b</sup>                       |                   | 0,695              |
| (IC à 95 %)                                       |                   | (0,567, 0,852)     |
| valeur de p <sup>c</sup>                          |                   | 0,00043            |
| <b>Taux de réponse</b>                            |                   |                    |
| population <sup>a</sup> n = 668                   | n = 337           | n = 331            |
| RC <sup>c</sup> n (%)                             | 102 (30)          | 12 (4)             |
| RP <sup>d</sup> n (%)                             | 136 (40)          | 103 (31)           |
| nRC n (%)                                         | 5 (1)             | 0                  |
| RC+RP <sup>e</sup> n (%)                          | 238 (71)          | 115 (35)           |
| valeur de p <sup>a</sup>                          |                   | <10 <sup>-16</sup> |
| <b>Réduction du taux sérique de la protéine M</b> |                   |                    |
| population <sup>a</sup> n = 667                   | n = 336           | n = 331            |
| ≥ 90 % n (%)                                      | 151 (45)          | 34 (10)            |
| <b>Temps jusqu'à première réponse, RC + RP</b>    |                   |                    |
| Médiane (mois)                                    | 1,4               | 4,2                |
| Durée médiane <sup>a</sup> de la réponse (mois)   |                   |                    |
| RC <sup>c</sup>                                   | 24,0              | 12,8               |
| RC+RP <sup>f</sup>                                | 19,9              | 13,1               |
| <b>Temps jusqu'au traitement suivant</b>          |                   |                    |
| Événements n (%)                                  | 224 (65,1)        | 260 (76,9)         |
| Médiane <sup>a</sup> (mois)                       | 27,0              | 19,2               |
| (IC à 95 %)                                       | (24,7, 31,1)      | (17,0, 21,0)       |
| Risque relatif <sup>b</sup>                       |                   | 0,557              |
| (IC à 95 %)                                       |                   | (0,462, 0,671)     |

valeur de p<sup>c</sup> < 0,000001

- a Estimation de Kaplan-Meier.  
b Le risque relatif a été estimé selon un modèle des risques proportionnels de Cox, ajusté sur des facteurs de stratification: β<sub>1</sub>-microglobuline, albumine et région géographique. Un risque relatif inférieur à 1 indique un avantage pour le VMP.  
c Valeur nominale de p calculée selon le test de log-rank, ajusté sur des facteurs de stratification: à savoir β<sub>1</sub>-microglobuline, albumine et région géographique.  
d Valeur de p pour le taux de réponse (RC+RP) selon le test du Chi-deux de Cochran-Mantel-Haenszel, ajusté sur les facteurs de stratification.  
e La population évaluable pour la réponse inclut les patients avec une maladie initiale mesurable.  
f RC = Réponse Complète; RP = Réponse Partielle. Critères EBMT.  
g Tous les patients randomisés ayant un myélogène sécrétant.  
h Actualisation des données de survie sur la base d'une durée médiane de suivi de 60,1 mois.  
IC = Intervalle de Confiance

**Patients éligibles à la greffe de cellules souches**  
Deux essais de phase III, multicentriques, en ouvert, randomisés (IFM-2005-01, MMY-3010) ont été conduits afin de démontrer la tolérance et l'efficacité de VELCADE, en double et triple associations avec d'autres agents chimiothérapeutiques, comme traitement d'induction avant la greffe de cellules souches chez les patients atteints de myélome multiple non traité au préalable.

Dans l'étude IFM-2005-01, VELCADE associé à la dexaméthasone [VcDx, n = 240] a été comparé à la vincristine-doxorubicine-dexaméthasone [VDDx, n = 242]. Les patients du bras VcDx ont reçu quatre cycles de 21 jours, comprenant chacun VELCADE (1,3 mg/m<sup>2</sup> administré par voie intraveineuse deux fois par semaine les jours 1, 4, 8 et 11) et dexaméthasone orale (40 mg/jour les jours 1 à 4 et les jours 9 à 12 au cours des cycles 1 et 2, et les jours 1 à 4 au cours des cycles 3 et 4). Les auto-greffes de cellules souches ont été reçues par 198 (82 %) patients et 208 (87 %) patients des bras VDDx et VcDx respectivement; la majorité des patients n'ont subi qu'une seule greffe. Les caractéristiques démographiques des patients et de la maladie à l'inclusion étaient similaires entre les bras de traitement. L'âge médian des patients dans l'étude était de 57 ans, 55 % étaient des hommes et 48 % des patients étaient à haut risque cytogénétique. La durée médiane de traitement était de 13 semaines pour le bras VDDx et de 11 semaines pour le bras VcDx. Le nombre médian de cycles reçus par les deux bras était de 4 cycles.  
Le critère principal d'efficacité de l'étude était le taux de réponse post-induction (RC+nRC). Une différence statistiquement significative de RC+nRC a été observée en faveur du bras VELCADE associé à la dexaméthasone. Les critères d'efficacité secondaires incluaient les taux de réponse post-greffe (RC+nRC, RC+nRC+TBRP+RP), la survie sans progression et la survie globale. Les principaux résultats d'efficacité sont présentés dans le Tableau 12.

| Critères                                   | VcDx<br>N = 240 (population ITT) | VDDx<br>N = 242 (population ITT) | OR; IC à 95 %; valeur de p <sup>a</sup> |
|--------------------------------------------|----------------------------------|----------------------------------|-----------------------------------------|
| <b>IFM-2005-01</b>                         |                                  |                                  |                                         |
| Taux de réponse (Post-induction)           |                                  |                                  |                                         |
| *RC+nRC                                    | 14,6 (10,4, 19,7)                | 6,2 (3,5, 10,0)                  | 2,58 (1,37, 4,85); 0,003                |
| RC+nRC+TBRP+RP % (IC à 95 %)               | 77,1 (71,2, 82,2)                | 60,7 (54,3, 66,9)                | 2,18 (1,46, 3,24); <0,001               |
| Taux de réponse (Post-greffe) <sup>b</sup> |                                  |                                  |                                         |
| RC+nRC                                     | 37,5 (31,4, 44,0)                | 23,1 (18,0, 29,0)                | 1,98 (1,33, 2,95); 0,001                |
| RC+nRC+TBRP+RP % (IC à 95 %)               | 79,6 (73,9, 84,5)                | 74,4 (68,4, 79,8)                | 1,34 (0,87, 2,05); 0,179                |

Dans l'étude de phase III, le traitement par VELCADE a conduit à un temps sans progression significativement plus long, une survie significativement prolongée et un taux de réponse significativement plus élevé comparé au traitement avec la dexaméthasone (voir Tableau 14), chez tous les patients, aussi bien chez ceux qui ont reçu une seule ligne de traitement antérieur. Selon les résultats de l'analyse intermédiaire prévue, le bras dexaméthasone a été suspendu sur la recommandation du comité de surveillance des données et tous les patients randomisés à la dexaméthasone ont alors reçu VELCADE quel que soit le stade de la maladie. Du fait de ce changement précoce, la durée médiane de suivi des patients survivants est de 8,3 mois. A la fois chez les patients réfractaires à leur dernier traitement antérieur et ceux qui étaient non réfractaires, la survie globale était significativement plus longue et le taux de réponse était significativement plus important dans le bras VELCADE.

Parmi les 669 patients inclus, 245 (37 %) avaient 65 ans ou plus. Les paramètres de réponse comme le temps sans progression ont restés significativement meilleurs pour VELCADE indépendamment de l'âge. Quel que soit le taux initial de  $\beta_2$ -microglobuline, tous les paramètres d'efficacité (temps sans progression, survie globale et le taux de réponse) étaient significativement améliorés dans le bras VELCADE.

Dans la population réfractaire de l'étude de phase II, les réponses ont été revues par un comité indépendant et les critères de réponse ont été ceux de l'EBMT (European Bone Marrow Transplant Group). La survie médiane de tous les patients inclus a été de 17 mois (intervalle: < 1 à + 36 mois). Cette survie a été supérieure à la survie médiane de six à neuf mois prévue par les investigateurs cliniques consultants pour une population similaire de patients. En analyse multivariée, le taux de réponse a été indépendant du type de myélome, du score de performances, de la délétion du chromosome 13 ou du nombre ou du type de traitements antérieurs. Les patients ayant reçu 2 à 3 lignes de traitements antérieurs ont présenté un taux de réponse de 32 % (10/32), et les patients ayant reçu plus de 7 lignes de traitements antérieurs ont eu un taux de réponse de 31 % (21/67).

Tableau 14: Résumé de l'évolution de la maladie des études de Phase II et de Phase III (APEX)

|                                | Phase III<br>Tous les patients                              |                                                             | Phase III<br>1 ligne de traitement<br>antérieure            |                                                              | Phase III<br>> 1 ligne de<br>traitement<br>antérieure       |                                                            | Phase II<br>≥ 2 lignes<br>antérieures          |                                                                          |
|--------------------------------|-------------------------------------------------------------|-------------------------------------------------------------|-------------------------------------------------------------|--------------------------------------------------------------|-------------------------------------------------------------|------------------------------------------------------------|------------------------------------------------|--------------------------------------------------------------------------|
|                                | Vc<br>n = 333 <sup>a</sup><br>189 <sup>b</sup><br>[148,211] | Dex<br>n = 336 <sup>a</sup><br>106 <sup>b</sup><br>[86,128] | Vc<br>n = 132 <sup>a</sup><br>212 <sup>d</sup><br>[188,267] | Dex<br>n = 119 <sup>a</sup><br>169 <sup>a</sup><br>[105,191] | Vc<br>n = 200 <sup>a</sup><br>148 <sup>b</sup><br>[129,192] | Dex<br>n = 217 <sup>a</sup><br>87 <sup>b</sup><br>[84,107] | Vc<br>n = 202 <sup>a</sup><br>210<br>[154,281] | Vc<br>n = 193<br>(4)**<br>(10)**<br>(27)**<br>(35)**<br>385 <sup>a</sup> |
| Événements liés<br>au temps    |                                                             |                                                             |                                                             |                                                              |                                                             |                                                            |                                                |                                                                          |
| TTP, jours                     |                                                             |                                                             |                                                             |                                                              |                                                             |                                                            |                                                |                                                                          |
| Survie à un<br>an, % [95 % IC] | 80 <sup>a</sup><br>[74,85]                                  | 66 <sup>a</sup><br>[59,72]                                  | 89 <sup>a</sup><br>[82,95]                                  | 72 <sup>a</sup><br>[62,83]                                   | 73<br>[64,82]                                               | 62<br>[53,71]                                              | 60                                             |                                                                          |
| Meilleure<br>réponse (%)       |                                                             |                                                             |                                                             |                                                              |                                                             |                                                            |                                                |                                                                          |
| RC                             | n = 315 <sup>c</sup><br>20 (6) <sup>b</sup>                 | n = 312 <sup>c</sup><br>2 (< 1) <sup>b</sup>                | n = 128<br>8 (6)                                            | n = 110<br>2 (2)                                             | n = 187<br>12 (6)                                           | n = 202<br>0 (0)                                           | n = 193<br>(4)**                               |                                                                          |
| RC+nRC                         | 41 (13) <sup>b</sup>                                        | 5 (2) <sup>b</sup>                                          | 16 (13)                                                     | 4 (4)                                                        | 25 (13)                                                     | 1 (< 1)                                                    | (10)**                                         |                                                                          |
| RC+nRC+RP                      | 121 (38) <sup>b</sup>                                       | 56 (18) <sup>b</sup>                                        | 57 (45) <sup>a</sup>                                        | 29 (26) <sup>a</sup>                                         | 64 (34) <sup>b</sup>                                        | 27 (13) <sup>b</sup>                                       | (27)**                                         |                                                                          |
| RC+nRC+RP+MR                   | 146 (46)                                                    | 108 (35)                                                    | 66 (52)                                                     | 45 (41)                                                      | 80 (43)                                                     | 63 (31)                                                    | (35)**                                         |                                                                          |
| Durée médiane<br>Jours (mois)  | 242 (8,0)                                                   | 169 (5,6)                                                   | 246 (8,1)                                                   | 189 (6,2)                                                    | 238 (7,8)                                                   | 126 (4,1)                                                  | 385 <sup>a</sup>                               |                                                                          |

IC = intervalle de confiance; RC = réponse complète; nRC = réponse presque complète; ITT = intention de traiter; Vc = VELCADE; VcDx = VELCADE, dexaméthasone; VDDx = vincristine, doxorubicine, dexaméthasone; TBR = très bonne réponse partielle; RP = réponse partielle; OR = odds ratio.

<sup>a</sup> Critère principal  
OR pour les taux de réponse selon les estimations de odds ratio de Mantel-Haenszel pour les tableaux stratifiés; valeurs de p selon le test de Cochran Mantel-Haenszel.  
<sup>b</sup> Correspond au taux de réponse après une seconde greffe chez les patients ayant reçu une seconde greffe (42/240 [18 %] dans le bras VcDx et 52/242 [21 %] dans le bras VDDx).  
Note: Un OR > 1 indique un avantage pour le traitement d'induction comprenant Vc.

Dans l'étude MMY-3010, le traitement d'induction par VELCADE associé au thalidomide et à la dexaméthasone [VcTDx, n = 130] a été comparé au thalidomide-dexaméthasone [TDx, n = 127]. Les patients du bras VcTDx ont reçu six cycles de 4 semaines, comprenant chacun VELCADE (1,3 mg/m<sup>2</sup> administré deux fois par semaine les jours 1, 4, 8 et 11, suivie d'une période de 17 jours sans traitement des jours 12 à 28), dexaméthasone (40 mg administré par voie orale les jours 1 à 4 et les jours 8 à 11) et thalidomide (administré par voie orale à la dose quotidienne de 50 mg les jours 1 à 14, augmentée à 100 mg les jours 15 à 28 puis ensuite à 200 mg quotidiennement). Une seule auto-greffe de cellules souches a été reçue par 105 (81 %) patients et 78 (61 %) patients des bras VcTDx et TDx respectivement. Les caractéristiques démographiques des patients et de la maladie à l'inclusion étaient similaires entre les bras de traitement. Les patients des bras VcTDx et TDx avaient respectivement un âge médian de 57 versus 56 ans, 99 % versus 98 % étaient caucasiens, et 58 % versus 54 % étaient des hommes. Dans le bras VcTDx, 12 % des patients étaient classés à haut risque cytogénétique versus 16 % dans le bras TDx. La durée médiane du traitement était de 24,0 semaines et le nombre médian de cycles de traitement reçus était de 6,0, et était cohérent entre les bras de traitement.

Les critères principaux d'efficacité de l'étude étaient les taux de réponse post-induction et post-greffe (RC+nRC). Une différence statistiquement significative de RC+nRC a été observée en faveur du bras VELCADE associé à la dexaméthasone et au thalidomide. Les critères d'efficacité secondaires incluaient la survie sans progression et la survie globale. Les principaux résultats d'efficacité sont présentés dans le Tableau 13.

Tableau 13: Résultats d'efficacité de l'étude MMY-3010

| Critères                             | VcTDx                       | TDx                         | OR: IC à 95 %; Valeur de p <sup>a</sup> |
|--------------------------------------|-----------------------------|-----------------------------|-----------------------------------------|
| MMY-3010                             | N = 130<br>(population ITT) | N = 127<br>(population ITT) |                                         |
| *Taux de réponse<br>(Post-induction) |                             |                             |                                         |
| RC+nRC                               | 49,2 (40,4, 58,1)           | 17,3 (11,2, 25,0)           | 4,63 (2,61, 8,22); < 0,001 <sup>a</sup> |
| RC+nRC+RP % (IC à 95 %)              | 84,6 (77,2, 90,3)           | 61,4 (52,4, 69,9)           | 3,46 (1,90, 6,27); < 0,001 <sup>a</sup> |
| * Taux de réponse (Post-greffe)      |                             |                             |                                         |
| RC+nRC                               | 55,4 (46,4, 64,1)           | 34,6 (26,4, 43,6)           | 2,34 (1,42, 3,87); 0,001 <sup>a</sup>   |
| RC+nRC+RP % (IC à 95 %)              | 77,7 (69,6, 84,5)           | 56,7 (47,6, 65,5)           | 2,66 (1,55, 4,57); < 0,001 <sup>a</sup> |

IC = intervalle de confiance; RC = réponse complète; nRC = réponse presque complète; ITT = intention de traiter; Vc = VELCADE; VcTDx = VELCADE, thalidomide, dexaméthasone; TDx = thalidomide, dexaméthasone; RP = réponse partielle; OR = odds ratio

<sup>a</sup> Critère principal  
OR pour les taux de réponse selon les estimations de odds ratio de Mantel-Haenszel pour les tableaux stratifiés; valeurs de p selon le test de Cochran Mantel-Haenszel.  
Note: Un OR > 1 indique un avantage pour le traitement d'induction comprenant Vc.

Efficacité clinique dans le myélome multiple en rechute ou réfractaire  
La tolérance et l'efficacité de VELCADE (injecté par voie intraveineuse) ont été évaluées dans 2 études à la dose recommandée de 1,3 mg/m<sup>2</sup>: une étude de phase III (APEX), randomisée, comparative, versus dexaméthasone (Dex), portant sur 669 patients atteints d'un myélome multiple en rechute ou réfractaire, ayant reçu 1 à 3 lignes de traitements antérieurs, et une étude de phase II à bras unique, portant sur 202 patients atteints de myélome multiple en rechute et réfractaire, ayant reçu au moins 2 lignes de traitements antérieurs et présentant une progression au cours de leur dernier traitement.

| Délais de réponse RC+RP (jours) | 43 | 43 | 44 | 46 | 41 | 27 | 38 |
|---------------------------------|----|----|----|----|----|----|----|
|---------------------------------|----|----|----|----|----|----|----|

- a Population en intention de traiter (ITT)
- b Valeur de p issue du test de log-rank stratifié; l'analyse par ligne de traitement exclut la stratification de l'historique des traitements reçus;  $p < 0,0001$
- c La population des répondants inclut les patients qui avaient une tumeur mesurable à l'inclusion et avaient reçu au moins une dose du médicament de l'étude.
- d La valeur de p selon le test du Chi deux de Cochran-Mantel-Haenszel ajusté, pour les facteurs de stratification;
- e l'analyse par ligne de traitement exclut la stratification de l'historique des traitements reçus
- \* RC+PR-MR \*\*RC = RC. (IF-); nRC = RC(IF+)
- NA = non applicable, NE = non estimé
- ITT = Temps jusqu'à progression
- IC = Intervalle de Confiance
- Vc = VELCADE; Dex = dexaméthasone
- RC = Réponse Complète; nRC = Réponse Presque Complète
- RP = Réponse Partielle; MR = Réponse Minimale

Dans l'étude de phase II, les patients qui n'ont pas obtenu une réponse optimale au traitement par VELCADE en monothérapie ont pu recevoir des doses élevées de dexaméthasone en association avec VELCADE. Le protocole a permis aux patients de recevoir de la dexaméthasone s'ils avaient eu une réponse qui n'était pas optimale sous VELCADE seul. Au total, 74 patients évaluable ont reçu de la dexaméthasone en association avec VELCADE. Dix huit pour cent des patients ont répondu ou ont présenté une réponse améliorée [RM (11 %) ou RP (7 %)] avec l'association des traitements.

#### *Traitement par VELCADE en association à la doxorubicine liposomale pegylée (étude DOXIL-MMY-3001)*

Une étude de phase III, multicentrique, en ouvert, randomisée, en groupes parallèles a été conduite chez 646 patients afin de comparer la sécurité et l'efficacité de VELCADE + doxorubicine liposomale pegylée versus VELCADE en monothérapie chez les patients atteints de myélome multiple ayant reçu au moins 1 traitement antérieur et n'ayant pas progressé sous un traitement à base d'anthracycline. Le critère principal d'efficacité était le temps jusqu'à progression et les critères secondaires d'efficacité étaient la survie globale et le taux de réponse globale (RC + RP) selon les critères de l'EBMT (European Group for Blood and Marrow Transplantation).

Une analyse intermédiaire prévue par le protocole (basée sur 249 événements de temps jusqu'à progression) a déclenché l'arrêt précoce de l'étude, l'efficacité ayant été démontrée. Cette analyse intermédiaire a montré une réduction du risque de 45 % sur le critère de temps jusqu'à progression (IC à 95 %, 29-57 %,  $p < 0,0001$ ) chez les patients traités par VELCADE en association à la doxorubicine liposomale pegylée. Le temps jusqu'à progression médian était de 6,5 mois pour les patients traités par VELCADE en monothérapie comparé à 9,3 mois pour les patients traités par VELCADE en association à la doxorubicine liposomale pegylée. Ces résultats, bien que précoces, ont constitué l'analyse finale prévue par le protocole.

L'analyse finale de la survie globale réalisée après une durée médiane de suivi de 8,6 ans n'a montré aucune différence significative en termes de survie globale entre les deux bras de traitement. La médiane de survie globale était de 30,8 mois (IC à 95 % ; 25,2-36,5 mois) chez les patients traités par VELCADE en monothérapie et de 33,0 mois (IC à 95 % ; 28,9-37,1 mois) chez les patients traités par l'association VELCADE + doxorubicine liposomale pegylée.

#### *Traitement par VELCADE en association à la dexaméthasone*

En l'absence de comparaison directe entre VELCADE et VELCADE associé à la dexaméthasone chez les patients atteints de myélome multiple en progression, une analyse statistique sur données appariées a été conduite pour comparer les résultats du bras non randomisé de VELCADE associé à la dexaméthasone (étude MMY-2045 en ouvert de phase II) aux résultats obtenus dans les bras de VELCADE en monothérapie dans différentes études randomisées de phase III (M34101-039 [APEX] et DOXIL-MMY-3001) conduites dans la même indication.

L'analyse sur données appariées est une méthode statistique dans laquelle les patients du groupe de traitement (par exemple, VELCADE en association à la dexaméthasone) et les patients du groupe comparateur (par exemple, VELCADE) sont rendus comparables en tenant compte des facteurs de confusion et en appariant individuellement les sujets de l'étude. Ceci minimise les effets des facteurs de confusion observés lors de l'estimation des effets du traitement avec des données non-randomisées.

Cent vingt-sept paires de patients ont été identifiées. L'analyse a montré une amélioration du taux de réponse globale (RC+RP) (Odds ratio 3,769; IC à 95 % 2,045-6,947;  $p < 0,001$ ), de la survie sans progression (hazard ratio 0,511; IC à 95 % 0,309-0,845;  $p = 0,008$ ) et du temps jusqu'à progression (hazard ratio 0,385; IC à 95 % 0,212-0,698;  $p = 0,001$ ) pour VELCADE associé à la dexaméthasone comparé à VELCADE en monothérapie.

Les données disponibles concernant le retraitement par VELCADE du myélome multiple en rechute sont limitées.

L'étude de phase II MMY-2036 (RETRIEVE), en ouvert, à bras unique a été conduite pour déterminer l'efficacité et la tolérance d'un retraitement par VELCADE. Cent trente patients ( $\geq 18$  ans) atteints d'un myélome multiple, ayant eu précédemment au moins une réponse partielle avec un traitement comprenant VELCADE, ont été retraités dès progression. Au moins 6 mois après le traitement précédent, VELCADE a été initié à la dernière dose tolérée, de 1,3 mg/m<sup>2</sup> (n = 93) ou  $\leq 1,0$  mg/m<sup>2</sup> (n = 37), et a été administré les jours 1, 4, 8 et 11 toutes les 3 semaines pendant 8 cycles au maximum. La dexaméthasone a été administrée en association à la dexaméthasone conformément au standard de traitement.

Les patients supplémentaires au cours des cycles de retraitement par VELCADE. Le critère primaire était la meilleure réponse confirmée au retraitement évaluée selon les critères de l'EBMT. Le meilleur taux de réponse globale (CR+PR) au retraitement chez 130 patients était de 38,5 % (IC à 95 % : 30,1 ; 47,4).

#### Efficacité clinique dans le lymphome à cellules du manteau (LCM) non traité au préalable

L'étude LYM-3002 était une étude de phase III, randomisée, en ouvert comparant l'efficacité et la sécurité de l'association VELCADE, rituximab, cyclophosphamide, doxorubicine et prednisone (VcR-CAP; n = 243) à celles de l'association rituximab, cyclophosphamide, doxorubicine, vincristine et prednisone (R-CHOP ; n = 244) chez les patients adultes atteints d'un LCM non traité au préalable (Stade II, III ou IV). Les patients du bras de traitement VcR-CAP ont reçu VELCADE (1,3 mg/m<sup>2</sup>; les jours 1, 4, 8, 11, période d'arrêt du traitement les jours 12 à 21), rituximab 375 mg/m<sup>2</sup> IV au jour 1 ; cyclophosphamide 750 mg/m<sup>2</sup> IV au jour 1 ; doxorubicine 50 mg/m<sup>2</sup> IV au jour 1 et prednisone 100 mg/m<sup>2</sup> par voie orale les jours 1 à 5 d'un cycle de traitement par VELCADE de 21 jours. Pour les patients ayant une première réponse documentée au cycle 6, deux cycles de traitement supplémentaires ont été administrés.

Le critère principal d'efficacité était la survie sans progression basée sur l'évaluation d'un Comité de Revue Indépendant (IRC). Les critères secondaires incluaient le temps jusqu'à progression (TTP), le temps jusqu'au prochain traitement contre le lymphome (TNT), la durée de l'intervalle sans traitement (TFT), le taux de réponse globale (ORR) et le taux de réponse complète (RC/RCu). La survie globale (OS) et la durée de la réponse.

Les caractéristiques démographiques de la maladie à l'inclusion étaient généralement bien équilibrées entre les deux bras de traitement. L'âge médian des patients était de 66 ans, 74 % étaient des hommes, 66 % étaient caucasiens et 32 % asiatiques, 69 % des patients avaient une analyse de la ponction et/ou de la biopsie de la moelle osseuse positive pour le LCM, 54 % des patients avaient un score IPI (International Prognostic Index)  $\geq 3$  et 76 % avaient une maladie de stade IV. La durée du traitement (médiane = 17 semaines) et la durée du suivi (médiane = 40 mois) étaient comparables entre les deux bras de traitement. Une médiane de 6 cycles a été reçue par les patients dans les deux bras de traitement, 14 % des sujets du bras VcR-CAP et 17 % des patients du bras R-CHOP ayant reçu 2 cycles supplémentaires. La majorité des patients des deux bras ont terminé le traitement, 80 % dans le bras VcR-CAP et 82 % dans le bras R-CHOP. Les résultats d'efficacité sont présentés dans le Tableau 15.

Tableau 15: Résultats d'efficacité de l'étude LYM-3002

| Critère d'efficacité                       | VcR-CAP            | R-CHOP                                         |
|--------------------------------------------|--------------------|------------------------------------------------|
| n. patients en ITT                         | 243                | 244                                            |
| Survie sans progression (IRC) <sup>a</sup> | 133 (54,7 %)       | 165 (67,6 %)                                   |
| Evénements n (%)                           | 24,7 (19,8 ; 31,8) | 14,4 (12 ; 16,9)                               |
| Médiane <sup>c</sup> (IC à 95 %) (mois)    |                    |                                                |
|                                            |                    | HR <sup>b</sup> (IC à 95 %) = 0,63 (0,50,0,79) |
|                                            |                    | valeur de p <sup>d</sup> < 0,001               |

| Taux de réponse                         | 229          | 228          |
|-----------------------------------------|--------------|--------------|
| n: patients avec une réponse évaluable  | 122 (53,3 %) | 95 (41,7 %)  |
| Réponse complète globale (CR+CRu)/ n(%) | 211 (92,1 %) | 204 (89,5 %) |
| Réponse globale (CR+CRu+PR)/ n(%)       | 272          | 272          |

- a Sur la base de l'évaluation (données radiologiques uniquement) d'un Comité de Revue Indépendant (IRC).
- b Hazard ratio estimé sur la base d'un modèle de Cox stratifié par le risque IP1 et le stade de la maladie. Un hazard ratio < 1 indique un avantage pour VCr-CAP.
- c Sur la base des estimations de Kaplan-Meier.
- d Sur la base du test de log-rank stratifié par le risque IP1 et le stade de la maladie.
- e L'estimation de l'odds ratio de Mannel-Haenszel pour les tableaux stratifiés est utilisée, avec comme facteurs de stratification le risque IP1 et le stade de la maladie. Un odds ratio (OR) > 1 indique un avantage pour VCr-CAP.
- f Inclut toutes les CR + CRu, évaluées par l'IRC, avec une vérification de la moelle osseuse et du taux de LDH.
- g Valeur de p selon le test du Chi-deux de Cochran-Mantel-Haenszel, avec le score IP1 et le stade de la maladie comme facteurs de stratification.
- h Inclut toutes les CR+CRu+PR, confirmées par radiologie et revues par l'IRC, indépendamment de la vérification de la moelle osseuse et du taux de LDH.
- CR = Réponse Complète; CRu = Réponse complète non confirmée; PR = Réponse partielle; IC = Intervalle de confiance; HR = Hazard Ratio; OR = Odds Ratio; ITT = Intention de traiter

La médiane de la survie sans progression, évaluée par l'investigateur, était de 30,7 mois dans le bras VCr-CAP et de 16,1 mois dans le bras R-CHOP (Hazard Ratio [HR] = 0,51 ;  $p < 0,001$ ). Un bénéfice statistiquement significatif ( $p < 0,001$ ) en faveur du bras VCr-CAP comparé au bras R-CHOP a été observé pour le TTP (médiane de 30,5 mois versus 16,1 mois), le TNI (médiane de 44,5 mois versus 24,8 mois) et le TFI (médiane de 40,6 mois versus 20,5 mois). La durée médiane de la réponse complète était de 42,1 mois dans le bras VCr-CAP contre 18 mois dans le bras R-CHOP. La durée de la réponse globale était plus longue de 21,4 mois dans le bras VCr-CAP (médiane de 36,5 mois versus 15,1 mois dans le bras R-CHOP). Avec une durée médiane de suivi de 40 mois, la survie globale médiane (56,3 mois dans le bras R-CHOP et non atteinte dans le bras VCr-CAP) était en faveur du bras VCr-CAP (HR estimé = 0,80 ;  $p = 0,173$ ). La survie globale avait tendance à être prolongée dans le bras VCr-CAP : le taux de survie estimé à 4 ans était de 53,9 % dans le bras R-CHOP et de 64,4 % dans le bras VCr-CAP.

Patients précédemment traités pour une amylose à chaîne légère (AL)

Une étude en ouvert, non randomisée de Phase III a été conduite afin de déterminer la sécurité et l'efficacité de VELCADE chez des patients précédemment traités pour une amylose à chaîne légère. Aucune nouvelle crainte concernant la sécurité n'a été observée pendant l'étude, et en particulier VELCADE n'a pas aggravé les lésions des organes cibles (cœur, rein et foie). Lors d'une analyse exploratoire d'efficacité, un taux de réponse de 67,3 % (incluant un taux de RC de 28,6 %), mesuré par la réponse hématologique (Protéine-M), a été rapporté chez 49 patients évaluable traités par les doses maximales autorisées de 1,6 mg/m<sup>2</sup> par semaine et 1,3 mg/m<sup>2</sup> deux fois par semaine. Pour ces cohortes de posologie, le taux de survie combiné à un an était de 88,1 %.

Population pédiatrique

L'Agence européenne des médicaments a accordé une dérogation à l'obligation de soumettre les résultats d'études réalisées avec VELCADE dans tous les sous-groupes de la population pédiatrique dans le myélome multiple et dans le lymphome à cellules du manteau (voir rubrique 4.2 pour les informations concernant l'usage pédiatrique).

Un essai d'efficacité, de sécurité et de pharmacocinétique, de phase II, à bras unique, a été conduit par le « Children's Oncology Group » afin d'évaluer l'activité de l'ajout du bortézomib à une polychimiothérapie de réinduction chez les enfants et les jeunes adultes atteints d'hémopathies malignes lymphoïdes (leucémie aiguë lymphoblastique [LAL] pré-B, LAL de la lignée T et lymphome lymphoblastique à cellules T). Un protocole efficace de polychimiothérapie de réinduction a été administré au cours de 3 blocs. VELCADE a été administré seulement dans les blocs 1 et 2 afin

d'éviter une potentielle accumulation des toxicités avec les médicaments co-administrés dans le bloc 3.

La réponse complète (RC) a été évaluée après la fin du bloc 1. Chez les patients en recrudescence d'une LAL de la lignée B dans les 18 mois suivant le diagnostic (n = 27), le taux de RC était de 67 % (IC à 95 % : 46, 84) ; le taux de survie sans événement à 4 mois était de 44 % (IC à 95 % : 26, 62). Chez les patients en recrudescence d'une LAL de la lignée B dans les 18 à 36 mois après le diagnostic (n = 33), le taux de RC était de 79 % (IC à 95 % : 61, 91) et le taux de survie sans événement à 4 mois était de 73 % (IC à 95 % : 54, 85). Le taux de RC chez les patients en première recrudescence d'une LAL de la lignée T (n = 22) était de 68 % (IC à 95 % : 45, 86) et le taux de survie sans événement à 4 mois était de 67 % (IC à 95 % : 42, 83). Les données d'efficacité rapportées sont considérées peu concluantes (voir rubrique 4.2).

140 patients avec une LAL ou un lymphome lymphoblastique ont participé à l'étude et ont fait l'objet d'une évaluation concernant la sécurité ; l'âge médian était de 10 ans (intervalle allant de 1 à 26). Aucun nouveau problème de sécurité n'a été observé quand VELCADE a été ajouté au traitement de chimiothérapie standard de la LAL pré-B chez l'enfant. Les effets indésirables suivants (grade ≥ 3) ont été observés avec une fréquence plus élevée dans le protocole de traitement contenant VELCADE comparé à l'étude contrôle historique dans laquelle le protocole de référence était donné seul : dans le bloc 1, neuropathie périphérique sensitive (3 % versus 0 %) ; iléus (2,1 % versus 0 %) ; hypoxie (8 % versus 2 %). Aucune information sur de possibles séquelles ou sur les taux de résolution de neuropathies périphériques ne sont disponibles dans cette étude. Des fréquences plus élevées ont également été observées concernant les infections associées à une neutropénie de grade ≥ 3 (24 % versus 19 % dans le bloc 1 et 22 % versus 11 % dans le bloc 2), l'augmentation du taux d'ALAT (17 % versus 8 % dans le bloc 2), l'hypokaliémie (18 % versus 6 % dans le bloc 1 et 21 % versus 12 % dans le bloc 2) et l'hyponatémie (12 % versus 5 % dans le bloc 1 et 4 % versus 0 dans le bloc 2).

## 5.2 Propriétés pharmacocinétiques

Absorption

Après administration en bolus intraveineux d'une dose de 1,0 mg/m<sup>2</sup> et 1,3 mg/m<sup>2</sup> à 11 patients ayant un myélome multiple et une clairance de la créatinine supérieure à 50 ml/min, les pics plasmatiques moyens après la première injection de bortézomib étaient de 57 et 112 ng/ml respectivement. Après les injections suivantes, les pics plasmatiques moyens observés variaient de 67 à 106 ng/ml à la dose de 1,0 mg/m<sup>2</sup> et de 89 à 120 ng/ml à la dose de 1,3 mg/m<sup>2</sup>.

Distribution

Le volume de distribution moyen (V<sub>d</sub>) du bortézomib variait de 1659 l à 3294 l après une injection unique ou des injections répétées par voie intraveineuse de 1,0 mg/m<sup>2</sup> ou 1,3 mg/m<sup>2</sup> chez des patients ayant un myélome multiple. Ceci suggère que le bortézomib se distribue largement dans les tissus périphériques. Sur un intervalle de concentrations de bortézomib compris entre 0,01 et 1,0 µg/ml, la liaison aux protéines *in vitro* atteignait en moyenne 82,9 % dans le plasma humain. Le pourcentage de bortézomib lié aux protéines plasmatiques n'était pas concentration-dépendant.

Biotransformation

Des études *in vitro* sur des microsomes hépatiques humains et sur des iso-enzymes du cytochrome P450 issus de l'ADNc humain indiquent que le bortézomib est métabolisé principalement par les voies oxydatives via les enzymes du cytochrome P450, 3A4, 2C19 et 1A2. La voie métabolique principale est la déboronation pour former deux métabolites déboronés qui subissent ensuite une hydroxylation en plusieurs métabolites. Les métabolites déboronés du bortézomib sont inactifs en tant qu'inhibiteur du protéasome 26S.

Élimination

La demi-vie d'élimination (t<sub>1/2</sub>) moyenne du bortézomib après administrations multiples varié de 40 à 193 heures. Le bortézomib est éliminé plus rapidement après la première injection par rapport aux injections suivantes. Les moyennes de clairance corporelle totale étaient de 102 et 112 l/h après la première injection pour des doses de 1,0 mg/m<sup>2</sup> et 1,3 mg/m<sup>2</sup> respectivement et variaient de 15 à 32 l/h

et de 18 à 32 l/h après les injections suivantes pour des doses de 1,0 mg/m<sup>2</sup> et 1,3 mg/m<sup>2</sup> respectivement.

#### Populations particulières

##### Insuffisance hépatique

L'effet d'une insuffisance hépatique sur la pharmacocinétique du bortézomib a été évalué au cours d'une étude de phase I pendant le premier cycle de traitement, incluant 61 patients atteints principalement de tumeurs solides et présentant des degrés variables d'insuffisance hépatique, traités à des doses de bortézomib allant de 0,5 à 1,3 mg/m<sup>2</sup>.

En comparaison avec les patients présentant une fonction hépatique normale, une insuffisance hépatique légère n'a pas entraîné d'altération de l'ASC du bortézomib normalisée en fonction de la dose. Cependant, les valeurs moyennes de l'ASC normalisée en fonction de la dose ont été augmentées d'environ 60 % chez les patients présentant une insuffisance hépatique modérée ou sévère. Une dose initiale plus faible est recommandée chez les patients souffrant d'insuffisance hépatique modérée ou sévère, et ceux-ci doivent être étroitement surveillés (voir rubrique 4.2, Tableau 6).

##### Insuffisance rénale

Une étude pharmacocinétique a été menée chez des patients présentant divers degrés d'insuffisance rénale classés en fonction de leurs valeurs de la clairance de la créatinine (CLCr) dans les groupes suivants: normale (CLCr ≥ 60 ml/min/1,73 m<sup>2</sup>, n = 12), légère (CLCr = 40 à 59 ml/min/1,73 m<sup>2</sup>, n = 10), modérée (CLCr = 20 à 39 ml/min/1,73 m<sup>2</sup>, n = 9), et sévère (CLCr < 20 ml/min/1,73 m<sup>2</sup>, n = 3). Un groupe de patients dialysés ayant reçu des doses après la dialyse a également été inclus dans l'étude (n = 8). Les patients ont reçu par voie intraveineuse des doses de 0,7 à 1,3 mg/m<sup>2</sup> de VELCADE deux fois par semaine. L'exposition à VELCADE (dose normalisée ASC et C<sub>max</sub>) était comparable entre tous les groupes (voir rubrique 4.2).

##### Age

La pharmacocinétique du bortézomib a été caractérisée après l'administration par bolus intraveineux de doses de 1,3 mg/m<sup>2</sup>, 2 fois par semaine, chez 104 enfants (entre 2 et 16 ans) ayant une leucémie aiguë lymphoblastique (LAL) ou une leucémie aiguë myéloïde (LAM). D'après l'analyse pharmacocinétique de population, la clairance du bortézomib a augmenté en fonction de l'augmentation de la surface corporelle. La moyenne géométrique (% CV) de la clairance était de 7,79 (25 %) L/h/m<sup>2</sup>, le volume de distribution à l'état d'équilibre était de 834 (39 %) L/m<sup>2</sup> et la demi-vie d'élimination était de 100 (44 %) heures. Après correction de l'effet de la surface corporelle, les autres données démographiques telles que l'âge, le poids et le sexe n'ont pas eu d'effets cliniques significatifs sur la clairance du bortézomib. La clairance du bortézomib normalisée en fonction de la surface corporelle chez les enfants était similaire à celle observée chez les adultes.

#### 5.3 Données de sécurité préclinique

Le bortézomib était positif sur l'activité clastogène (aberrations chromosomiques structurales) dans le test d'aberrations chromosomiques *in vitro* utilisant des cellules d'ovaire de hamster chinois (CHO) à des concentrations aussi faibles que 3,125 µg/ml, qui était la plus faible concentration évaluée. Le bortézomib n'était pas génotoxique dans le test de mutagenicité *in vitro* (test d'Ames) et dans le test du micro-noyau *in vivo* chez la souris.

Les études de toxicité du développement chez le rat et le lapin ont montré une létalité embryofœtale à des doses toxiques chez la mère, mais aucune toxicité embryofœtale directe en dessous des doses toxiques chez la mère. Les études de fertilité n'ont pas été effectuées, mais l'évaluation des tissus reproducteurs a été réalisée dans les études de toxicité générale. Dans l'étude de 6 mois chez le rat, des effets dégénératifs sur les testicules et les ovaires ont été observés. Il est par conséquent vraisemblable que le bortézomib puisse avoir un effet potentiel sur la fertilité du mâle ou de la femelle. Des études de développement prénatal et postnatal n'ont pas été conduites.

Dans des études de toxicité générale conduites sur plusieurs cycles chez le rat et le singe, les principaux organes cibles incluaient le tractus gastro-intestinal, entraînant vomissements et/ou

diarrhée, les tissus hématopoïétiques et le système lymphatique, entraînant cytopénies dans le sang périphérique, atrophie du tissu lymphoïde et réduction du nombre des cellules hématopoïétiques de la moelle osseuse; des neuropathies périphériques (observée chez le singe, la souris et le chien) affectant les axones des nerfs sensitifs; et les reins (changements légers). Tous ces organes cibles ont montré une récupération partielle à complète après l'interruption du traitement.

Sur la base d'études animales, le passage du bortézomib à travers la barrière hémato-encéphalique, s'il existe, apparaît limité et la perturbation chez l'homme est inconnue.

Des études pharmacologiques de tolérance cardiovasculaire effectuées chez le singe et le chien ont montré que les doses intraveineuses approximativement égales à 2 à 3 fois les doses recommandées en clinique en mg/m<sup>2</sup> sont associées à une augmentation de la fréquence cardiaque, une diminution de la contractilité, une hypotension et la mort. Chez les chiens, la diminution de la contractilité cardiaque et l'hypotension ont répondu à une administration immédiate d'agents inotropes positifs ou vasopresseurs. De plus, dans les études chez le chien, une légère augmentation de l'intervalle QT corrigé a été observée.

## 6. DONNÉES PHARMACEUTIQUES

### 6.1 Liste des excipients

Mannitol (E 421)  
Azote.

### 6.2 Incompatibilités

Ce médicament ne doit pas être mélangé avec d'autres médicaments à l'exception de ceux mentionnés dans la rubrique 6.6.

### 6.3 Durée de conservation

Flacon non ouvert  
3 ans

#### Solution reconstituée

La solution reconstituée doit être utilisée immédiatement après sa préparation. En cas d'utilisation non immédiate, les durées et conditions de conservation avant utilisation relèvent de la seule responsabilité de l'utilisateur. Toutefois la stabilité physico-chimique de la solution reconstituée lors de l'utilisation a été démontrée pendant 8 heures à 25°C dans le flacon d'origine et/ou dans une seringue. La durée de conservation totale du médicament reconstitué ne doit pas dépasser 8 heures avant administration.

### 6.4 Précautions particulières de conservation

À conserver à une température ne dépassant pas 30°C.

Conserver le flacon dans l'emballage extérieur à l'abri de la lumière.

Pour les conditions de conservation du médicament après reconstitution, voir rubrique 6.3.

### 6.5 Nature et contenu de l'emballage extérieur

Flacon en verre de type 1 de 5 ml avec un bouchon gris en bromobutyle et une capsule d'aluminium, avec un capuchon vert contenant 1 mg de bortézomib.

Le flacon est contenu dans une plaquette transparente composée d'une case et d'un opercule. Chaque boîte contient 1 flacon à usage unique.

## 6.6 Précautions particulières d'élimination et manipulation

### Précautions générales

Le bortézomib est un agent cytotoxique. Par conséquent, des précautions doivent être prises au cours de la manipulation et la préparation de VELCADE. L'utilisation de gants et d'autres vêtements de protection pour prévenir un contact cutané est recommandée.

Une **technique aseptique** doit être strictement observée pendant la manipulation de VELCADE car aucun conservateur n'est présent.

Des cas mortels ont été rapportés suite à l'administration accidentelle de VELCADE par voie intrathécale. VELCADE 1 mg poudre pour solution injectable doit être utilisé par voie intraveineuse uniquement, alors que VELCADE 3,5 mg poudre pour solution injectable peut être utilisé par voie intraveineuse ou sous-cutanée. VELCADE ne doit pas être administré par voie intrathécale.

### Instructions pour la reconstitution

VELCADE doit être reconstitué par un professionnel de santé.

Chaque flacon de 5 ml de VELCADE doit être reconstitué avec 1 ml d'une solution de chlorure de sodium injectable à 9 mg/ml (0,9 %), en utilisant une seringue de 1 ml, sans enlever le bouchon. La dissolution de la poudre lyophilisée est complète en moins de 2 minutes. Après reconstitution, chaque ml de solution contient 1 mg de bortézomib. La solution reconstituée est claire et incolore, avec un pH final de 4 à 7.

La solution reconstituée doit être inspectée visuellement pour vérifier l'absence de particules et d'un changement de couleur avant l'administration. Si un changement de couleur ou des particules sont observés, la solution reconstituée doit être éliminée.

### Élimination

VELCADE est à usage unique exclusivement.

Tout médicament non utilisé ou déchet doit être éliminé conformément à la réglementation en vigueur.

## 7. TITULAIRE DE L'AUTORISATION DE MISE SUR LE MARCHÉ

JANSSEN-CLAG INTERNATIONAL NV  
Turnhoutseweg 30  
B-2340 Beerse  
Belgique

## 8. NUMÉRO D'AUTORISATION DE MISE SUR LE MARCHÉ

EU/1/04/274/002

## 9. DATE DE PREMIÈRE AUTORISATION/DE RENOUVELLEMENT DE L'AUTORISATION

Date de la première autorisation: 21 avril 2008

Date du dernier renouvellement: 10 janvier 2014

## 10. DATE DE MISE À JOUR DU TEXTE



**SmPC Dexamethasone, NEODEX ®**

## RESUME DES CARACTERISTIQUES DU PRODUIT (RCP)

### 1. DENOMINATION DU MEDICAMENT

NEODEX® 40mg, comprimé sécable

### 2. COMPOSITION QUALITATIVE ET QUANTITATIVE

Chaque comprimé contient 44,30 mg d'acétate de dexaméthasone, correspondant à 40,00 mg de dexaméthasone base.

*Excipient(s)* : lactose

Pour la liste complète des excipients, voir chapitre 6.1.

### 3. FORME PHARMACEUTIQUE

Comprimé sécable blanc de forme oblongue.

### 4. DONNEES CLINIQUES

#### 4.1. Indications thérapeutiques

NEODEX® 40 mg est indiqué, chez l'adulte, en association, dans le traitement de certaines formes de myélome multiple, de lymphome et de leucémie aiguë lymphoblastique.

#### 4.2. Posologie et mode d'administration (adulte)

Voie orale

La posologie et le rythme d'administration varient en fonction du protocole thérapeutique et du (ou des) traitement(s) associé(s). Elle est en général de 20 à 40 mg/jour à prendre en une prise

#### 4.3. Contre-indications

Ce médicament est généralement contre-indiqué dans les situations suivantes (il n'existe toutefois aucune contre-indication absolue pour une corticothérapie d'indication vitale):

- tout état infectieux,
- certaines viroses en évolution (notamment hépatites, herpes, varicelle, zona),
- états psychotiques encore non contrôlés par un traitement,
- vaccins vivants,
- hypersensibilité à l'un des constituants.

#### 4.4. Mises en garde spéciales et précautions d'emploi

|                                                                                                                             |
|-----------------------------------------------------------------------------------------------------------------------------|
| NEODEX® est un glucocorticoïde fortement dosé. Il convient d'en tenir compte dans les modalités de surveillance du patient. |
|-----------------------------------------------------------------------------------------------------------------------------|

#### **Mises en garde**

##### *Risque infectieux*

La corticothérapie, notamment à forte dose, peut favoriser la survenue de diverses complications infectieuses dues notamment à des bactéries, des levures et des parasites. Ces infections éventuelles peuvent également être dues à des micro-organismes rarement à l'origine d'infections dans des circonstances normales (infections opportunistes).

La survenue d'une anguillulose maligne est un risque important. Tous les sujets venant d'une zone d'endémie (régions tropicale, subtropicale, sud de l'Europe) doivent avoir un examen parasitologique des selles et un traitement éradicateur systématique avant la corticothérapie.

Les signes évolutifs d'une infection peuvent être masqués par la corticothérapie.

Il importe, avant la mise en route du traitement, d'écartier toute possibilité de foyer infectieux, notamment tuberculeux, et de surveiller, en cours de traitement, l'apparition de pathologies infectieuses.

En cas de pathologie infectieuse évolutive, le traitement par NEODEX® doit s'accompagner d'une thérapie anti-infectieuse appropriée.

En cas de tuberculose ancienne, un traitement prophylactique anti-tuberculeux est nécessaire, s'il existe des séquelles radiologiques importantes et si l'on ne peut s'assurer qu'un traitement bien conduit de 6 mois par la rifampicine a été donné.

Certaines viroses (varicelle, rougeole) peuvent prendre une forme plus grave chez les patients traités par les glucocorticoïdes. Les personnes immunodéprimées n'ayant jamais eu la varicelle ou la rougeole sont particulièrement exposées. Si, pendant le traitement par NEODEX®, ces personnes ont un contact avec des individus ayant la varicelle ou la rougeole, un traitement préventif doit être instauré, le cas échéant.

#### *Troubles digestifs*

En cas d'ulcère gastro-duodéal, la corticothérapie n'est pas contre-indiquée si un traitement anti-ulcéreux est associé.

En cas d'antécédent ulcéreux, la corticothérapie peut être prescrite, avec une surveillance clinique et au besoin après fibroscopie.

L'emploi des corticoïdes nécessite une surveillance particulièrement adaptée, notamment chez les sujets âgés et en cas de colites ulcéreuses (risque de perforation), anastomoses intestinales récentes, insuffisance rénale, insuffisance hépatique, ostéoporose, myasthénie grave.

Les corticoïdes peuvent favoriser l'apparition de tendinopathie, voire de rupture tendineuse (exceptionnelle). Ce risque est augmenté lors de la co-prescription avec des fluoroquinolones et chez les patients dialysés avec hyperparathyroïdisme secondaire ou ayant subi une transplantation rénale.

Ce médicament est déconseillé en association avec le sultopride ou un vaccin vivant atténué (voir rubrique 4.5).

En raison de la présence de lactose, ce médicament est contre-indiqué en cas de galactosémie congénitale, de syndrome de malabsorption du glucose et du galactose ou de déficit en lactase.

#### **Précautions particulières d'emploi**

Au cours du traitement, il conviendra de surveiller la kaliémie, de s'assurer d'une supplémentation suffisante en potassium notamment en cas de risque de troubles du rythme ou d'associations à un traitement hypokaliémiant.

Une rétention hydrosodée est habituelle, responsable en partie d'une élévation éventuelle de la pression artérielle. Il convient donc de réduire l'apport sodé et de surveiller régulièrement la pression artérielle.

Lorsque la corticothérapie est indispensable, le diabète et l'hypertension artérielle ne sont pas des contre-indications mais le traitement peut entraîner leur déséquilibre. Il convient de réévaluer leur prise en charge et il peut être nécessaire d'augmenter la dose d'insuline, d'antidiabétique oral ou d'antihypertenseur (voir rubrique 4.5)

En fonction de la durée du traitement et de la posologie utilisée, on peut s'attendre à un impact négatif sur le métabolisme du calcium. Il est donc recommandé de prendre des mesures prophylactiques contre l'ostéoporose, surtout en présence d'autres facteurs de risque (tels que prédisposition familiale, âge avancé, femme ménopausée, apports protéiques et calciques insuffisants, tabagisme excessif, consommation exagérée d'alcool ainsi que le manque d'activité physique). La prophylaxie repose sur un apport suffisant en calcium et en vitamine D ainsi que sur l'activité physique. En cas d'ostéoporose préexistante, un traitement complémentaire doit être envisagé.

Durant la période de traitement, un régime pauvre en sucres d'absorption rapide et hyperprotidique doit être associé, en raison de l'effet hyperglycémiant et du catabolisme protidique avec négativation du bilan azoté.

Les vaccinations à l'aide de vaccins inactivés sont habituellement possibles. Cependant, la réponse immunitaire et par conséquent le succès de la vaccination peuvent être diminués avec de fortes doses de glucocorticoïdes.

L'attention est attirée chez les sportifs, cette spécialité contenant un principe actif pouvant induire une réaction positive des tests pratiqués lors des contrôles antidopage.

#### **4.5. Interactions avec d'autres médicaments et autres formes d'interactions**

##### **Médicaments hypokaliémiants**

L'hypokaliémie est un facteur favorisant l'apparition de troubles du rythme cardiaque (torsades de pointes, notamment) et augmentant la toxicité de certains médicaments, par exemple la digoxine. De ce fait, les médicaments qui peuvent entraîner une hypokaliémie sont impliqués dans un grand nombre d'interactions. Il s'agit des diurétiques hypokaliémiants, seuls ou associés, des laxatifs stimulants, des glucocorticoïdes, du tétracosactide et de l'amphotéricine B (voie IV).

##### **Associations déconseillées** (voir rubrique 4.4)

###### **+ Acide acétylsalicylique**

A des doses anti-inflammatoires d'acide acétylsalicylique (> 1 g par prise et/ou 3g par jour)

Majoration du risque hémorragique

###### **+ Sultopride**

Afssaps 19 avril 2010

Risque majoré de troubles du rythme ventriculaire, notamment de torsades de pointes.

**+ Vaccins vivants atténués**

Risque de maladie vaccinale généralisée, potentiellement mortelle.

**Associations faisant l'objet de précautions d'emploi**

**+ Aminoglutéthimide**

Diminution de l'efficacité de la dexaméthasone par augmentation de son métabolisme hépatique.  
Adaptation de la posologie de la dexaméthasone.

**+ Aprépitant**

Augmentation des concentrations plasmatiques de dexaméthasone par diminution de son métabolisme hépatique par l'aprépitant

Réduire d'environ la moitié la dose de dexaméthasone en cas d'association.

**+ Anticoagulants oraux**

Impact éventuel de la corticothérapie sur le métabolisme de l'anticoagulant oral et sur celui des facteurs de la coagulation.  
Risque hémorragique propre à la corticothérapie (muqueuse digestive, fragilité vasculaire) à fortes doses ou en traitement prolongé supérieur à 10 jours.

Lorsque l'association est justifiée, renforcer la surveillance: contrôle biologique au 8<sup>ème</sup> jour, puis tous les 15 jours pendant la corticothérapie et après son arrêt.

**+ Anticonvulsivants inducteurs enzymatiques: carbamazépine, fosphénytoïne, phénobarbital, phénytoïne, primidone**

Diminution des concentrations plasmatiques et de l'efficacité des corticoïdes par augmentation de leur métabolisme hépatique par l'inducteur: les conséquences sont particulièrement importantes chez les addisoniens traités par l'hydrocortisone et en cas de transplantation.

Surveillance clinique et biologique; adaptation de la posologie des corticoïdes pendant le traitement par l'inducteur et après son arrêt.

**+ Autres médicaments hypokaliémisants (diurétiques hypokaliémisants seuls ou associés, laxatifs stimulants, amphotéricine B IV, tétracosactide)**

Risque majoré d'hypokaliémie. Surveillance de la kaliémie avec, si besoin, correction.

**+ Digitaliques**

Hypokaliémie favorisant les effets toxiques des digitaliques. Corriger auparavant toute hypokaliémie et réaliser une surveillance clinique, électrolytique et électrocardiographique.

**+ Hypoglycémisants**

Augmentation de la glycémie avec parfois acidocétose par diminution de la tolérance aux glucides due aux corticoïdes.  
Prévenir le patient et renforcer l'autosurveillance glycémique et urinaire, surtout en début de traitement. Adapter éventuellement la posologie de l'antidiabétique pendant le traitement par les corticoïdes et après son arrêt.

**+ Isoniazide**

Décrit pour la prednisolone: diminution des concentrations plasmatiques de l'isoniazide. Mécanisme invoqué: augmentation du métabolisme hépatique de l'isoniazide et diminution de celui des glucocorticoïdes. Surveillance clinique et biologique.

**+ Médicaments donnant des torsades de pointes sauf sultopride (cf. associations déconseillées): antiarythmiques de classe Ia (quinidine, hydroquinidine, disopyramide) et antiarythmiques de classe III (amiodarone, sotalol, dofétilide, ibutilide), certains neuroleptiques (thioridazine, chlorpromazine, lévomépromazine, cyaméazine, sulpiride, amisulpride, tiapride, pimozide, halopéridol, dropéridol, véralipride), bépridil, cisapride, diphémanil, érythromycine IV, halofantrine, luméfantrine, méthadone, mizolastine, moxifloxacine, pentamidine, spiramycine IV, vincamine IV).**

Risque majoré de troubles du rythme ventriculaire, notamment des torsades de pointes.

Corriger auparavant toute hypokaliémie avant d'administrer le produit et réaliser une surveillance clinique, électrolytique et électrocardiographique.

**+ Rifampicine**

Diminution des concentrations plasmatiques et de l'efficacité des corticoïdes par augmentation de leur métabolisme hépatique par la rifampicine: les conséquences sont particulièrement importantes chez les addisoniens traités par l'hydrocortisone et en cas de transplantation.

Surveillance clinique et biologique; adaptation de la posologie des corticoïdes pendant le traitement par la rifampicine et après son arrêt.

**+ Topiques gastro-intestinaux, antiacides et charbon (décrit pour la prednisolone, la dexaméthasone)**

Afssaps 19 avril 2010

Diminution de l'absorption digestive des glucocorticoïdes.  
Prendre les topiques gastro-intestinaux à distance des glucocorticoïdes (plus de 2 heures si possible).

#### + Praziquantel

Diminution des concentrations plasmatiques de praziquantel, avec risque d'échec du traitement, par augmentation du métabolisme hépatique du praziquantel par la dexaméthasone.  
Décaler la prise des 2 médicaments d'au moins une semaine.

#### Associations à prendre en compte

##### + Acide acétylsalicylique (à dose antalgique ou antipyrétique) (> = 500 mg par prise ou < 3g par jour)

Abaissement des taux plasmatiques de salicylates par élévation de la clairance. Risque accru d'hémorragies, d'ulcérations et perforations gastro-intestinales.

##### + Antihypertenseurs

Diminution de l'effet antihypertenseur (rétention hydrosodée des corticoïdes).

##### + Atropine et autres anticholinergiques

L'utilisation concomitante de LODOTRA peut exacerber une pression intraoculaire déjà élevée.

##### + Clarithromycine, erythromycine, itraconazole, ketoconazole, nelfinavir, posaconazole, ritonavir, télithromycine, voriconazole :

Augmentation des concentrations plasmatiques de dexaméthasone par diminution de son métabolisme hépatique par l'inhibiteur enzymatique, avec risque d'apparition d'un syndrome cushingoïde.

##### + Fluoroquinolones

Possible majoration du risque de tendinopathie, voire de rupture tendineuse (exceptionnelle), particulièrement chez les patients recevant une corticothérapie prolongée.

#### 4.6. Grossesse et allaitement

##### Grossesse

Chez l'animal, l'expérimentation met en évidence un effet tératogène variable selon les espèces.

Dans l'espèce humaine, il existe un passage transplacentaire. Cependant, les études épidémiologiques n'ont décelé aucun risque malformatif lié à la prise de corticoïdes lors du premier trimestre.

Lors de maladies chroniques nécessitant un traitement tout au long de la grossesse, un léger retard de croissance intra-utérin est possible. Une insuffisance surrénale néonatale a été exceptionnellement observée après corticothérapie à doses élevées.

Il est justifié d'observer une période de surveillance clinique (poids, diurèse) et biologique du nouveau-né.

En conséquence, les corticoïdes peuvent être prescrits pendant la grossesse si besoin.

##### Allaitement

En cas de traitement à doses importantes et de façon chronique, l'allaitement est déconseillé.

#### 4.7. Effets sur l'aptitude à conduire des véhicules et à utiliser des machines

Sans objet.

#### 4.8. Effets indésirables

Ils sont surtout à craindre à doses importantes ou lors d'un traitement prolongé sur plusieurs mois.

- **Infections** : Augmentation du risque d'infections.
- **Troubles du système immunitaire** : Inhibition des processus immunitaires.
- **Désordres hydro-électrolytiques** : Hypokaliémie, alcalose métabolique, rétention hydrosodée, hypertension artérielle, insuffisance cardiaque congestive.
- **Troubles endocriniens et métaboliques** : Syndrome de Cushing iatrogène, inertie de la sécrétion d'ACTH, atrophie corticosurrénalienne parfois définitive, diminution de la tolérance au glucose, révélation d'un diabète latent, arrêt de la croissance chez l'enfant, irrégularités menstruelles. Rétention de sodium avec formation d'œdème. Elimination accrue de potassium, calcium et phosphate.
- **Troubles neuropsychiques** : Fréquemment : euphorie, insomnie, excitation ; rarement : accès d'allure maniaque, états confusionnels ou confuso-oniriques, convulsions (voie générale) ; état dépressif à l'arrêt du traitement.
- **Troubles psychiatriques et du système nerveux** : Perturbations psychiques et neurologiques. Elévation de la

Afssaps 19 avril 2010

pression intracrânienne avec stase papillaire (pseudotumeur cérébrale).

- **Troubles oculaires** : Augmentation de la pression intraoculaire (glaucome); trouble de la transparence du cristallin (cataracte).
- **Troubles cardiovasculaires** : Augmentation des risques de thrombose.
- **Troubles digestifs** : Ulcères gastroduodénaux, ulcération du grêle, perforations et hémorragie digestive, des pancréatites aiguës ont été signalées, surtout chez l'enfant.
- **Troubles cutanés** : Vergetures, acné stéroïdienne, purpura, ecchymose, hypertrichose, retard de cicatrisation.
- **Troubles musculosquelettiques** : Atrophie musculaire précédée par une faiblesse musculaire (augmentation du catabolisme protéidique), ostéoporose, fractures pathologiques en particulier tassements vertébraux, ostéonécrose aseptique des têtes fémorales. Quelques cas de ruptures tendineuses ont été décrits de manière exceptionnelle, en particulier en co-prescription avec les fluoroquinolones.
- **Troubles des organes de reproduction et des seins** : Troubles de la sécrétion hormonale sexuelle (aménorrhée, pilosité anormale, impuissance).

Exception faite de l'ostéoporose, de la nécrose osseuse aseptique, des troubles de croissance chez l'enfant, du glaucome, de la cataracte et des vergetures pourpres, les effets secondaires possibles sont généralement réversibles à l'arrêt du traitement par la dexaméthasone (selon la dose et la durée d'application).

#### 4.9. Surdosage

La toxicité aiguë des glucocorticoïdes est faible et l'on a rarement observé à ce jour des intoxications lors d'un surdosage aigu de glucocorticoïdes. Dans le cas d'un surdosage, il n'existe aucun antidote et le traitement est symptomatique.

### 5. PROPRIETES PHARMACOLOGIQUES

#### 5.1. Propriétés pharmacodynamiques

Classe pharmacothérapeutique: **GLUCOCORTICOIDES**, Code ATC: **H02AB02**.  
(H: **Homones systémiques non sexuelles**).

**Mécanisme d'action**: le mécanisme d'action des glucocorticoïdes est plurivalent. La dexaméthasone se lie à des récepteurs intracellulaires et les active. Le complexe glucocorticoïde-récepteur activé migre dans le noyau cellulaire où il initie ou bloque la synthèse de certaines protéines au niveau de sites de liaison ADN spécifiques.

- Les protéines dont la synthèse est initiée sont, entre autres, la lipocortine-1, qui inhibe la phospholipase A2 essentielle pour la réaction inflammatoire et l'enzyme de conversion de l'angiotensine (ECA) impliquée dans le circuit de régulation de la pression artérielle.
- Font partie des protéines dont la synthèse est inhibée, différentes cytokines (p.ex. TNF-alpha, interleukine-2, interleukine-6), qui activent les cellules du système immunitaire et diverses enzymes pro-inflammatoires (p.ex. collagénase). Egalement inhibée est l'induction de la NO-synthétase et de la cyclo-oxygénase.

En dehors de ces mécanismes génomiques qui interviennent avec un temps de latence compris entre une demi-heure et plusieurs heures, il existe quelques effets rapides observés parfois dès une faible concentration plasmatique (p.ex.: suppression de la sécrétion endogène de cortisol), et d'autres effets activés uniquement à des concentrations plus élevées (p.ex. stabilisation de la membrane). Le mécanisme le plus probable de ce dernier effet est l'incorporation de glucocorticoïdes dans la membrane cellulaire comme manifestation initiale.

**Pharmacodynamie**: La dexaméthasone exerce une action anti-inflammatoire, antiallergique (anti-cédémateuse) et immunosuppressive puissante. Elle accélère le métabolisme glucidique, a des effets antitoxiques aspécifiques (protecteurs de membrane) et favorise la microcirculation (stabilisation de l'irrigation cérébrale).

La dexaméthasone est dotée d'une faible activité minéralocorticoïde.

**Efficacité clinique**: La dexaméthasone est utilisée, à l'instar d'autres glucocorticoïdes, pour un large spectre d'indications. En raison de sa longue demi-vie biologique, la dexaméthasone est particulièrement indiquée chaque fois qu'un effet glucocorticoïde continu est souhaité

#### Remarques particulières :

**Influence sur les méthodes diagnostiques**: Le traitement par NEODEX® 40 mg comprimé sécable peut entraîner les modifications suivantes de certains tests de laboratoire:

- **Taux sériques**
  - Diminué: BSG/temps de coagulation (Lee White)/acide urique/testostérone/potassium/TSH/thyroxine/T3.
  - Augmenté: glucose/cholestérol/sodium/chlorure.
- **Taux urinaires**
  - Diminué: 17-cétostéroïde.

Afssaps 19 avril 2010

- Augmenté: créatinine/calcium/glucose (si prédisposition).

## 5.2. Propriétés pharmacocinétiques

**Absorption:** Après administration orale, la dexaméthasone est absorbée rapidement et totalement dans l'estomac et la partie supérieure de l'intestin grêle. Les pics plasmatiques sont obtenus entre la première et deuxième heure. La biodisponibilité de la dexaméthasone après administration orale est de l'ordre de 80–90%. L'effet pharmacologique maximal n'est cependant atteint qu'au bout de 6 à 24 heures.

**Distribution:** La dexaméthasone se lie aux protéines plasmatiques, essentiellement à l'albumine, allant jusqu'à 80% environ, selon la dose administrée. Dans les posologies très élevées, la majeure partie circule librement dans le sang, c'est-à-dire qu'elle n'est pas liée aux protéines plasmatiques. Le volume de distribution de la dexaméthasone est de 0,6–0,8 L/kg. En cas d'hypoalbuminémie, la proportion de corticoïde non lié (actif) augmente.

La dexaméthasone franchit à la fois la barrière hémato-cérébrale et la barrière placentaire et passe dans le lait maternel.

**Métabolisme:** La dexaméthasone est éliminée principalement sous forme inchangée par les reins. Seule une faible partie subit chez l'homme une hydrogénation ou une hydroxylation, les métabolites principaux étant alors l'hydroxy-6-dexaméthasone et la dihydro-20-dexaméthasone. 30 à 40% de la molécule de dexaméthasone se conjuguent dans le foie humain à l'acide glucuronique ou à l'acide sulfurique et se retrouvent sous cette forme dans l'urine.

**Élimination:** La demi-vie d'élimination plasmatique de la dexaméthasone se situe autour de 3–5 heures, mais sa demi-vie biologique est considérablement plus longue, atteignant les 36–72 heures. Chez l'adulte, la clairance plasmatique s'élève à 2–5 mL/min/kg.

**Cinétique pour certains groupes de patients:**

- Troubles rénaux: pas de modifications essentielles de l'élimination.
- Maladies hépatiques graves (p.ex. hépatite, cirrhose hépatique), hypothyroïdie: prolongation de la demi-vie d'élimination.
- Grossesse: prolongation de la demi-vie d'élimination.
- Nouveau-nés: clairance plasmatique réduite par rapport aux enfants et aux adultes.

## 5.3. Données de sécurité préclinique

**Toxicité aiguë/chronique:** Les glucocorticoïdes ont une très faible toxicité aiguë. Aucune donnée n'est disponible sur la toxicité chronique chez l'humain et l'animal.

**Carcinogénicité:** Des expérimentations animales à long terme sur un potentiel carcinogène ne sont pas disponibles.

**Mutagénicité:** L'effet mutagène de la dexaméthasone n'a pas été suffisamment étudié. Il existe des indices préliminaires sur un potentiel mutagène dont l'importance n'a pas été établie à ce jour.

**Toxicité de reproduction:** Dans l'expérimentation animale sur les souris, les rats, les hamsters, les lapins et les chiens, la dexaméthasone provoque des fentes palatines et dans une moindre mesure d'autres malformations.

## 6. DONNEES PHARMACEUTIQUES

### 6.1. Liste des excipients

Lactose monohydrate, cellulose Microcristalline, silice Colloïdale anhydre, stéarate de magnésium.

### 6.2. Incompatibilités

Sans objet.

### 6.3. Durée de conservation

3 ans.

### 6.4. Précautions particulières de conservation

A conserver à une température ne dépassant pas 25°C

A conserver dans l'emballage d'origine à l'abri de la lumière.

### 6.5. Nature et contenu de l'emballage extérieur

10 comprimés sous plaquettes thermoformées (PVC/PVDC/Aluminium)

### 6.6. Précautions particulières d'élimination et de manipulation

Afssaps 19 avril 2010

**7. TITULAIRE DE L'AUTORISATION TEMPORAIRE D'UTILISATION**

Laboratoires CTRS  
69 rue d'Aguesseau  
92100 Boulogne-Billancourt  
France

**8. NUMERO(S) D'AUTORISATION TEMPORAIRE D'UTILISATION**

589278-2

**9. DATE DE PREMIERE AUTORISATION/DE RENOUELEMENT DE L'AUTORISATION**

{DD/MM/YYYY}

**10. DATE DE MISE A JOUR DU TEXTE**

{DD/MM/YYYY}

---

**CONDITIONS DE PRESCRIPTION ET DE DELIVRANCE**

Liste I.

- Médicament soumis à prescription hospitalière
- Prescription réservée aux spécialistes en hématologie, en oncologie et aux médecins compétents en cancérologie.



# **SmPC methylprednisolone hemisuccinate, Solumedrol®**

# RÉSUMÉ DES CARACTÉRISTIQUES DU PRODUIT

Mis à jour : 16/06/2008

## 1. DENOMINATION DU MEDICAMENT

**SOLUMEDROL 500 mg, poudre pour solution injectable**

## 2. COMPOSITION QUALITATIVE ET QUANTITATIVE

Hémisuccinate de méthylprednisolone ..... 633,65 mg  
Quantité correspondant à méthylprednisolone ..... 500,00 mg

Pour un flacon de poudre.

Pour la liste complète des excipients, [voir rubrique 6.1.](#)

## 3. FORME PHARMACEUTIQUE

Poudre pour solution injectable.

## 4. DONNEES CLINIQUES

### 4.1. Indications thérapeutiques

Les indications sont celles de la corticothérapie générale, lorsque des posologies élevées sont nécessaires en particulier:

- manifestations extra-rénales de certaines maladies systémiques telles que lupus érythémateux disséminé, en cas d'échec de la corticothérapie à dose conventionnelle,
- traitement d'attaque de certaines glomérulopathies associées ou non à une maladie systémique: en cas d'échec d'un traitement usuel,
- certaines vascularites nécrosantes en association éventuelle aux échanges plasmatiques,
- transplantation d'organe et de cellules souches hématopoïétiques allogéniques: traitement du rejet de greffe, traitement de la réaction du greffon contre l'hôte,
- les manifestations aiguës de la polyarthrite rhumatoïde en cas d'échec du traitement usuel, et de la corticothérapie à dose conventionnelle,
- certains purpuras thrombopéniques immunologiques très sévères,
- sclérose en plaques en poussée.

### 4.2. Posologie et mode d'administration

Equivalence anti-inflammatoire (équipotence) pour 5 mg de prednisone: 4 mg de méthylprednisolone.

Cette spécialité n'est pas adaptée à l'administration par voie inhalée par nébulisateur.

Ce médicament est réservé aux cas nécessitant une corticothérapie à haute dose.

La posologie est variable en fonction de l'indication:

- manifestations aiguës de polyarthrite rhumatoïde, manifestations extra-rénales de certaines maladies systémiques, certaines vascularites nécrosantes, traitement d'attaque de certaines glomérulopathies:

500 mg à 1 g par jour,

- greffe d'organe, rejet de greffe: 10 à 15 mg/kg/jour,
- réaction du greffon contre l'hôte: 10 à 20 mg/kg/jour et jusqu'à 500 mg/m<sup>2</sup> toutes les 6 heures pendant 48 heures.

L'administration se fera en intra-veineux:

- soit directe, en injection lente, durée minimum: 20 à 30 minutes ([voir rubrique 4.8](#)).
- soit en perfusion, dans du soluté injectable isotonique de chlorure de sodium ou de glucose.

Cette corticothérapie à hautes doses est généralement limitée à 3 à 5 jours.

#### 4.3. Contre-indications

Ce médicament est généralement contre-indiqué dans les situations suivantes: (il n'existe toutefois aucune contre-indication absolue pour une corticothérapie d'indication vitale):

- tout état infectieux,
- certaines viroses en évolution (notamment hépatites, herpes, varicelle, zona),
- états psychotiques encore non contrôlés par un traitement,
- vaccins vivants,
- hypersensibilité à l'un des constituants.

Ce médicament est généralement déconseillé en association avec les médicaments non antiarythmiques, donnant des torsades de pointes ([voir rubrique 4.5](#)).

#### 4.4. Mises en garde spéciales et précautions d'emploi

##### Mises en garde spéciales

De rares cas de réactions de type pseudo-anaphylactiques étant survenus chez des patients traités par une corticothérapie parentérale, une attention particulière sera portée avant toute administration chez des sujets présentant un terrain atopique.

En cas d'ulcère gastro-duodéal, la corticothérapie n'est pas contre-indiquée si un traitement anti-ulcéreux est associé.

En cas d'antécédents ulcéreux, la corticothérapie peut être prescrite, avec une surveillance clinique et au besoin après fibroscopie.

Un traumatisme crânien par lui-même, quelle qu'en soit la gravité, ne représente pas une indication d'administration d'hémisuccinate de méthylprednisolone. Les résultats d'une étude multicentrique, randomisée, contrôlée versus placebo ont montré une augmentation de la mortalité précoce (à deux semaines) et tardive (à six mois) après un traumatisme crânien chez les patients recevant de l'hémisuccinate de méthylprednisolone, comparé au groupe placebo. Les causes de la surmortalité dans le groupe méthylprednisolone n'ont pas été établies.

La corticothérapie peut favoriser la survenue de diverses complications infectieuses dues notamment à des bactéries, des levures et des parasites. La survenue d'une anguillulose maligne est un risque important. Tous les sujets venant d'une zone d'endémie (régions tropicale, subtropicale, sud de l'Europe) doivent avoir un examen parasitologique des selles et un traitement éradicateur systématique avant la corticothérapie. Les signes évolutifs d'une infection peuvent être masqués par la corticothérapie.

Il importe, avant la mise en route du traitement, d'écartier toute possibilité de foyer viscéral, notamment tuberculeux, et de surveiller, en cours de traitement l'apparition de pathologies infectieuses.

En cas de tuberculose ancienne, un traitement prophylactique anti-tuberculeux est nécessaire, s'il existe des séquelles radiologiques importantes et si l'on ne peut s'assurer qu'un traitement bien conduit de 6 mois par la rifampicine a été donné.

L'emploi des corticoïdes nécessite une surveillance particulièrement adaptée, notamment chez les sujets âgés et en cas de colites ulcéreuses (risque de perforation), diverticulites, anastomoses intestinales récentes, insuffisance rénale, insuffisance hépatique, ostéoporose, myasthénie grave.

Les corticoïdes oraux ou injectables peuvent favoriser l'apparition de tendinopathie, voire de rupture tendineuse (exceptionnelle). Ce risque est augmenté lors de la co-prescription avec des fluoroquinolones et chez les patients dialysés avec hyperparathyroïdisme secondaire ou ayant subi une transplantation rénale.

L'attention des sportifs est attirée sur le fait que cette spécialité contient de la méthylprednisolone; ce principe actif est inscrit sur la liste des substances dopantes.

### **Précautions d'emploi**

Un traitement par voie orale sera institué en relais dès que possible.

Une rétention hydrosodée est habituelle, responsable en partie d'une élévation éventuelle de la pression artérielle. L'apport sodé sera réduit.

La supplémentation potassique n'est justifiée que pour des traitements à fortes doses, prescrits pendant une longue durée ou en cas de risque de troubles du rythme ou d'associations à un traitement hypokaliémiant.

Lorsque la corticothérapie est indispensable, le diabète et l'hypertension artérielle ne sont pas des contre-indications mais le traitement peut entraîner leur déséquilibre. Il convient de réévaluer leur prise en charge.

Les patients doivent éviter le contact avec des sujets atteints de varicelle ou de rougeole.

### **4.5. Interactions avec d'autres médicaments et autres formes d'interactions**

#### **Associations déconseillées**

**+ Médicaments donnant des torsades de pointes: astémizole, bépridil, érythromycine IV, halofantrine, pentamidine, sparfloxacine, sultopride, terféndine, vincamine**

Torsades de pointe (l'hypokaliémie est un facteur favorisant de même que la bradycardie et un espace QT long préexistant).

Utiliser des substances ne présentant pas l'inconvénient d'entraîner des torsades de pointe en cas d'hypokaliémie.

#### **Associations faisant l'objet de précautions d'emploi**

**+ Acide acétylsalicylique par voie générale (et par extrapolation autres salicylés)**

Diminution de la salicylémie pendant le traitement par les corticoïdes et risque de surdosage salicylé après son arrêt (augmentation de l'élimination des salicylés par les corticoïdes).

Adapter les doses de salicylés pendant l'association et après l'arrêt du traitement par les corticoïdes.

**+ Antiarythmiques donnant des torsades de pointes: amiodarone, disopyramide, quinidines, sotalol**

Torsades de pointe (l'hypokaliémie est un facteur favorisant de même que la bradycardie et un espace QT long préexistant).

Prévention de l'hypokaliémie, et, si besoin, correction; surveillance de l'espace QT. En cas de torsades, ne pas administrer d'antiarythmique (entraînement électrosystolique).

**+ Anticoagulants oraux**

Impact éventuel de la corticothérapie sur le métabolisme de l'anticoagulant oral et sur celui des facteurs de la coagulation.

Risque hémorragique propre à la corticothérapie (muqueuse digestive, fragilité vasculaire) à fortes doses ou en traitement prolongé (en cas de relais par voie orale) supérieur à 10 jours.

Lorsque l'association est justifiée, renforcer la surveillance: contrôle biologique au 8ème jour, puis tous les 15 jours pendant la corticothérapie et après son arrêt.

**+ Autres hypokaliémiants: diurétiques hypokaliémiants (seuls ou associés), laxatifs stimulants, amphotéricine B (voie IV)**

Risque accru d'hypokaliémie (effet additif).

Surveillance de la kaliémie, avec, si besoin, correction à prendre particulièrement en compte en cas de

thérapeutique digitalique.

**+ Digitaliques**

Hypokaliémie favorisant les effets toxiques des digitaliques.

Surveillance de la kaliémie, et, s'il y a lieu, ECG.

**+ Héparines (voie parentérale)**

Aggravation par l'héparine du risque hémorragique propre à la corticothérapie (muqueuse digestive, fragilité vasculaire) à fortes doses ou en traitement prolongé supérieur à 10 jours.

L'association doit être justifiée, renforcer la surveillance.

**+ Inducteurs enzymatiques: (anticonvulsivants: carbamazépine, phénobarbital, phénytoïne, primidone), rifampicine.**

Diminution des concentrations plasmatiques et de l'efficacité des corticoïdes par augmentation de leur métabolisme hépatique. Les conséquences sont particulièrement importantes chez les addisoniens et en cas de transplantation.

Surveillance clinique et biologique, adaptation de la posologie des corticoïdes pendant l'association et après arrêt de l'inducteur enzymatique.

**+ Insuline, metformine, sulfamides hypoglycémiants**

Élévation de la glycémie avec parfois cétose (diminution de la tolérance aux glucides par les corticoïdes).

Prévenir le patient et renforcer l'autosurveillance sanguine et urinaire, surtout en début de traitement.

Adapter éventuellement la posologie de l'antidiabétique pendant le traitement par les corticoïdes et après son arrêt.

**+ Isoniazide (décrit pour la prednisolone)**

Diminution des concentrations plasmatiques de l'isoniazide. Mécanisme invoqué: augmentation du métabolisme hépatique de l'isoniazide et diminution de celui des glucocorticoïdes.

Surveillance clinique et biologique.

**Associations à prendre en compte**

**+ Antihypertenseurs**

Diminution de l'effet antihypertenseur (rétention hydrosodée des corticoïdes).

**+ Ciclosporine**

Augmentation possible des concentrations plasmatiques de ciclosporine et de la créatinémie.

Mécanisme invoqué: diminution de l'élimination hépatique de la ciclosporine.

**+ Fluoroquinolones**

Possible majoration du risque de tendinopathie, voire de rupture tendineuse (exceptionnelle), particulièrement chez les patients recevant une corticothérapie prolongée.

**+ Interféron alpha**

Risque d'inhibition de l'action de l'interféron.

**+ Vaccins vivants atténués**

Risque de maladie généralisée éventuellement mortelle. Ce risque est majoré chez les sujets déjà immunodéprimés par la maladie sous-jacente.

Utiliser un vaccin inactivé lorsqu'il existe (poliomyélite).

**4.6. Grossesse et allaitement**

**Grossesse**

Chez l'animal, l'expérimentation met en évidence un effet tératogène variable selon les espèces.

Dans l'espèce humaine, il existe un passage transplacentaire. Cependant, les études épidémiologiques n'ont décelé aucun risque malformatif lié à la prise de corticoïdes lors du premier trimestre.

Lors de maladies chroniques nécessitant un traitement tout au long de la grossesse, un léger retard de croissance intra-utérin est possible. Une insuffisance surrénale néonatale a été exceptionnellement observée après corticothérapie à doses élevées.

Il est justifié d'observer une période de surveillance clinique (poids, diurèse) et biologique du nouveau-né.

En conséquence, les corticoïdes peuvent être prescrits pendant la grossesse si besoin.

**Allaitement**

En cas de traitement à doses importantes et de façon chronique, l'allaitement est déconseillé.

#### 4.7. Effets sur l'aptitude à conduire des véhicules et à utiliser des machines

Sans objet.

#### 4.8. Effets indésirables

Liés à l'administration par voie parentérale:

- De rares cas de réactions anaphylactiques ont pu être rapportés chez des patients traités par des corticostéroïdes par voie parentérale ([voir rubrique 4.4 Mises en garde spéciales](#)).
- Des cas d'arythmie cardiaque et/ou de collapsus cardio-vasculaire et/ou d'arrêt cardiaque en cas d'administration trop rapide par voie intra-veineuse de doses importantes ont été rapportés.
- Il a parfois été constaté une tachycardie après l'injection du produit, celle-ci est rapidement réversible.
- Des épisodes de bradycardie survenant pendant ou à la suite de perfusion de doses importantes ont été décrits indépendamment de la durée ou de la vitesse de perfusion.

Autres effets:

- Désordres hydro-électrolytiques: hypokaliémie, alcalose métabolique, rétention hydrosodée, hypertension artérielle, insuffisance cardiaque congestive.
- Troubles endocriniens et métaboliques: syndrome de Cushing iatrogène, inertie de la sécrétion d'ACTH, atrophie corticosurrénalienne parfois définitive, diminution de la tolérance au glucose, révélation d'un diabète latent, arrêt de la croissance chez l'enfant, irrégularités menstruelles.
- Troubles musculosquelettiques: atrophie musculaire précédée par une faiblesse musculaire (augmentation du catabolisme protéidique), ostéoporose, fractures pathologiques en particulier tassements vertébraux, ostéonécrose aseptique des têtes fémorales.
- Quelques cas de ruptures tendineuses ont été décrits de manière exceptionnelle, en particulier en co-prescription avec les fluoroquinolones.
- Troubles digestifs: hoquets, ulcères gastroduodénaux, ulcération du grêle, perforations et hémorragies digestives, des pancréatites aiguës ont été signalées, surtout chez l'enfant.
- Troubles cutanés: acné, purpura, ecchymose, hypertrichose, retard de cicatrisation.
- Troubles neuropsychiques:
  - fréquemment: euphorie, insomnie, excitation;
  - rarement: accès d'allure maniaque; états confusionnels ou confuso-oniriques, convulsions;
  - état dépressif à l'arrêt du traitement.
- Troubles oculaires: certaines formes de glaucome et de cataracte.

#### 4.9. Surdosage

Sans objet.

## 5. PROPRIETES PHARMACOLOGIQUES

### 5.1. Propriétés pharmacodynamiques

#### CORTICOIDES A USAGE SYSTEMIQUE NON ASSOCIES

Code ATC: H02AB04.

Les glucocorticoïdes physiologiques (cortisone et hydrocortisone) sont des hormones métaboliques essentielles. Les corticoïdes synthétiques, incluant la méthylprednisolone sont utilisés principalement pour leur effet anti-inflammatoire. A forte dose, ils diminuent la réponse immunitaire. Leur effet métabolique et de rétention sodée est moindre que celui de l'hydrocortisone.

### 5.2. Propriétés pharmacocinétiques

- La diffusion est rapide. La demi-vie est de 3h30.
- L'élimination est à la fois urinaire et biliaire.
- Passage dans le lait et à travers le placenta.

### 5.3. Données de sécurité préclinique

Sans objet.

## 6. DONNEES PHARMACEUTIQUES

### 6.1. Liste des excipients

Phosphate monosodique anhydre, phosphate disodique anhydre, hydroxyde de sodium à 10 %.

### 6.2. Incompatibilités

Sans objet.

### 6.3. Durée de conservation

3 ans.

### 6.4. Précautions particulières de conservation

A conserver à une température ne dépassant pas 25 °C.  
Après reconstitution, la solution reconstituée doit être utilisée extemporanément.

### 6.5. Nature et contenu de l'emballage extérieur

500 mg de poudre en flacon (verre).

### 6.6. Précautions particulières d'élimination et de manipulation

## 7. TITULAIRE DE L'AUTORISATION DE MISE SUR LE MARCHÉ

**PFIZER HOLDING FRANCE**  
23-25, avenue du Docteur Lannelongue  
75014 Paris

## 8. NUMERO(S) D'AUTORISATION DE MISE SUR LE MARCHÉ

- 386 777-4 ou 34009 386 777 4 4: 500 mg de poudre en flacon (verre), boîte de 10.

#### **9. DATE DE PREMIERE AUTORISATION/DE RENOUELEMENT DE L'AUTORISATION**

[à compléter par le titulaire]

#### **10. DATE DE MISE A JOUR DU TEXTE**

[à compléter par le titulaire]

#### **11. DOSIMETRIE**

Sans objet.

#### **12. INSTRUCTIONS POUR LA PREPARATION DES RADIOPHARMACEUTIQUES**

Sans objet.

---

## **CONDITIONS DE PRESCRIPTION ET DE DELIVRANCE**

Liste I.

Médicament soumis à prescription hospitalière.

La première administration doit être effectuée en milieu hospitalier.

Médicament pouvant être administré par tout médecin intervenant en situation d'urgence ou dans le cadre d'une structure d'assistance médicale mobile ou de rapatriement sanitaire (article R. 5121-96 du code de la santé publique).



**SmPC Cyclophosphamide, Endoxan ®**

# RÉSUMÉ DES CARACTÉRISTIQUES DU PRODUIT

Mis à jour : 24/11/2005

## 1. DENOMINATION DU MEDICAMENT

**ENDOXAN 1000 mg, poudre pour solution injectable**

## 2. COMPOSITION QUALITATIVE ET QUANTITATIVE

Cyclophosphamide anhydre ..... 1000,00 mg  
Sous forme de cyclophosphamide ..... 1069,00 mg

Pour un flacon.

Pour la liste complète des excipients, [voir rubrique 6.1](#).

## 3. FORME PHARMACEUTIQUE

Poudre pour solution injectable

## 4. DONNEES CLINIQUES

### 4.1. Indications thérapeutiques

- Traitement adjuvant et en situation métastatique des adénocarcinomes mammaires.
- Traitement des cancers ovariens, des cancers bronchiques notamment à petites cellules, des séminomes et carcinomes embryonnaires testiculaires, des cancers de la vessie, des sarcomes, des neuroblastomes, des lymphomes malins hodgkiniens et non hodgkiniens, des myélomes multiples, des leucémies aiguës notamment lymphoïdes.
- A forte dose, conditionnement des allo- et autogreffes médullaires.
- A faible dose, traitement des polyarthrites rhumatoïdes, granulomatose de Wegener, de certaines formes sévères de lupus érythémateux aiguës disséminés, de néphropathies auto-immunes cortico-résistantes.

### 4.2. Posologie et mode d'administration

#### **Posologie**

La posologie du cyclophosphamide est fonction de l'indication thérapeutique (traitement antitumoral ou immunodépresseur, type et localisation de la tumeur, traitement initial ou d'entretien) et de la place du médicament dans le traitement entrepris (utilisé seul ou en association avec d'autres médicaments cytostatiques). Elle est individuelle et doit tenir compte de l'état clinique et hématologique du patient ([voir rubrique 4.4 Précautions d'emploi](#)).

Le cyclophosphamide injectable est habituellement utilisé à des doses moyennes de 150 à 1200 mg/m<sup>2</sup> chez l'enfant et de 500 à 4000 mg/m<sup>2</sup> chez l'adulte, toutes les 3 à 4 semaines, administrées:

- sur 1 à 3 jours à chaque cycle,
- en deux injections à 7 jours d'intervalle.

#### **Mode d'administration**

Afin de préparer une solution isotonique prête à l'emploi, la poudre doit être dissoute dans une solution de chlorure de sodium 0,9% de manière à amener la concentration à 1 g pour 50 ml. En cas de besoin, elle

peut également être dissoute dans une solution de Ringer, dans de l'eau pour préparation injectable ou de solution glucosé. La solution reconstituée ne doit pas être conservée au-delà de 48 heures et ne doit pas dépasser une concentration de 2 %.

La voie d'administration habituelle est la voie veineuse en perfusion courte (30 minutes à 2 heures). La perfusion sur 24 heures est également possible. Le médicament préalablement reconstitué dans une solution de chlorure de sodium 0,9% est introduit dans le liquide de perfusion (solution injectable isotonique de glucose ou de chlorure de sodium).

Il est recommandé d'associer l'administration d'UROMITEXAN à partir de 600 mg/m<sup>2</sup>/j et/ou d'assurer une hydratation suffisante.

Dans certains cas (capital veineux altéré), la voie intra-musculaire peut être utilisée sans dépasser la dose de 500 mg par injection pour des raisons de volume.

En cas d'extravasation, l'administration sera interrompue immédiatement ([voir rubrique 4.9](#)).

#### **Modalités de manipulation**

La préparation des solutions injectables de cytotoxiques doit être obligatoirement réalisée par un personnel spécialisé et entraîné ayant une connaissance des médicaments utilisés, dans des conditions assurant la protection de l'environnement et surtout la protection du personnel qui manipule. Elle nécessite un local de préparation réservé à cet usage. Il est interdit de fumer, de manger, de boire dans ce local. Les manipulateurs doivent disposer d'un ensemble de matériel approprié à la manipulation notamment blouses à manches longues, masque de protection, calot, lunettes de protection, gants à usage unique stériles, champs de protection du plan de travail, conteneurs et sacs de collecte des déchets. Les excréta et les vomissures doivent être manipulés avec précaution. Les femmes enceintes doivent être averties et éviter la manipulation des cytotoxiques. Tout contenant cassé doit être traité avec les mêmes précautions et être considéré comme un déchet contaminé. L'élimination des déchets contaminés se fait par incinération dans des conteneurs rigides étiquetés à cet effet.

Ces dispositions peuvent être envisagées dans le cadre du réseau de cancérologie (circulaire DGS/DH/98 n°98/188 du 24 mars 1998) en collaboration avec toute structure adaptée et remplissant les conditions requises.

### **4.3. Contre-indications**

Ce médicament est contre-indiqué dans les cas suivants:

- en association avec le vaccin contre la fièvre jaune,
- insuffisance médullaire sévère;
- infection urinaire aiguë, cystite hémorragique préexistante;
- allergie connue au cyclophosphamide;
- femmes en âge de procréer n'utilisant pas de contraception efficace ([voir rubrique 4.4](#) et [4.6](#));
- grossesse;
- allaitement.

Ce médicament est généralement déconseillé en association avec:

- les vaccins vivants atténués,
- la phénytoïne.

### **4.4. Mises en garde spéciales et précautions d'emploi**

#### **Mises en garde spéciales**

Les patients des deux sexes en période d'activité génitale doivent avoir une contraception efficace. Femmes en âge de procréer: Il importe de vérifier par un test de grossesse, l'absence de grossesse avant

l'administration de cyclophosphamide ([voir rubrique 4.6](#)).

Les patients désirant procréer doivent être avertis du risque d'aménorrhée ou azoospermie parfois définitive; dans ce dernier cas il peut être envisagé une conservation du sperme.

La prudence est recommandée dans les cas suivants:

- patients en mauvais état général, âgés ou présentant une diminution des défenses immunitaires;
- patients diabétiques;
- notion de radiothérapie antérieure;
- insuffisance hépatique ou rénale préexistante.

Une correction du trouble avant traitement ou une adaptation de dose est alors nécessaire.

Avant de commencer le traitement, il faut corriger ou supprimer toutes obstructions des voies urinaires, les cystites, ainsi que les infections et les troubles électrolytiques.

#### **Précautions particulières d'emploi**

- Une surveillance régulière de l'hémogramme est nécessaire pendant toute la durée du traitement (avant chaque cycle): l'hémogramme doit être contrôlé régulièrement tous les 5 à 7 jours, puis tous les 2 jours si les leucocytes chutent en dessous de 3000/mm<sup>3</sup>. Des contrôles quotidiens peuvent être nécessaires selon les cas.

Chez les patients recevant un traitement au long cours, ce contrôle peut être espacé toutes les 2 semaines.

Un risque de myélosuppression accrue peut s'observer en cas de traitement antérieur par une chimiothérapie ou une radiothérapie ou en cas d'une insuffisance rénale associée. Dans ce cas une numération globulaire et plaquettaire est recommandée.

- L'utilisation du cyclophosphamide peut nécessiter une adaptation de la posologie ou une variation de l'espacement des cycles chez les patients présentant un diabète insipide, une leucopénie, une thrombopénie ou une infiltration cellulaire tumorale de la moelle osseuse.

- En cas de leucopénies sévères, en raison du risque d'infections pouvant engager le pronostic vital, les mesures suivantes sont préconisées: administration d'antibiotiques et/ou d'antifongiques, pouvant être associés à l'utilisation des facteurs de croissance granulocytaires.

- Associée à d'autres médicaments myélosuppresseurs, la prise d'Endoxan peut nécessiter une adaptation de la posologie.

- En cas d'utilisation prolongée ou chez les patients à risque (radiothérapie antérieure du petit bassin, toxicité thérapeutique vésicale antérieure...), il est recommandé d'assurer une hydratation abondante et d'associer la prise d'UROMITEXAN pour prévenir les risques de cystite hémorragique ([voir rubrique 4.2](#)). Il convient également de s'assurer que la diurèse du patient est bonne et de rechercher une éventuelle hématurie microscopique.

Lors de l'emploi de doses élevées ou lors de traitements prolongés, il existe un risque de cystite hémorragique ainsi qu'une possibilité d'altération rénale particulièrement en cas de lésions préexistantes. Des œdèmes de la paroi vésicale, des saignements sub-urétraux, des inflammations interstitielles avec fibroses, ainsi qu'une éventuelle sclérose de la paroi vésicale ont été observés. La présence de globules rouges dans les urines doit être recherchée régulièrement.

En cas d'apparition d'une cystite hémorragique avec hématuries microscopiques ou macroscopiques, il convient d'interrompre Endoxan jusqu'à normalisation des signes cliniques et biologiques.

- L'alopécie peut parfois être prévenue par la mise en place d'un garrot pneumatique à la racine des cheveux lors du traitement ou par celle d'un casque réfrigérant.

#### **4.5. Interactions avec d'autres médicaments et autres formes d'interactions**

En raison de l'augmentation du risque thrombotique lors des affections tumorales, le recours à un

traitement anticoagulant est fréquent. La grande variabilité intra-individuelle de la coagulabilité au cours de ces affections, à laquelle s'ajoute l'éventualité d'une interaction entre les anticoagulants oraux et la chimiothérapie anticancéreuse, imposent, s'il est décidé de traiter le patient par anticoagulants oraux, d'augmenter la fréquence des contrôles de l'INR.

#### **Associations contre-indiquées**

##### **+ Vaccin contre la fièvre jaune:**

Risque de maladie vaccinale généralisée mortelle.

#### **Associations déconseillées**

##### **+ Vaccins vivants atténués (sauf fièvre jaune).**

Risque de maladie vaccinale généralisée éventuellement mortelle. Ce risque est majoré chez les sujets déjà immunodéprimés par la maladie sous-jacente. Utiliser un vaccin inactivé lorsqu'il existe (poliomyélite).

##### **+ Phénytoïne:**

Risque de survenue de convulsions par diminution de l'absorption digestive de la phénytoïne par le cytotoxique ou risque d'augmentation de la toxicité ou de la perte d'efficacité du cytotoxique due à l'augmentation du métabolisme hépatique par la phénytoïne.

#### **Associations à prendre en compte**

##### **+ Ciclosporine (décrit pour doxorubicine, étoposide)**

Immunodépression excessive avec risque de lymphoprolifération.

##### **+ Tacrolimus (par extrapolation à partir de la ciclosporine).**

Immunodépression excessive avec risque de lymphoprolifération

##### Interactions spécifiques au cyclophosphamide.

Un cas isolé d'intoxication aiguë par l'eau a été observé lors de la prise simultanée d'indométacine.

## **4.6. Grossesse et allaitement**

### **Grossesse**

En clinique, quelques cas de malformations (anomalies de membres, craniosténoses, dysmorphies faciales) ont été rapportés après exposition au 1<sup>er</sup> trimestre, même lorsque le cyclophosphamide était utilisé comme immunosuppresseur.

En fin de grossesse, quelques cas d'anémie, voire de pancytopenie ont été rapportés. Il existe également un risque théorique de toxicité cardiaque (troubles du rythme, insuffisance cardiaque). Il est donc conseillé, chaque fois que cela est possible, de programmer la naissance, au moins 3 semaines après la dernière cure, et de réaliser une surveillance néonatale (en particulier hématologique et cardiaque).

### **Allaitement**

En raison du passage du cyclophosphamide dans le lait maternel et de la survenue possible d'effets indésirables graves pour le nouveau-né, l'allaitement est contre-indiqué.

## **4.7. Effets sur l'aptitude à conduire des véhicules et à utiliser des machines**

Certains effets secondaires tels que nausées et vomissements et/ou l'utilisation d'antiémétiques peuvent modifier l'aptitude à conduire des véhicules ou à utiliser des machines.

## **4.8. Effets indésirables**

- La tolérance générale et locale du cyclophosphamide est bonne.
- Une neutropénie et rarement une thrombopénie modérée voire une anémie peuvent être observées: elles sont toujours spontanément réversibles après diminution de la posologie ou à l'arrêt du traitement.

En général, le nadir des leucocytes et plaquettes apparaît pendant les premières et deuxièmes semaines de traitement; ces effets sont généralement réversibles au bout de trois à quatre semaines. Une anémie ne se développe généralement qu'au bout de plusieurs cycles de traitement.

- Certains patients peuvent présenter des nausées associées ou non à des vomissements qui sont facilement prévenus ou supprimés par les antiémétiques.
- L'alopécie est inconstante, transitoire et réversible. Des modifications de la pigmentation des mains, des ongles et de la plante des pieds ont été signalées.
- Dans de rares cas, une augmentation des transaminases, des ictères et des hépatites a été observée.
- Une aménorrhée ou une azoospermie sont possibles, voire définitives.
- Comme pour tout traitement cytotoxique à doses cumulées élevées, le traitement par le cyclophosphamide peut être responsable de tumeurs secondaires. Le risque de développer une tumeur du tractus urinaire, comme un syndrome myélodysplasique pouvant évoluer en leucémie aiguë, est augmenté.
- Autres effets indésirables:
  - des cas de pseudo-sécrétions inappropriées d'hormone antidiurétique (SIADH) ont été décrits avec possibilité d'intoxication aiguë par l'eau;
  - des réactions d'hypersensibilité au cyclophosphamide, éventuellement accompagnées de fièvre sont possibles et peuvent évoluer dans des cas isolés vers un état de choc;
  - des sensations vertigineuses associées à des troubles de la vision transitoires ont été rapportées;
  - des cas isolés de pancréatite aiguë;
  - de très rares cas de syndrome de Stevens Johnson et de toxidermie nécrosante ont été rapportés.

#### Toxicité particulière aux fortes doses:

- à fortes doses (800 à 1600 mg/m<sup>2</sup>):
  - on peut également observer une toxicité gastro-intestinale à type de mucites et/ou de diarrhées.
  - risque de cystite hémorragique ainsi qu'une possibilité d'altération rénale particulièrement en cas de lésions préexistantes. Des œdèmes de la paroi vésicale, des saignements sub-urétraux, des inflammations interstitielles avec fibroses, ainsi qu'une éventuelle sclérose de la paroi vésicale ont été observés.
  - des cas de pneumopathies interstitielles voire de fibroses pulmonaires peuvent se rencontrer. Le risque de fibrose pulmonaire est potentialisé par une radiothérapie antérieure ou associée.
- à très fortes doses (> 1600 mg/m<sup>2</sup>):  
il existe un risque de cardiotoxicité (cardiomyopathie aiguë, ischémie myocardique), potentialisé par l'irradiation antérieure de l'aire cardiaque ou de l'utilisation d'anthracyclines et/ou de pentostatine.

On a pu observer une maladie veino-occlusive du foie (MVO) chez environ 15 à 50% des patients recevant du cyclophosphamide à forte dose en association au busulfan ou à une radiothérapie corporelle totale dans le cadre d'une transplantation allogénique de moelle osseuse. Par contre, la MVO n'est observée que

rarement chez les patients souffrant d'anémie arégénérative et traités en monothérapie par forte dose de cyclophosphamide. Le syndrome se développe typiquement 1 à 3 semaines après la transplantation et se caractérise par une augmentation de poids subite, une hépatomégalie, une ascite et une hyperbilirubinémie, voire une insuffisance hépatique.

Les facteurs prédisposant au développement de la MVO sont des troubles hépatiques fonctionnels préexistants, un médicament hépatotoxique associé à une chimiothérapie à forte dose, en particulier quand le busulfan est utilisé comme alkylant dans le protocole de conditionnement.

#### 4.9. Surdosage

Il n'existe pas d'antidote spécifique du cyclophosphamide.

En cas de surdosage, il sera nécessaire d'adapter les soins en fonction de la toxicité constatée.

Le cyclophosphamide est dialysable.

En cas d'extravasation d'une solution de cyclophosphamide, il n'y a généralement pas de risque d'atteinte tissulaire.

### 5. PROPRIETES PHARMACOLOGIQUES

#### 5.1. Propriétés pharmacodynamiques

##### AGENT ALKYLANT

**MOUTARDE A L'AZOTE**, code ATC: **L01AA01**

(**L: Antinéoplasique et immunomodulateur**).

Agent alkylant bifonctionnel de type oxazaphosphorine appartenant à la famille des moutardes azotées agissant après transformation dans l'organisme.

Le cyclophosphamide agit par interaction directe sur l'ADN en formant des liaisons covalentes avec les substrats nucléophiles par l'intermédiaire de ses radicaux alcoyles. Ceci entraîne des modifications profondes chimiques ou enzymatiques de l'ADN ainsi que la formation de "ponts" alcoyles intrabrinés ou interbrins, avec pour conséquence une inhibition de la transcription et de la réplication de l'ADN aboutissant à la destruction cellulaire. Cette action est cycle dépendante, elle respecte les cellules en G0. Immunodépresseur.

#### 5.2. Propriétés pharmacocinétiques

La molécule initiale est une prodrogue inactive. Elle est hydroxylée dans le foie par les microsomes hépatiques aboutissant essentiellement à la formation du 4-hydroxy-cyclophosphamide et à son tautomère l'aldo-cyclophosphamide puis à la moutarde phosphoramidate (métabolite actif) et à l'acroleïne (métabolite urottoxique).

Une voie métabolique accessoire conduit à une quantité négligeable des métabolites déchloréthylés.

Le temps moyen de demi-vie plasmatique du cyclophosphamide varie de 4 à 7 heures: il est plus court chez l'enfant (4 heures) que chez l'adulte (7 heures en moyenne).

Sous forme inchangée, il n'est pas lié de façon significative aux protéines plasmatiques (12 à 14 %) alors que ses métabolites le sont davantage (52 à 60 %).

La barrière hémato-encéphalique est facilement traversée par le cyclophosphamide et un peu moins par ses métabolites (20 %) ce qui explique son intérêt dans le traitement de certaines tumeurs cérébrales. Son élimination à l'état inchangé ainsi que celle de ses métabolites est essentiellement urinaire.

#### 5.3. Données de sécurité préclinique

### 6. DONNEES PHARMACEUTIQUES

#### 6.1. Liste des excipients

Chlorure de sodium.

#### 6.2. Incompatibilités

Il n'existe pas d'incompatibilités majeures connues.

### 6.3. Durée de conservation

3 ans.

Après reconstitution: 48 heures.

Après dilution dans le milieu de perfusion: 48 heures

### 6.4. Précautions particulières de conservation

A conserver à une température ne dépassant pas + 25°C.

### 6.5. Nature et contenu de l'emballage extérieur

1519 mg de poudre en flacon (verre incolore de type I ou II) fermé par un bouchon (chlorobutyle ou bromobutyle).

### 6.6. Précautions particulières d'élimination et de manipulation

Utiliser de préférence en perfusion intraveineuse après dilution extemporanée dans 50 ml d'une solution de chlorure de sodium à 0,9 %.

La manipulation de ce cytotoxique par le personnel infirmier ou médical nécessite un ensemble de précautions permettant d'assurer la protection du manipulateur et de son environnement ([voir rubrique rubrique 4.2](#)).

Pendant le transport et le stockage d'ENDOXAN, il peut éventuellement se produire une coloration du produit en raison d'une température trop élevée. Il est facile de distinguer visuellement les flacons qui ont subi une telle altération: le cyclophosphamide apparaît sous forme d'agglomérats de poudre jaunâtre ou de liquide visqueux, incolore ou jaunâtre (habituellement sous forme de gouttelettes ou d'une phase continue). Ne pas utiliser les flacons présentant une telle altération.

Tout matériel utilisé pour la dilution et l'administration du produit doit être détruit conformément aux procédures de traitement des déchets cytotoxiques.

En cas de risque particulière, il est nécessaire d'ajouter un filtre dans le système d'injection.

## 7. TITULAIRE DE L'AUTORISATION DE MISE SUR LE MARCHÉ

### **BAXTER SAS**

Avenue Louis Pasteur  
ZA de Coignères Maurepas  
78310 Maurepas

## 8. NUMERO(S) D'AUTORISATION DE MISE SUR LE MARCHÉ

- 558 370-4: 1519 mg de poudre en flacon (verre); boîte de 1.
- 558 371-0: 1519 mg de poudre en flacon (verre); boîte de 5.
- 558 372-7: 1519 mg de poudre en flacon (verre); boîte de 10.
- 558 373-3: 1519 mg de poudre en flacon (verre); boîte de 20.

## 9. DATE DE PREMIERE AUTORISATION/DE RENOUELEMENT DE L'AUTORISATION

[à compléter par le titulaire]

## 10. DATE DE MISE A JOUR DU TEXTE

[à compléter par le titulaire]

## 11. DOSIMETRIE



Sans objet.

## 12. INSTRUCTIONS POUR LA PREPARATION DES RADIOPHARMACEUTIQUES

Sans objet.

---

# CONDITIONS DE PRESCRIPTION ET DE DELIVRANCE

Liste I.

Médicament soumis à prescription hospitalière. Prescription réservée aux spécialistes en oncologie ou en hématologie ou aux médecins compétents en cancérologie. Médicament nécessitant une surveillance particulière pendant le traitement.

# SmPC Thalidomide

## 1. DÉNOMINATION DU MÉDICAMENT

Thalidomide Celgene 50 mg gélule

## 2. COMPOSITION QUALITATIVE ET QUANTITATIVE

Chaque gélule contient 50 mg de thalidomide.

Pour la liste complète des excipients, voir rubrique 6.1.

## 3. FORME PHARMACEUTIQUE

Gélule.

Gélules blanches opaques portant l'inscription « Thalidomide Celgene 50 mg ».

## 4. INFORMATIONS CLINIQUES

### 4.1 Indications thérapeutiques

Thalidomide Celgene est indiqué, en association au melphalan et à la prednisone, pour le traitement de première ligne des patients âgés de plus de 65 ans présentant un myélome multiple non traité ou présentant une contre-indication à la chimiothérapie à haute dose.

Thalidomide Celgene doit être prescrit et délivré conformément au Programme de Prévention de la Grossesse du Thalidomide Celgene (voir rubrique 4.4).

### 4.2 Posologie et mode d'administration

Le traitement par le thalidomide doit être instauré et contrôlé sous la surveillance d'un médecin expérimenté en agents chimiothérapeutiques ou immunomodulateurs et ayant une parfaite connaissance des risques liés à ce traitement et des exigences de surveillance (voir rubrique 4.4).

### Posologie

#### Dose recommandée

La dose recommandée de thalidomide est de 200 mg par jour, par voie orale.

Un nombre maximum de 12 cycles de 6 semaines (42 jours) doit être pratiqué.

Tableau 1 : Doses initiales de thalidomide en association au melphalan et à la prednisone

| Âge (ans) | PNN (µL)             | Numération plaquettaire (µL) | Thalidomide <sup>a,b</sup> | Melphalan <sup>c,d,e</sup> | Prednisone <sup>d</sup> |
|-----------|----------------------|------------------------------|----------------------------|----------------------------|-------------------------|
| ≤ 75      | ≥ 1 500              | ≥ 100 000                    | 200 mg par jour            | 0,25 mg/kg par jour        | 2 mg/kg par jour        |
| ≤ 75      | < 1 500 mais ≥ 1 000 | < 100 000 mais ≥ 50 000      | 200 mg par jour            | 0,125 mg/kg par jour       | 2 mg/kg par jour        |
| > 75      | ≥ 1 500              | ≥ 100 000                    | 100 mg par jour            | 0,20 mg/kg par jour        | 2 mg/kg par jour        |
| > 75      | < 1 500 mais ≥ 1 000 | < 100 000 mais ≥ 50 000      | 100 mg par jour            | 0,10 mg/kg par jour        | 2 mg/kg par jour        |

<sup>a</sup> Thalidomide est administré une fois par jour au coucher les jours 1 à 42 de chaque cycle de 42 jours.

<sup>8</sup> En raison de l'effet sédatif associé au thalidomide, l'administration au coucher améliore généralement la tolérance.

<sup>9</sup> Melphalan est administré une fois par jour les jours 1 à 4 de chaque cycle de 42 jours.

<sup>4</sup> Posologie du melphalan : réduire la dose de 50 % en cas d'insuffisance rénale modérée (clairance de la créatinine : ≥ 30 mais < 50 mL/min) ou sévère (CrCl : < 30 mL/min).

<sup>5</sup> Dose quotidienne maximale de melphalan : 24 mg (âge ≤ 75 ans) ou 20 mg (âge > 75 ans).

<sup>7</sup> Prednisone est administrée une fois par jour les jours 1 à 4 de chaque cycle de 42 jours.

Une surveillance des patients est particulièrement recommandée dans les domaines suivants : risques thrombo-emboliques veineux, neuropathies périphériques, érythème /réactions cutanées, bradycardie, syncope, somnolence, neutropénie et thrombocytopénie (voir rubriques 4.4 et 4.8). Une prise différée, une réduction de dose ou une interruption de traitement peut être nécessaire, selon le grade des critères NCI-CTC (National Cancer Institute Common Toxicity Criteria).

### Risques thrombo-emboliques

Une thromboprophylaxie doit être administrée au moins pendant les 5 premiers mois du traitement, en particulier chez les patients présentant des facteurs de risque de thrombose supplémentaires. La prescription d'anti-thrombotiques en prophylaxie tels que les héparines de bas poids moléculaire ou la warfarine, est recommandée. La décision de mettre en place des mesures prophylactiques anti-thrombotiques devra être prise au cas par cas en fonction des facteurs de risque individuels supplémentaires (voir rubriques 4.4, 4.5 et 4.8).

L'apparition d'une thrombose veineuse impose l'interruption du traitement et la mise en place d'un traitement anticoagulant. Après stabilisation de l'état du patient sous traitement anticoagulant, et après maîtrise des complications liées à l'événement thrombo-embolique, le traitement par le thalidomide peut être repris à la dose initiale, après évaluation du rapport bénéfice/risque. Le patient doit continuer le traitement anticoagulant durant toute la durée du traitement par le thalidomide.

### Neutropénie

La numération formule leucocytaire doit être surveillée régulièrement, conformément aux recommandations en oncologie, en particulier chez les patients qui peuvent être plus sujets à une neutropénie. Une prise différée, une réduction de dose ou une interruption de traitement peut être nécessaire, selon le grade des critères NCI-CTC.

### Thrombocytopénie

La numération plaquettaire doit être surveillée régulièrement, conformément aux recommandations en oncologie. Une prise différée, une réduction de dose ou une interruption de traitement peut être nécessaire, selon le grade des critères NCI-CTC.

### Neuropathie périphérique

Le tableau 2 décrit les ajustements de posologie consécutifs à une neuropathie périphérique.

Tableau 2 : Ajustements de la posologie recommandés en cas de neuropathie périphérique en rapport avec le traitement de première ligne du myélome multiple par Thalidomide Celgene

| Gravité de la neuropathie                                                         | Modification de la posologie                                                                                                                                                                                                                                                                                                                                |
|-----------------------------------------------------------------------------------|-------------------------------------------------------------------------------------------------------------------------------------------------------------------------------------------------------------------------------------------------------------------------------------------------------------------------------------------------------------|
| Grade 1 (paressthésie, faiblesse et/ou perte des réflexes) sans perte de fonction | Poursuivre la surveillance du patient à l'aide d'un examen clinique. En cas d'aggravation des symptômes, il convient d'envisager une réduction de la dose. Cependant, une réduction de la dose n'est pas nécessairement suivie d'une amélioration des symptômes.                                                                                            |
| Grade 2 (fonction altérée mais pas d'impact sur les activités quotidiennes)       | Réduire la dose ou interrompre le traitement et poursuivre la surveillance du patient par examen clinique et neurologique. Interrompre le traitement en cas d'absence d'amélioration ou d'aggravation continue de la neuropathie. En cas de résolution ou de retour au grade 1, le traitement peut être repris si le rapport bénéfice/risque est favorable. |



|                                             |                           |
|---------------------------------------------|---------------------------|
| Grade 3 (activités quotidiennes perturbées) | Interrompre le traitement |
| Grade 4 (neuropathie invalidante)           | Interrompre le traitement |

#### *Sujets âgés*

Aucun ajustement spécifique de la posologie n'est recommandé pour les patients âgés ≤ 75 ans. Pour les patients âgés > 75 ans, la dose initiale recommandée de thalidomide est de 100 mg par jour. La dose initiale de melphalan doit être réduite chez les patients âgés > 75 ans en tenant compte de la réserve médullaire avant le traitement et de la fonction rénale. La dose initiale recommandée de melphalan est de 0,1 à 0,2 mg/kg par jour en fonction de la réserve médullaire avec une réduction supplémentaire de la dose de 50 % en cas d'insuffisance rénale modérée (clairance de la créatinine : ≥ 30 mais < 50 mL/min) ou sévère (ClCr : < 30 mL/min). La dose quotidienne maximale de melphalan est de 20 mg chez les patients âgés > 75 ans (voir tableau 1).

#### *Patients souffrant d'insuffisance rénale ou hépatique*

Thalidomide Celgene n'ayant pas été étudié chez les patients souffrant d'insuffisance rénale ou hépatique, il n'existe aucune recommandation de posologie spécifique pour ces populations de patients. Les patients présentant une insuffisance hépatique ou rénale sévère doivent être étroitement suivis pour détecter toute survenue de réactions indésirables.

#### *Population pédiatrique*

Il n'existe pas d'utilisation justifiée de Thalidomide Celgene dans la population pédiatrique dans l'indication du myélome multiple.

#### *Mode d'administration*

La prise de Thalidomide Celgene se fera de préférence le soir, en prise unique, afin de réduire l'impact de la somnolence. Ce médicament peut être pris pendant ou en dehors des repas.

Il est recommandé d'appuyer sur une extrémité seulement de la gélule pour la sortir de la plaquette, ce qui réduit le risque de déformation ou de rupture de la gélule.

#### 4.3 Contre-indications

- Hypersensibilité au thalidomide ou à l'un des excipients mentionnés à la rubrique 6.1.
- Femmes enceintes (voir rubrique 4.6).
- Femmes en âge de procréer, à moins que toutes les conditions requises par le Programme de Prévention de la Grossesse ne soient remplies (voir rubriques 4.4 et 4.6).
- Patients dans l'incapacité de respecter les mesures de contraception exigées (voir rubrique 4.4).

#### 4.4 Mises en garde spéciales et précautions d'emploi

##### *Effets tératogènes*

Le thalidomide est un tératogène puissant, provoquant des anomalies congénitales graves, potentiellement létales chez l'enfant à naître après exposition pendant la grossesse. Le thalidomide ne doit en aucun cas être utilisé chez la femme enceinte ou susceptible de l'être, sauf si toutes les conditions du Programme de Prévention de la Grossesse sont remplies. Les conditions du Programme de Prévention de la Grossesse doivent être remplies par tous les patients, et concernent à la fois les hommes et les femmes.

Critères permettant de définir qu'une femme est dans l'impossibilité de procréer  
Toute patiente ou partenaire de patient est considérée comme en âge de procréer sauf si elle présente au moins l'un des critères suivants :

- âge ≥ 50 ans et aménorrhéée depuis au moins 1 an ou plus\*.
  - ménopause précoce confirmée par un gynécologue spécialisé.
  - salpingo-ovariectomie bilatérale ou hystérectomie.
  - génotype XY, syndrome de Turner, agénésie utérine.
- \*L'aménorrhéée faisant suite au traitement d'un cancer ne suffit pas à exclure un risque de grossesse.

#### Information des patients

Chez la femme en âge de procréer, l'utilisation du thalidomide est contre-indiquée à moins que toutes les conditions suivantes ne soient remplies :

- La patiente comprend les risques tératogènes pour l'enfant à naître en cas d'exposition au cours de la grossesse
- Elle comprend la nécessité d'une contraception efficace, sans interruption, commencée 4 semaines avant le traitement, poursuivie pendant toute sa durée et jusque 4 semaines après la fin de celui-ci
- Même en cas d'aménorrhéée, toute femme en âge de procréer doit suivre toutes les mesures de contraception efficaces
- Elle doit être en mesure de respecter des mesures de contraception efficaces
- Elle est informée et comprend les conséquences potentielles d'une grossesse et la nécessité de consulter rapidement un médecin s'il existe un risque de grossesse
- Elle comprend la nécessité de devoir débuter le traitement dès que le thalidomide lui a été délivré après un test de grossesse négatif
- Elle comprend la nécessité et accepte de faire un test de grossesse toutes les 4 semaines durant le traitement
- Elle confirme avoir bien compris les risques et les mesures de précaution nécessaires pour l'utilisation du thalidomide.

En raison du passage possible du thalidomide dans le sperme, les hommes traités par le thalidomide doivent :

- Comprendre les risques tératogènes en cas de rapport sexuel avec une femme enceinte ou en âge de procréer.
- Comprendre qu'il est nécessaire d'utiliser des préservatifs en cas de rapport sexuel avec une femme en âge de procréer.

Le médecin prescripteur doit s'assurer que :

- Les patient(e)s remplissent les conditions requises par le Programme de Prévention de la Grossesse
- Les patient(e)s confirment avoir compris les conditions susmentionnées.

#### Contraception

Les femmes en âge de procréer doivent utiliser une méthode de contraception efficace pendant 4 semaines avant le début du traitement, pendant toute la durée de celui-ci et jusqu'à 4 semaines après l'arrêt du thalidomide, même en cas d'interruption du traitement, à moins qu'elles ne déclarent une abstinence totale et continue, qui sera confirmée de façon mensuelle. Si la patiente n'utilise aucun moyen contraceptif efficace, elle devra être orientée de préférence vers un médecin compétent pour être conseillée et afin qu'une contraception adéquate soit instaurée.

Voici des exemples de méthodes de contraception adaptées :

- Implant contraceptif
- Dispositif intra-utérin (DIU) au lévonorgestrel
- Acétate de méthoxyprogestérone retard
- Stérilisation tubaire
- Rapports sexuels exclusivement avec un partenaire vasectomisé ; la vasectomie doit avoir été confirmée par deux spermogrammes négatifs
- Pilules progestatives inhibant l'ovulation (c'est-à-dire désogestrel)

En raison du risque accru d'accidents thrombo-emboliques veineux chez les patients atteints de myélome multiple, l'utilisation de pilules oestroprogestatives n'est pas recommandée (voir rubrique 4.5). Si la patiente est sous pilule oestroprogestative, elle devra utiliser une autre méthode contraceptive, c'est-à-dire une des méthodes citées ci-dessus. Le risque thrombo-embolique persiste pendant 4 à 6 semaines après l'arrêt du contraceptif oral oestroprogestatif.

**Test de grossesse**

Le type de test utilisé doit être d'une sensibilité d'au moins 25 mIU/ml et pratiqué chez les femmes en âge de procréer, sous la responsabilité d'un médecin comme indiqué ci-dessous. Cette exigence inclut les femmes en âge de procréer qui pratiquent l'abstinence absolue en permanence.

**Avant de commencer le traitement**

Un test de grossesse doit être effectué sous contrôle médical lors de la consultation ou dans les 3 jours précédant la consultation lorsque le thalidomide est prescrit si la patiente utilise une contraception efficace depuis au moins 4 semaines. Le test doit confirmer que la patiente n'est pas enceinte au moment où elle débute le traitement par le thalidomide.

**Survivi et arrêt du traitement**

Un nouveau test de grossesse sous contrôle médical doit être effectué toutes les 4 semaines et jusqu'à 4 semaines après l'arrêt du traitement. Ces tests de grossesse doivent être effectués le jour de la consultation dédiée à la prescription ou dans les 3 jours précédents.

**Chez l'homme**

En raison du passage possible du thalidomide dans le sperme, tous les hommes doivent utiliser des préservatifs pendant toute la durée du traitement si leur partenaire est enceinte ou en âge de procréer et n'utilise pas de méthode contraceptive, et pendant 1 semaine à l'issue du traitement et/ou en cas d'interruption des prises.

**Restrictions en matière de prescription et de délivrance**

Chez les femmes en âge de procréer, les prescriptions de Thalidomide Celgene doivent se limiter à 4 semaines de traitement et la poursuite du traitement nécessite une nouvelle prescription. Idéalement, le test de grossesse, la prescription et la délivrance auront lieu le même jour. La délivrance du thalidomide devrait avoir lieu au plus tard 7 jours après la prescription.

Pour tous les autres patients, les prescriptions de Thalidomide Celgene doivent se limiter à 12 semaines et la poursuite du traitement nécessite une nouvelle prescription.

**Précautions supplémentaires**

Les patients doivent être informés de ne jamais donner leur médicament à quelqu'un d'autre et de rapporter les gélules non utilisées à leur pharmacien en fin de traitement.

Les patients ne doivent pas faire de don de sang ou de sperme pendant la prise de thalidomide et pendant 1 semaine après la fin du traitement.

**Documents d'information**

Afin d'aider les professionnels de la santé à éviter toute exposition fœtale au thalidomide et de fournir des informations supplémentaires de sécurité importantes, le titulaire de l'autorisation de mise sur le marché leur fournira des documents d'information. Le Programme de Prévention de la Grossesse Thalidomide Celgene renforce les mises en garde relatives à la tératogénicité du thalidomide, proposant des conseils pour la mise en place d'une contraception préalable au traitement et fournissant des explications sur les tests de grossesse nécessaires. Des informations complètes sur le risque tératogène du thalidomide et sur les mesures contraceptives définies par le Programme de Prévention de la Grossesse doivent être données par le médecin aux femmes en âge de procréer et, le cas échéant, aux hommes.

**Aménorrhée**

Le traitement par le thalidomide peut être associé à des troubles menstruels, incluant une aménorrhée. En cas d'aménorrhée pendant le traitement par le thalidomide, celle-ci doit être considérée comme étant due à une grossesse jusqu'à ce que l'absence de grossesse soit médicalement confirmée. Le mécanisme exact par lequel le thalidomide peut induire une aménorrhée n'est pas élucidé. Les événements rapportés chez des femmes jeunes (non ménopausées) (âge médian : 36 ans) recevant le thalidomide, dans des indications autres que le myélome multiple, sont survenus dans les 6 mois suivant l'instauration du traitement et ont été réversibles après l'arrêt du thalidomide. Dans les cas confirmés pour lesquels des dosages hormonaux étaient disponibles, l'événement d'aménorrhée a été

associé à un taux faible d'œstradiol et à des taux élevés de FSH et de LH. Lorsque les résultats étaient fournis, la recherche d'anticorps anti-ovariens était négative et le taux de prolactine était dans les limites normales.

**Affections cardiovasculaires****Infarctus du myocarde**

Des cas d'infarctus du myocarde (IDM) ont été rapportés chez des patients recevant du thalidomide, notamment chez ceux qui présentent des facteurs de risque connus. Une surveillance étroite s'impose chez les patients présentant des facteurs de risque connus d'IDM, parmi lesquels un antécédent de thrombose. Des mesures doivent être prises pour essayer de réduire au minimum tous les facteurs de risque modifiables (par exemple le tabagisme, l'hypertension et l'hyperlipidémie).

**Événements thrombo-emboliques veineux et artériels**

Le risque de thrombo-embolie veineuse (tels que thrombose veineuse profonde, embolie pulmonaire) et de thrombo-embolie artérielle (tels que infarctus du myocarde, accident vasculaire cérébral) est majoré chez les patients traités par le thalidomide (voir rubrique 4.8). Le risque semble plus important au cours des 5 premiers mois du traitement. Des recommandations relatives à la thromboprophylaxie et au traitement anticoagulant figurent à la rubrique 4.2.

Des antécédents d'événements thrombo-emboliques ou d'administration concomitante d'agents érythropoïétiques ou d'autres agents tels qu'un traitement hormono-substitutif, peuvent aussi accroître le risque thrombo-embolique chez ces patients. De ce fait, il convient d'utiliser ces agents avec prudence chez des patients atteints d'un myélome multiple qui reçoivent le thalidomide en même temps que la prednisone et le melphalan. En particulier, une concentration d'hémoglobine supérieure à 12 g/dl doit conduire à l'arrêt des agents érythropoïétiques. Des mesures doivent être prises pour réduire au minimum tous les facteurs de risque modifiables (par exemple le tabagisme, l'hypertension et l'hyperlipidémie).

Il est conseillé aux patients et aux médecins d'être attentifs à la survenue éventuelle des signes et symptômes d'une thrombo-embolie. Il sera demandé aux patients de consulter leur médecin s'ils développent des symptômes tels qu'essoufflement, douleurs thoraciques, œdème dans les bras ou les jambes.

**Neuropathie périphérique**

La neuropathie périphérique est un effet indésirable très fréquent, potentiellement grave, associé au traitement par le thalidomide, pouvant entraîner des lésions irréversibles (voir rubrique 4.8). Dans une étude de phase 3, le temps médian avant le premier événement de neuropathie était de 42,3 semaines.

Si le patient présente une neuropathie périphérique, il convient de suivre les instructions relatives aux modifications de dose et de schéma thérapeutique fournies à la rubrique 4.2.

Il est recommandé de suivre étroitement les patients afin de détecter tout symptôme de neuropathie. Les symptômes incluent la paresthésie, la dysesthésie, la gêne, la coordination anormale ou la faiblesse.

Des examens neurologiques et cliniques avant le début du traitement par le thalidomide et une surveillance régulière pendant le traitement sont recommandés. Les médicaments associés à un risque de neuropathie doivent être utilisés avec précaution chez les patients recevant du thalidomide (voir rubrique 4.5).

Le thalidomide risque également d'aggraver une neuropathie existante. Il ne doit donc pas être administré à des patients présentant des signes ou des symptômes cliniques de neuropathie périphérique à moins que les bénéfices cliniques ne soient supérieurs aux risques.

#### Syncope, bradycardie et bloc auriculo-ventriculaire

Les patients doivent faire l'objet d'une surveillance en raison du risque de syncope, de bradycardie et de bloc auriculo-ventriculaire, effets pouvant nécessiter une réduction de la dose ou un arrêt du traitement.

#### Hypertension artérielle pulmonaire

Des cas d'hypertension artérielle pulmonaire, parfois d'issue fatale, ont été rapportés chez des patients traités par le thalidomide. Les signes et symptômes de maladie cardiopulmonaire sous-jacente doivent être évalués avant l'instauration du traitement et pendant le traitement par le thalidomide.

#### Affections hématologiques

##### Neutropénie

Chez les patients présentant un myélome multiple, la fréquence de neutropénies de grade 3 ou 4 rapportées en tant qu'effets indésirables a été plus élevée chez ceux recevant l'association MPT (melphalan, prednisone, thalidomide) que chez ceux qui recevaient l'association MP (melphalan, prednisone) : 42,7 % *versus* 29,5 % respectivement (étude IFM 99-06). Dans le cadre de la pharmacovigilance, des effets indésirables tels que neutropénie fébrile et paucycytémie ont été rapportés avec le thalidomide. Les patients doivent être surveillés et une prise différée, une réduction de la dose ou l'interruption du traitement peut être nécessaire (voir rubrique 4.2).

##### Thrombocytopénie

Des thrombocytopénies incluant des cas de grade 3 ou 4 rapportées en tant qu'effets indésirables ont été observées chez des patients présentant un myélome multiple recevant l'association MPT. Les patients doivent être surveillés et une prise différée, une réduction de la dose ou l'interruption du traitement peut être nécessaire (voir rubrique 4.2). Il est conseillé aux patients et à leurs médecins d'être attentifs aux signes et symptômes évocateurs d'une hémorragie, y compris pétéchies, épistaxis et hémorragies digestives, notamment en cas de traitement concomitant susceptible d'induire des saignements (voir rubrique 4.8).

#### Affections hépatiques

Des troubles hépatiques, essentiellement des anomalies des paramètres hépatiques, ont été rapportés. Aucun profil particulier n'a été identifié concernant ces anomalies : hépatite cytolytique, hépatite cholestatique et hépatite mixte cytolytique/cholestatique ont été rapportées. Dans la majorité des cas, ces anomalies sont survenues au cours des deux premiers mois de traitement et se sont corrigées spontanément sans traitement après l'arrêt du thalidomide. La fonction hépatique doit être surveillée, en particulier en cas d'hépatopathie préexistante ou de traitement concomitant par des médicaments susceptibles d'induire une toxicité hépatique (voir rubrique 4.8).

#### Réactions cutanées

En cas de réaction cutanée grave (par exemple, syndrome de Stevens-Johnson), interrompre définitivement le traitement.

#### Somnolence

Le thalidomide est associé à un risque important de somnolence. Les patients doivent être informés de ce risque de somnolence et demander un avis médical avant de prendre d'autres médicaments connus pour provoquer une somnolence. Les patients doivent faire l'objet d'un suivi et une réduction de dose peut s'avérer nécessaire.

Les patients doivent être informés quant à la possibilité d'affaiblissement des capacités mentales et/ou physiques nécessaires à l'exécution des tâches dangereuses (voir rubrique 4.7).

#### Syndrome de lyse tumorale

Les patients présentant des risques de syndrome de lyse tumorale sont ceux qui ont une charge tumorale élevée avant le traitement. Ces patients doivent être étroitement surveillés et les précautions appropriées doivent être prises.

#### Infections

Les patients doivent faire l'objet d'une surveillance en raison du risque d'infections graves incluant septicémie et choc septique.

Des cas de réactivation virale ont été rapportés chez des patients traités par le thalidomide, y compris des cas graves de réactivation du virus de la varicelle et du zona et du virus de l'hépatite B (VHB).

Dans certains des cas, la réactivation du virus de la varicelle et du zona a entraîné un zona disséminé, nécessitant une suspension temporaire du traitement par le thalidomide et un traitement antiviral adéquat.

Certains cas de réactivation du virus de l'hépatite B ont évolué vers une insuffisance hépatique aiguë et conduit à l'arrêt du traitement par le thalidomide. La sérologie VHB doit être déterminée avant l'instauration du traitement par le thalidomide. Chez les patients présentant un résultat positif au test de dépistage de l'infection par le VHB, une consultation avec un médecin spécialisé dans le traitement de l'hépatite B est recommandée.

Les patients préalablement infectés doivent être étroitement surveillés pendant toute la durée du traitement afin de détecter des signes et symptômes de réactivation virale, notamment d'infection active par le VHB.

#### Leucémie aigüe myéloblastique (LAM) et syndromes myélodysplasiques (SMD)

Une augmentation statistiquement significative des cas de LAM et de SMD a été observée dans une étude clinique en cours chez des patients présentant un myélome multiple non préséalement traité recevant l'association de melphalan, prednisone et thalidomide (MPT). Le risque augmente au cours du temps et il était d'environ 2 % après deux ans et d'environ 4 % après trois ans. Une fréquence plus élevée de cancers secondaires (CS) a également été observée chez les patients présentant un myélome multiple de novo traités par le lenalidomide. Parmi les CS invasifs, des cas de LAM/SMD ont été observés chez des patients recevant le lenalidomide en association avec le melphalan ou immédiatement après melphalan à forte dose et autogreffé de cellules souches.

Le bénéfice obtenu avec le thalidomide et le risque de LAM et de SMD doivent être pris en compte avant d'instaurer un traitement par le thalidomide en association avec le melphalan et la prednisone. Les médecins doivent évaluer soigneusement les patients avant et pendant le traitement en utilisant les méthodes habituelles de dépistage des cancers et instaurer un traitement s'il est indiqué.

#### Patients atteints d'insuffisance rénale ou hépatique

Les études menées chez des volontaires sains et des patients atteints d'un myélome multiple semblent indiquer que la fonction rénale ou hépatique n'influe pas de façon significative sur le thalidomide (voir rubrique 5.2). Cependant, cela n'a pas été étudié formellement chez les patients atteints d'insuffisance rénale ou hépatique. Par conséquent, les patients présentant une insuffisance rénale ou hépatique sévère doivent être suivis étroitement afin de détecter toute survenue d'effets indésirables.

#### Réactions allergiques

Des cas de réactions allergiques/angio-œdème ont été rapportés. En cas d'éruption cutanée, le traitement par le thalidomide doit être interrompu. Il ne pourra être repris qu'après une évaluation clinique appropriée. En cas d'angio-œdème, une nouvelle utilisation du thalidomide est à proscrire.

#### **4.5 Interactions avec d'autres médicaments et autres formes d'interactions**

Le thalidomide ne représente pas un bon substrat pour les isoenzymes du cytochrome P450. Par conséquent, il est peu probable que des interactions avec des médicaments qui sont des inhibiteurs et/ou des inducteurs de cette enzyme se produisent. Le métabolisme par hydrolyse non enzymatique du thalidomide, qui est le principal mécanisme de clairance, suggère que le potentiel d'interactions du thalidomide avec d'autres médicaments est faible.

Augmentation des effets sédatifs d'autres médicaments

#### Grossesse

Le thalidomide est contre-indiqué pendant la grossesse et chez les femmes en âge de procréer à moins que toutes les conditions du Programme de Prévention de la Grossesse ne soient remplies (voir rubrique 4.3).

Le thalidomide est un tératogène puissant, induisant une fréquence élevée (environ 30 %) d'anomalies congénitales graves, potentiellement fœtales telles que : ectromélie (amélie, phocomélie, hémimélie) des membres supérieurs et/ou inférieurs, microtie avec anomalie de l'orifice externe du conduit auditif (totale ou partielle), lésions de l'oreille moyenne et interne (moins fréquentes), lésions oculaires (anophtalmie, microphthalmie), cardiopathie congénitale, anomalies rénales. D'autres anomalies moins fréquentes ont été également décrites.

#### Allaitement

On ne sait pas si le thalidomide est excrété dans le lait maternel. Les études chez l'animal ont mis en évidence l'excrétion de thalidomide dans le lait maternel. Par conséquent, l'allaitement doit être interrompu pendant le traitement par le thalidomide.

#### Fertilité

Une étude sur les lapins n'a démontré aucun effet sur les indices de fertilité chez les mâles ou les femelles, bien qu'une dégénérescence des testicules ait été observée chez les mâles.

#### **4.7 Effets sur l'aptitude à conduire des véhicules et à utiliser des machines**

Thalidomide Celgene a une influence modérée sur l'aptitude à conduire des véhicules et à utiliser des machines. Le thalidomide peut entraîner de la fatigue, des étourdissements, une somnolence et des troubles de la vision (voir rubrique 4.8). Il faut donc déconseiller aux patients la conduite de véhicules, l'utilisation de machines ou la réalisation de tâches dangereuses durant le traitement par le thalidomide.

#### **4.8 Effets indésirables**

##### Résumé du profil de sécurité

La majorité des patients prenant du thalidomide sont susceptibles de présenter des effets indésirables. Les effets indésirables les plus fréquemment observés chez les patients ayant reçu du thalidomide en association au melphalan et à la prednisone sont : neutropénie, leucopénie, constipation, somnolence, paresthésie, neuropathie périphérique, anémie, lymphopénie, thrombocytopénie, vertiges, dysesthésie, tremblements et œdème périphérique.

Outre les effets indésirables listés ci-dessus, on a observé dans d'autres études cliniques que l'association de thalidomide et de dexaméthasone peut être à l'origine d'effets indésirables très fréquents : fatigue ; fréquents : accident ischémique transitoire, syncope, vertiges, hypotension, troubles de l'humeur, anxiété, vision floue, nausées et dyspepsie ; peu fréquents : accident vasculaire cérébral, perforation diverticulaire, péritonite, hypotension orthostatique et bronchite.

Les effets indésirables les plus graves observés chez les patients ayant reçu du thalidomide en association au melphalan et à la prednisone ou à la dexaméthasone sont : thrombose veineuse profonde et embolie pulmonaire, neuropathie périphérique, réactions cutanées graves comprenant syndrome de Stevens-Johnson et nécrolyse épidermique toxique, syncope, bradycardie et vertiges (voir rubriques 4.2, 4.4 et 4.5).

##### Liste tabulée des effets indésirables

Le tableau 3 indique uniquement les effets indésirables pour lesquels une relation avec le médicament peut être raisonnablement établie. Les fréquences indiquées sont basées sur des observations réalisées au cours d'une étude clinique comparative pivot portant sur l'effet du thalidomide en association au melphalan et à la prednisone chez des patients souffrant de myélome multiple traité pour la première fois. En plus des effets indésirables observés dans l'étude pivot, les effets indésirables basés sur la pharmacovigilance du médicament, sont présentés après le tableau 3.

Le thalidomide possède des propriétés sédatives susceptibles d'augmenter la sédation due aux anxiolytiques, aux hypnotiques, aux antipsychotiques, aux antihistaminiques H1, aux dérivés d'opiacés, aux barbituriques et à l'alcool. Il convient d'utiliser le thalidomide avec précaution lors de l'association à des médicaments susceptibles d'entraîner une somnolence.

##### Effet bradycardique

Les médicaments, tels que les substances actives connues pour induire des torsades de pointe, les bêta-bloquants ou les anticholinestériques ayant le même effet pharmacodynamique que le thalidomide (connu pour être à l'origine de bradycardie) doivent être utilisés avec précaution.

##### Médicaments connus pour leur risque de neuropathie périphérique

Les médicaments possédant un risque de neuropathie périphérique (par exemple la vincristine et le bortézomib) doivent être utilisés avec précaution chez les patients recevant du thalidomide.

##### Contraceptifs hormonaux

Le thalidomide ne présente pas d'interaction avec les contraceptifs hormonaux, comme l'a montré l'étude du profil pharmacocinétique de l'association de 0,1 mg d'acétate de norethindrone et de 0,75 mg d'éthinylestradiol, administrés en dose unique chez 10 sujets sains de sexe féminin. Les résultats ont en effet été similaires (temps à la concentration maximale) avec et sans la co-administration de 200 mg/jour de thalidomide. Cependant, l'administration concomitante de contraceptifs hormonaux n'est pas recommandée en raison du risque accru de maladie thrombotique veineuse.

##### Warfarine

L'administration de plusieurs doses de 200 mg de thalidomide par jour pendant 4 jours n'a eu aucun effet sur le Temps de Quick exprimé en INR (International Normalized Ratio) chez des volontaires sains. Cependant, en raison du risque accru de thrombose chez les patients atteints d'un cancer et d'accélération du métabolisme de la warfarine avec les corticostéroïdes, une surveillance étroite du Temps de Quick, exprimé en INR, est recommandée pendant l'administration concomitante de thalidomide-prednisone et pendant les premières semaines suivant l'arrêt de ces traitements.

##### Digoxine

Le thalidomide ne présente pas d'interaction avec la digoxine. L'administration de plusieurs doses de 200 mg de thalidomide à 18 volontaires sains de sexe masculin n'a eu aucun effet apparent sur la pharmacocinétique de la digoxine administrée en dose unique. En outre, l'administration d'une dose unique de digoxine de 0,5 mg n'a eu aucun effet apparent sur la pharmacocinétique du thalidomide. On ne sait pas si l'effet sera différent chez les patients atteints de myélome multiple.

#### **4.6 Fertilité, grossesse et allaitement**

##### Femmes en âge de procréer/Contraception chez les hommes et les femmes

Les femmes en âge de procréer doivent recourir à une méthode de contraception efficace 4 semaines avant le traitement, pendant toute la durée du traitement et 4 semaines après la fin du traitement par le thalidomide (voir rubrique 4.4). En cas de survenue d'une grossesse chez une femme traitée par le thalidomide, le traitement doit être immédiatement arrêté et la patiente doit être adressée à un médecin spécialiste ou expérimenté en tératologie pour évaluation et conseil.

En raison du passage de thalidomide dans le sperme, les hommes doivent utiliser des préservatifs pendant toute la durée du traitement et pendant 1 semaine après l'interruption et/ou l'arrêt du traitement quand ils ont des rapports sexuels avec une femme enceinte ou une femme susceptible d'être et qui n'utilise pas de méthode de contraception. Si une grossesse survient chez la partenaire d'un patient prenant du thalidomide, la partenaire doit être orientée vers un médecin qui est spécialisé ou a de l'expérience en tératologie pour évaluation et conseil.

Les fréquences sont définies comme suit : très fréquent ( $\geq 1/10$ ) ; fréquent ( $\geq 1/100$ ,  $< 1/10$ ) ; peu fréquent ( $\geq 1/1\ 000$ ,  $< 1/100$ ) ; rare ( $\geq 1/10\ 000$ ,  $< 1/1\ 000$ ) ; très rare ( $< 1/10\ 000$ ) et fréquence indéterminée (ne peut être estimée sur la base des données disponibles). Au sein de chaque fréquence de groupe, les effets indésirables sont présentés suivant un ordre décroissant de gravité.

**Tableau 3 : Fréquence des effets indésirables (EI) du thalidomide administré en association au melphalan et à la prednisone**

| Classe de systèmes d'organes                            | Tous les EI                                                                                                                                             |
|---------------------------------------------------------|---------------------------------------------------------------------------------------------------------------------------------------------------------|
| Infections et infestations                              | Fréquent<br>Pneumonie                                                                                                                                   |
| Affections hématologiques et du système lymphatique     | Très fréquent<br>Neutropénie<br>Leucopénie<br>Anémie<br>Lymphopénie<br>Thrombocytopénie                                                                 |
| Affections psychiatriques                               | Fréquent<br>État confusionnel<br>Dépression                                                                                                             |
| Affections du système nerveux                           | Très fréquent<br>Neuropathie périphérique*<br>Tremblements<br>Vertiges<br>Paresthésie<br>Dysesthésie<br>Somnolence<br>Fréquent<br>Coordination anormale |
| Affections cardiaques                                   | Fréquent<br>Insuffisance cardiaque<br>Bradycardie                                                                                                       |
| Affections vasculaires                                  | Fréquent<br>Thrombose veineuse profonde*                                                                                                                |
| Affections respiratoires, thoraciques et médiastinales  | Fréquent<br>Embolie pulmonaire*<br>Pneumopathie interstitielle<br>Bronchopneumopathie<br>Dyspnée                                                        |
| Affections gastro-intestinales                          | Très fréquent<br>Constipation<br>Fréquent<br>Vomissements<br>Bouche sèche                                                                               |
| Affections de la peau et du tissu sous-cutané           | Fréquent<br>Toxidermie<br>Erythème<br>Sécheresse cutanée                                                                                                |
| Troubles généraux et anomalies au site d'administration | Très fréquent<br>Gême périphérique<br>Fréquent<br>Pyrexie<br>Asthénie<br>Malaise                                                                        |

\* Voir rubrique 4.8 Description de certains effets indésirables

Les autres effets indésirables observés lors du suivi de pharmacovigilance du thalidomide et qui n'ont pas été observés dans l'étude pivot comprennent : nécrolyse épidermique toxique (voir rubrique 4.4), obstruction intestinale, hypothyroïdie, dysfonctionnement érectile, syndrome de lyse tumorale (voir rubrique 4.4), perforations gastro-intestinales, réactions allergiques (hypersensibilité, angio-œdème/urticaire) (voir rubrique 4.4), diminution de l'audition ou surdité, insuffisance rénale, infarctus du myocarde (voir rubrique 4.4), aggravation des symptômes parkinsoniens, infections graves (telles que septicémie fatale avec choc septique) (voir rubrique 4.4), convulsions, fibrillation auriculaire, bloc auriculo-ventriculaire (voir rubrique 4.4), troubles menstruels dont aménorrhée (voir rubrique 4.4), pancréatite, hémorragie digestive (voir rubrique 4.4), affections hépatiques (voir rubrique 4.4) et syndrome d'encéphalopathie postérieure réversible (SEPR), hypertension artérielle pulmonaire (voir rubrique 4.4) et infections virales, y compris réactivation du virus de la varicelle et du zona et du virus de l'hépatite B (voir rubrique 4.4).

#### Description de certains effets indésirables

##### *Affections hématologiques et du système lymphatique*

Les effets indésirables hématologiques sont présentés comparativement à ceux observés avec le comparateur, en raison des effets indésirables significatifs de celui-ci dans ces affections (Tableau 4).

**Tableau 4 : Comparaison des affections hématologiques pour les associations melphalan-prednisone (MP) et melphalan-prednisone-thalidomide (MPT) dans l'étude IFM 99-06 (voir rubrique 5.1)**

|                       | n (% de patients) |               |
|-----------------------|-------------------|---------------|
|                       | MP (n = 193)      | MPT (n = 124) |
| <b>Grades 3 et 4*</b> |                   |               |
| Neutropénie           | 57 (29,5)         | 53 (42,7)     |
| Leucopénie            | 32 (16,6)         | 32 (25,8)     |
| Anémie                | 28 (14,5)         | 17 (13,7)     |
| Lymphopénie           | 14 (7,3)          | 15 (12,1)     |
| Thrombocytopénie      | 19 (9,8)          | 14 (11,3)     |

\* Centres de l'OMS

Une neutropénie fébrile et une pancytopénie, non observées dans l'étude pivot, ont été rapportées comme effets indésirables supplémentaires lors du suivi post-commercialisation du thalidomide.

##### *Téatrogénicité*

Le risque de morts *in utero* ou d'anomalies congénitales graves, principalement la phocomélie, est extrêmement élevé. Le thalidomide ne doit en aucun cas être administré pendant la grossesse (voir rubriques 4.4 et 4.6).

##### *Événements thrombo-emboliques veineux et artériels*

Un risque accru de thrombo-embolie veineuse (tels que thrombose veineuse profonde, embolie pulmonaire) et de thrombo-embolie artérielle (tels qu'infarctus du myocarde, accident vasculaire cérébral) a été décrit chez les patients recevant du thalidomide (voir rubrique 4.4).

##### *Neuropathie périphérique*

La neuropathie périphérique est un effet indésirable très fréquent, potentiellement grave, associé au traitement par le thalidomide, pouvant entraîner des lésions irréversibles (voir rubrique 4.4). La neuropathie périphérique se produit généralement à la suite d'une administration prolongée. Toutefois, certains cas ont été observés après une utilisation de courte durée. La fréquence des événements neuropathiques menant à l'arrêt, à la réduction ou à l'interruption de la dose augmente avec une dose cumulée et avec la durée du traitement. Les symptômes peuvent apparaître un certain temps après l'arrêt du traitement par le thalidomide. Ils peuvent disparaître lentement ou pas du tout.



Syndrôme d'encéphalopathie postérieure réversible (SEPR)/syndrôme de leucoencéphalopathie postérieure réversible (SLPR)

Des cas de SEPR/SLPR ont été rapportés. Les signes et symptômes étaient des troubles visuels, des céphalées, des convulsions et une altération de l'état mental, avec ou sans hypertension associée. Le diagnostic de SEPR/SLPR doit être confirmé par imagerie cérébrale. Dans la majorité des cas rapportés, les patients présentaient des facteurs de risque reconnus de SEPR/SLPR, notamment hypertension, insuffisance rénale et corticothérapie à dose élevée et/ou chimiothérapie concomitantes.

Leucémie aiguë myéloblastique (LAM) et syndromes myélochylastiques (SMD)

Des cas de LAM et de SMD ont été rapportés dans une étude clinique en cours chez des patients présentant un myélome multiple non préalablement traité recevant l'association de melphalan, prednisone et thalidomide (voir rubrique 4.4).

Sujets âgés

Le profil des effets indésirables rapportés chez les patients âgés > 75 ans traités par le thalidomide 100 mg une fois par jour a été comparable à celui observé chez les patients âgés ≤ 75 ans traités par le thalidomide 200 mg une fois par jour (voir tableau 3). Toutefois la fréquence de survenue des effets indésirables graves est plus élevée chez les patients âgés > 75 ans.

Déclaration des effets indésirables suspects

La déclaration des effets indésirables suspects après autorisation du médicament est importante. Elle permet une surveillance continue du rapport bénéfice/risque du médicament. Les professionnels de santé déclarent tout effet indésirable suspecté via le [système national de déclaration](#) – [voir Annexe V](#).

#### 4.9 Surdosage

Dix-huit cas de surdosage ont été signalés dans la littérature concernant des doses allant jusqu'à 14,4 g. Aucun décès n'a été signalé et aucun cas de surdosage n'a été à l'origine de séquelles. Il n'existe aucun antidote spécifique en cas de surdosage au thalidomide. En cas de surdosage, les signes vitaux du patient doivent être surveillés et un traitement symptomatique approprié doit être prodigué pour maintenir une pression artérielle et un état respiratoire normaux.

## 5. PROPRIÉTÉS PHARMACOLOGIQUES

### 5.1 Propriétés pharmacodynamiques

Classe pharmacothérapeutique : Immunosuppresseurs, autres immunosuppresseurs. Code ATC : L04AX02.

Le thalidomide est une molécule chirale. C'est le racémate (+)-(R)- et (-)-(S)-thalidomide qui est utilisé. Le spectre d'activité du thalidomide n'est pas entièrement caractérisé.

Mécanisme d'action

Le thalidomide présente des propriétés anti-inflammatoires, immunomodulatrices et potentiellement antitumorales. Les essais *in vitro* et les études cliniques suggèrent que les effets immunomodulateurs, anti-inflammatoires et antitumoraux du thalidomide sont liés à l'inhibition de la production de TNF- $\alpha$  (Tumor Necrosis Factor-alpha), à une intervention sur les molécules de surface impliquées dans la migration des leucocytes et à une activité antiangiogénique. Le thalidomide possède également des propriétés hypnotiques et sédatives d'origine centrale, différentes de celles des barbituriques. Il n'a aucun effet antibactérien.

Efficacité et sécurité cliniques

Les résultats de l'étude multicentrique, en groupes parallèles, ouverte et randomisée de phase 3 IFM 99-06 ont fait apparaître un gain de survie quand le thalidomide est utilisé en association au melphalan et à la prednisone pendant 12 cycles de 6 semaines pour le traitement du myélome multiple de novo. Dans cette étude, les patients étaient âgés de 65 à 75 ans, avec 41 % (183/447) des patients

âgés de 70 ans ou plus. La dose médiane de thalidomide était de 217 mg et 40 % des patients ont reçu 9 cycles. Le melphalan et la prednisone ont été administrés à une dose de respectivement 0,25 mg/kg/jour et 2 mg/kg/jour les jours 1 à 4 de chaque cycle de 6 semaines.

Suite à l'analyse per protocole, une actualisation a été réalisée pour l'étude IFM 99-06, fournissant des données de suivi supplémentaires de 15 mois. La survie globale médiane était de  $51,6 \pm 4,5$  et  $33,2 \pm 3,2$  mois dans les groupes MPT et MP, respectivement (IC à 97,5 % 0,42 à 0,84). Cette différence de 18 mois était statistiquement significative, avec un *hazard ratio* de réduction du risque de décès dans le groupe MPT de 0,59, intervalle de confiance à 97,5 % de 0,42-0,84 et valeur *p* de < 0,001 (voir Figure 1).

Figure 1 : Taux de survie globale selon le traitement

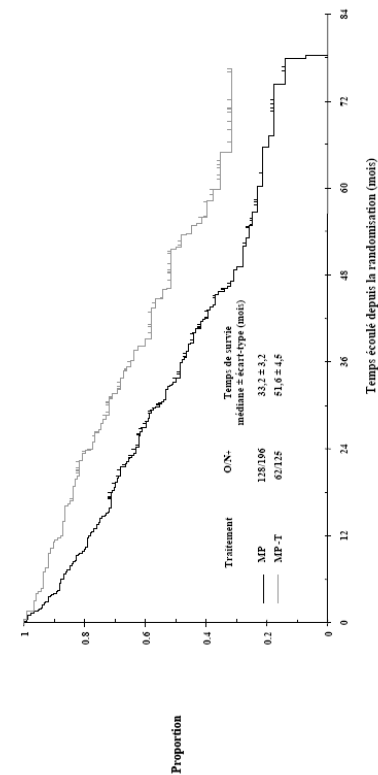

Population pédiatrique

L'Agence européenne des médicaments a accordé une dérogation à l'obligation de soumettre les résultats d'études réalisées avec le thalidomide dans tous les sous-groupes de la population pédiatrique dans l'indication du myélome multiple (voir rubrique 4.2 pour les informations concernant l'usage pédiatrique).

### 5.2 Propriétés pharmacocinétiques

Absorption

L'absorption du thalidomide est lente après administration par voie orale. Les concentrations plasmatiques maximales sont atteintes entre 1 et 5 heures après l'administration. L'ingestion concomitante d'aliments retarde l'absorption mais n'a pas d'incidence sur le niveau d'absorption.

Distribution

Le taux de liaison avec les protéines plasmatiques des énantiomères (+)-(R) et (-)-(S) est respectivement de 55 % et 65 %. Le thalidomide est présent dans le sperme à des niveaux similaires aux concentrations plasmatiques. Par conséquent, en raison des risques tératogènes importants connus du produit, pendant le traitement par le thalidomide et pendant 1 semaine après l'arrêt du traitement, les patients hommes doivent utiliser des préservatifs si leur partenaire est enceinte ou est susceptible de le devenir et si elle n'utilise pas de méthode de contraception efficace (voir rubrique 4.4). L'âge, le sexe, la fonction rénale et les paramètres biologiques cliniques n'ont pas d'effet significatif sur la distribution du thalidomide.

#### Biotransformation

Le thalidomide est métabolisé presque exclusivement par hydrolyse non enzymatique. Dans le plasma, le thalidomide sous forme inchangée représente 80 % des composants en circulation. Le thalidomide sous forme inchangée est un composant mineur (moins de 3 % de la dose) dans les urines. En plus du thalidomide, les produits hydrolytiques N-(o-carboxybenzoyl) glutarimide et phthaloyl-isoglutamine, issus de processus non enzymatiques, sont également retrouvés dans le plasma et en majorité dans les urines. Le métabolisme oxydatif ne contribue pas de façon significative au métabolisme global du thalidomide. Le thalidomide subit une métabolisation hépatique limitée, catalysée par le cytochrome P450. Des données *in vitro* indiquent que le prednisone peut donner lieu à une induction enzymatique susceptible de réduire l'exposition systémique des médicaments pris en concomitance. La pertinence *in vivo* de ces observations n'est pas connue.

#### Élimination

La demi-vie d'élimination moyenne du thalidomide dans le plasma après des doses uniques comprises entre 50 et 400 mg administrées par voie orale était de 5,5 à 7,3 heures. Après administration d'une dose orale unique de 400 mg de thalidomide radiomarqué, la récupération moyenne totale, au jour 8, a été de 93,6 % de la dose administrée. La majorité de la dose radioactive a été excrétée dans les 48 heures suivant l'administration. La voie rénale a été la voie principale d'élimination (plus de 90 %), tandis que l'excrétion fécale a été mineure.

Il existe une relation linéaire entre le poids et la clairance estimée du thalidomide. Chez des patients atteints d'un myélome multiple pesant de 47 à 133 kg, la clairance du thalidomide a été d'environ 6 à 12 l/h, ce qui représente une augmentation de la clairance de 0,621 l/h pour chaque augmentation du poids de 10 kg.

#### Linéarité/non-linéarité

L'exposition systémique totale (ASC) est proportionnelle à la dose pour des doses uniques. La pharmacocinétique ne dépend pas du facteur temps.

#### Insuffisance rénale et hépatique

Le métabolisme du thalidomide par le système du cytochrome P450 est minime et le thalidomide sous forme inchangée n'est pas éliminé par voie rénale. Les mesures de la fonction rénale (Cl<sub>C</sub>) et de la fonction hépatique (paramètres sanguins) indiquent un effet minime de ces fonctions sur la pharmacocinétique du thalidomide. De ce fait, le métabolisme du thalidomide n'est pas susceptible d'être modifié en cas d'insuffisance hépatique ou rénale. Les données chez des patients atteints d'insuffisance rénale terminale semblent indiquer l'absence d'effet de la fonction rénale sur la pharmacocinétique du thalidomide. Cependant, les métabolites pharmacologiquement actifs étant éliminés dans les urines, il est recommandé de surveiller étroitement la survenue d'effets indésirables chez les patients présentant une insuffisance rénale sévère.

#### **5.3 Données de sécurité préclinique**

Chez le chien mâle, après une année d'administration, des bouchons biliaires dans les canalicules ont été observés à des expositions supérieures à 1,9 fois l'exposition humaine.

Une diminution du nombre de plaquettes a été observée dans les études menées sur la souris et le rat. Cette diminution semble être liée au thalidomide et a été observée à des expositions supérieures à 2,4 fois l'exposition humaine. Cette diminution n'a pas induit de signes cliniques.

Dans une étude d'un an menée sur des chiens, on a observé une hypertrophie et/ou une coloration bleuâtre des glandes mammaires et un cycle oestral prolongé chez les femelles soumises à des expositions de respectivement 1,8 fois l'exposition humaine ou supérieures à 3,6 fois l'exposition humaine. La pertinence pour les êtres humains est inconnue.

L'effet du thalidomide sur la fonction thyroïdienne a été évalué chez des rats et des chiens. Aucun effet n'a été observé chez les chiens. Toutefois, une baisse apparente liée à la dose des taux de T4 libre et totale a été observée chez les rats, plus particulièrement chez les femelles.

Aucun effet mutagène ni génotoxique n'a été mis en évidence lors des essais de génotoxicité menés sur le thalidomide. Aucune preuve de cancérogénicité n'a été observée après une exposition d'environ 15, 13 et 39 fois la dose de départ recommandée chez les souris, les rats mâles et les rats femelles respectivement.

L'effet tératogène du thalidomide chez l'animal dépend des espèces. Le thalidomide est tératogène chez l'homme.

Une étude sur les lapins n'a démontré aucun effet sur les indices de fertilité chez les mâles ou les femelles, bien qu'une dégénérescence des testicules ait été observée chez les mâles.

Une étude péri- et postnatale menée sur les lapins et évaluant le thalidomide administré à des doses allant jusqu'à 500 mg/kg/jour a provoqué des avortements, une augmentation du nombre de mort-nés et une baisse de viabilité de la descendance pendant l'allaitement. Chez les lapins dont la mère a reçu du thalidomide, on a observé une hausse de la fréquence des avortements, un ralentissement de la prise de poids, des troubles d'apprentissage et de mémoire, une baisse de fertilité et une baisse d'indice de gestation.

## **6. DONNÉES PHARMACEUTIQUES**

### **6.1 Liste des excipients**

Contenu des gélules  
Amidon prégelatinisé  
Stéarate de magnésium

Enveloppe des gélules  
Gélatine  
Dioxyde de titane (E171)

Encre d'impression  
Gomme laque  
Oxyde de fer noir (E172)  
Propylène glycol

### **6.2 Incompatibilités**

Sans objet.

### **6.3 Durée de conservation**

5 ans

### **6.4 Précautions particulières de conservation**

Ce médicament ne nécessite pas de précautions particulières de conservation.

### **6.5 Nature et contenu de l'emballage extérieur**

Plaquettes thermoformées PVC/PCTFE/aluminium contenant 14 gélules.

Tailles de conditionnement : 28 gélules (deux plaquettes thermoformées) dans un étui « portefeuille ».

### **6.6 Précautions particulières d'élimination et manipulation**

Les gélules ne doivent pas être ouvertes ou écrasées. Si de la poudre de thalidomide entre en contact avec la peau, laver immédiatement et abondamment la peau au savon et à l'eau. En cas de contact avec les muqueuses, rincer abondamment à l'eau.

Retourner toutes les gélules non utilisées au pharmacien à la fin du traitement.

**7. TITULAIRE DE L'AUTORISATION DE MISE SUR LE MARCHÉ**

Celgene Europe Limited  
1 Longwalk Road  
Stockley Park  
Uxbridge  
UB11 1DB  
Royaume-Uni

**8. NUMÉRO(S) D'AUTORISATION DE MISE SUR LE MARCHÉ**

EU/1/08/443/001

**9. DATE DE PREMIÈRE AUTORISATION/DE RENOUVELLEMENT DE L'AUTORISATION**

Date de première autorisation : 16 avril 2008

Date du dernier renouvellement : 18 décembre 2012

**10. DATE DE MISE À JOUR DU TEXTE**

Des informations détaillées sur ce médicament sont disponibles sur le site internet de l'Agence européenne des médicaments <http://www.ema.europa.eu>.

# **Theralite™ operating instructions**

# Theralite

INSTRUCTIONS FOR USE  
GEBRAUCHSANWEISUNG  
INSTRUCTIONS D'UTILISATION  
ISTRUZIONI PER L'USO  
INSTRUCCIONES DE USO  
BRUKSANVISNING  
BRUKSANVISNING  
KÄYTTÖOHJEET  
BRUKSANVISNING  
INSTRUÇÕES DE UTILIZAÇÃO  
GEBRUIKSAANWIJZING  
ΟΔΗΓΙΕΣ ΧΡΗΣΗΣ  
INSTRUKCJA UŻYCIA  
KULLANIM TALİMATLARI

Covered by one or several of the following patents:  
US 4 935 141, US 5 165 728, EP 365 787, EP 442 310,  
other patents pending.

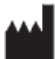

Gambro Dialysatoren GmbH  
D-72379 Hechingen  
Germany

N50 224 rev 001  
Date of issue: 12/2008

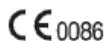

© Copyright Gambro Dialysatoren GmbH

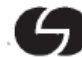

**GAMBRO®**

## INFORMATIONS GÉNÉRALES

### INDICATIONS

Le dialyseur Theralite est uniquement destiné à la purification du sang, en mode hémodialyse, dans le cas de maladies où l'élimination de composants du plasma présentant des poids moléculaires allant jusqu'à 45 kDa est indiquée.

**AVERTISSEMENT !** Le dialyseur Theralite est à usage unique. La réutilisation de ce dialyseur peut endommager sérieusement le produit et entraîner un danger pour le patient.

**ATTENTION !** Le dialyseur Theralite doit être utilisé uniquement sous la surveillance d'un médecin qui doit vérifier que les indications du dispositif sont adaptées au patient.

### CONTRE-INDICATIONS

Le dialyseur Theralite n'est pas conçu pour être utilisé en mode hémofiltration ou hémodiafiltration.

Le dialyseur Theralite est contre-indiqué pour un usage pédiatrique et pour le traitement régulier de l'insuffisance rénale chronique.

Le traitement avec le dialyseur Theralite pendant une longue période risque de diminuer les protéines essentielles et de générer une hypoalbuminémie.

**ATTENTION !** Si des complications affectant la stabilité clinique du patient apparaissent, le traitement doit être interrompu.

### DESCRIPTION DU DISPOSITIF

Consulter le tableau des spécifications dans la section Performances.

### DÉFINITION DES TERMES

#### UTILISÉS DANS CE MANUEL

**AVERTISSEMENT !** indique à l'utilisateur de ne pas entreprendre une action spécifique risquant d'entraîner un éventuel danger qui, s'il est ignoré, peut entraîner un effet indésirable, une blessure ou la mort.

**ATTENTION !** indique à l'utilisateur d'entreprendre une action spécifique pour éviter un éventuel danger qui, s'il est ignoré, peut entraîner un effet indésirable pour le patient ou l'équipement.

**REMARQUE !** rappelle à l'utilisateur les fonctions de traitement normales et l'action appropriée dans un cas particulier.

### AVERTISSEMENTS

#### GÉNÉRAUX ET PRÉCAUTIONS

**AVERTISSEMENT !** Le dialyseur Theralite ne doit pas être utilisé en hémodiafiltration (HDF) ou en hémofiltration (HF) en raison de la haute perméabilité des protéines à poids moléculaire important, telle que l'albumine. Ces propriétés spécifiques exigent de contrôler la perte protéique afin d'éviter la diminution involontaire des concentrations plasmatiques de substances telle que l'albumine. Par conséquent, la concentration de l'albumine plasmatique doit être surveillée. Si besoin, administrer un complément d'albumine.

**ATTENTION !** Les paramètres de traitement doivent être choisis dans les limites indiquées dans le tableau des spécifications du dialyseur Theralite.

**AVERTISSEMENT !** Le dialyseur Theralite doit être utilisé uniquement avec un générateur de dialyse pouvant contrôler de manière précise la présence d'air dans le circuit sang (détecteur d'air) et la présence de sang dans le circuit dialysat (détecteur de fuite de sang).

**AVERTISSEMENT !** Le dialyseur Theralite doit uniquement être utilisé avec un générateur de dialyse permettant de contrôler et de surveiller le taux d'ultrafiltration. Il convient de faire particulièrement attention à la précision de l'équilibre des liquides et aux autres instructions de sécurité mentionnées dans le manuel du générateur (par exemple, restriction du poids du patient). Le poids du patient doit être surveillé à intervalles réguliers.

**ATTENTION !** La législation fédérale américaine n'autorise la vente de ce dispositif aux États-Unis que par un médecin ou sur prescription médicale.

**ATTENTION !** Les patients munis d'un équipement de maintien des fonctions vitales doivent être surveillés visuellement par du personnel médical compétent dans la mesure où un danger ne déclenchant pas d'alarme peut survenir à tout moment. Une surveillance constante de tous les paramètres vitaux doit être assurée tout au long du traitement pour réduire le risque d'effets indésirables et d'effets secondaires (par exemple, coagulation, saignements et embolie gazeuse). Régler tous les paramètres de traitement sur la plage de valeurs indiquée par le médecin en fonction des besoins spécifiques du patient et de son niveau de tolérance.

**AVERTISSEMENT !** La taille, le poids, l'état nutritionnel (valeur d'albumine plasmatique), l'urémie, l'état cardiaque et la condition physique générale du patient doivent être évalués par le médecin prescripteur avant chaque traitement. Le choix du dialyseur capillaire et de l'équipement associé ainsi que les paramètres de traitement sont sous la responsabilité du médecin.

### ÉVÉNEMENTS INDÉSIRABLES

Certains effets indésirables peuvent survenir en raison de facteurs opérationnels associés au traitement. En conséquence, le choix de la configuration du dialyseur ainsi que les paramètres de traitement doivent être adaptés aux caractéristiques du patient (taille, poids, antécédents cardiovasculaires, tolérance à la thérapie, etc.) et à ses exigences cliniques. Il est nécessaire de respecter les procédures de préparation et d'amorçage, la maîtrise de l'élimination des fluides, de l'équilibre électrolytique, de l'ajustement de la valeur de pH du dialysat, de l'anticoagulation, des flux sanguins et de dialysat, et de surveiller l'ensemble des paramètres de traitement pour éviter les effets secondaires associés à hémodialyse.

Afin de réduire la contamination bactérienne et endotoxique, il convient de surveiller que les solutions pour hémodialyse et l'eau pour dilution des solutions concentrées pour hémodialyse sont conformes aux normes en vigueur telles que ANSI/AAMI RD62-2001/Ph.Eur

Dans de rares cas (par exemple pour les patients ayant des antécédents d'allergies à certaines substances), des réactions d'hypersensibilité risquent de se produire au cours de la dialyse, en particulier au début du traitement. Dans les cas graves, il faut immédiatement arrêter la dialyse et entreprendre une intervention médicale adéquate. Le sang du circuit extracorporel ne doit pas être restitué au patient. Si nécessaire, administrer une solution de substitution appropriée.

### GARANTIES ET LIMITES DE RESPONSABILITÉ

Le fabricant garantit que le dialyseur capillaire a été fabriqué conformément aux spécifications et aux bonnes pratiques de fabrication, aux normes applicables à l'industrie et aux exigences réglementaires.

Sur indication du numéro de lot, le fabricant s'engage à remplacer ou rembourser les produits présentant un défaut de fabrication, apparu avant la date de péremption.

Date de péremption : se reporter aux informations figurant sur l'étiquette de l'emballage.

La garantie du paragraphe ci-dessus s'applique en lieu et place de tout autre garantie, écrite ou orale, expresse ou implicite, légale ou autre, et aucune garantie, commerciale, technique ou différente de celles spécifiées précédemment ne saurait être prise en compte.

Le recours indiqué ci-dessus relatif aux défauts de fabrication est le seul recours possible pour toute personne en ce qui concerne les défauts que présente le dialyseur, et le fabricant décline toute responsabilité en cas de pertes, dommages, blessures ou dépenses fortuits ou consécutifs imputables directement ou indirectement à l'utilisation du dialyseur, qu'il s'agisse d'un défaut ou de tout autre cause.

Le fabricant décline toute responsabilité en cas d'utilisation ou de manipulation inappropriées, de non-respect des avertissements, indications et instructions figurant sur l'étiquette, de dommages survenant après la libération du dialyseur par le fabricant avant utilisation pour vérifier son bon fonctionnement, ainsi que toute garantie offerte par les distributeurs ou revendeurs indépendants.

# INSTRUCTIONS D'UTILISATION

## PRÉPARATION

**AVERTISSEMENT !** Ne pas utiliser si l'emballage est endommagé ou si les connecteurs, les portes ou les joints d'étanchéité ne sont pas correctement positionnés.

**AVERTISSEMENT !** Une technique aseptique est requise tout au long de la préparation de la dialyse et du traitement pour éviter toute contamination.

- 1) Retirer les bouchons de protection des connexions du compartiment sang ; fermer celles du compartiment dialysat soit avec les bouchons soit avec les raccords de dialysat pour éviter les fuites.
- 2) Mettre le dialyseur en position verticale, mettre en place les lignes à sang sur le générateur et sur le dialyseur, la ligne artérielle étant sur la partie inférieure du dialyseur.
- 3) Préparer et connecter une poche de sérum physiologique à la ligne artérielle.
- 4) Placer de manière aseptique l'extrémité libre de la ligne veineuse dans un récipient vide.
- 5) Vérifier que les lignes artérielle et veineuse ne sont pas clampées et que toutes les connexions sont fermées.
- 6) Démarrer la pompe à sang à 100 ml/min et remplir le compartiment sang. Éliminer au maximum l'air du compartiment sang, si besoin en clampant et déclampant la ligne veineuse périodiquement.
- 7) Retourner le dialyseur (extrémité artérielle vers le haut).
- 8) Raccorder les tubulures du dialysat au dialyseur (si ce n'est déjà fait) pour un débit à contre-courant.
- 9) Activer le débit de la solution de dialyse et éliminer tout l'air du compartiment dialysat du dialyseur.
- 10) Le dialyseur est désormais prêt à être connecté au patient.

**AVERTISSEMENT !** Un débit d'ultrafiltration à zéro présente le risque d'injecter le liquide de dialyse dans la circulation sanguine et/ou d'obstruer le circuit sanguin.

## INSTRUCTIONS DE FONCTIONNEMENT

**AVERTISSEMENT !** Il est recommandé d'administrer des anticoagulants pour prévenir la formation de caillots dans le circuit extracorporel. L'administration d'anticoagulants doit être adaptée aux besoins du patient et contrôlée sous la surveillance d'un médecin.

**ATTENTION !** Il est recommandé d'administrer une dose de charge d'héparine au patient 2 à 5 minutes avant le début du traitement.

**ATTENTION !** Une fois l'amorçage du compartiment dialysat effectué, la solution dans le compartiment sang peut contenir du bicarbonate. Au cours de la connexion au patient, le volume et le débit de perfusion de cette solution doivent être pris en compte, en particulier chez les patients présentant une acidose métabolique. Vérifier que la valeur du pH du dialysat est appropriée au patient.

- 1) Connecter la ligne artérielle au dispositif d'accès vasculaire.
- 2) Éliminer tout clamp obstructif.

- 3) Démarrer la pompe à sang.
- 4) Éliminer la solution d'amorçage au maximum.
- 5) Arrêter la pompe à sang.
- 6) Connecter la ligne veineuse au dispositif d'accès vasculaire du patient.
- 7) Démarrer la pompe à sang et augmenter le débit sanguin jusqu'à la valeur prescrite.

## FIN DU TRAITEMENT

- 1) Connecter la ligne artérielle à une poche de solution de sérum physiologique et régler le débit sanguin pour restituer le sang au patient.
- 2) Lorsque le volume de sang requis a été restitué au patient, arrêter la pompe à sang et déconnecter le patient.
- 3) Suivre les instructions du manuel d'utilisation du générateur de dialyse pour vider et déconnecter le dialyseur et les lignes à sang.

**AVERTISSEMENT !** Ne pas désactiver le système de détection d'air de la machine tant que le patient n'est pas déconnecté.

## EFFETS SECONDAIRES

Si une fuite interne de sang est observée, l'utilisateur doit interrompre le traitement et remplacer le dialyseur.

**AVERTISSEMENT !** Ne pas restituer le sang au patient dans la mesure où il a peut-être été contaminé par la solution de dialyse. Si besoin, administrer au patient une solution de substitution appropriée pour compenser la perte de sang.

Si une fuite externe de sang est observée, resserrer les connexions ou remplacer le dialyseur. Si besoin, administrer au patient une solution de substitution appropriée pour compenser la perte de sang.

Si une fuite dans le compartiment dialysat est observée, l'utilisateur doit vérifier que les raccords de dialysat sont mis en place correctement ou il doit stopper le traitement et remplacer le dialyseur. Au besoin, administrer une solution de substitution appropriée au patient pour compenser le déséquilibre hydrique.

La pénétration d'air dans le circuit sang extracorporel est susceptible de provoquer une embolie gazeuse. Ceci représente un danger pour le patient. Pour réduire le risque d'embolie gazeuse, il est recommandé de surveiller constamment le circuit de sang extracorporel, à la fois visuellement et à l'aide d'un détecteur d'air.

Le strict respect des procédures recommandées par le fabricant facilite l'élimination d'air et empêche l'accumulation d'air dans le dialyseur avant le traitement. Si de l'air pénètre ou est détecté dans le dialyseur au cours des phases d'amorçage et qu'il est impossible de le vider à l'aide de sérum physiologique supplémentaire, le dialyseur doit être remplacé.

En cas de coagulation à l'intérieur du dialyseur, le dialyseur ainsi que les lignes à sang doivent être remplacés. Rincer les dispositifs d'accès vasculaire conformément aux procédures habituelles du centre. Jeter le dialyseur et les lignes à sang.

**AVERTISSEMENT !** Ne pas restituer le sang au patient.

**AVERTISSEMENT !** Pour l'élimination des médicaments par le dialyseur, des considérations spécifiques sont requises (p.ex. agents chimiothérapeutiques). Les propriétés spécifiques du produit peuvent entraîner une élimination augmentée de médicaments administrés présentant un poids moléculaire plus élevé (p. ex. hirudine, insuline). Le cas échéant, le dosage doit être ajusté.

## Schéma de circuit habituel

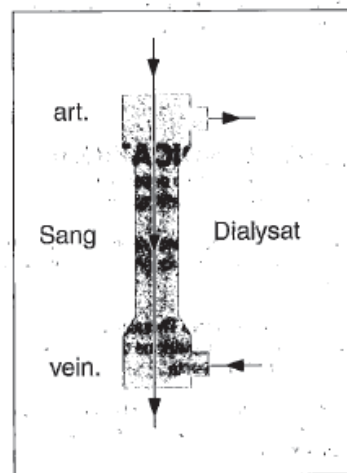

## TABLEAUX DES PERFORMANCES AVEC TRADUCTIONS RESPECTIVES VOIR DERNIÈRES PAGES

(De plus amples informations sur les méthodes de test, les caractéristiques des performances in vivo et les tests toxicologiques sont disponibles sur demande).

# TRANSLATIONS

| ENGLISH                                                                                                                                                                                                                                                  | DEUTSCH                                                                                                                                                                                                                                             | FRANCAIS                                                                                                                                                                                                                                            | ITALIANO                                                                                                                                                                                                                                                 |
|----------------------------------------------------------------------------------------------------------------------------------------------------------------------------------------------------------------------------------------------------------|-----------------------------------------------------------------------------------------------------------------------------------------------------------------------------------------------------------------------------------------------------|-----------------------------------------------------------------------------------------------------------------------------------------------------------------------------------------------------------------------------------------------------|----------------------------------------------------------------------------------------------------------------------------------------------------------------------------------------------------------------------------------------------------------|
| 1 UF coef. in vitro [ml/(h·mmHg)]                                                                                                                                                                                                                        | UF-Koeff. in vitro [ml/(h·mmHg)]                                                                                                                                                                                                                    | Coef. d'UF in vitro [ml/(h·mmHg)]                                                                                                                                                                                                                   | Coef. UF in vitro [ml/(h·mmHg)]                                                                                                                                                                                                                          |
| 2 Priming volume in vitro (ml)                                                                                                                                                                                                                           | Füllvolumen in vitro (ml)                                                                                                                                                                                                                           | Volume d'amorçage in vitro (ml)                                                                                                                                                                                                                     | Volume di priming in vitro (ml)                                                                                                                                                                                                                          |
| 3 Flow resistance blood compartment (mmHg)/max. values, UF = 0 ml/min<br>Q <sub>1</sub> = 200 ml/min, Q <sub>2</sub> = 300 ml/min<br>Q <sub>3</sub> = 400 ml/min, Q <sub>4</sub> = 500 ml/min (Bovine blood, hematocrit = 32 %, protein = 60 g/l, 37 °C) | Flusswiderstand im Blutkompartiment (mmHg)/max. Werte, UF = 0 ml/min<br>Q <sub>1</sub> = 200 ml/min, Q <sub>2</sub> = 300 ml/min<br>Q <sub>3</sub> = 400 ml/min, Q <sub>4</sub> = 500 ml/min (Rinderblut, Hämokrit = 32 %, Protein = 60 g/l, 37 °C) | Pertes de pression côté sang (mmHg)/valeurs max., UF = 0 ml/min<br>Q <sub>1</sub> = 200 ml/min, Q <sub>2</sub> = 300 ml/min<br>Q <sub>3</sub> = 400 ml/min, Q <sub>4</sub> = 500 ml/min (sang bovin, hématocrite = 32 %, protéines = 60 g/l, 37 °C) | Caduta di pressione, lato ematico (mmHg)/max. valori, UF = 0 ml/min<br>Q <sub>1</sub> = 200 ml/min, Q <sub>2</sub> = 300 ml/min<br>Q <sub>3</sub> = 400 ml/min, Q <sub>4</sub> = 500 ml/min (sangue bovino, ematocrito = 32 %, proteine = 60 g/l, 37 °C) |
| 4 Flow resistance dialysate compartment (mmHg)/max. values<br>Q <sub>1</sub> = 300 ml/min Q <sub>2</sub> = 500 ml/min<br>Q <sub>3</sub> = 800 ml/min (Dialysat, 37 °C)                                                                                   | Flusswiderstand im Dialysatkompartiment (mmHg)/max. Werte<br>Q <sub>1</sub> = 300 ml/min Q <sub>2</sub> = 500 ml/min<br>Q <sub>3</sub> = 800 ml/min (Dialysat, 37 °C)                                                                               | Pertes de pression côté dialysat (mmHg)/valeurs max.<br>Q <sub>1</sub> = 300 ml/min Q <sub>2</sub> = 500 ml/min<br>Q <sub>3</sub> = 800 ml/min (dialysat, 37 °C)                                                                                    | Caduta di pressione, lato dialisato (mmHg)/max. valori<br>Q <sub>1</sub> = 300 ml/min Q <sub>2</sub> = 500 ml/min<br>Q <sub>3</sub> = 800 ml/min (dialisato, 37 °C)                                                                                      |
| 5 Max. transmembrane pressure (mmHg)                                                                                                                                                                                                                     | Max. Transmembrandruck (mmHg)                                                                                                                                                                                                                       | Pression transmembranaire max. (mmHg)                                                                                                                                                                                                               | Massima pressione di transmembrana (mmHg)                                                                                                                                                                                                                |
| 6 Range of blood flow rates (ml/min)                                                                                                                                                                                                                     | Bereich der Blutflussraten (ml/min)                                                                                                                                                                                                                 | Plage de débits sanguins (ml/min)                                                                                                                                                                                                                   | Min-max flusso ematico (ml/min)                                                                                                                                                                                                                          |
| 7 Range of dialysate flow rates (ml/min)                                                                                                                                                                                                                 | Bereich der Dialysatflussraten (ml/min)                                                                                                                                                                                                             | Plage de débits de dialysat (ml/min)                                                                                                                                                                                                                | Min-max di flusso del dialisato (ml/min)                                                                                                                                                                                                                 |
| 8 Residual blood volume (ml)                                                                                                                                                                                                                             | Restblutvolumen (ml)                                                                                                                                                                                                                                | Volume de sang résiduel (ml)                                                                                                                                                                                                                        | Volume ematico residuo (ml)                                                                                                                                                                                                                              |
| 9 Fluid volumes needed for priming and rinsing (ml)                                                                                                                                                                                                      | Benötigte Flüssigkeitsmengen für den Füll- und Spülvorgang (ml)                                                                                                                                                                                     | Volume de liquide nécessaire pour l'amorçage et le rinçage (ml)                                                                                                                                                                                     | Volumi di fluido necessari per il riempimento e il risciacquo (ml)                                                                                                                                                                                       |
| 10 Membrane<br>Effective membrane area (m <sup>2</sup> )<br>Wall thickness (µm)<br>Inner diameter (µm)                                                                                                                                                   | Membran<br>Effektive Membranoberfläche (m <sup>2</sup> )<br>Wandstärke (µm)<br>Innendurchmesser (µm)                                                                                                                                                | Membrane<br>Surface utile (m <sup>2</sup> )<br>Épaisseur de la paroi (µm)<br>Diamètre interne (µm)                                                                                                                                                  | Membrana<br>Superficie effettiva della membrana (m <sup>2</sup> )<br>Spessore (µm)<br>Diametro interno (µm)                                                                                                                                              |
| 11 Sterilizing agent<br>Sterile barrier<br>Status of device                                                                                                                                                                                              | Sterilisationsart<br>Sterilbarriere<br>Gerätestatus                                                                                                                                                                                                 | Agent stérilisant<br>Barrière stérile<br>Statut du dispositif                                                                                                                                                                                       | Agente sterilizzante<br>Barriera sterile<br>Stato del dispositivo                                                                                                                                                                                        |
| 12 Components<br>Membrane<br>Packing material<br>Housing and Caps<br>O-rings<br>Protective Caps                                                                                                                                                          | Komponenten<br>Membran<br>Verpackungsmasse<br>Gehäuse und Kappen<br>O-Ringe<br>Schutzkappen                                                                                                                                                         | Composants<br>Membrane<br>Matériau d'emballage<br>Coque et capuchons<br>Joints toriques<br>Embosses de protection                                                                                                                                   | Componenti<br>Membrana<br>Materiale sigillante<br>Contenitore e tappi di chiusura<br>Guarnizioni di tenuta<br>Tappi protettivi                                                                                                                           |
| 13 Recommended connectors for dialysate ports                                                                                                                                                                                                            | Empfohlene Konnektoren für Dialysatanschlüsse                                                                                                                                                                                                       | Raccords recommandés pour les connexions au compartiment dialysat                                                                                                                                                                                   | Connettori consigliati per gli ingressi dialisato                                                                                                                                                                                                        |
| 14 Recommended connectors for blood ports                                                                                                                                                                                                                | Empfohlene Konnektoren für Blutanschlüsse                                                                                                                                                                                                           | Raccords recommandés pour les connexions au compartiment sang                                                                                                                                                                                       | Connettori consigliati per gli ingressi sangue                                                                                                                                                                                                           |
| 15 Recommended storage conditions (°C)                                                                                                                                                                                                                   | Empfohlene Lagerbedingungen (°C)                                                                                                                                                                                                                    | Conditions de stockage recommandées (°C)                                                                                                                                                                                                            | Condizioni consigliate per la conservazione (°C / °F)                                                                                                                                                                                                    |
| 16 Hemodialysis (HD) Q <sub>1</sub> = 500 ml/min, UF = 0 ml/min, Measured acc. to EN 1283/ISO 8637, Clearance in vitro (ml/min) ± 10 %                                                                                                                   | Hämodialyse (HD) Q <sub>1</sub> = 500 ml/min, UF = 0 ml/min, ermittelt gemäß EN 1283/ISO 8637, Clearance in vitro (ml/min) ± 10 %                                                                                                                   | Hémodialyse (HD) Q <sub>1</sub> = 500 ml/min, UF = 0 ml/min, mesure conformément à la norme EN 1283 / ISO 8637, clairance in vitro (ml/min) ± 10 %                                                                                                  | Emodialisi (HD) Q <sub>1</sub> = 500 ml/min, UF = 0 ml/min, misurato in base alla Norma EN 1283 / ISO 8637, clearance in vitro (ml/min) ± 10 %                                                                                                           |
| 17 Sieving coefficient in vitro, Measured acc. to EN 1283/ISO 8637 (± 20 %), bovine plasma, 60 g/l, 37 °C                                                                                                                                                | Siebkoefizient in vitro, ermittelt gemäß EN 1283/ISO 8637 (± 20 %), Rinderplasma, 60 g/l, 37 °C                                                                                                                                                     | Coefficient de tamisage in vitro, mesuré conformément à la norme EN 1283 / ISO 8637 (± 20 %), plasma bovin, 60 g/l, 37 °C                                                                                                                           | Coefficiente di setacciatura in vitro, misurato in base a EN 1283 / ISO 8637 (± 20 %), plasma bovino, 60 g/l, 37 °C                                                                                                                                      |
| 18 Albumin loss (HD) in vitro, Q <sub>1</sub> = 200 ml/min, Q <sub>2</sub> = 500 ml/min, UF = 0 ml/min, bovine plasma, 60 g/l, 37 °C, Albumin level 20-30 g/l                                                                                            | Albuminverlust (HD) in vitro, Q <sub>1</sub> = 200 ml/min, Q <sub>2</sub> = 500 ml/min, UF = 0 ml/min, Rinderplasma, 60 g/l, 37 °C, Albuminpegel 20-30 g/l                                                                                          | Perte d'albumine (HD) in vitro, Q <sub>1</sub> = 200 ml/min, Q <sub>2</sub> = 500 ml/min, UF = 0 ml/min, plasma bovin, 60 g/l, 37 °C, taux d'albumine 20-30 g/l                                                                                     | Perdita di albumina (HD) in vitro, Q <sub>1</sub> = 200 ml/min, Q <sub>2</sub> = 500 ml/min, UF = 0 ml/min, Plasma bovino, 60 g/l, 37 °C, albumina 20-30 g/l                                                                                             |

| ESPAÑOL                                                                                                                                                                                                                                                                  | SVENSKA                                                                                                                                                                                                                                        | DANSK                                                                                                                                                                                                                                        | SUOMI                                                                                                                                                                                                                                            |
|--------------------------------------------------------------------------------------------------------------------------------------------------------------------------------------------------------------------------------------------------------------------------|------------------------------------------------------------------------------------------------------------------------------------------------------------------------------------------------------------------------------------------------|----------------------------------------------------------------------------------------------------------------------------------------------------------------------------------------------------------------------------------------------|--------------------------------------------------------------------------------------------------------------------------------------------------------------------------------------------------------------------------------------------------|
| 1 Coeficiente de ultrafiltración in vitro [ml/(h·mmHg)]                                                                                                                                                                                                                  | UF-koef. in vitro [ml/(h·mmHg)]                                                                                                                                                                                                                | UF coef. in vitro [ml/(h·mmHg)]                                                                                                                                                                                                              | UF-kerroin in vitro [ml/(h·mmHg)]                                                                                                                                                                                                                |
| 2 Volumen de cebado in vitro (ml)                                                                                                                                                                                                                                        | Primingsvolumen in vitro (ml)                                                                                                                                                                                                                  | Primingsvolumen, in vitro (ml)                                                                                                                                                                                                               | Eestäyttömäärä in vitro (ml)                                                                                                                                                                                                                     |
| 3 Compartimento de sangre, resistencia al flujo (mmHg)/valores máx., UF = 0 ml/min<br>Q <sub>1</sub> = 200 ml/min, Q <sub>2</sub> = 300 ml/min<br>Q <sub>3</sub> = 400 ml/min, Q <sub>4</sub> = 500 ml/min (sangre bovina, hematocrito = 32 %, proteína = 60 g/l, 37 °C) | Flödesmotstånd på blodside (mmHg)/max. värden, UF = 0 ml/min<br>Q <sub>1</sub> = 200 ml/min, Q <sub>2</sub> = 300 ml/min<br>Q <sub>3</sub> = 400 ml/min, Q <sub>4</sub> = 500 ml/min (bovint blod, hematokrit = 32 %, protein = 60 g/l, 37 °C) | Flowmodstand i blodkammer (mmHg)/maks. værdier, UF = 0 ml/min<br>Q <sub>1</sub> = 200 ml/min, Q <sub>2</sub> = 300 ml/min<br>Q <sub>3</sub> = 400 ml/min, Q <sub>4</sub> = 500 ml/min (okseblod, hæmatokrit = 32 %, protein = 60 g/l, 37 °C) | Virtausvastus veriosassa (mmHg)/enimmäisarvot, UF = 0 ml/min<br>Q <sub>1</sub> = 200 ml/min, Q <sub>2</sub> = 300 ml/min<br>Q <sub>3</sub> = 400 ml/min, Q <sub>4</sub> = 500 ml/min (naudan veri, hematokrit = 32 %, proteiini = 60 g/l, 37 °C) |
| 4 Compartimento del líquido de diálisis, resistencia al flujo (mmHg)/valores máx., UF = 0 ml/min<br>Q <sub>1</sub> = 300 ml/min Q <sub>2</sub> = 500 ml/min<br>Q <sub>3</sub> = 800 ml/min (líquido de diálisis, 37 °C)                                                  | Flödesmotstånd på dialysatsidesida (mmHg)/max. värden<br>Q <sub>1</sub> = 300 ml/min Q <sub>2</sub> = 500 ml/min<br>Q <sub>3</sub> = 800 ml/min (Dialysat, 37 °C)                                                                              | Flowmodstand i dialysatkammer (mmHg)/maks. værdier<br>Q <sub>1</sub> = 300 ml/min Q <sub>2</sub> = 500 ml/min<br>Q <sub>3</sub> = 800 ml/min (dialysat, 37 °C)                                                                               | Virtausvastus ulkonesteosassa (mmHg)/enimmäisarvot<br>Q <sub>1</sub> = 300 ml/min Q <sub>2</sub> = 500 ml/min<br>Q <sub>3</sub> = 800 ml/min (ulkoneste, 37 °C)                                                                                  |
| 5 Presión transmembrana máxima (mmHg)                                                                                                                                                                                                                                    | Max. transmembrantryck (mmHg)                                                                                                                                                                                                                  | Maks. transmembrantryk (mmHg)                                                                                                                                                                                                                | Traagennäppäminen enimmäispaine (mmHg)                                                                                                                                                                                                           |
| 6 Rango de flujos de sangre (ml/min)                                                                                                                                                                                                                                     | Intervall för blodflödeshastigheter (ml/min)                                                                                                                                                                                                   | Intervall for blodflowrater (ml/min)                                                                                                                                                                                                         | Verin virtausnopeusalue (ml/min)                                                                                                                                                                                                                 |
| 7 Rango de flujos del líquido de diálisis (ml/min)                                                                                                                                                                                                                       | Intervall för dialysatflödeshastigheter (ml/min)                                                                                                                                                                                               | Interval for dialysatflowrater (ml/min)                                                                                                                                                                                                      | Ulkonestein virtausnopeusalue (ml/min)                                                                                                                                                                                                           |
| 8 Volumen de sangre residual (ml)                                                                                                                                                                                                                                        | Residualblodvolumen (ml)                                                                                                                                                                                                                       | Blodresidualvolumen (ml)                                                                                                                                                                                                                     | Jäännösverimäärä (ml)                                                                                                                                                                                                                            |
| 9 Volúmenes de líquido necesario para el cebado y el lavado (ml)                                                                                                                                                                                                         | Vätskevolyum vid priming och sköljning (ml)                                                                                                                                                                                                    | Påkrævede væskevolumener til priming og rensning (ml)                                                                                                                                                                                        | Eestäyttö- ja huuhteluun tarvittavat tarvittavat neste määrät (ml)                                                                                                                                                                               |
| 10 Membrana<br>Área efectiva de la membrana (m <sup>2</sup> )<br>Espesor de la pared (µm)<br>Diámetro interior (µm)                                                                                                                                                      | Membran<br>Effektiv membranarea (m <sup>2</sup> )<br>Väggjocklek (µm)<br>Innerradien (µm)                                                                                                                                                      | Membran<br>Effektivt membranareal (m <sup>2</sup> )<br>Vægtykkelse (µm)<br>Indervæg diameter (µm)                                                                                                                                            | Kalvo<br>Tehokainen kalvoalue (m <sup>2</sup> )<br>Seinämän paksuus (µm)<br>Sisäkaikale (µm)                                                                                                                                                     |
| 11 Agente de esterilización<br>Barrera estéril<br>Estado del dispositivo                                                                                                                                                                                                 | Steriliseringssmedel<br>Steril barriär<br>Enhetsens tillstånd                                                                                                                                                                                  | Steriliseringsmiddel<br>Steril barriere<br>Produktstatus                                                                                                                                                                                     | Sterilointilaine<br>Steriili suljuminen<br>Laitteen tila                                                                                                                                                                                         |
| 12 Componentes<br>Membrana<br>Material de fijación<br>Carcasa y tapones<br>Juntares tóricas<br>Tapones de protección                                                                                                                                                     | Komponenter<br>Membran<br>Limmaterial<br>Filterhus och korkar<br>O-ringar<br>Skyddskorkar                                                                                                                                                      | Komponenter<br>Membran<br>Støbemateriale<br>Kabinnet og hæfter<br>O-ringe<br>Beskyttelsestæpper                                                                                                                                              | Oset<br>Kalvo<br>Tiivislmateriaali<br>Kotelo ja korkit<br>O-renkaat<br>Suojakorot                                                                                                                                                                |
| 13 Conectores recomendados para los puertos del líquido de diálisis                                                                                                                                                                                                      | Rekommenderade kopplingar för dialysatportar                                                                                                                                                                                                   | Anbefalede koblinger til dialysatporte                                                                                                                                                                                                       | Ulkonesteporttien suositellavat liittimet                                                                                                                                                                                                        |
| 14 Conectores recomendados para los puertos de la sangre                                                                                                                                                                                                                 | Rekommenderade kopplingar för blodportar                                                                                                                                                                                                       | Anbefalede koblinger til blodporte                                                                                                                                                                                                           | Veroporttien suositellavat liittimet                                                                                                                                                                                                             |
| 15 Condiciones de almacenamiento recomendadas (°C)                                                                                                                                                                                                                       | Rekommenderade förhållningsförhållanden (°C / °F)                                                                                                                                                                                              | Anbefalede opbevaringsforhold (°C / °F)                                                                                                                                                                                                      | Suosittelavat säilytysolosuhteet (°C / °F)                                                                                                                                                                                                       |
| 16 Hemodialysis (HD) Q <sub>1</sub> = 500 ml/min, UF = 0 ml/min, médo de conformidad con EN 1283 / ISO 8637, aclaramiento in vitro (ml/min) ± 10 %                                                                                                                       | Hemodialys (HD) Q <sub>1</sub> = 500 ml/min, UF = 0 ml/min, mátt enl. EN 1283/ISO 8637, clearance in vitro (ml/min) ± 10 %                                                                                                                     | Hæmodialys (HD) Q <sub>1</sub> = 500 ml/min, UF = 0 ml/min, mátt i henhold til EN 1283/ISO 8637, in vitro-clearance (ml/min) ± 10 %                                                                                                          | Hemodialyysi (HD) Q <sub>1</sub> = 500 ml/min, UF = 0 ml/min, mitattu EN 1283 / ISO 8637 -standardin mukaisesti, puhdistusain in vitro (ml/min) ± 10 %                                                                                           |
| 17 Sieving coefficient in vitro, médo de conformidad con EN 1283 / ISO 8637 (± 20 %), plasma bovino, 60 g/l, 37 °C                                                                                                                                                       | Sievingkoefizient in vitro, mátt enl. EN 1283 / ISO 8637 (± 20 %), bovin plasma, 60 g/l, 37 °C                                                                                                                                                 | Sieving-coefficient in vitro, mátt i henhold til EN 1283/ISO 8637 (± 20 %), okseplasma, 60 g/l, 37 °C                                                                                                                                        | Läpäisevyys in vitro, mitattu EN 1283 / ISO 8637 -standardin mukaisesti (± 20 %), naudan plasma, 60 g/l, 37 °C                                                                                                                                   |
| 18 Pérdida de albúmina (HD) in vitro, Q <sub>1</sub> = 200 ml/min, Q <sub>2</sub> = 500 ml/min, UF = 0 ml/min, Plasma bovino, 60 g/l, 37 °C, Nivel de albúmina 20-30 g/l                                                                                                 | Albuminiförlust (HD) in vitro, Q <sub>1</sub> = 200 ml/min, Q <sub>2</sub> = 500 ml/min, UF = 0 ml/min, bovin plasma, 60 g/l, 37 °C, Albuminivå 20-30 g/l                                                                                      | Albumintab (HD) in vitro, Q <sub>1</sub> = 200 ml/min, Q <sub>2</sub> = 500 ml/min, UF = 0 ml/min, okseplasma, 60 g/l, 37 °C, Albumininkoncentration 20-30 g/l                                                                               | Albumiinin menetyk (HD) in vitro, Q <sub>1</sub> = 200 ml/min, Q <sub>2</sub> = 500 ml/min, UF = 0 ml/min, naudan plasma, 60 g/l, 37 °C, Albumiinitaso 20-30 g/l                                                                                 |



# TRANSLATIONS

| NORSK                                                                                                                                                                                                                                                       | PORTUGUÉS                                                                                                                                                                                                                                                                   | NEDERLANDS                                                                                                                                                                                                                                               | ΕΛΛΗΝΙΚΑ                                                                                                                                                                                                                                                                 |
|-------------------------------------------------------------------------------------------------------------------------------------------------------------------------------------------------------------------------------------------------------------|-----------------------------------------------------------------------------------------------------------------------------------------------------------------------------------------------------------------------------------------------------------------------------|----------------------------------------------------------------------------------------------------------------------------------------------------------------------------------------------------------------------------------------------------------|--------------------------------------------------------------------------------------------------------------------------------------------------------------------------------------------------------------------------------------------------------------------------|
| 1 UF koef. in vitro [ml/(h·mmHg)]                                                                                                                                                                                                                           | coef. UF in vitro [ml/(h·mmHg)]                                                                                                                                                                                                                                             | UF coef. in vitro [ml/(h·mmHg)]                                                                                                                                                                                                                          | Συντελ. υπερδιήθησης in vitro [ml/(h·mmHg)]                                                                                                                                                                                                                              |
| 2 Primingvolum in vitro (ml)                                                                                                                                                                                                                                | Volume de preenchimento in vitro (ml)                                                                                                                                                                                                                                       | Primingvolum in vitro (ml)                                                                                                                                                                                                                               | Όγκος πλήρωσης in vitro (ml)                                                                                                                                                                                                                                             |
| 3 Flowmotstand bloddet (mmHg)/maks. verdier, UF = 0 ml/min<br>Q <sub>0</sub> = 200 ml/min, Q <sub>1</sub> = 300 ml/min,<br>Q <sub>2</sub> = 400 ml/min, Q <sub>3</sub> = 500 ml/min, (bovint blod,<br>hematokrit = 32 %, protein = 60 g/l, 37 °C)           | Compartmento de sangue de resistência ao fluxo (mmHg)/valores máx., UF = 0 ml/min<br>Q <sub>0</sub> = 200 ml/min, Q <sub>1</sub> = 300 ml/min,<br>Q <sub>2</sub> = 400 ml/min, Q <sub>3</sub> = 500 ml/min, (sangue bovino,<br>hematócrito = 32%, proteínas = 60 g/l, 37°C) | Flowresistente bloedcompartiment (mmHg)/max. waarden, UF = 0 ml/min<br>Q <sub>0</sub> = 200 ml/min, Q <sub>1</sub> = 300 ml/min,<br>Q <sub>2</sub> = 400 ml/min, Q <sub>3</sub> = 500 ml/min, (runderbloed,<br>hematocriet = 32 %, eiwit = 60 g/l, 37°C) | Αντίσταση ροής στο διαμέρισμα αίματος (mmHg)/μέγ. τιμές, UF = 0 ml/λεπτό<br>Q <sub>0</sub> = 200 ml/λεπτό, Q <sub>1</sub> = 300 ml/λεπτό,<br>Q <sub>2</sub> = 400 ml/λεπτό, Q <sub>3</sub> = 500 ml/λεπτό, (βόvino αίμα,<br>αιματοκρίτης = 32%, πρωτεΐνη = 60 g/l, 37°C) |
| 4 Flowmotstand dialyseveskedel (mmHg)/maks. verdier<br>Q <sub>0</sub> = 300 ml/min, Q <sub>1</sub> = 500 ml/min<br>Q <sub>2</sub> = 600 ml/min (Dialyseveske, 37 °C)                                                                                        | Compartmento do dialisante de resistência ao fluxo (mmHg)/valores máx.<br>Q <sub>0</sub> = 300 ml/min, Q <sub>1</sub> = 500 ml/min<br>Q <sub>2</sub> = 600 ml/min (Dialisado, 37°C)                                                                                         | Flowresistente dialysaatcompartiment (mmHg)/ max. waarden<br>Q <sub>0</sub> = 300 ml/min, Q <sub>1</sub> = 500 ml/min<br>Q <sub>2</sub> = 600 ml/min (Dialysaat, 37°C)                                                                                   | Αντίσταση ροής στο διαμέρισμα διαλύματος (mmHg)/μέγ. τιμές<br>Q <sub>0</sub> = 300 ml/λεπτό, Q <sub>1</sub> = 500 ml/λεπτό,<br>Q <sub>2</sub> = 600 ml/λεπτό (διάλυμα αιμοκάθαρσης, 37°C)                                                                                |
| 5 Maks. transmembrantrykk (mmHg)                                                                                                                                                                                                                            | Pressão transmembranária máx. (mmHg)                                                                                                                                                                                                                                        | Max. transmembraandruk (mmHg)                                                                                                                                                                                                                            | Μέγ. διαμεμβράνιη πίεση (mmHg)                                                                                                                                                                                                                                           |
| 6 Område for blodflowhastighet (ml/min)                                                                                                                                                                                                                     | Intervalo das taxas de fluxo sanguíneo (ml/min)                                                                                                                                                                                                                             | Snelheidstraject voor bloedflow (ml/min)                                                                                                                                                                                                                 | Εύρος ρυθμών αιματικής ροής (ml/λεπτό)                                                                                                                                                                                                                                   |
| 7 Område for dialyseflowhastighet (ml/min)                                                                                                                                                                                                                  | Intervalo das taxas de fluxo de dialisante (ml/min)                                                                                                                                                                                                                         | Snelheidstraject voor dialysaatflow (ml/min)                                                                                                                                                                                                             | Εύρος ρυθμών ροής διαλύματος (ml/λεπτό)                                                                                                                                                                                                                                  |
| 8 Restblodvolum (ml)                                                                                                                                                                                                                                        | Volume de sangue residual (ml)                                                                                                                                                                                                                                              | Residual bloodvolume (ml)                                                                                                                                                                                                                                | Υπολειπόμενος όγκος αίματος (ml)                                                                                                                                                                                                                                         |
| 9 Væskedvolum nødvendig for priming og skylning (ml)                                                                                                                                                                                                        | Volumes de líquido necessários para o esvaziamento e enxaguamento (ml)                                                                                                                                                                                                      | Vloeistofvolumen nodig voor priming en sproeien (ml)                                                                                                                                                                                                     | Οι απαιτούμενοι όγκοι υγρού για πλήρωση και έκπλυση (ml)                                                                                                                                                                                                                 |
| 10 Membran<br>Effektiv membranoverflate (m <sup>2</sup> )<br>Veggløstelse (µm)<br>Indre diameter (µm)                                                                                                                                                       | Membrana<br>Área eficaz da membrana (m <sup>2</sup> )<br>Espessura da parede (µm)<br>Diâmetro interno (µm)                                                                                                                                                                  | Membran<br>Effektieve membranoppervlakte (m <sup>2</sup> )<br>Wanddikte (µm)<br>Binnenste diameter (µm)                                                                                                                                                  | Μεμβράνη<br>Ενεργός επιφάνεια μεμβράνης (m <sup>2</sup> )<br>Πέχος τοιχώματος (µm)<br>Εσωτερική διάμετρος (µm)                                                                                                                                                           |
| 11 Steriliseringmetode<br>Steril barriere<br>Enhetsstatus                                                                                                                                                                                                   | Agente de esterilização<br>Barreira esterilizada<br>Estado do dispositivo                                                                                                                                                                                                   | Sterilisatiemiddel<br>Steriele barrière<br>Apparatusstatus                                                                                                                                                                                               | Μέθοδος αποστείρωσης<br>Αποστειρωμένος φραγμός<br>Κατάσταση της συσκευής                                                                                                                                                                                                 |
| 12 Komponenter<br>Membran<br>Limsaltetale<br>Filterhus og holder<br>O-ringler<br>Beskyttelseshatt                                                                                                                                                           | Componentes<br>Membrana<br>Materiais de encapsulagem<br>Cabo e tampas<br>O-rings<br>Tampas de proteção                                                                                                                                                                      | Componenten<br>Membrana<br>Folingsmateriaal<br>Behuizing en deksels<br>O-ringen<br>Beschermdoppen                                                                                                                                                        | Στοιχεία<br>Μεμβράνη<br>Υλικό συγκόλλησης<br>Περιβλήμα και πακέτο<br>Διακότιο τύπου O<br>Προστατευτικά καπάκια                                                                                                                                                           |
| 13 Anbefalte koblinger for dialyseveskekobling                                                                                                                                                                                                              | Conectores recomendados para topos de dialisante                                                                                                                                                                                                                            | Aanbevolen connectors voor dialysaafpoorten                                                                                                                                                                                                              | Συνιστάμενοι συνδέσμοι για τις εισόδους του διαλύματος αιμοκάθαρσης                                                                                                                                                                                                      |
| 14 Anbefalte koblinger for blodtilkobling                                                                                                                                                                                                                   | Conectores recomendados para topos de sangue                                                                                                                                                                                                                                | Aanbevolen connectors voor bloedpoorten                                                                                                                                                                                                                  | Συνιστάμενοι συνδέσμοι για τις εισόδους αίματος                                                                                                                                                                                                                          |
| 15 Anbefalte lagringsforhold (°C)                                                                                                                                                                                                                           | Condições de armazenamento recomendadas (°C)                                                                                                                                                                                                                                | Aanbevolen opslagomstandigheden (°C)                                                                                                                                                                                                                     | Συνιστάμενες συνθήκες αποθήκευσης (°C / °F)                                                                                                                                                                                                                              |
| 16 Hemodialyse (HD) Q <sub>0</sub> = 500 ml/min, UF = 0 ml/min, målt i henhold til EN 1283 / ISO 8637, clearance in vitro (ml/min) ± 10 %                                                                                                                   | Hemodálise (HD) Q <sub>0</sub> = 500 ml/min, UF = 0 ml/min, avaliado em conformidade com a EN 1283 / ISO 8637, depuração in vitro (ml/min) ± 10 %                                                                                                                           | Hemodialyse (HD) Q <sub>0</sub> = 500 ml/min, UF = 0 ml/min, gemeten volgens EN 1283 / ISO 8637, klaring in vitro (ml/min) ± 10 %                                                                                                                        | Αιμοκάθαρση (HD) Q <sub>0</sub> = 500 ml/λεπτό, UF = 0 ml/λεπτό, Μέτρηση βάσει EN 1283 / ISO 8637, καθαρότητα in vitro (ml/min) ± 10 %                                                                                                                                   |
| 17 Slewingkoeffisient in vitro, målt i henhold til EN 1283 / ISO 8637 (± 20%); bovint plasma, 60 g/l, 37 °C                                                                                                                                                 | Coefficiente de Slewing in vitro, avaliado em conformidade com a EN 1283 / ISO 8637 (± 20%); plasma bovino, 60 g/l, 37°C                                                                                                                                                    | Zeeffcoëfficient in vitro, gemeten volgens EN 1283 / ISO 8637 (± 20%); runderplasma, 60 g/l, 37°C                                                                                                                                                        | Συντελεστής διαπερατότητας in vitro, Μέτρηση σύμφωνα βάσει EN 1283 / ISO 8637 (± 20%), πλάσμα βοοειδών, 60 g/l, 37°C                                                                                                                                                     |
| 18 Albuminap (HD) in vitro, Q <sub>0</sub> = 200 ml/min, Q <sub>1</sub> = 500 ml/min, UF = 0 ml/min, bovint plasma, 60 g/l, 37 °C, Albuminnivå 20–30 g/l                                                                                                    | Perda de albumina (HD) in vitro, Q <sub>0</sub> = 200 ml/min, Q <sub>1</sub> = 500 ml/min, UF = 0 ml/min, plasma bovino, 60 g/l, 37 °C, nível de albumina 20–30 g/l                                                                                                         | Albumineverlies (HD) in vitro, Q <sub>0</sub> = 200 ml/min, Q <sub>1</sub> = 500 ml/min, UF = 0 ml/min, runderplasma, 60 g/l, 37°C, Albuminegehalte 20–30 g/l                                                                                            | Απώλεια λευκοπρωτεΐνης (HD) in vitro, Q <sub>0</sub> = 200 ml/λεπτό, Q <sub>1</sub> = 500 ml/λεπτό, UF = 0 ml/λεπτό, πλάσμα βοοειδών, 60 g/l, 37°C, Επίπεδο λευκοπρωτεΐνης 20–30 g/l                                                                                     |
| <b>POLSKI</b>                                                                                                                                                                                                                                               | <b>TÜRKÇE</b>                                                                                                                                                                                                                                                               |                                                                                                                                                                                                                                                          |                                                                                                                                                                                                                                                                          |
| 1 Wsp. UF in vitro [ml/(h·mmHg)]                                                                                                                                                                                                                            | In vitro UF katsayısı [ml/(h·mmHg)]                                                                                                                                                                                                                                         |                                                                                                                                                                                                                                                          |                                                                                                                                                                                                                                                                          |
| 2 Objętość napełniania in vitro (ml)                                                                                                                                                                                                                        | In vitro hazırlık hacmi (ml)                                                                                                                                                                                                                                                |                                                                                                                                                                                                                                                          |                                                                                                                                                                                                                                                                          |
| 3 Opory przepływu przedziału krwi (mmHg)/wartości maks., UF = 0 ml/min<br>Q <sub>0</sub> = 200 ml/min, Q <sub>1</sub> = 300 ml/min,<br>Q <sub>2</sub> = 400 ml/min, Q <sub>3</sub> = 500 ml/min, (krew bydłowa,<br>hematokryt = 32%, białko = 60 g/l, 37°C) | Kan bölmesi akış direnci (mmHg)/maks. değerleri<br>Q <sub>0</sub> = 200 ml/dak, Q <sub>1</sub> = 300 ml/dak,<br>Q <sub>2</sub> = 400 ml/dak, Q <sub>3</sub> = 500 ml/dak, (sigir kanı, hematokrit = %32, protein = 60 g/l, 37°C)                                            |                                                                                                                                                                                                                                                          |                                                                                                                                                                                                                                                                          |
| 4 Opory przepływu przedziału dializatu (mmHg)/wartości maks.<br>Q <sub>0</sub> = 300 ml/min, Q <sub>1</sub> = 500 ml/min<br>Q <sub>2</sub> = 600 ml/min (dializat, 37°C)                                                                                    | Diyalizat bölmesi akış direnci (mmHg)/maks. değerleri<br>Q <sub>0</sub> = 300 ml/dak, Q <sub>1</sub> = 500 ml/dak,<br>Q <sub>2</sub> = 600 ml/dak (Diyalizat, 37°C)                                                                                                         |                                                                                                                                                                                                                                                          |                                                                                                                                                                                                                                                                          |
| 5 Maks. ciśnienie przezblonowe (mmHg)                                                                                                                                                                                                                       | Maks. transmembran basıncı (mmHg)                                                                                                                                                                                                                                           |                                                                                                                                                                                                                                                          |                                                                                                                                                                                                                                                                          |
| 6 Zakres szybkości przepływu krwi (ml/min)                                                                                                                                                                                                                  | Kan akış hızları aralığı (ml/dak)                                                                                                                                                                                                                                           |                                                                                                                                                                                                                                                          |                                                                                                                                                                                                                                                                          |
| 7 Zakres szybkości przepływu dializatu (ml/min)                                                                                                                                                                                                             | Diyalizat akış hızları aralığı (ml/dak)                                                                                                                                                                                                                                     |                                                                                                                                                                                                                                                          |                                                                                                                                                                                                                                                                          |
| 8 Objętość krwi pozostałej (ml)                                                                                                                                                                                                                             | Artık kan hacmi (ml)                                                                                                                                                                                                                                                        |                                                                                                                                                                                                                                                          |                                                                                                                                                                                                                                                                          |
| 9 Objętość płynu niezbędna no napełniania i płukania (ml)                                                                                                                                                                                                   | Doğulamra-ve-yıkama için gereken sıvı hacimleri (ml)                                                                                                                                                                                                                        |                                                                                                                                                                                                                                                          |                                                                                                                                                                                                                                                                          |
| 10 Błona<br>Efektywna powierzchnia błony (m <sup>2</sup> )<br>Grubość ścianki (µm)<br>Średnica wewnętrzna (µm)                                                                                                                                              | Membran<br>Etkil membran alanı (m <sup>2</sup> )<br>Çeper kalınlığı (µm)<br>İç çap (µm)                                                                                                                                                                                     |                                                                                                                                                                                                                                                          |                                                                                                                                                                                                                                                                          |
| 11 Czynniki sterylizacyjne<br>Przeграда sterylina<br>Stan urządzenia                                                                                                                                                                                        | Sterilizasyon ajanları<br>Steril bariyer<br>Cihazın durumu                                                                                                                                                                                                                  |                                                                                                                                                                                                                                                          |                                                                                                                                                                                                                                                                          |
| 12 Składniki<br>Błona<br>Materiał klejący<br>Obudowa i nasadki<br>O-ringi<br>Nasadki ochronne                                                                                                                                                               | Bileşenler<br>Membran<br>Yalıtım malzemesi<br>Gövde ve Kapaklar<br>O-ringler<br>Koruyucu Kapaklar                                                                                                                                                                           |                                                                                                                                                                                                                                                          |                                                                                                                                                                                                                                                                          |
| 13 Zalecane łączniki do portów dializatu                                                                                                                                                                                                                    | Diyalizat portları için önerilen konektörler                                                                                                                                                                                                                                |                                                                                                                                                                                                                                                          |                                                                                                                                                                                                                                                                          |
| 14 Zalecane łączniki do portów krwi                                                                                                                                                                                                                         | Kan portları için önerilen konektörler                                                                                                                                                                                                                                      |                                                                                                                                                                                                                                                          |                                                                                                                                                                                                                                                                          |
| 15 Zalecane warunki przechowywania (°C / °F)                                                                                                                                                                                                                | Önerilen saklama koşulları (°C / °F)                                                                                                                                                                                                                                        |                                                                                                                                                                                                                                                          |                                                                                                                                                                                                                                                                          |
| 16 Hemodializa (HD) Q <sub>0</sub> = 500 ml/min, UF = 0 ml/min, zmierzono zgodnie z normą EN 1283 / ISO 8637, klirens in vitro (ml/min) ± 10 %                                                                                                              | Hemodializ (HD) Q <sub>0</sub> = 500 ml/dak, UF = 0 ml/dak, EN 1283 / ISO 8637'ye göre ölçülmüştür, in vitro klirens (ml/dak) % ± 10                                                                                                                                        |                                                                                                                                                                                                                                                          |                                                                                                                                                                                                                                                                          |
| 17 Wsp. przepuszczalności in vitro zg. z normą EN 1283 / ISO 8637 (± 20%); osocze bydłowe, 60 g/l, 37 °C                                                                                                                                                    | Süzme katsayısı in vitro, EN 1283 / ISO 8637'ye göre ölçülmüştür (% ± 20); sigir plazma, 60 g/l, 37°C                                                                                                                                                                       |                                                                                                                                                                                                                                                          |                                                                                                                                                                                                                                                                          |
| 18 Utrata albuminy (HD) in vitro, Q <sub>0</sub> = 200 ml/min, Q <sub>1</sub> = 500 ml/min, UF = 0 ml/min, Osocze bydłowe, 60 g/l, 37°C, poziom albuminy 20–30 g/l                                                                                          | Albumin kaybı (HD) in vitro, Q <sub>0</sub> = 200 ml/dak, Q <sub>1</sub> = 500 ml/dak, UF = 0 ml/dak, sigir plazma, 60 g/l, 37°C, Albumin seviyesi 20–30 g/l                                                                                                                |                                                                                                                                                                                                                                                          |                                                                                                                                                                                                                                                                          |

# PERFORMANCES

## SPECIFICATIONS measured according to EN 1283 / ISO 8637

|    |                                                                                                                                                                                                                                                                       | Theralite                                                                                           |
|----|-----------------------------------------------------------------------------------------------------------------------------------------------------------------------------------------------------------------------------------------------------------------------|-----------------------------------------------------------------------------------------------------|
| 1  | UF coef. in vitro [ml/(h·mmHg)]                                                                                                                                                                                                                                       | 52                                                                                                  |
| 2  | Priming volume in vitro (ml)                                                                                                                                                                                                                                          | 140                                                                                                 |
| 3  | Flow resistance blood compartment (mmHg)/max. values<br>$Q_b = 200$ ml/min, UF = 0 ml/min<br>$Q_b = 300$ ml/min, UF = 0 ml/min<br>$Q_b = 400$ ml/min, UF = 0 ml/min<br>$Q_b = 500$ ml/min, UF = 0 ml/min<br>(Bovine blood, hematocrit = 32 %, protein = 60 g/l, 37°C) | < 100<br>< 130<br>< 160<br>< 190                                                                    |
| 4  | Flow resistance dialysate compartment (mmHg)/max. values<br>$Q_d = 300$ ml/min<br>$Q_d = 500$ ml/min<br>$Q_d = 800$ ml/min<br>(Dialysate, 37°C)                                                                                                                       | < 25<br>< 35<br>< 50                                                                                |
| 5  | Max. transmembrane pressure (mmHg)                                                                                                                                                                                                                                    | 300                                                                                                 |
| 6  | Range of blood flow rates (ml/min)                                                                                                                                                                                                                                    | 200-500                                                                                             |
| 7  | Range of dialysate flow rates (ml/min)                                                                                                                                                                                                                                | 300-800                                                                                             |
| 8  | Residual blood volume (ml)                                                                                                                                                                                                                                            | < 5                                                                                                 |
| 9  | Fluid volumes needed for priming and rinsing (ml)                                                                                                                                                                                                                     | ≥ 1000                                                                                              |
| 10 | Membrane<br>Effective membrane area (m <sup>2</sup> )<br>Wall thickness (µm)<br>Inner diameter (µm)                                                                                                                                                                   | 2.1<br>50<br>215                                                                                    |
| 11 | Sterilizing agent<br>Sterile barrier<br>Status of device                                                                                                                                                                                                              | Steam<br>Medical grade paper<br>Sterile and non-pyrogenic fluid pathways                            |
| 12 | Components<br>Membrane<br>Potting material<br>Housing and Caps<br>O-rings<br>Protective Caps                                                                                                                                                                          | PAES/PVP<br>Polyurethane (PUR)<br>Polycarbonate (PC)<br>Silicone rubber (SIR)<br>Polypropylene (PP) |
| 13 | Recommended connectors for dialysate ports                                                                                                                                                                                                                            | Acc. to EN 1283 / ISO 8637                                                                          |
| 14 | Recommended connectors for blood ports                                                                                                                                                                                                                                | Acc. to EN 1283 / ISO 8637                                                                          |
| 15 | Recommended storage conditions (°C / °F)                                                                                                                                                                                                                              | ≤ 30 / 86                                                                                           |

| 16 Hemodialysis (HD) $Q_b = 500$ ml/min, UF = 0 ml/min<br>Measured acc. to EN 1283 / ISO 8637,<br>clearance in vitro (ml/min) ± 10 % |     |     |     |     |
|--------------------------------------------------------------------------------------------------------------------------------------|-----|-----|-----|-----|
| $Q_b$ (ml/min)                                                                                                                       | 200 | 300 | 400 | 500 |
| Urea                                                                                                                                 | 199 | 286 | 349 | 390 |
| Creatinine                                                                                                                           | 196 | 273 | 326 | 361 |
| Phosphate                                                                                                                            | 195 | 269 | 320 | 354 |
| Vitamin B <sub>12</sub>                                                                                                              | 175 | 221 | 252 | 274 |
| Inulin                                                                                                                               | 157 | 191 | 214 | 230 |
| Myoglobin                                                                                                                            | 126 | 146 | 160 | 170 |

| 17 Sieving coefficient in vitro<br>Measured acc. to EN 1283 / ISO 8637,<br>(± 20 %); bovine plasma, 60 g/l, 37°C |      |
|------------------------------------------------------------------------------------------------------------------|------|
| Vitamin B <sub>12</sub>                                                                                          | 1.0  |
| Inulin                                                                                                           | 1.0  |
| Myoglobin                                                                                                        | 0.95 |
| Albumin                                                                                                          | 0.2  |

| 18 Albumin loss (HD) in vitro<br>$Q_b = 200$ ml/min, $Q_d = 500$ ml/min,<br>UF = 0 ml/min<br>Bovine plasma, 60 g/l, 37°C,<br>Albumin level 20-30 g/l. |       |
|-------------------------------------------------------------------------------------------------------------------------------------------------------|-------|
| Average loss per hour of treatment (g/h)                                                                                                              | ≤ 7.0 |

**APPENDIX 13: CLASSIFICATION OF ADVERSE EVENTS**

**Grille de Classification des Evénements Indésirables pour une Recherche Biomédicale portant sur un médicament ou un produit assimilé**

Risque de la Recherche : C

Comité de Surveillance Indépendant : Oui  Non

|                                                                                                                                                                                                                                                                                                                                                                                      |                                                                                                                                                                                                                                                                                                                                                                                                                                                                                                                                                                                                                                                                                                                                                                                                                                                                                                                                                                                                                                                                  |
|--------------------------------------------------------------------------------------------------------------------------------------------------------------------------------------------------------------------------------------------------------------------------------------------------------------------------------------------------------------------------------------|------------------------------------------------------------------------------------------------------------------------------------------------------------------------------------------------------------------------------------------------------------------------------------------------------------------------------------------------------------------------------------------------------------------------------------------------------------------------------------------------------------------------------------------------------------------------------------------------------------------------------------------------------------------------------------------------------------------------------------------------------------------------------------------------------------------------------------------------------------------------------------------------------------------------------------------------------------------------------------------------------------------------------------------------------------------|
| Grille d'EIG pour la Recherche Biomédicale (Art. R. 1123-54 du Code de la Santé publique)<br><b>Traitement de la néphropathie à cylindres myélateux. Etude MYRE. P081226</b>                                                                                                                                                                                                         |                                                                                                                                                                                                                                                                                                                                                                                                                                                                                                                                                                                                                                                                                                                                                                                                                                                                                                                                                                                                                                                                  |
| A NOTIFIER SANS DELAI par l'investigateur au promoteur<br>(envoi du formulaire de déclaration d'EIG par fax au 01 44 84 17 99)<br>et à reporter sur les pages événements indésirables du CRF                                                                                                                                                                                         |                                                                                                                                                                                                                                                                                                                                                                                                                                                                                                                                                                                                                                                                                                                                                                                                                                                                                                                                                                                                                                                                  |
| NE PAS NOTIFIER PAR FAX au promoteur<br>(pas de remplissage du formulaire de déclaration d'EIG)<br>mais à reporter sur les pages événements indésirables du CRF                                                                                                                                                                                                                      |                                                                                                                                                                                                                                                                                                                                                                                                                                                                                                                                                                                                                                                                                                                                                                                                                                                                                                                                                                                                                                                                  |
| Evénements autres                                                                                                                                                                                                                                                                                                                                                                    | Effets Indésirables Non Graves attendus                                                                                                                                                                                                                                                                                                                                                                                                                                                                                                                                                                                                                                                                                                                                                                                                                                                                                                                                                                                                                          |
| 1. <u>EVENEMENTS POUVANT ETRE GRIVES mais non liés aux médicaments(s) expérimental(aux) ou aux procédures de la recherche :</u><br><br>Insuffisance rénale sévère<br>Anurie<br>Syndrome d'hyperviscosité                                                                                                                                                                             | Effets Indésirables Graves attendus<br><br><b>Effets indésirables décrits par un grade supérieur ou égal à III (CTCAE V3.0)</b><br><br>- Toxicités liées à l'Endoxan<br>Augmentation des transaminases, sensations vertigineuses.<br><br>- Toxicités liées au Bortezomib<br>Bronchite, neuropathie périphérique sensitive, anorexie, hypotension, hypertension, plêhite, éruption cutanée.<br><br>- Toxicités liées au Thalidomide<br>Bradycardie, vertige, paresthésie, vertiges, dysesthésie, tremblements, œdème périphérique, neuropathie périphérique, constipation, asthénie, hyposalivie.<br><br>- Toxicités communes<br>Neutropénie, thrombocytopénie, anémie, leucopénie, lymphopénie, vomissements, nausées, diarrhées, fièvre, confusion mentale, dépression.<br><br>- Toxicités liées aux Corticoïdes<br>Désordre hydro-électrolytiques, troubles endocriniens et métaboliques, troubles musculo-squelettiques, troubles digestifs, troubles cutanés, troubles neuropsychiques.<br><br><i>Listes non exhaustives cf. RCP pour plus d'information</i> |
| 2. <u>EFFETS INDESIRABLES EVENTUELLEMENT GRIVES MAIS BIEN CONNUS, IRES FREQUENTS ET BIEN MAITRISÉS DONT LA DECLARATION N'APPORTERAIT RIEN A LA SECURITE DES PATIENTS</u><br>(exemple: aplasie médullaire lors des chimiothérapies... ; à ne pas notifier sauf si aggravation (exemple: infection compliquant l'aplasie médullaire...))<br><br>Aplasie médullaire post-chimiothérapie | Effets Indésirables Graves inattendus<br><br>Cette colonne se remplira au fur et à mesure des notificateur par les investigateurs.<br><br>Notifier tous les événements présentant l'un des critères de gravité* noté ci-dessous, à l'exception de ceux identifiés dans les autres colonnes<br><br>* Critères de gravité :<br>1- Décès<br>2- Mise en jeu du pronostic vital<br>3- Nécessite ou prolonge l'hospitalisation<br>4- Séquelles durables<br>5- Anomalie ou malformation congénitale<br>6- Evénement jugé grave par l'investigateur (raison à préciser)<br><br>ATTENTION : toute découverte d'une GROSSESSE au décours d'une recherche biomédicale doit être immédiatement déclarée au promoteur et fera l'objet d'un suivi jusqu'à l'accouchement.                                                                                                                                                                                                                                                                                                      |
| Nom, prénom et signature de l'investigateur coordonnateur :<br>Pr FERMAND Jean Paul                                                                                                                                                                                                                                                                                                  | Nom, prénom et signature du responsable de l'URC: Pr CHEVRET Sylvie                                                                                                                                                                                                                                                                                                                                                                                                                                                                                                                                                                                                                                                                                                                                                                                                                                                                                                                                                                                              |
| Nom, prénom et signature du référent projet :<br>VANHOYE Damien                                                                                                                                                                                                                                                                                                                      | Nom, prénom et signature du responsable pharmacovigilance:<br>BROCVIELLE Hélène                                                                                                                                                                                                                                                                                                                                                                                                                                                                                                                                                                                                                                                                                                                                                                                                                                                                                                                                                                                  |
| Nom, prénom et signature du coordonnateur médical:<br>Pr CHASSANY Olivier                                                                                                                                                                                                                                                                                                            | Nom, prénom et signature de l'investigateur (raison à préciser)                                                                                                                                                                                                                                                                                                                                                                                                                                                                                                                                                                                                                                                                                                                                                                                                                                                                                                                                                                                                  |

**Grille de Classification des Evénements Indésirables pour une Recherche Biomédicale portant sur le dispositif médical utilisé**

Risque de la Recherche : C

Comité de Surveillance Indépendant : Oui  Non

Grille d'EIG pour la Recherche Biomédicale (Art. R. 1123-54 du Code de la Santé publique)

**Traitement de la néphropathie à cylindres myélateux. Etude MYRE. P081226**

**NE PAS NOTIFIER PAR FAX au promoteur**  
(pas de remplissage du formulaire de déclaration d'EIG)  
**mais à reporter sur les pages événements indésirables du CRF**

**A NOTIFIER SANS DELAI par l'investigateur au promoteur**  
(envoi du formulaire de déclaration d'EIG par fax au 01 44 84 17 99)  
**et à reporter sur les pages événements indésirables du CRF**

| Evénements autres                                                                                                                                                  | Effets Indésirables Non Graves attendus                                                                                                                                                                                                                                                                                                       | Effets Indésirables Graves attendus                                                                                                                                                                                                                                                                                                                     | Effets Indésirables Graves inattendus                                                                                                                                                                                                                                                                                                                                                                                                                                                                                                                                                                                                                                                                                                                                                               |
|--------------------------------------------------------------------------------------------------------------------------------------------------------------------|-----------------------------------------------------------------------------------------------------------------------------------------------------------------------------------------------------------------------------------------------------------------------------------------------------------------------------------------------|---------------------------------------------------------------------------------------------------------------------------------------------------------------------------------------------------------------------------------------------------------------------------------------------------------------------------------------------------------|-----------------------------------------------------------------------------------------------------------------------------------------------------------------------------------------------------------------------------------------------------------------------------------------------------------------------------------------------------------------------------------------------------------------------------------------------------------------------------------------------------------------------------------------------------------------------------------------------------------------------------------------------------------------------------------------------------------------------------------------------------------------------------------------------------|
| <p><b>EVENEMENTS POUVANT ETRE GRAVES mais non liés au dispositif médical ou aux procédures de la recherche :</b></p> <p>Aplasie médullaire post-chimiothérapie</p> | <p>Commus pour être liés à la dialyse</p> <ul style="list-style-type: none"> <li>- Nausée, impression de « mal de mer ».</li> <li>- Chute de la tension artérielle.</li> <li>- Maux de tête.</li> <li>- Crampes musculaires.</li> <li>- Infections locales.</li> <li>- Sensations de brûlure, d'engourdissement et fourmillements.</li> </ul> | <p>Commus pour être liés à la dialyse</p> <ul style="list-style-type: none"> <li>- Fuite interne de sang.</li> <li>- Fuite externe de sang.</li> <li>- Pénétration d'air dans le circuit sang extracorporel (risque d'embolie gazeuse).</li> <li>- Coagulation à l'intérieur du dialyseur.</li> <li>- Réaction allergique (rash, collapsus).</li> </ul> | <p>Cette colonne se remplira au fur et à mesure des notifications par les investigateurs.</p> <p>Notifier tous les événements présentant l'un des critères de gravité* noté ci-dessous, à l'exception de ceux identifiés dans les autres colonnes</p> <p>* Critères de gravité :</p> <ol style="list-style-type: none"> <li>1- Décès</li> <li>2- Mise en jeu du pronostic vital</li> <li>3- Nécessité ou prolonge l'hospitalisation</li> <li>4- Séquelles durables</li> <li>5- Anomalie ou malformation congénitale</li> <li>6- Evénement jugé grave par l'investigateur (raison à préciser)</li> </ol> <p>ATTENTION : toute découverte d'une GROSSESSE au décours d'une recherche biomédicale doit être immédiatement déclarée au promoteur et fera l'objet d'un suivi jusqu'à l'accouchement.</p> |

|                                                                                  |                                                                     |                                                              |                                                                              |                                                                        |
|----------------------------------------------------------------------------------|---------------------------------------------------------------------|--------------------------------------------------------------|------------------------------------------------------------------------------|------------------------------------------------------------------------|
| Nom, prénom et signature de l'investigateur coordonnateur : Pr FERMAND Jean Paul | Nom, prénom et signature du responsable de l'URC: Pr CHEVRET Sylvie | Nom, prénom et signature du référent projet : VANHOYE Damien | Nom, prénom et signature du responsable pharmacovigilance: BROCVIELLE Hélène | Nom, prénom et signature du coordonnateur médical: Pr CHASSANY Olivier |
|----------------------------------------------------------------------------------|---------------------------------------------------------------------|--------------------------------------------------------------|------------------------------------------------------------------------------|------------------------------------------------------------------------|

## APPENDIX 14: SCHEDULE OF ASSESSMENTS

|                                                                    | Inclusion | Randomisation | Cycle 1<br>(J21) | Cycle 2<br>(J21) | Cycle 3<br>(J21) | Cycle 4<br>(J21) | Cycle 5<br>(J21) | Cycle 6<br>(J21) | Bilan<br>1 an |
|--------------------------------------------------------------------|-----------|---------------|------------------|------------------|------------------|------------------|------------------|------------------|---------------|
| <b>Examen Clinique</b>                                             |           |               |                  |                  |                  |                  |                  |                  |               |
| Pouls                                                              | X         | X             | X                | X                | X                | X                | X                | X                | X             |
| Pression artérielle                                                | X         | X             | X                | X                | X                | X                | X                | X                | X             |
| Diurèse des 24 heures                                              | X         | X             | X                | X                | X                | X                | X                | X                | X             |
| Poids                                                              | X         | X             | X                | X                | X                | X                | X                | X                | X             |
| <b>Examens biologiques</b>                                         |           |               |                  |                  |                  |                  |                  |                  |               |
| NFS, plaquettes                                                    | X         | X             | X                | X                | X                | X                | X                | X                | X             |
| Bilan de coagulation (TP, TCA)                                     | X         | X             | X                | X                | X                | X                | X                | X                | X             |
| Créatininémie, urée                                                | X         | X             | X                | X                | X                | X                | X                | X                | X             |
| Ionogramme sanguin (Na, K, Cl, HCO <sub>3</sub> )                  | X         | X             | X                | X                | X                | X                | X                | X                | X             |
| Calcémie, phosphorémie, calcémie ionisée                           | X         | X             | X                | X                | X                | X                | X                | X                | X             |
| Albuminémie, CRP                                                   | X         | X             | X                | X                | X                | X                | X                | X                | X             |
| Bilan hépatique                                                    | X         | X             | X                | X                | X                | X                | X                | X                | X             |
| Ionogramme urinaire (Na, K, Cl),<br>urée, créatinine urinaires     | X         | X             | X                | X                | X                | X                | X                | X                | X             |
| Protéinurie des 24 heures                                          | X         | X             | X                | X                | X                | X                | X                | X                | X             |
| Bandelette urinaire                                                | X         | X             | X                | X                | X                | X                | X                | X                | X             |
|                                                                    |           |               |                  |                  |                  |                  |                  |                  |               |
| Electrophorèse des protides (EP) sériques                          | X         | X             | X                | X                | X                | X                | X                | X                | X             |
| Dosage des chaînes légères libres sériques                         | X         | X             | X                | X                | X                | X                | X                | X                | X             |
| Electrophorèse des protides (EP) urinaires                         | X         |               | X                | X                | X                | X                | X                | X                | X             |
| β <sub>2</sub> microglobuline                                      | X         |               | X                | X                | X                | X                | X                | X                | X             |
| LDH                                                                | X         |               |                  |                  |                  |                  |                  |                  |               |
| Immunoélectrophorèse (IEP)<br>ou immunofixation (IF) sérique       | X         |               |                  |                  |                  |                  |                  |                  | X             |
| IEP ou IF urinaires                                                | X         |               |                  |                  |                  |                  |                  |                  | X             |
| Myélogramme ou biopsie ostéo-médullaire                            | X         |               |                  |                  |                  |                  |                  |                  | X             |
| Radiographies du squelette                                         | X         |               |                  |                  |                  |                  |                  |                  | X             |
|                                                                    |           |               |                  |                  |                  |                  |                  |                  |               |
| Sérologies (HIV, hépatite B et C,<br>herpes-varicelle-zona)        | X         |               |                  |                  |                  |                  |                  |                  | X             |
| Test de grossesse (betaHCG)<br>pour les femmes en âges de procréer | X         | X             | X                | X                | X                | X                | X                | X                | X             |
